# Supplementary material
Source: MDPI journal article supplement (https://www.mdpi.com/search?q=ijms-15-09285)
Supplement: s001 [file ijms-54611-Tables S1-S5 for publication.xlsx]

## Sheet: Table S1
Table S1.
This file contains a list of all proteins identified with the SDS-PAGE based platform.
Raw data files and database search files are available from the authors upon request.
Accession	Description	ΣCoverage	Σ# Proteins	Σ# Unique Peptides	Σ# Peptides	Σ# PSMs	MW [kDa]	calc. pI	Score A2	Coverage A2	# Peptides A2	# PSM A2	Score B2	Coverage B2	# Peptides B2	# PSM B2	Score C2	Coverage C2	# Peptides C2	# PSM C2	# AAs
P15999	ATP synthase subunit alpha, mitochondrial OS=Rattus norvegicus GN=Atp5a1 PE=1 SV=2 - [ATPA_RAT]	65.28	2	16	40	6683	59.7166	9.18799	8564.84	63.11	34	2611	6105.35	63.11	37	1890	6939	65.28	36	2182	553
G3V8B0	Myosin-7 OS=Rattus norvegicus GN=Myh7 PE=4 SV=1 - [G3V8B0_RAT]	67.39	2	48	172	6655	222.762	5.75732	2412.57	56.07	119	751	9770.14	65.79	161	2963	9397.1	67.34	168	2941	1935
G3V885	Myosin-6 OS=Rattus norvegicus GN=Myh6 PE=4 SV=1 - [G3V885_RAT]	65.81	1	44	166	5979	223.371	5.73193	2263.54	55.75	120	708	8432.43	64.98	155	2602	8303.48	65.29	161	2669	1939
G3V6D3	ATP synthase subunit beta OS=Rattus norvegicus GN=Atp5b PE=3 SV=1 - [G3V6D3_RAT]	75.43	2	30	30	4852	56.3095	5.2749	6725.61	75.43	28	2181	4135.34	71.83	27	1330	4041.27	71.83	28	1341	529
M0R4D7	Uncharacterized protein OS=Rattus norvegicus PE=3 SV=1 - [M0R4D7_RAT]	53	1	1	25	4516	51.6642	8.88037	6153.24	52.17	22	1813	4211.14	52.8	24	1263	4785.99	53	22	1440	483
Q5BJZ3	Nicotinamide nucleotide transhydrogenase OS=Rattus norvegicus GN=Nnt PE=2 SV=1 - [Q5BJZ3_RAT]	42.54	1	49	49	3913	113.796	7.88428	6491.4	41.71	45	2049	2614.57	35.27	39	924	2508.29	38.77	40	940	1086
Q05962	ADP/ATP translocase 1 OS=Rattus norvegicus GN=Slc25a4 PE=1 SV=3 - [ADT1_RAT]	67.79	2	1	31	3717	32.9682	9.78857	7523.65	67.79	28	2381	2100.91	58.39	23	696	1828.3	59.06	25	640	298
Q6P9Y4	ADP/ATP translocase 1 OS=Rattus norvegicus GN=Slc25a4 PE=2 SV=1 - [Q6P9Y4_RAT]	70.47	2	2	32	3600	32.8832	9.74463	7178.72	70.47	28	2281	2049.73	61.07	24	680	1815.31	61.74	26	639	298
Q9ER34	Aconitate hydratase, mitochondrial OS=Rattus norvegicus GN=Aco2 PE=1 SV=2 - [ACON_RAT]	63.72	1	53	53	3471	85.38	7.82568	4604.64	60.51	47	1420	3590.79	60.13	46	1064	3137.77	63.33	51	987	780
Q64428	Trifunctional enzyme subunit alpha, mitochondrial OS=Rattus norvegicus GN=Hadha PE=1 SV=2 - [ECHA_RAT]	66.32	1	46	46	2949	82.6125	9.05615	4156.85	60.81	42	1324	2961.72	64.74	41	936	2113.15	64.61	42	689	763
Q5XI78	2-oxoglutarate dehydrogenase, mitochondrial OS=Rattus norvegicus GN=Ogdh PE=1 SV=1 - [ODO1_RAT]	62.85	1	65	76	2203	116.221	6.771	2563.81	60.31	62	887	1871.81	55.03	60	627	1754.21	59.53	68	689	1023
P04636	Malate dehydrogenase, mitochondrial OS=Rattus norvegicus GN=Mdh2 PE=1 SV=2 - [MDHM_RAT]	68.34	1	24	24	2071	35.6608	8.67529	2337.07	63.91	20	727	2133.56	68.34	23	648	2206.88	63.91	21	696	338
P56574	Isocitrate dehydrogenase [NADP], mitochondrial OS=Rattus norvegicus GN=Idh2 PE=1 SV=2 - [IDHP_RAT]	54.87	1	27	28	2040	50.9349	8.68994	2496.79	54.87	27	838	1844.05	51.55	26	585	1871.84	48.67	25	617	452
Q66HF1	NADH-ubiquinone oxidoreductase 75 kDa subunit, mitochondrial OS=Rattus norvegicus GN=Ndufs1 PE=1 SV=1 - [NDUS1_RAT]	66.99	1	42	42	1878	79.3616	5.89697	2074.66	62.31	39	695	2144.39	65.61	39	690	1457.99	65.61	37	493	727
Q5M9H2	Acyl-Coenzyme A dehydrogenase, very long chain OS=Rattus norvegicus GN=Acadvl PE=2 SV=1 - [Q5M9H2_RAT]	70.23	2	47	47	1799	70.7767	8.80713	2504.38	69.92	43	762	1862.55	63.66	40	559	1500.24	66.41	42	478	655
Q920L2	Succinate dehydrogenase [ubiquinone] flavoprotein subunit, mitochondrial OS=Rattus norvegicus GN=Sdha PE=1 SV=1 - [DHSA_RAT]	63.11	1	29	29	1700	71.5697	7.1665	2111.84	63.11	29	670	1724.84	62.04	28	555	1433.88	59.91	28	475	656
Q29RW1	Myosin-4 OS=Rattus norvegicus GN=Myh4 PE=2 SV=1 - [MYH4_RAT]	17.43	1	1	44	1612	222.741	5.74463	539.263	13.15	31	184	1984.26	17.02	40	646	2230.52	17.38	41	782	1939
F1LMU0	Myosin-4 OS=Rattus norvegicus GN=Myh4 PE=2 SV=1 - [F1LMU0_RAT]	17.43	1	1	44	1595	222.713	5.74463	534.539	13.15	31	183	1958.54	17.02	40	640	2191.71	17.38	41	772	1939
Q9Z2L0	Voltage-dependent anion-selective channel protein 1 OS=Rattus norvegicus GN=Vdac1 PE=1 SV=4 - [VDAC1_RAT]	73.85	4	10	16	1533	30.7366	8.54346	1637.45	65.72	13	488	1808.6	73.85	16	490	1972.84	65.72	14	555	283
Q09073	ADP/ATP translocase 2 OS=Rattus norvegicus GN=Slc25a5 PE=1 SV=3 - [ADT2_RAT]	64.43	3	6	26	1465	32.8801	9.72998	2620.56	62.08	24	842	1093.86	43.29	13	346	826.508	49.33	15	277	298
F1LRV9	Protein Myh2 OS=Rattus norvegicus GN=Myh1 PE=2 SV=2 - [F1LRV9_RAT]	15.85	1	1	39	1403	223.254	5.74463	412.179	11.48	26	147	1663.65	15.44	36	559	1936.07	15.8	37	697	1943
P15650	Long-chain specific acyl-CoA dehydrogenase, mitochondrial OS=Rattus norvegicus GN=Acadl PE=1 SV=1 - [ACADL_RAT]	43.26	1	21	21	1278	47.8424	7.73779	1446.76	43.26	21	500	1012.72	43.26	21	351	1207.19	43.26	21	427	430
G3V9U2	3-ketoacyl-CoA thiolase, mitochondrial OS=Rattus norvegicus GN=Acaa2 PE=4 SV=2 - [G3V9U2_RAT]	80.81	1	2	27	1231	41.7575	8.14795	1563.55	79.04	24	525	985.831	72.73	22	317	1163.25	78.79	25	389	396
P13437	3-ketoacyl-CoA thiolase, mitochondrial OS=Rattus norvegicus GN=Acaa2 PE=2 SV=1 - [THIM_RAT]	77.83	1	2	27	1212	41.8445	7.94287	1530.7	76.57	25	515	966.37	70.28	23	312	1145.4	75.82	25	385	397
G3V6D8	Myosin-3 OS=Rattus norvegicus GN=Myh3 PE=4 SV=1 - [G3V6D8_RAT]	12.37	2	1	30	1194	223.647	5.80811	321.923	9.33	21	124	1304.54	11.6	27	474	1542.07	10.82	26	596	1940
P32551	Cytochrome b-c1 complex subunit 2, mitochondrial OS=Rattus norvegicus GN=Uqcrc2 PE=1 SV=2 - [QCR2_RAT]	45.13	1	19	19	1170	48.3662	9.14404	1451.54	43.14	17	467	1069.89	44.03	17	340	1117.28	42.48	17	363	452
P19511	ATP synthase subunit b, mitochondrial OS=Rattus norvegicus GN=Atp5f1 PE=1 SV=1 - [AT5F1_RAT]	60.94	1	23	23	1164	28.8505	9.36377	1607.77	60.94	22	525	938.77	57.03	18	294	1080.25	60.16	20	345	256
P00507	Aspartate aminotransferase, mitochondrial OS=Rattus norvegicus GN=Got2 PE=1 SV=2 - [AATM_RAT]	68.6	3	27	27	1150	47.2841	8.99756	1580.43	62.56	25	539	795.587	61.4	24	272	1025.17	66.51	24	339	430
Q68FY0	Cytochrome b-c1 complex subunit 1, mitochondrial OS=Rattus norvegicus GN=Uqcrc1 PE=1 SV=1 - [QCR1_RAT]	58.96	1	19	19	1065	52.8154	5.88428	1319.34	52.29	17	427	1003.54	53.75	18	308	1020.47	58.96	19	330	480
Q3KR86	Mitochondrial inner membrane protein (Fragment) OS=Rattus norvegicus GN=Immt PE=1 SV=1 - [IMMT_RAT]	66.67	1	40	40	1058	67.1352	5.79541	1177.73	60.26	35	416	942.767	62.07	33	351	767.546	63.05	36	291	609
P35435	ATP synthase subunit gamma, mitochondrial OS=Rattus norvegicus GN=Atp5c1 PE=1 SV=2 - [ATPG_RAT]	54.95	3	15	15	995	30.1717	8.83643	881.586	38.83	12	382	690.375	52.38	13	296	749.572	52.38	13	317	273
M0R6J6	Creatine kinase S-type, mitochondrial OS=Rattus norvegicus GN=Ckmt2 PE=3 SV=1 - [M0R6J6_RAT]	30.34	1	6	15	973	46.4213	9.49561	1390.42	30.34	15	405	786.039	28.16	14	252	1014.9	28.16	14	316	412
P63039	60 kDa heat shock protein, mitochondrial OS=Rattus norvegicus GN=Hspd1 PE=1 SV=1 - [CH60_RAT]	72.6	4	40	40	938	60.9174	6.17627	1064.75	71.2	37	357	760.3	61.08	33	239	1040.93	71.03	37	342	573
P09605	Creatine kinase S-type, mitochondrial OS=Rattus norvegicus GN=Ckmt2 PE=1 SV=2 - [KCRS_RAT]	54.42	1	10	19	914	47.3553	8.51416	1326.8	54.18	18	382	809.767	52.03	15	242	952.628	52.27	18	290	419
B2GV06	Succinyl-CoA:3-ketoacid coenzyme A transferase 1, mitochondrial OS=Rattus norvegicus GN=Oxct1 PE=1 SV=1 - [SCOT1_RAT]	62.31	1	24	24	912	56.1681	8.47021	1007.55	55.96	20	309	912.44	54.81	20	282	992.813	62.31	24	321	520
F1M8F6	Myosin-8 (Fragment) OS=Rattus norvegicus GN=Myh8 PE=2 SV=2 - [F1M8F6_RAT]	10.65	2	1	25	900	223.666	6.40479	183.851	6.84	15	75	982.489	10.6	23	351	1263.6	9.72	21	474	1944
P13803	Electron transfer flavoprotein subunit alpha, mitochondrial OS=Rattus norvegicus GN=Etfa PE=1 SV=4 - [ETFA_RAT]	68.77	1	17	17	851	34.9295	8.38232	829.96	67.87	16	263	827.985	61.86	14	252	1075.49	65.77	16	336	333
P20788	Cytochrome b-c1 complex subunit Rieske, mitochondrial OS=Rattus norvegicus GN=Uqcrfs1 PE=1 SV=2 - [UCRI_RAT]	52.92	1	11	11	844	29.4272	8.86572	1151.21	52.55	10	362	615.23	52.92	11	223	718.531	52.92	11	259	274
G3V741	Phosphate carrier protein, mitochondrial OS=Rattus norvegicus GN=Slc25a3 PE=3 SV=1 - [G3V741_RAT]	44.38	2	16	16	834	39.5054	9.26123	1578.17	34.83	14	507	498.413	37.64	12	161	493.612	41.57	14	166	356
P18163	Long-chain-fatty-acid--CoA ligase 1 OS=Rattus norvegicus GN=Acsl1 PE=1 SV=1 - [ACSL1_RAT]	54.08	3	34	34	826	78.1282	6.99072	974.583	54.08	34	347	665.668	48.07	29	250	615.793	49.21	30	229	699
F1LX07	Protein Slc25a12 (Fragment) OS=Rattus norvegicus GN=Slc25a12 PE=3 SV=2 - [F1LX07_RAT]	66.07	1	30	34	793	74.1807	8.74854	1129	64.89	33	376	704.926	63.11	31	228	536.932	66.07	33	189	675
F1LM33	Leucine-rich PPR motif-containing protein, mitochondrial OS=Rattus norvegicus GN=Lrpprc PE=4 SV=2 - [F1LM33_RAT]	57.33	2	71	71	777	156.581	6.60986	774.061	52.01	61	265	860.78	54.6	66	288	569.869	51.65	61	224	1392
Q60587	Trifunctional enzyme subunit beta, mitochondrial OS=Rattus norvegicus GN=Hadhb PE=1 SV=1 - [ECHB_RAT]	68.21	1	28	28	726	51.3815	9.46631	966.032	54.53	25	363	483.509	56.63	23	202	363.694	58.11	25	161	475
Q66HF3	Electron transfer flavoprotein-ubiquinone oxidoreductase, mitochondrial OS=Rattus norvegicus GN=Etfdh PE=2 SV=1 - [Q66HF3_RAT]	50.32	2	27	27	705	68.1207	7.56201	676.939	47.08	24	256	567.89	47.89	25	223	592.971	44.32	22	226	616
Q5BK63	NADH dehydrogenase [ubiquinone] 1 alpha subcomplex subunit 9, mitochondrial OS=Rattus norvegicus GN=Ndufa9 PE=1 SV=2 - [NDUA9_RAT]	64.19	1	21	21	697	42.5323	9.81787	763.057	60.74	19	255	772.1	64.19	21	234	626.629	63.4	20	208	377
Q6P6R2	Dihydrolipoyl dehydrogenase, mitochondrial OS=Rattus norvegicus GN=Dld PE=1 SV=1 - [DLDH_RAT]	50.69	2	20	20	694	54.0041	7.86963	1050.07	47.94	17	292	635.248	49.51	19	198	636.449	50.1	19	204	509
P49432	Pyruvate dehydrogenase E1 component subunit beta, mitochondrial OS=Rattus norvegicus GN=Pdhb PE=1 SV=2 - [ODPB_RAT]	62.95	1	15	15	686	38.957	6.65381	982.732	62.95	14	286	612.097	60.72	14	188	686.585	60.72	14	212	359
Q06647	ATP synthase subunit O, mitochondrial OS=Rattus norvegicus GN=Atp5o PE=1 SV=1 - [ATPO_RAT]	72.3	1	14	14	672	23.3828	10.0229	1014.52	63.85	11	330	502.201	68.08	12	175	479.514	68.08	13	167	213
F1M789	Protein Myh13 OS=Rattus norvegicus GN=Myh13 PE=2 SV=2 - [F1M789_RAT]	9.73	2	2	22	670	222.521	5.52881	135.708	6.37	15	60	665.96	7.66	19	250	915.942	9.68	20	360	1932
P17764	Acetyl-CoA acetyltransferase, mitochondrial OS=Rattus norvegicus GN=Acat1 PE=1 SV=1 - [THIL_RAT]	63.68	1	23	23	653	44.6664	8.76318	837.336	56.13	19	261	563.714	63.68	23	178	645.136	63.68	20	214	424
F1M953	Stress-70 protein, mitochondrial OS=Rattus norvegicus GN=Hspa9 PE=2 SV=1 - [F1M953_RAT]	56.7	3	37	37	649	73.6988	6.16357	623.261	55.23	31	239	583.669	55.52	32	206	533.673	56.55	36	204	679
P08461	Dihydrolipoyllysine-residue acetyltransferase component of pyruvate dehydrogenase complex, mitochondrial OS=Rattus norvegicus GN=Dlat PE=1 SV=3 - [ODP2_RAT]	38.92	2	19	19	639	67.1234	8.52881	814.919	35.76	16	258	591.299	38.92	19	192	546.557	36.23	17	189	632
F1M2D3	Uncharacterized protein OS=Rattus norvegicus GN=Vdac1 PE=4 SV=2 - [F1M2D3_RAT]	39.36	2	2	8	623	30.7135	8.26514	715.707	36.52	7	215	661.708	39.36	8	191	725.056	39.36	8	217	282
Q5XIH3	NADH dehydrogenase (Ubiquinone) flavoprotein 1 OS=Rattus norvegicus GN=Ndufv1 PE=2 SV=1 - [Q5XIH3_RAT]	65.09	1	24	24	618	50.6986	8.07471	872.437	65.09	23	281	512.066	63.36	22	177	434.909	60.13	22	160	464
Q63704	Carnitine O-palmitoyltransferase 1, muscle isoform OS=Rattus norvegicus GN=Cpt1b PE=1 SV=1 - [CPT1B_RAT]	36.4	1	24	26	616	88.1592	8.60205	760.764	36.27	24	321	404.955	26.17	20	156	329.034	24.48	19	139	772
P15651	Short-chain specific acyl-CoA dehydrogenase, mitochondrial OS=Rattus norvegicus GN=Acads PE=1 SV=2 - [ACADS_RAT]	67.48	2	18	18	592	44.737	8.27979	942.457	53.64	14	291	344.905	53.4	14	111	608.924	59.22	16	190	412
P56571	ES1 protein homolog, mitochondrial OS=Rattus norvegicus PE=1 SV=2 - [ES1_RAT]	61.28	1	14	14	585	28.1549	8.92432	538.531	61.28	14	187	584.165	57.89	13	195	601.482	61.28	14	203	266
D3ZG43	NADH dehydrogenase (Ubiquinone) Fe-S protein 3 (Predicted), isoform CRA_c OS=Rattus norvegicus GN=Ndufs3 PE=3 SV=1 - [D3ZG43_RAT]	61.36	1	19	19	580	30.2076	7.53271	569.322	45.45	16	200	577.142	56.44	18	185	608.758	50	17	195	264
B0BMW2	3-hydroxyacyl-CoA dehydrogenase type-2 OS=Rattus norvegicus GN=Hsd17b10 PE=2 SV=1 - [B0BMW2_RAT]	89.27	2	22	22	568	27.2325	8.5874	583.327	89.27	22	195	555.068	86.21	21	168	669.024	86.21	21	205	261
D3ZE29	Uncharacterized protein (Fragment) OS=Rattus norvegicus PE=3 SV=2 - [D3ZE29_RAT]	26.43	3	1	11	539	34.4768	9.34912	678.719	26.43	11	277	317.011	18.15	7	131	339.569	18.15	7	131	314
D3ZQD3	2-oxoglutarate dehydrogenase, mitochondrial OS=Rattus norvegicus GN=Ogdhl PE=4 SV=1 - [D3ZQD3_RAT]	8.75	1	1	12	520	116.638	6.87354	497.903	7.87	8	197	381.965	7.48	10	160	355.72	7.58	10	163	1029
P31399	ATP synthase subunit d, mitochondrial OS=Rattus norvegicus GN=Atp5h PE=1 SV=3 - [ATP5H_RAT]	81.37	3	15	15	516	18.7516	6.59521	772.135	78.26	14	233	479.67	75.78	14	144	475.776	81.37	15	139	161
P00406	Cytochrome c oxidase subunit 2 OS=Rattus norvegicus GN=Mtco2 PE=2 SV=2 - [COX2_RAT]	30.84	2	6	6	500	25.9251	4.729	793.466	27.75	5	261	355.255	30.84	6	120	352.598	30.84	6	119	227
F1LZW6	Protein Slc25a13 (Fragment) OS=Rattus norvegicus GN=Slc25a13 PE=3 SV=1 - [F1LZW6_RAT]	68.59	1	29	33	496	74.3358	8.70459	604.814	56.15	28	206	510.336	58.96	27	162	376.894	58.22	27	128	675
P81155	Voltage-dependent anion-selective channel protein 2 OS=Rattus norvegicus GN=Vdac2 PE=1 SV=2 - [VDAC2_RAT]	60.34	2	13	14	474	31.7256	7.48877	508.825	53.22	13	188	390.286	56.95	12	144	374.637	56.95	12	142	295
P67779	Prohibitin OS=Rattus norvegicus GN=Phb PE=1 SV=1 - [PHB_RAT]	79.41	5	17	17	474	29.8019	5.75732	440.446	76.1	15	139	514.431	72.79	14	168	489.607	76.1	16	167	272
P14604	Enoyl-CoA hydratase, mitochondrial OS=Rattus norvegicus GN=Echs1 PE=1 SV=1 - [ECHM_RAT]	71.72	1	18	18	466	31.4962	8.1333	453.483	59.31	16	164	428.246	56.21	16	143	456.791	68.62	17	159	290
P26284	Pyruvate dehydrogenase E1 component subunit alpha, somatic form, mitochondrial OS=Rattus norvegicus GN=Pdha1 PE=1 SV=2 - [ODPA_RAT]	66.67	4	24	24	466	43.1986	8.19189	510.191	59.74	20	196	317.949	50.26	17	122	399.794	62.82	19	148	390
B6RK61	Myosin heavy chain 7B OS=Rattus norvegicus GN=Myh7b PE=2 SV=1 - [B6RK61_RAT]	4.33	1	1	10	458	221.494	5.90967	76.2175	3.09	7	30	437.281	3.19	7	182	584.07	3.86	9	246	1941
Q9JM53	Apoptosis-inducing factor 1, mitochondrial OS=Rattus norvegicus GN=Aifm1 PE=1 SV=1 - [AIFM1_RAT]	49.02	1	26	26	450	66.6808	8.96826	583.519	48.04	24	218	282.072	44.93	20	109	315.046	46.41	23	123	612
Q9WVK7	Hydroxyacyl-coenzyme A dehydrogenase, mitochondrial OS=Rattus norvegicus GN=Hadh PE=2 SV=1 - [HCDH_RAT]	61.46	1	14	14	449	34.4259	8.76318	527.114	60.19	13	171	443.943	61.46	13	146	392.424	61.46	14	132	314
Q68FU3	Electron transfer flavoprotein subunit beta OS=Rattus norvegicus GN=Etfb PE=2 SV=3 - [ETFB_RAT]	79.22	1	17	17	446	27.6701	7.75244	430.713	71.76	14	164	341.005	76.86	16	134	400.525	77.25	16	148	255
F1LN88	Aldehyde dehydrogenase, mitochondrial OS=Rattus norvegicus GN=Aldh2 PE=3 SV=2 - [F1LN88_RAT]	58.19	7	25	25	434	56.4807	7.32764	527.933	50.1	21	194	344.219	48.55	20	118	322.619	55.3	23	122	519
Q2TA68	Dynamin-like 120 kDa protein, mitochondrial OS=Rattus norvegicus GN=Opa1 PE=1 SV=1 - [OPA1_RAT]	56.15	4	50	50	426	111.238	7.53271	459.088	53.13	43	166	396.481	50.94	41	139	327.718	49.38	41	121	960
Q62651	Delta(3,5)-Delta(2,4)-dienoyl-CoA isomerase, mitochondrial OS=Rattus norvegicus GN=Ech1 PE=1 SV=2 - [ECH1_RAT]	56.27	1	14	14	419	36.1484	7.98682	347.604	35.47	10	130	425.532	48.32	13	153	372.063	45.87	12	136	327
G3V6H5	Mitochondrial 2-oxoglutarate/malate carrier protein OS=Rattus norvegicus GN=Slc25a11 PE=3 SV=1 - [G3V6H5_RAT]	49.36	2	12	12	417	34.1149	9.96436	583.465	49.36	12	201	316.175	42.99	10	111	315.104	42.99	10	105	314
P68035	Actin, alpha cardiac muscle 1 OS=Rattus norvegicus GN=Actc1 PE=2 SV=1 - [ACTC_RAT]	64.19	6	9	17	397	41.9919	5.38916	217.501	44.83	12	94	366.098	58.09	16	148	385.004	63.93	16	155	377
O55171	Acyl-coenzyme A thioesterase 2, mitochondrial OS=Rattus norvegicus GN=Acot2 PE=1 SV=1 - [ACOT2_RAT]	37.97	9	14	14	388	49.6697	7.82568	468.563	37.53	13	170	320.827	31.79	13	109	302.624	37.97	14	109	453
G3V936	Citrate synthase OS=Rattus norvegicus GN=Cs PE=3 SV=1 - [G3V936_RAT]	38.63	2	15	15	386	51.7975	8.41162	415.482	37.12	14	174	290.612	36.27	13	108	253.613	38.63	15	104	466
G3V7I0	Peroxiredoxin 3 OS=Rattus norvegicus GN=Prdx3 PE=4 SV=1 - [G3V7I0_RAT]	41.25	2	9	9	384	28.2815	7.54736	492.627	41.25	8	168	252.717	41.25	8	91	364.064	41.25	9	125	257
P16086	Spectrin alpha chain, non-erythrocytic 1 OS=Rattus norvegicus GN=Sptan1 PE=1 SV=2 - [SPTN1_RAT]	46.44	2	89	90	383	284.462	5.32568	474.385	37.9	71	153	347.038	33.13	59	126	259.05	28.03	54	104	2472
P14408-2	Isoform Cytoplasmic of Fumarate hydratase, mitochondrial OS=Rattus norvegicus GN=Fh - [FUMH_RAT]	62.31	2	21	21	375	50.1377	8.19189	505.05	60.39	19	160	322.952	53.75	18	107	318.359	60.6	20	108	467
Q499N5	Acyl-CoA synthetase family member 2, mitochondrial OS=Rattus norvegicus GN=Acsf2 PE=2 SV=1 - [ACSF2_RAT]	56.75	1	25	25	353	67.8429	8.11865	482.812	40.33	19	166	255.599	46.99	19	88	291.592	50.24	22	99	615
Q9R1Z0	Voltage-dependent anion-selective channel protein 3 OS=Rattus norvegicus GN=Vdac3 PE=1 SV=2 - [VDAC3_RAT]	56.18	2	13	14	350	30.7784	8.70459	541.839	53.36	13	195	209.268	34.98	9	77	204.052	26.86	8	78	283
D3ZIN5	Protein Vwa8 (Fragment) OS=Rattus norvegicus GN=Vwa8 PE=4 SV=2 - [D3ZIN5_RAT]	38.88	1	30	38	350	150.188	6.68311	315.532	27.76	28	110	366.666	35.45	32	125	310.807	32.31	30	115	1340
G3V7J0	Aldehyde dehydrogenase family 6, subfamily A1, isoform CRA_b OS=Rattus norvegicus GN=Aldh6a1 PE=3 SV=1 - [G3V7J0_RAT]	54.95	2	26	26	347	57.7105	8.17725	404.698	53.27	23	140	296.219	45.98	20	100	329.887	54.58	23	107	535
Q561S0	NADH dehydrogenase [ubiquinone] 1 alpha subcomplex subunit 10, mitochondrial OS=Rattus norvegicus GN=Ndufa10 PE=1 SV=1 - [NDUAA_RAT]	60.28	1	19	19	341	40.4676	7.79639	487.06	58.03	18	160	237.868	49.86	14	82	284.215	49.01	16	99	355
G3V7N5	Carnitine O-palmitoyltransferase 2, mitochondrial OS=Rattus norvegicus GN=Cpt2 PE=3 SV=1 - [G3V7N5_RAT]	48.63	2	27	27	339	74.0314	7.45947	430.948	46.2	24	137	377.816	40.73	23	119	248.671	41.79	23	83	658
P10888	Cytochrome c oxidase subunit 4 isoform 1, mitochondrial OS=Rattus norvegicus GN=Cox4i1 PE=1 SV=1 - [COX41_RAT]	52.66	1	11	11	329	19.5021	9.43701	319.456	45.56	8	132	260.546	36.09	7	104	231.981	52.66	11	93	169
F1LNF7	Isocitrate dehydrogenase [NAD] subunit alpha, mitochondrial OS=Rattus norvegicus GN=Idh3a PE=2 SV=1 - [F1LNF7_RAT]	47.54	2	17	17	325	39.557	6.91748	376.713	46.72	15	139	182.9	41.26	14	76	286.923	47.54	17	110	366
Q68FZ8	Propionyl coenzyme A carboxylase, beta polypeptide OS=Rattus norvegicus GN=Pccb PE=2 SV=1 - [Q68FZ8_RAT]	68.39	1	4	28	323	58.6411	7.84033	353.457	49.35	19	126	256.66	56.75	24	78	363.31	64.14	25	119	541
P05708	Hexokinase-1 OS=Rattus norvegicus GN=Hk1 PE=1 SV=4 - [HXK1_RAT]	44.23	2	8	43	313	102.342	6.7124	297.439	36.71	28	106	325.126	41.94	37	112	230.602	40.41	35	95	918
P11240	Cytochrome c oxidase subunit 5A, mitochondrial OS=Rattus norvegicus GN=Cox5a PE=1 SV=1 - [COX5A_RAT]	52.74	1	9	9	313	16.1193	6.53662	383.064	49.32	8	115	372.9	52.74	9	108	318.32	49.32	8	90	146
Q641Y2	NADH dehydrogenase [ubiquinone] iron-sulfur protein 2, mitochondrial OS=Rattus norvegicus GN=Ndufs2 PE=1 SV=1 - [NDUS2_RAT]	58.32	1	20	20	310	52.5276	6.99072	356.768	46.22	16	130	259.054	58.32	20	96	223.003	52.27	17	84	463
P11507-2	Isoform SERCA2A of Sarcoplasmic/endoplasmic reticulum calcium ATPase 2 OS=Rattus norvegicus GN=Atp2a2 - [AT2A2_RAT]	36.91	10	30	30	309	109.61	5.36377	600.986	34.8	28	209	163.003	23.17	15	56	114.875	28.28	18	44	997
P07633	Propionyl-CoA carboxylase beta chain, mitochondrial OS=Rattus norvegicus GN=Pccb PE=2 SV=1 - [PCCB_RAT]	64.88	1	1	26	301	58.589	7.47412	320.751	47.32	18	117	235.69	50.46	21	73	333.823	62.11	24	111	541
G3V6P2	Dihydrolipoamide S-succinyltransferase (E2 component of 2-oxo-glutarate complex), isoform CRA_a OS=Rattus norvegicus GN=Dlst PE=3 SV=1 - [G3V6P2_RAT]	32.82	2	11	11	297	48.8684	8.70459	426.721	31.06	10	136	284.614	25.99	9	88	234.539	24.23	8	73	454
P23965	Enoyl-CoA delta isomerase 1, mitochondrial OS=Rattus norvegicus GN=Eci1 PE=1 SV=1 - [ECI1_RAT]	49.48	2	12	12	296	32.234	9.53955	308.375	49.13	11	117	281.046	46.71	10	93	258.692	49.13	11	86	289
P00762	Anionic trypsin-1 OS=Rattus norvegicus GN=Prss1 PE=1 SV=1 - [TRY1_RAT]	8.13	1	1	1	294	25.9427	4.89404	323.397	8.13	1	83	433.281	8.13	1	111	365.619	8.13	1	100	246
M0RBL9	Protein Vwa8 (Fragment) OS=Rattus norvegicus GN=Vwa8 PE=4 SV=1 - [M0RBL9_RAT]	52.71	2	24	32	291	78.9472	6.88818	239.709	50	29	94	280.085	44.86	27	101	258.248	44.14	24	96	700
D4A0T0	Protein Ndufb10 OS=Rattus norvegicus GN=Ndufb10 PE=4 SV=1 - [D4A0T0_RAT]	56.82	1	11	12	290	20.8454	7.69385	335.9	56.25	11	116	328.321	46.59	9	94	271.499	51.14	10	80	176
D4A2A1	Uncharacterized protein OS=Rattus norvegicus PE=3 SV=2 - [D4A2A1_RAT]	16.03	1	1	5	287	31.7834	9.43701	696.198	16.03	5	207	173.023	5.57	2	51	104.916	5.57	2	29	287
Q5XIH7	Prohibitin-2 OS=Rattus norvegicus GN=Phb2 PE=1 SV=1 - [PHB2_RAT]	65.89	1	17	17	285	33.2919	9.83252	311.92	52.51	13	113	266.289	65.89	17	87	240.508	54.85	14	85	299
P60711	Actin, cytoplasmic 1 OS=Rattus norvegicus GN=Actb PE=1 SV=1 - [ACTB_RAT]	46.4	5	5	13	284	41.7097	5.47803	173.695	40.8	11	78	249.087	46.4	13	104	217.591	40.8	12	102	375
Q6PDU7	ATP synthase subunit g, mitochondrial OS=Rattus norvegicus GN=Atp5l PE=1 SV=2 - [ATP5L_RAT]	46.6	1	4	4	282	11.4261	9.5835	282.065	46.6	4	88	360.541	46.6	4	103	293.859	46.6	4	91	103
F1LM47	Protein Sucla2 OS=Rattus norvegicus GN=Sucla2 PE=2 SV=1 - [F1LM47_RAT]	44.3	1	18	18	272	50.2742	7.69385	299.271	38.92	14	106	213.976	38.71	13	79	245.783	42.15	17	87	465
P08733	Myosin regulatory light chain 2, ventricular/cardiac muscle isoform OS=Rattus norvegicus GN=Myl2 PE=1 SV=2 - [MLRV_RAT]	86.14	3	14	14	268	18.8684	4.93213	53.3002	53.01	7	21	338.337	86.14	14	113	367.341	81.33	13	134	166
F1M8L5	Propionyl-CoA carboxylase alpha chain, mitochondrial OS=Rattus norvegicus GN=Pcca PE=2 SV=2 - [F1M8L5_RAT]	55.11	2	2	30	267	69.1864	7.21045	260.675	46.81	26	108	260.815	48.4	25	90	182.438	46.65	23	69	626
M0RAQ6	Hexokinase-1 OS=Rattus norvegicus GN=Hk1 PE=3 SV=1 - [M0RAQ6_RAT]	36.93	2	1	36	267	97.9557	6.87354	245.381	31.25	24	92	270.804	34.55	30	93	195.97	33.86	29	82	880
Q4V8F9	Hydroxysteroid dehydrogenase-like protein 2 OS=Rattus norvegicus GN=Hsdl2 PE=2 SV=1 - [HSDL2_RAT]	34.35	1	14	14	264	58.3069	6.18896	322.23	33.78	12	104	260.848	25.95	11	79	244.894	29.96	11	81	524
P21913	Succinate dehydrogenase [ubiquinone] iron-sulfur subunit, mitochondrial OS=Rattus norvegicus GN=Sdhb PE=2 SV=2 - [DHSB_RAT]	57.45	1	14	14	261	31.8089	8.67529	232.546	48.23	12	103	200.418	53.55	12	77	224.848	57.45	14	81	282
P13086	Succinyl-CoA ligase [ADP/GDP-forming] subunit alpha, mitochondrial OS=Rattus norvegicus GN=Suclg1 PE=2 SV=2 - [SUCA_RAT]	45.09	1	14	14	261	36.125	9.48096	332.396	44.8	13	121	199.285	44.8	13	75	168.242	45.09	14	65	346
P14882	Propionyl-CoA carboxylase alpha chain, mitochondrial OS=Rattus norvegicus GN=Pcca PE=1 SV=3 - [PCCA_RAT]	53.32	1	4	32	255	81.5711	7.69385	260.38	46.27	28	107	242.507	43.28	25	84	169.259	41.79	23	64	737
D3ZE15	Protein LOC100911483 OS=Rattus norvegicus GN=Ndufa13 PE=4 SV=1 - [D3ZE15_RAT]	71.53	2	13	13	253	16.7657	9.48096	158.607	61.81	9	67	291.681	63.19	12	102	231.955	71.53	13	84	144
D3ZLT1	NADH dehydrogenase (Ubiquinone) 1 beta subcomplex, 7 (Predicted) OS=Rattus norvegicus GN=Ndufb7 PE=4 SV=1 - [D3ZLT1_RAT]	73.72	1	13	13	243	16.5572	8.45557	162.705	72.26	11	61	301.645	73.72	13	98	265.248	73.72	12	84	137
P10860	Glutamate dehydrogenase 1, mitochondrial OS=Rattus norvegicus GN=Glud1 PE=1 SV=2 - [DHE3_RAT]	56.27	2	24	24	239	61.3773	8.00146	149.522	41.4	17	62	230.259	48.21	20	80	267.857	56.27	24	97	558
Q63362	NADH dehydrogenase [ubiquinone] 1 alpha subcomplex subunit 5 OS=Rattus norvegicus GN=Ndufa5 PE=1 SV=3 - [NDUA5_RAT]	68.1	1	12	12	233	13.4033	7.43018	320.494	68.1	11	93	321.883	68.1	9	81	222.103	68.1	12	59	116
B0BNE6	NADH dehydrogenase (Ubiquinone) Fe-S protein 8 (Predicted), isoform CRA_a OS=Rattus norvegicus GN=Ndufs8 PE=2 SV=1 - [B0BNE6_RAT]	41.51	1	8	8	233	23.9547	6.21436	294.302	38.21	6	108	134.036	38.21	7	42	252.712	37.26	7	83	212
Q5XIF3	NADH dehydrogenase [ubiquinone] iron-sulfur protein 4, mitochondrial OS=Rattus norvegicus GN=Ndufs4 PE=1 SV=1 - [NDUS4_RAT]	61.14	1	16	16	231	19.7282	10.1401	168.848	58.29	11	59	268.178	55.43	14	87	257.593	48	10	85	175
Q68FT1	Ubiquinone biosynthesis protein COQ9, mitochondrial OS=Rattus norvegicus GN=Coq9 PE=2 SV=2 - [COQ9_RAT]	31.09	1	9	9	228	35.1235	5.77002	244.338	28.85	8	83	237.96	26.28	7	72	240.201	28.53	8	73	312
F1LXA0	NADH dehydrogenase (Ubiquinone) 1 alpha subcomplex, 12 (Predicted), isoform CRA_b OS=Rattus norvegicus GN=LOC100910710 PE=4 SV=2 - [F1LXA0_RAT]	82.76	1	13	13	224	17.1667	9.70068	201.256	77.93	11	77	232.248	82.76	13	79	193.011	77.93	12	68	145
D3ZCV0	Protein Actn2 OS=Rattus norvegicus GN=Actn2 PE=4 SV=1 - [D3ZCV0_RAT]	60.63	2	37	46	220	103.768	5.45264	78.0098	29.53	20	32	297.259	58.5	43	101	217.507	51.34	37	87	894
Q5RJN0	NADH dehydrogenase (Ubiquinone) Fe-S protein 7 OS=Rattus norvegicus GN=Ndufs7 PE=2 SV=1 - [Q5RJN0_RAT]	54.13	1	7	7	216	23.9294	9.99365	241.766	54.13	7	94	174.457	43.12	6	63	159.759	43.12	6	59	218
D3ZUX5	Coiled-coil-helix-coiled-coil-helix domain containing 3 (Predicted), isoform CRA_a OS=Rattus norvegicus GN=Chchd3 PE=4 SV=1 - [D3ZUX5_RAT]	42.29	1	12	12	214	26.4182	8.1333	238.591	25.99	8	103	124.204	33.48	10	43	172.093	34.8	10	68	227
G3V6S0	Protein Sptbn1 OS=Rattus norvegicus GN=Sptbn1 PE=4 SV=2 - [G3V6S0_RAT]	28.94	3	47	48	209	273.317	5.71924	263.986	22.36	37	99	154.856	16.8	27	59	133.863	19.09	29	51	2357
B0LPN4-2	Isoform 2 of Ryanodine receptor 2 OS=Rattus norvegicus GN=Ryr2 - [RYR2_RAT]	17.81	8	59	59	206	561.98	6.0874	268.513	14.96	48	93	167.902	9.16	30	59	143.942	9.64	32	54	4947
Q6IMF3	Keratin, type II cytoskeletal 1 OS=Rattus norvegicus GN=Krt1 PE=2 SV=1 - [K2C1_RAT]	8	1	5	7	204	64.7911	7.86963	243.87	7.68	5	87	163.832	8	7	59	152.137	8	6	58	625
G3V734	2,4-dienoyl CoA reductase 1, mitochondrial, isoform CRA_a OS=Rattus norvegicus GN=Decr1 PE=4 SV=1 - [G3V734_RAT]	50.15	2	13	13	199	36.1097	8.93896	199.504	41.79	11	69	176.127	36.42	11	58	193.939	44.78	12	72	335
P85834	Elongation factor Tu, mitochondrial OS=Rattus norvegicus GN=Tufm PE=1 SV=1 - [EFTU_RAT]	48.01	1	17	17	198	49.491	7.56201	193.823	39.82	12	77	153.544	44.03	15	56	174.398	41.37	14	65	452
P29266	3-hydroxyisobutyrate dehydrogenase, mitochondrial OS=Rattus norvegicus GN=Hibadh PE=1 SV=3 - [3HIDH_RAT]	48.96	1	16	16	196	35.2796	8.47021	245.557	48.96	14	78	202.604	48.06	14	61	179.208	48.96	15	57	335
P19234	NADH dehydrogenase [ubiquinone] flavoprotein 2, mitochondrial OS=Rattus norvegicus GN=Ndufv2 PE=1 SV=2 - [NDUV2_RAT]	56.05	1	11	11	196	27.3609	6.68311	240.244	44.76	9	85	169.628	56.05	11	54	177.411	56.05	11	57	248
Q8SEZ0	NADH-ubiquinone oxidoreductase chain 5 OS=Rattus norvegicus GN=Mt-nd5 PE=3 SV=1 - [Q8SEZ0_RAT]	14.61	2	7	7	194	68.5719	9.26123	314.727	14.61	7	127	87.702	12.48	5	40	60.5468	10.02	4	27	609
B1WC61	Acad9 protein OS=Rattus norvegicus GN=Acad9 PE=2 SV=1 - [B1WC61_RAT]	58.08	1	30	30	188	68.7997	7.69385	177.596	49.28	23	69	144.184	48.32	24	53	183.017	49.44	25	66	625
D3ZD09	Cytochrome c oxidase subunit 6B1 OS=Rattus norvegicus GN=Cox6b1 PE=4 SV=1 - [D3ZD09_RAT]	70.93	1	8	8	188	10.0649	8.71924	119.208	53.49	6	52	191.973	70.93	8	71	173.125	70.93	8	65	86
Q704S8	Carnitine O-acetyltransferase OS=Rattus norvegicus GN=Crat PE=1 SV=1 - [CACP_RAT]	39.78	2	18	18	187	70.7553	8.54346	196.89	33.55	14	82	132.789	29.55	14	50	144.44	32.11	13	55	626
Q5XIT9	Methylcrotonoyl-CoA carboxylase beta chain, mitochondrial OS=Rattus norvegicus GN=Mccc2 PE=2 SV=1 - [MCCB_RAT]	60.04	1	23	23	187	61.4784	8.30908	215.819	52.04	20	78	144.42	51.69	19	51	171.404	51.69	20	58	563
P52873	Pyruvate carboxylase, mitochondrial OS=Rattus norvegicus GN=Pc PE=1 SV=2 - [PYC_RAT]	41.43	1	33	33	183	129.695	6.81494	172.772	33.79	26	62	182.207	38.79	30	72	118.764	30.98	26	49	1178
D3ZZN3	Protein Acss1 OS=Rattus norvegicus GN=Acss1 PE=4 SV=1 - [D3ZZN3_RAT]	39.74	1	21	21	177	74.8439	6.85889	206.08	38.56	20	89	117.923	29.47	16	46	108.832	27.71	15	42	682
P12075	Cytochrome c oxidase subunit 5B, mitochondrial OS=Rattus norvegicus GN=Cox5b PE=1 SV=2 - [COX5B_RAT]	55.04	1	8	8	172	13.9059	7.78174	189.693	55.04	8	87	128.152	48.84	7	49	87.6151	42.64	6	36	129
D3ZEN5	Peroxiredoxin-5, mitochondrial (Fragment) OS=Rattus norvegicus GN=Prdx5 PE=2 SV=2 - [D3ZEN5_RAT]	76.4	3	16	16	170	16.9149	7.23975	123.879	72.67	10	46	211.442	75.78	13	65	173.411	71.43	12	59	161
Q4FZU2	Keratin, type II cytoskeletal 6A OS=Rattus norvegicus GN=Krt6a PE=1 SV=1 - [K2C6A_RAT]	10.14	6	3	6	167	59.2127	7.94287	189.017	3.99	2	59	169.62	7.61	4	50	186.97	10.14	5	58	552
Q5U1Z9	Metaxin 2 OS=Rattus norvegicus GN=Mtx2 PE=2 SV=1 - [Q5U1Z9_RAT]	52.09	1	13	13	167	29.699	5.33838	121.017	49.05	12	44	159.558	49.81	11	59	169.114	51.33	12	64	263
Q5RK08	Glioblastoma amplified sequence OS=Rattus norvegicus GN=Gbas PE=2 SV=1 - [Q5RK08_RAT]	52.67	1	12	12	165	32.9209	9.36377	203.749	52.67	12	72	151.242	48.4	9	44	162.576	49.11	9	49	281
P06685	Sodium/potassium-transporting ATPase subunit alpha-1 OS=Rattus norvegicus GN=Atp1a1 PE=1 SV=1 - [AT1A1_RAT]	30.89	9	22	22	159	112.982	5.45264	326.413	30.89	21	118	43.3538	13.59	10	20	33.7105	11.24	8	21	1023
Q80W89	NADH dehydrogenase [ubiquinone] 1 alpha subcomplex subunit 11 OS=Rattus norvegicus GN=Ndufa11 PE=2 SV=1 - [NDUAB_RAT]	78.72	1	9	9	157	14.8443	8.08936	295.658	78.72	9	89	114.991	59.57	4	36	106.8	75.18	5	32	141
Q924S5	Lon protease homolog, mitochondrial OS=Rattus norvegicus GN=Lonp1 PE=2 SV=1 - [LONM_RAT]	39.16	1	28	28	153	105.726	6.59521	150.9	30.32	21	51	161.834	38.21	26	54	122.393	29.58	22	48	950
D4A5L9	Protein LOC690675 OS=Rattus norvegicus GN=LOC690675 PE=3 SV=1 - [D4A5L9_RAT]	52.38	3	10	10	147	11.628	9.5835	139.81	50.48	7	47	157.944	50.48	8	54	144.372	51.43	9	46	105
D4A565	NADH dehydrogenase (Ubiquinone) 1 beta subcomplex, 5 (Predicted), isoform CRA_b OS=Rattus norvegicus GN=Ndufb5 PE=4 SV=1 - [D4A565_RAT]	33.86	1	10	10	145	21.6505	9.46631	110.926	31.22	8	39	155.845	33.86	10	55	147.731	31.22	8	51	189
F1LPV8	Protein Suclg2 OS=Rattus norvegicus GN=Suclg2 PE=2 SV=2 - [F1LPV8_RAT]	49.42	1	16	16	145	46.6095	7.7085	156.715	47.33	15	54	119.64	47.1	14	43	135.107	47.1	14	48	431
Q5BJQ0	Chaperone activity of bc1 complex-like, mitochondrial OS=Rattus norvegicus GN=Adck3 PE=2 SV=1 - [ADCK3_RAT]	24.04	1	11	11	144	72.1797	6.45557	119.578	17.41	7	45	143.099	20.65	9	46	161.428	22.8	10	53	649
P46462	Transitional endoplasmic reticulum ATPase OS=Rattus norvegicus GN=Vcp PE=1 SV=3 - [TERA_RAT]	54.34	4	30	30	140	89.2927	5.26221	258.974	53.23	29	88	59.6321	25.81	13	22	76.793	28.29	15	30	806
P07895	Superoxide dismutase [Mn], mitochondrial OS=Rattus norvegicus GN=Sod2 PE=1 SV=2 - [SODM_RAT]	44.14	1	7	7	139	24.6586	8.80713	171.42	40.09	6	58	120.966	31.08	5	34	161.428	35.14	6	47	222
Q6IFW6	Keratin, type I cytoskeletal 10 OS=Rattus norvegicus GN=Krt10 PE=2 SV=1 - [K1C10_RAT]	14.45	16	7	9	136	56.4705	5.14795	128.915	13.12	7	58	63.1134	10.27	6	33	80.722	11.98	7	45	526
P16409	Myosin light chain 3 OS=Rattus norvegicus GN=Myl3 PE=2 SV=2 - [MYL3_RAT]	74	3	12	14	134	22.1421	5.09717	40.9435	40	7	21	161.461	74	13	54	166.339	74	14	59	200
F1LP30	Methylcrotonoyl-CoA carboxylase subunit alpha, mitochondrial OS=Rattus norvegicus GN=Mccc1 PE=2 SV=1 - [F1LP30_RAT]	42.38	2	24	24	131	79.2454	7.13721	180.468	42.38	23	64	95.4433	20.42	12	34	98.161	32.73	18	33	715
Q68FX0	Isocitrate dehydrogenase [NAD] subunit beta, mitochondrial OS=Rattus norvegicus GN=Idh3B PE=1 SV=1 - [IDH3B_RAT]	37.14	1	12	12	130	42.3268	8.74854	209.723	37.14	12	70	65.4171	32.73	9	22	106.649	37.14	12	38	385
B0BN52	Mitochondrial carrier homolog 2 (C. elegans) OS=Rattus norvegicus GN=Mtch2 PE=2 SV=1 - [B0BN52_RAT]	40.59	1	9	9	130	33.506	8.25049	151.29	40.26	8	53	112.767	40.59	8	40	112.589	30.69	6	37	303
P38718-2	Isoform Short of Mitochondrial pyruvate carrier 2 OS=Rattus norvegicus GN=Mpc2 - [MPC2_RAT]	66.38	2	7	7	127	12.9599	10.77	305.865	66.38	7	109	27.1235	35.34	4	10	22.3615	35.34	4	8	116
Q5XIN6	LETM1 and EF-hand domain-containing protein 1, mitochondrial OS=Rattus norvegicus GN=Letm1 PE=1 SV=1 - [LETM1_RAT]	39.11	1	21	21	124	83.0079	6.59521	138.608	29.77	14	45	131.539	30.85	13	39	120.118	33.83	17	40	739
Q6AXV4	Sorting and assembly machinery component 50 homolog OS=Rattus norvegicus GN=Samm50 PE=1 SV=1 - [SAM50_RAT]	38.59	1	13	13	123	51.9274	6.80029	124.579	36.46	12	51	95.6902	30.49	11	39	87.8108	34.12	12	33	469
D4A7L4	NADH dehydrogenase (Ubiquinone) 1 beta subcomplex, 11 (Predicted) OS=Rattus norvegicus GN=Ndufb11 PE=4 SV=1 - [D4A7L4_RAT]	50.99	1	6	6	121	17.6229	5.23682	177.308	46.36	5	62	80.2426	46.36	5	33	62.2821	50.99	6	26	151
G3V796	Acetyl-Coenzyme A dehydrogenase, medium chain OS=Rattus norvegicus GN=Acadm PE=3 SV=1 - [G3V796_RAT]	41.33	2	15	15	121	46.5418	8.41162	93.6971	34.44	11	39	107.663	39.19	14	39	133.89	37.29	12	43	421
G3V6P7	Myosin, heavy polypeptide 9, non-muscle OS=Rattus norvegicus GN=LOC100911597 PE=4 SV=1 - [G3V6P7_RAT]	18.47	5	22	26	120	226.273	5.65576	84.1999	11.12	15	32	127.162	11.38	17	51	89.4025	15	19	37	1960
B2RYS2	Cytochrome b-c1 complex subunit 7 OS=Rattus norvegicus GN=Uqcrb PE=3 SV=1 - [B2RYS2_RAT]	63.06	1	9	9	119	13.5499	9.30518	83.5978	52.25	6	30	154.101	63.06	9	48	125.268	59.46	7	41	111
B2RYS8	NADH dehydrogenase (Ubiquinone) 1 beta subcomplex 8 OS=Rattus norvegicus GN=Ndufb8 PE=2 SV=1 - [B2RYS8_RAT]	58.6	1	9	9	119	21.9444	6.04932	90.1952	46.24	8	32	99.3316	58.6	9	35	123.484	58.6	9	52	186
F8WFI0	Delta-1-pyrroline-5-carboxylate dehydrogenase, mitochondrial OS=Rattus norvegicus GN=Tas1r2 PE=3 SV=2 - [F8WFI0_RAT]	40.39	4	14	14	118	61.7586	8.04541	138.158	29	10	39	97.236	26.87	11	32	144.952	38.79	13	47	562
Q5U1W6	Apolipoprotein O-like OS=Rattus norvegicus GN=Apool PE=2 SV=1 - [Q5U1W6_RAT]	48.82	1	9	9	118	28.2196	9.01221	143.864	48.82	8	46	127.97	48.82	9	37	117.989	48.82	8	35	254
Q66HP8	Mitochondrial carnitine/acylcarnitine carrier protein OS=Rattus norvegicus GN=Slc25a20 PE=2 SV=1 - [Q66HP8_RAT]	41.86	2	12	12	117	33.0492	9.40771	145.879	39.2	11	54	62.6206	25.91	8	28	79.015	28.9	8	35	301
P29419	ATP synthase subunit e, mitochondrial OS=Rattus norvegicus GN=Atp5i PE=1 SV=3 - [ATP5I_RAT]	39.44	1	3	3	116	8.24948	9.34912	123.858	35.21	2	50	117.225	39.44	3	38	89.3687	39.44	3	28	71
P27881	Hexokinase-2 OS=Rattus norvegicus GN=Hk2 PE=1 SV=1 - [HXK2_RAT]	32.39	2	19	22	115	102.478	6.1001	116.336	29.12	18	44	106.827	24.65	17	41	68.0874	24.97	17	30	917
B5DEL8	NADH dehydrogenase (Ubiquinone) Fe-S protein 5 OS=Rattus norvegicus GN=Ndufs5 PE=4 SV=1 - [B5DEL8_RAT]	65.09	2	7	7	113	12.6915	8.92432	109.923	50.94	6	41	128.829	65.09	7	37	119.175	65.09	7	35	106
B2RYW3	NADH dehydrogenase (Ubiquinone) 1 beta subcomplex, 9 OS=Rattus norvegicus GN=Ndufb9 PE=2 SV=1 - [B2RYW3_RAT]	55.87	1	8	8	112	21.8778	8.07471	149.827	55.87	8	47	116.137	51.96	7	34	102.598	43.02	6	31	179
P04692	Tropomyosin alpha-1 chain OS=Rattus norvegicus GN=Tpm1 PE=1 SV=3 - [TPM1_RAT]	55.99	16	24	24	111	32.6607	4.7417	12.7169	18.66	4	5	154.624	55.99	20	54	148.693	55.99	23	52	284
Q5XIC0	Enoyl-CoA delta isomerase 2, mitochondrial OS=Rattus norvegicus GN=Eci2 PE=1 SV=1 - [ECI2_RAT]	31.97	2	10	10	111	42.994	8.98291	121.711	22.51	8	45	93.8042	31.97	10	32	98.7809	27.88	8	34	391
B2RZD6	Ndufa4 protein OS=Rattus norvegicus GN=Ndufa4 PE=4 SV=1 - [B2RZD6_RAT]	47.56	1	6	6	111	9.32087	9.5249	64.8261	37.8	4	29	72.8343	37.8	5	30	112.166	47.56	6	52	82
H9KVF8	NADH-ubiquinone oxidoreductase chain 1 (Fragment) OS=Rattus norvegicus GN=7066247 PE=3 SV=1 - [H9KVF8_RAT]	11.64	3	5	5	111	36.089	6.93213	254.577	11.64	5	78	51.9691	8.81	3	17	47.0199	8.81	3	16	318
Q5PQZ9	NADH dehydrogenase [ubiquinone] 1 subunit C2 OS=Rattus norvegicus GN=Ndufc2 PE=2 SV=1 - [Q5PQZ9_RAT]	42.5	1	6	6	110	14.3493	9.39307	130.852	20.83	4	48	101.219	36.67	4	33	82.0976	26.67	5	29	120
Q7TP78	Aa2-258 OS=Rattus norvegicus GN=Ndufa8 PE=2 SV=1 - [Q7TP78_RAT]	37.04	1	7	7	107	21.952	8.104	68.0807	35.45	6	33	89.0583	37.04	7	37	88.9596	35.45	6	37	189
Q8VID1	Dehydrogenase/reductase SDR family member 4 OS=Rattus norvegicus GN=Dhrs4 PE=2 SV=2 - [DHRS4_RAT]	28.32	2	7	7	106	29.8028	9.5542	119.852	28.32	7	54	50.4481	28.32	7	27	55.0812	25.45	6	25	279
P29117	Peptidyl-prolyl cis-trans isomerase F, mitochondrial OS=Rattus norvegicus GN=Ppif PE=1 SV=2 - [PPIF_RAT]	48.06	1	8	8	105	21.7961	9.14404	60.429	33.98	4	19	112.371	44.17	7	36	140.889	48.06	8	50	206
F1LV63	Uncharacterized protein (Fragment) OS=Rattus norvegicus PE=4 SV=2 - [F1LV63_RAT]	10.21	1	1	2	105	31.3826	7.15186	76.4548	10.21	2	36	57.5071	10.21	2	27	109.515	10.21	2	42	284
D4ADS4	Protein Mgst3 OS=Rattus norvegicus GN=Mgst3 PE=4 SV=1 - [D4ADS4_RAT]	34.21	2	5	5	102	16.7216	9.49561	212.978	34.21	5	72	43.6462	18.42	3	17	34.4082	18.42	3	13	152
P05508	NADH-ubiquinone oxidoreductase chain 4 OS=Rattus norvegicus GN=Mtnd4 PE=2 SV=2 - [NU4M_RAT]	20.7	2	7	7	99	51.7655	9.40771	237.893	20.7	7	78	21.7854	13.29	4	9	34.0248	14.16	5	12	459
G3V7Y3	ATP synthase subunit delta, mitochondrial OS=Rattus norvegicus GN=Atp5d PE=3 SV=1 - [G3V7Y3_RAT]	22.02	2	5	5	99	17.5522	5.23682	61.5863	13.69	2	22	168.593	22.02	5	48	95.5903	19.05	4	29	168
D3ZKG1	Protein Mut OS=Rattus norvegicus GN=Mut PE=4 SV=1 - [D3ZKG1_RAT]	32.22	1	16	16	97	82.8727	7.03467	111.054	26.87	13	40	88.8926	25.8	13	30	76.7532	24.6	13	27	748
F1M5N4	Malic enzyme OS=Rattus norvegicus GN=Me3 PE=2 SV=2 - [F1M5N4_RAT]	45.79	1	16	16	96	67.1657	7.97217	86.7391	32.23	11	29	87.6283	40.33	14	33	88.2453	37.69	13	34	605
Q6P2A5	Adenylate kinase 3 OS=Rattus norvegicus GN=Ak3 PE=2 SV=1 - [Q6P2A5_RAT]	63.44	2	13	13	96	25.4785	8.85107	76.3066	54.19	10	31	96.541	44.93	9	31	102.672	53.3	11	34	227
P10817	Cytochrome c oxidase subunit 6A2, mitochondrial (Fragment) OS=Rattus norvegicus GN=Cox6a2 PE=1 SV=3 - [CX6A2_RAT]	43.62	2	2	2	95	10.4803	9.0708	16.5818	43.62	2	15	153.747	43.62	2	74	8.45535	43.62	2	6	94
P11951	Cytochrome c oxidase subunit 6C-2 OS=Rattus norvegicus GN=Cox6c2 PE=1 SV=3 - [CX6C2_RAT]	38.16	2	4	4	95	8.44945	10.0669	30.6197	27.63	2	29	15.4836	27.63	2	54	15.2525	38.16	4	12	76
Q641Z9	Protein Sdhc OS=Rattus norvegicus GN=Sdhc PE=2 SV=1 - [Q641Z9_RAT]	28.99	1	4	4	94	18.1907	10.2134	147.813	28.99	4	66	38.9954	17.16	2	16	37.2014	17.16	2	12	169
D3ZAF6	ATP synthase subunit f, mitochondrial OS=Rattus norvegicus GN=Atp5j2 PE=1 SV=1 - [ATPK_RAT]	26.14	1	3	3	93	10.4456	10.0376	83.8326	26.14	3	43	57.4719	26.14	3	26	49.5729	23.86	2	24	88
D3ZA93	Protein Acot13 OS=Rattus norvegicus GN=Acot13 PE=4 SV=1 - [D3ZA93_RAT]	66.43	1	6	6	93	15.2599	8.83643	85.9486	66.43	6	35	93.9935	53.57	5	34	62.7816	53.57	5	24	140
F1LN92	Protein Afg3l2 OS=Rattus norvegicus GN=Afg3l2 PE=2 SV=1 - [F1LN92_RAT]	32.67	4	21	22	93	89.2955	8.60205	53.3784	19.7	14	26	99.1332	24.44	16	42	54.3774	25.06	16	25	802
Q4QQV3	Protein FAM162A OS=Rattus norvegicus GN=Fam162a PE=2 SV=1 - [F162A_RAT]	32.9	3	8	8	91	17.8155	9.99365	64.1064	27.74	6	25	108.86	32.26	7	34	105.999	32.9	7	32	155
D3ZRN3	Protein Actbl2 OS=Rattus norvegicus GN=Actbl2 PE=3 SV=1 - [D3ZRN3_RAT]	14.89	2	2	4	89	41.9359	5.49072	59.6705	11.97	3	23	97.2013	14.89	4	37	79.1816	11.97	3	29	376
D3ZUF9	Pitrilysin metallepetidase 1 (Predicted) OS=Rattus norvegicus GN=Pitrm1 PE=3 SV=1 - [D3ZUF9_RAT]	34.17	1	21	21	89	108.475	7.32764	68.8068	21.28	13	25	99.7071	27.57	16	34	72.4757	27.78	17	30	954
D4A678	Protein Spta1 OS=Rattus norvegicus GN=Spta1 PE=2 SV=2 - [D4A678_RAT]	23.92	2	37	38	89	279.917	5.04639	218.708	23.51	37	74	24.2997	3.44	5	8	17.1839	4.59	6	7	2416
P29147	D-beta-hydroxybutyrate dehydrogenase, mitochondrial OS=Rattus norvegicus GN=Bdh1 PE=1 SV=2 - [BDH_RAT]	39.36	1	10	10	87	38.1773	8.83643	118.858	30.61	7	35	98.5157	36.44	9	30	80.146	31.2	7	22	343
D3ZFQ8	Cytochrome c-1 (Predicted), isoform CRA_b OS=Rattus norvegicus GN=Cyc1 PE=4 SV=2 - [D3ZFQ8_RAT]	5.99	1	2	2	86	23.006	10.272	40.0787	5.53	1	24	78.2926	5.99	2	34	60.2648	5.99	2	28	217
P29410-2	Isoform 2 of Adenylate kinase 2, mitochondrial OS=Rattus norvegicus GN=Ak2 - [KAD2_RAT]	56.03	2	11	11	86	25.5141	6.80029	48.345	56.03	11	19	109.603	56.03	11	34	101.642	56.03	11	33	232
P12007	Isovaleryl-CoA dehydrogenase, mitochondrial OS=Rattus norvegicus GN=Ivd PE=1 SV=2 - [IVD_RAT]	53.3	1	16	16	84	46.4058	7.89893	75.3702	33.73	11	31	53.6567	23.82	11	20	96.3827	47.17	13	33	424
Q5XHZ0	Heat shock protein 75 kDa, mitochondrial OS=Rattus norvegicus GN=Trap1 PE=1 SV=1 - [TRAP1_RAT]	31.87	2	17	18	84	80.4108	7.03467	64.1958	22.66	13	30	68.0017	23.09	12	26	69.9345	25.07	14	28	706
D4A3V2	NADH dehydrogenase [ubiquinone] 1 alpha subcomplex subunit 6 OS=Rattus norvegicus GN=Ndufa6 PE=3 SV=1 - [D4A3V2_RAT]	46.92	1	6	6	83	15.2141	10.1548	63.967	46.92	5	25	76.5271	39.23	4	32	60.7178	45.38	5	26	130
P25809	Creatine kinase U-type, mitochondrial OS=Rattus norvegicus GN=Ckmt1 PE=1 SV=1 - [KCRU_RAT]	8.37	2	1	3	81	46.9993	8.48486	127.506	5.98	2	32	97.064	3.83	1	23	104.507	6.22	2	26	418
B2GV15	Dihydrolipoamide branched chain transacylase E2 OS=Rattus norvegicus GN=Dbt PE=2 SV=1 - [B2GV15_RAT]	28.42	1	11	11	81	53.24	8.41162	79.005	16.6	7	32	78.2157	24.27	9	32	44.9232	23.86	9	17	482
P02770	Serum albumin OS=Rattus norvegicus GN=Alb PE=1 SV=2 - [ALBU_RAT]	34.7	1	16	16	80	68.6861	6.48096	124.673	31.58	14	41	54.2734	25.99	12	23	45.235	21.88	10	16	608
Q9QZ76	Myoglobin OS=Rattus norvegicus GN=Mb PE=1 SV=3 - [MYG_RAT]	50.65	1	7	7	79	17.146	8.104	72.0632	42.21	5	23	101.395	50.65	7	28	96.5042	42.86	6	28	154
D4AE56	Prostaglandin E synthase 2 (Predicted), isoform CRA_b OS=Rattus norvegicus GN=Ptges2 PE=4 SV=1 - [D4AE56_RAT]	39.32	1	10	10	78	43.4242	9.24658	92.7154	39.32	10	30	75.0578	33.33	8	24	61.925	30.21	8	24	384
G3V8U8	Branched-chain-amino-acid aminotransferase OS=Rattus norvegicus GN=Bcat2 PE=3 SV=1 - [G3V8U8_RAT]	44.02	2	15	15	78	44.2009	8.1626	110.444	43.51	14	41	37.3568	22.65	8	13	66.9257	29.52	10	24	393
P97532	3-mercaptopyruvate sulfurtransferase OS=Rattus norvegicus GN=Mpst PE=1 SV=3 - [THTM_RAT]	47.14	1	10	10	77	32.9194	6.31592	85.24	43.1	9	30	74.4151	42.76	9	25	71.1029	38.72	8	22	297
Q6IG01	Keratin, type II cytoskeletal 1b OS=Rattus norvegicus GN=Krt77 PE=2 SV=1 - [K2C1B_RAT]	7.32	3	1	4	77	57.2196	5.64307	89.161	2.31	1	29	91.7708	6.36	3	26	71.1983	7.32	3	22	519
D3ZZ21	NADH dehydrogenase (Ubiquinone) 1 beta subcomplex, 6 (Predicted) OS=Rattus norvegicus GN=Ndufb6 PE=4 SV=1 - [D3ZZ21_RAT]	45.31	1	5	5	77	15.6283	10.0376	92.4104	34.38	3	34	59.6859	45.31	5	25	43.6657	34.38	3	18	128
F1LPG5	Protein LOC691675 OS=Rattus norvegicus GN=LOC688963 PE=2 SV=1 - [F1LPG5_RAT]	47.29	5	7	7	77	15.055	9.81787	69.116	47.29	7	22	95.3442	47.29	7	30	81.3602	47.29	6	25	129
P97519	Hydroxymethylglutaryl-CoA lyase, mitochondrial OS=Rattus norvegicus GN=Hmgcl PE=2 SV=1 - [HMGCL_RAT]	38.77	1	8	8	75	34.1697	8.41162	70.6101	34.46	7	21	90.5083	38.77	8	27	82.4765	38.77	8	27	325
B0K020	CDGSH iron-sulfur domain-containing protein 1 OS=Rattus norvegicus GN=Cisd1 PE=3 SV=1 - [CISD1_RAT]	50	1	7	7	74	12.0891	8.83643	63.8335	50	6	27	97.1201	41.67	6	30	59.2363	41.67	5	17	108
P23562-2	Isoform Kidney of Band 3 anion transport protein OS=Rattus norvegicus GN=Slc4a1 - [B3AT_RAT]	18.75	3	11	11	74	94.0928	6.63916	187.273	18.75	11	65	9.09256	2.12	1	3	8.36762	4.95	3	6	848
Q5XIJ3	Isocitrate dehydrogenase 3 (NAD), gamma OS=Rattus norvegicus GN=Idh3g PE=2 SV=1 - [Q5XIJ3_RAT]	44.27	1	1	10	74	42.8232	9.01221	117.319	33.33	8	39	53.1657	36.13	8	21	41.3521	33.59	7	14	393
P26772	10 kDa heat shock protein, mitochondrial OS=Rattus norvegicus GN=Hspe1 PE=1 SV=3 - [CH10_RAT]	58.82	2	7	7	73	10.8949	8.92432	36.0204	47.06	5	13	79.7345	58.82	7	31	68.7295	58.82	7	29	102
Q07969	Platelet glycoprotein 4 OS=Rattus norvegicus GN=Cd36 PE=1 SV=3 - [CD36_RAT]	23.09	5	9	9	72	52.6973	8.55811	80.8245	21.4	8	30	67.2788	20.34	8	25	38.8395	23.09	8	17	472
O35796	Complement component 1 Q subcomponent-binding protein, mitochondrial OS=Rattus norvegicus GN=C1qbp PE=1 SV=2 - [C1QBP_RAT]	26.52	1	5	5	72	30.9775	4.86865	60.7914	26.52	5	19	83.5275	26.52	5	29	82.9079	26.52	5	24	279
Q9WUS0	GTP:AMP phosphotransferase AK4, mitochondrial OS=Rattus norvegicus GN=Ak4 PE=2 SV=1 - [KAD4_RAT]	64.57	1	11	11	69	25.1873	8.01611	60.4961	35.87	7	26	55.2206	51.57	9	22	50.6794	59.64	9	21	223
Q9Z1P2	Alpha-actinin-1 OS=Rattus norvegicus GN=Actn1 PE=1 SV=1 - [ACTN1_RAT]	19.17	1	2	14	68	102.896	5.37646	36.0363	12	8	16	82.5181	16.93	13	29	64.9031	12.78	10	23	892
P41565	Isocitrate dehydrogenase [NAD] subunit gamma 1, mitochondrial OS=Rattus norvegicus GN=Idh3g PE=2 SV=2 - [IDHG1_RAT]	44.27	1	1	10	67	42.8242	8.89502	111.288	33.33	8	37	42.5235	32.57	7	17	39.2494	30.03	6	13	393
M0R7V3	Protein Apoo OS=Rattus norvegicus GN=Apoo PE=4 SV=1 - [M0R7V3_RAT]	56.1	2	6	6	66	18.8116	8.35303	38.4494	31.1	3	13	94.0919	56.1	6	27	91.0471	56.1	6	26	164
D3ZUX7	Protein Acsf3 OS=Rattus norvegicus GN=Acsf3 PE=4 SV=1 - [D3ZUX7_RAT]	31.39	1	14	14	65	65.2248	8.68994	43.3201	20.75	9	18	66.2281	24.87	11	24	68.2462	26.93	11	23	583
Q5XIE6	3-hydroxyisobutyryl-CoA hydrolase, mitochondrial OS=Rattus norvegicus GN=Hibch PE=1 SV=2 - [HIBCH_RAT]	54.03	2	17	17	63	42.9973	8.45557	93.0889	48.31	15	34	32.661	25.97	8	12	53.0191	40.26	12	17	385
D3ZCZ9	Protein LOC100912599 OS=Rattus norvegicus GN=LOC100912599 PE=4 SV=1 - [D3ZCZ9_RAT]	65.52	2	6	8	63	13.0317	9.21729	53.2636	64.66	6	20	69.9233	65.52	7	24	56.0402	64.66	7	19	116
Q9QXQ0	Alpha-actinin-4 OS=Rattus norvegicus GN=Actn4 PE=1 SV=2 - [ACTN4_RAT]	21.62	1	6	16	61	104.849	5.43994	40.9815	14.27	10	17	64.8805	14.05	11	24	49.2177	11.31	9	20	911
D3ZXA6	Protein Pdpr OS=Rattus norvegicus GN=Pdpr PE=3 SV=1 - [D3ZXA6_RAT]	22.55	1	16	16	61	98.7556	6.48096	37.3757	12.64	9	14	74.9924	22.55	16	25	52.5791	19.25	14	22	878
G3V9Z3	Amine oxidase [flavin-containing] A OS=Rattus norvegicus GN=Maoa PE=4 SV=1 - [G3V9Z3_RAT]	18.25	4	8	8	61	59.4827	7.92822	76.4649	16.92	7	31	37.2046	11.79	5	14	38.2536	15.21	7	16	526
Q5M9I5	Cytochrome b-c1 complex subunit 6, mitochondrial OS=Rattus norvegicus GN=Uqcrh PE=3 SV=1 - [QCR6_RAT]	47.19	1	2	2	59	10.417	4.97021	41.4371	20.22	1	16	81.229	20.22	1	28	38.5336	47.19	2	15	89
P35738	2-oxoisovalerate dehydrogenase subunit beta, mitochondrial OS=Rattus norvegicus GN=Bckdhb PE=1 SV=3 - [ODBB_RAT]	34.62	1	10	10	58	42.7958	6.82959	94.7155	26.41	7	29	35.3124	22.82	6	12	54.3923	20.77	5	17	390
P35171	Cytochrome c oxidase subunit 7A2, mitochondrial OS=Rattus norvegicus GN=Cox7a2 PE=1 SV=1 - [CX7A2_RAT]	56.63	1	3	3	57	9.34695	10.272	57.8836	27.71	2	23	58.9	56.63	3	20	42.1307	56.63	3	14	83
A9UMV9	Ndufa7 protein OS=Rattus norvegicus GN=Ndufa7 PE=4 SV=1 - [A9UMV9_RAT]	55.36	1	7	7	57	12.4926	10.4771	24.2437	40.18	5	19	42.8488	41.96	6	22	28.6417	53.57	6	16	112
Q7TQ16	Cytochrome b-c1 complex subunit 8 OS=Rattus norvegicus GN=Uqcrq PE=3 SV=1 - [QCR8_RAT]	28.05	1	3	3	56	9.84321	10.521	50.1276	25.61	2	17	75.5004	18.29	2	20	62.7734	18.29	2	19	82
Q8K4G6	O-acetyl-ADP-ribose deacetylase MACROD1 (Fragment) OS=Rattus norvegicus GN=Macrod1 PE=2 SV=2 - [MACD1_RAT]	45.35	2	7	7	56	28.6249	8.41162	45.1339	45.35	7	16	62.0571	45.35	7	17	74.946	45.35	7	23	258
B2GUZ6	Protein Rtn4ip1 OS=Rattus norvegicus GN=Rtn4ip1 PE=2 SV=1 - [B2GUZ6_RAT]	42.93	1	12	12	56	43.5776	9.20264	83.215	41.16	11	32	22.9394	21.97	6	9	39.3958	29.55	9	15	396
G3V879	Ubiquinone biosynthesis protein COQ7 homolog OS=Rattus norvegicus GN=Coq7 PE=4 SV=2 - [G3V879_RAT]	84.92	2	11	11	56	20.1132	5.75732	44.9631	36.87	4	18	39.3787	41.9	5	15	54.0051	63.13	9	23	179
M0RAK2	Protein Isoc2a OS=Rattus norvegicus GN=Isoc2a PE=4 SV=1 - [M0RAK2_RAT]	46.8	1	5	5	56	22.2339	8.6167	99.1383	46.8	5	25	63.1754	46.8	5	15	62.5511	46.8	5	16	203
Q63355	Unconventional myosin-Ic OS=Rattus norvegicus GN=Myo1c PE=2 SV=2 - [MYO1C_RAT]	25.96	1	20	20	55	119.737	9.39307	54.696	19.16	14	21	38.5735	17.34	12	18	31.2496	11.3	9	16	1044
Q6IFV3	Keratin, type I cytoskeletal 15 OS=Rattus norvegicus GN=Krt15 PE=1 SV=1 - [K1C15_RAT]	7.61	22	3	5	54	48.8401	4.85596	22.5052	4.03	2	17	35.5814	7.61	5	18	34.3956	7.61	5	19	447
F1LSP2	Protein Acad10 OS=Rattus norvegicus GN=Acad10 PE=3 SV=2 - [F1LSP2_RAT]	29.09	2	22	22	54	119.113	8.68994	64.0253	21.14	16	23	52.1407	12.72	9	15	47.1801	15.34	11	16	1069
M0R570	5-hydroxytryptamine receptor 2B OS=Rattus norvegicus GN=Srl PE=4 SV=1 - [M0R570_RAT]	27.12	2	11	11	54	54.2701	6.63916	39.4052	14.41	6	14	66.2412	18.43	7	25	42.8432	23.52	8	15	472
Q4PP99	Cardiac troponin C OS=Rattus norvegicus GN=Tnnc1 PE=2 SV=1 - [Q4PP99_RAT]	44.72	1	8	8	54	18.4085	4.18311					98.4177	42.24	6	31	70.493	44.72	8	23	161
P04041	Glutathione peroxidase 1 OS=Rattus norvegicus GN=Gpx1 PE=1 SV=4 - [GPX1_RAT]	52.24	2	7	7	53	22.2923	7.86963	47.0057	28.86	4	20	46.339	38.81	4	16	43.4143	47.76	6	17	201
Q68FT3	Pyridine nucleotide-disulfide oxidoreductase domain-containing protein 2 OS=Rattus norvegicus GN=Pyroxd2 PE=2 SV=1 - [PYRD2_RAT]	40.45	1	16	16	52	62.8394	8.17725	65.6797	31.15	11	20	39.8868	33.39	12	17	47.6137	28.06	12	15	581
D4A115	Protein Col6a3 OS=Rattus norvegicus GN=Col6a3 PE=2 SV=2 - [D4A115_RAT]	9	2	12	12	52	240.048	6.37939	16.81	3.57	5	7	64.8521	4.98	7	21	62.1923	7.33	10	24	2211
F1LRY5	RCG45398 OS=Rattus norvegicus GN=Sardh PE=3 SV=2 - [F1LRY5_RAT]	22.96	2	17	17	51	101.35	6.62451	45.5923	12.95	9	17	43.6588	17.74	12	17	33.8778	14.69	11	17	919
Q5I0K3	Citrate lyase subunit beta-like protein, mitochondrial OS=Rattus norvegicus GN=Clybl PE=2 SV=2 - [CLYBL_RAT]	50.59	2	12	12	50	37.2976	7.97217	65.2266	47.04	10	21	51.1058	44.08	9	15	44.9357	35.8	9	14	338
Q6XDA0	Erythroid spectrin beta OS=Rattus norvegicus GN=Sptb PE=2 SV=1 - [Q6XDA0_RAT]	20.22	1	28	29	50	246.176	5.31299	103.077	16.94	25	40	10.8143	4.45	6	6	4.61446	2.2	4	4	2137
Q5XIG4	OCIA domain-containing protein 1 OS=Rattus norvegicus GN=Ociad1 PE=1 SV=1 - [OCAD1_RAT]	32.39	1	6	6	49	27.6418	7.41553	31.0439	23.08	4	13	53.1442	32.39	6	19	41.6633	23.08	4	17	247
D3ZF13	Acyl carrier protein OS=Rattus norvegicus GN=LOC683884 PE=3 SV=1 - [D3ZF13_RAT]	23.72	2	6	6	49	17.5031	5.07178	64.1192	23.72	5	26	26.1497	23.72	4	10	33.2936	23.72	5	13	156
F1LMI8	Troponin T, cardiac muscle OS=Rattus norvegicus GN=Tnnt2 PE=2 SV=2 - [F1LMI8_RAT]	28.72	9	10	10	49	34.3444	5.32568					66.9007	25.95	8	23	81.4571	28.72	8	26	289
P62836	Ras-related protein Rap-1A OS=Rattus norvegicus GN=Rap1a PE=1 SV=1 - [RAP1A_RAT]	19.57	2	5	5	48	20.9737	6.66846	64.8598	19.57	4	25	32.4211	19.02	4	12	32.3501	13.59	3	11	184
Q5FVQ8	NLR family member X1 OS=Rattus norvegicus GN=Nlrx1 PE=2 SV=1 - [NLRX1_RAT]	29.6	1	20	20	48	107.522	7.56201	31.7502	15.01	10	14	40.317	15.42	11	17	31.519	20.35	13	17	973
Q4G069	Regulator of microtubule dynamics protein 1 OS=Rattus norvegicus GN=Rmdn1 PE=2 SV=1 - [RMD1_RAT]	29.35	1	9	9	48	35.3782	7.73779	45.9101	29.03	8	17	34.4732	25.81	8	16	30.4562	26.13	7	15	310
D4A8P9	Protein Iars2 OS=Rattus norvegicus GN=Iars2 PE=3 SV=2 - [D4A8P9_RAT]	30.54	1	10	10	48	48.6503	7.35693	57.3349	25.79	8	18	50.2335	27.38	9	18	32.3423	23.76	8	12	442
Q5XIG9	Mitochondrial protein 18 kDa OS=Rattus norvegicus GN=Mtfp1 PE=2 SV=1 - [Q5XIG9_RAT]	42.17	1	6	6	48	18.3547	9.45166	28.0621	41.57	5	11	58.8608	42.17	6	20	49.9043	42.17	6	17	166
Q7TQ85	Ac1164 OS=Rattus norvegicus GN=Pdhx PE=2 SV=1 - [Q7TQ85_RAT]	16.7	1	6	6	47	58.7599	8.52881	36.2416	15.21	5	18	33.0193	16.7	6	15	33.5341	10.02	4	14	539
D3Z9Z0	Ankyrin 1, erythroid OS=Rattus norvegicus GN=Ank1 PE=4 SV=1 - [D3Z9Z0_RAT]	15.06	1	16	16	46	187.008	6.69775	88.605	14.47	15	30	24.8206	4.39	5	8	16.4411	6.27	7	8	1707
F1LU71	AU RNA binding protein/enoyl-coenzyme A hydratase (Predicted), isoform CRA_a OS=Rattus norvegicus GN=Auh PE=3 SV=2 - [F1LU71_RAT]	34.29	1	8	8	46	33.32	9.42236	35.6236	17.78	5	12	54.2656	30.79	7	16	53.3394	34.29	8	18	315
F1M944	Calsequestrin OS=Rattus norvegicus GN=Casq2 PE=2 SV=1 - [F1M944_RAT]	18.64	2	7	7	46	47.8683	4.31006	44.748	15.25	5	16	53.5446	18.64	7	19	34.2314	12.83	4	11	413
P11960	2-oxoisovalerate dehydrogenase subunit alpha, mitochondrial (Fragment) OS=Rattus norvegicus GN=Bckdha PE=1 SV=1 - [ODBA_RAT]	35.6	2	10	10	45	50.1329	7.82568	66.34	25.4	7	27	24.9114	21.09	6	9	19.6217	15.42	4	9	441
B2RYW9	Fumarylacetoacetate hydrolase domain-containing protein 2 OS=Rattus norvegicus GN=Fahd2 PE=1 SV=1 - [FAHD2_RAT]	50.8	1	12	12	45	34.5591	8.35303	32.6075	33.23	7	13	51.7281	50.8	12	20	35.5743	24.92	6	12	313
P41350	Caveolin-1 OS=Rattus norvegicus GN=Cav1 PE=1 SV=3 - [CAV1_RAT]	24.16	3	3	3	44	20.5394	5.52881	39.2372	24.16	3	20	26.6158	24.16	3	10	30.038	24.16	3	14	178
D3ZS58	NADH dehydrogenase [ubiquinone] 1 alpha subcomplex subunit 2 OS=Rattus norvegicus GN=Ndufa2 PE=3 SV=1 - [D3ZS58_RAT]	57.73	1	8	8	44	10.8378	9.71533	21.3588	43.3	6	12	45.1949	50.52	6	18	34.0765	43.3	6	14	97
P07632	Superoxide dismutase [Cu-Zn] OS=Rattus norvegicus GN=Sod1 PE=1 SV=2 - [SODC_RAT]	32.47	1	4	4	41	15.9018	6.354	12.9384	32.47	4	9	32.5003	32.47	4	15	43.0415	32.47	4	17	154
P11608	ATP synthase protein 8 OS=Rattus norvegicus GN=Mt-atp8 PE=1 SV=1 - [ATP8_RAT]	34.33	3	2	2	41	7.63698	9.31982	33.6968	34.33	2	16	30.2085	34.33	2	14	24.2254	34.33	2	11	67
B0BNJ9	RCG44002, isoform CRA_a OS=Rattus norvegicus GN=Tmem14c PE=4 SV=1 - [B0BNJ9_RAT]	50	3	3	3	41	11.65	9.64209	83.6667	24.56	2	34	10.5828	50	3	4	5.16579	9.65	1	3	114
H9KVF5	NADH-ubiquinone oxidoreductase chain 3 (Fragment) OS=Rattus norvegicus GN=7066254 PE=3 SV=1 - [H9KVF5_RAT]	13.04	3	1	1	41	13.0599	4.43701	58.3868	13.04	1	16	48.4666	13.04	1	13	39.5757	13.04	1	12	115
P32198	Carnitine O-palmitoyltransferase 1, liver isoform OS=Rattus norvegicus GN=Cpt1a PE=1 SV=2 - [CPT1A_RAT]	6.99	1	3	5	40	88.0687	8.54346	30.7996	6.99	5	30	5.50345	2.72	2	3	16.4642	2.72	2	7	773
G3V945	Aldehyde dehydrogenase family 5, subfamily A1 OS=Rattus norvegicus GN=Aldh5a1 PE=3 SV=1 - [G3V945_RAT]	42.07	4	15	15	40	56.1099	8.08936	37.5605	26.77	9	13	31.888	26.58	9	13	31.4148	20.46	9	14	523
Q5I0M1	Apolipoprotein H OS=Rattus norvegicus GN=Apoh PE=2 SV=1 - [Q5I0M1_RAT]	31.01	2	9	9	40	38.4317	8.20654	59.8726	28.12	8	23	20.9317	17.97	4	7	22.782	17.97	5	10	345
P23693	Troponin I, cardiac muscle OS=Rattus norvegicus GN=Tnni3 PE=1 SV=2 - [TNNI3_RAT]	36.49	1	6	6	40	24.1447	9.5542					50.3516	36.49	6	21	45.3794	36.49	6	19	211
P24329	Thiosulfate sulfurtransferase OS=Rattus norvegicus GN=Tst PE=1 SV=3 - [THTR_RAT]	28.28	1	6	6	39	33.3858	7.85498	40.4573	28.28	6	13	47.4347	24.92	5	15	35.0311	24.92	5	11	297
Q6AYQ8	Acylpyruvase FAHD1, mitochondrial OS=Rattus norvegicus GN=Fahd1 PE=2 SV=1 - [FAHD1_RAT]	41.63	1	5	5	39	24.4646	7.73779	32.8872	34.39	4	11	55.1868	41.63	5	16	41.1689	41.63	5	12	221
P57113	Maleylacetoacetate isomerase OS=Rattus norvegicus GN=Gstz1 PE=1 SV=2 - [MAAI_RAT]	48.61	1	6	6	39	23.9456	7.76709	52.0874	41.67	5	14	37.798	40.74	5	11	45.0967	40.74	5	14	216
Q5HZA9	Transmembrane protein 126A OS=Rattus norvegicus GN=Tmem126a PE=2 SV=1 - [T126A_RAT]	42.35	1	6	6	38	21.6436	9.53955	25.3314	36.22	5	11	29.6384	42.35	6	14	30.0429	42.35	6	13	196
Q5XIA8	Growth hormone-inducible transmembrane protein OS=Rattus norvegicus GN=Ghitm PE=2 SV=1 - [GHITM_RAT]	9.54	1	4	4	38	37.1534	9.78857	67.6081	9.54	4	31	1.66405	3.18	1	1	15.9874	6.65	2	6	346
G3V640	Mitochondrial import inner membrane translocase subunit TIM44 OS=Rattus norvegicus GN=Timm44 PE=4 SV=1 - [G3V640_RAT]	22.3	2	8	8	37	51.0284	8.30908	49.4703	12.14	4	17	24.8847	13.69	5	10	29.8689	14.79	5	10	453
D4A197	Methylmalonyl CoA epimerase (Predicted), isoform CRA_d OS=Rattus norvegicus GN=Mcee PE=4 SV=1 - [D4A197_RAT]	42.13	1	4	4	36	18.8039	8.82178	22.5133	26.97	2	6	57.9724	42.13	4	17	46.7592	34.27	3	13	178
Q63862-3	Isoform 3 of Myosin-11 OS=Rattus norvegicus GN=Myh11 - [MYH11_RAT]	4.95	5	1	5	35	148.638	6.29053	10.6078	1.47	2	6	35.8321	4.95	5	18	24.0585	3.63	4	11	1293
Q63159	Hexaprenyldihydroxybenzoate methyltransferase, mitochondrial OS=Rattus norvegicus GN=Coq3 PE=2 SV=2 - [COQ3_RAT]	24.64	1	6	6	34	38.6836	7.97217	18.5009	12.75	3	8	41.0271	17.1	4	13	41.4015	21.45	5	13	345
D4A9W3	Protein RGD1311756 OS=Rattus norvegicus GN=RGD1311756 PE=4 SV=1 - [D4A9W3_RAT]	22.65	1	11	11	34	66.0141	6.68311	32.6978	18.12	9	12	17.4179	13.43	6	8	30.2974	17.96	8	14	618
F1LMM9	Elongation factor G, mitochondrial OS=Rattus norvegicus GN=Gfm1 PE=2 SV=1 - [F1LMM9_RAT]	27.27	2	15	15	34	83.2595	7.1665	40.8533	23.4	12	17	16.5384	11.9	7	7	21.7066	12.17	6	10	748
P08050	Gap junction alpha-1 protein OS=Rattus norvegicus GN=Gja1 PE=1 SV=2 - [CXA1_RAT]	12.3	1	5	5	33	43.0039	8.76318	40.1338	12.3	5	20	7.60768	8.12	3	7	13.3114	8.12	3	6	382
P04166	Cytochrome b5 type B OS=Rattus norvegicus GN=Cyb5b PE=1 SV=2 - [CYB5B_RAT]	46.58	1	5	5	32	16.2548	5.05908	18.9468	18.49	3	7	49.419	37.67	4	16	34.6177	37.67	4	9	146
Q4G064	2-methoxy-6-polyprenyl-1,4-benzoquinol methylase, mitochondrial OS=Rattus norvegicus GN=Coq5 PE=2 SV=1 - [COQ5_RAT]	36.39	1	9	9	32	37.2771	8.80713	30.1816	36.39	8	12	25.1279	16.82	5	11	20.9874	25.99	6	9	327
Q5U2X7	Mitochondrial import inner membrane translocase subunit Tim21 OS=Rattus norvegicus GN=Timm21 PE=2 SV=1 - [TIM21_RAT]	24.08	2	5	5	31	27.8587	9.99365	14.6528	15.1	3	8	20.9027	18.78	4	10	27.7984	18.37	4	13	245
P0C546	Mitochondrial coenzyme A transporter SLC25A42 OS=Rattus norvegicus GN=Slc25a42 PE=2 SV=1 - [S2542_RAT]	26.1	1	5	5	31	35.0775	9.86182	19.0385	13.21	3	8	34.3524	20.13	4	12	28.5396	23.27	4	11	318
Q642A4	UPF0598 protein C8orf82 homolog OS=Rattus norvegicus PE=2 SV=1 - [CH082_RAT]	45.87	1	6	6	30	24.3813	8.5874	28.5626	36.7	5	12	27.8939	36.7	5	10	24.0241	45.87	6	8	218
D3ZJX5	Protein Timm50 OS=Rattus norvegicus GN=LOC687295 PE=4 SV=2 - [D3ZJX5_RAT]	28.61	1	8	8	30	39.8297	8.1333	23.7748	15.58	4	8	26.1468	23.51	6	10	32.907	28.61	8	12	353
Q5XIM0	BCS1-like (Yeast) OS=Rattus norvegicus GN=Bcs1l PE=2 SV=1 - [Q5XIM0_RAT]	6.94	1	2	2	30	47.3633	8.23584	42.4103	6.94	2	14	17.9456	6.94	2	8	20.9091	4.55	1	8	418
F1LNV4	ATP-binding cassette sub-family B member 7, mitochondrial OS=Rattus norvegicus GN=Abcb7 PE=2 SV=2 - [F1LNV4_RAT]	20.48	2	12	12	29	82.703	9.29053	47.0826	16.36	10	22	5.05179	3.99	2	2	7.66242	5.85	3	5	752
P21571	ATP synthase-coupling factor 6, mitochondrial OS=Rattus norvegicus GN=Atp5j PE=1 SV=1 - [ATP5J_RAT]	44.44	1	5	5	28	12.4866	9.43701	9.11671	21.3	1	3	50.7851	44.44	4	14	36.7417	44.44	5	11	108
P97576	GrpE protein homolog 1, mitochondrial OS=Rattus norvegicus GN=Grpel1 PE=1 SV=2 - [GRPE1_RAT]	29.49	1	5	5	28	24.2819	8.38232	24.3894	21.66	4	10	24.0789	25.35	4	8	25.3516	29.49	5	10	217
Q4FZT8	SPRY domain-containing protein 4 OS=Rattus norvegicus GN=Spryd4 PE=2 SV=1 - [SPRY4_RAT]	41.06	1	7	7	28	23.2351	9.34912	26.0436	20.29	4	11	12.0868	36.23	6	8	15.6317	36.23	6	9	207
D3ZC50	Uncharacterized protein OS=Rattus norvegicus PE=4 SV=1 - [D3ZC50_RAT]	8.77	1	1	2	28	20.1091	7.97217	30.7864	7.02	1	11	25.499	8.77	2	9	22.6353	8.77	2	8	171
P49134	Integrin beta-1 OS=Rattus norvegicus GN=Itgb1 PE=2 SV=1 - [ITB1_RAT]	11.14	1	6	6	27	88.4364	6.07471	15.9494	9.64	5	6	33.8685	11.14	6	12	21.2554	9.64	5	9	799
Q6IG02	Keratin, type II cytoskeletal 2 epidermal OS=Rattus norvegicus GN=Krt2 PE=2 SV=1 - [K22E_RAT]	3.65	2	1	2	27	69.0852	7.69385	13.5493	2.04	1	6	29.4426	3.65	2	10	25.4718	3.65	2	11	685
Q9WVJ4	Synaptojanin-2-binding protein OS=Rattus norvegicus GN=Synj2bp PE=1 SV=2 - [SYJ2B_RAT]	36.55	1	4	4	27	15.8153	6.80029	9.83683	25.52	3	5	26.0102	25.52	3	12	26.2429	36.55	4	10	145
D4A786	Protein LOC100360002 OS=Rattus norvegicus GN=LOC100362685 PE=4 SV=1 - [D4A786_RAT]	18.97	3	2	2	27	6.37736	9.83252	17.9571	18.97	2	12	19.5261	18.97	2	9	11.1467	18.97	2	6	58
P41562	Isocitrate dehydrogenase [NADP] cytoplasmic OS=Rattus norvegicus GN=Idh1 PE=1 SV=1 - [IDHC_RAT]	4.83	1	1	2	26	46.7045	6.99072	22.2567	4.83	2	12	11.6878	2.17	1	7	12.399	2.17	1	7	414
D3ZYX8	Cytochrome c oxidase subunit VIIa polypeptide 2 like (Predicted), isoform CRA_e OS=Rattus norvegicus GN=Cox7a2l PE=4 SV=1 - [D3ZYX8_RAT]	28.33	1	3	3	26	13.265	9.74463	16.7173	28.33	3	7	23.4657	28.33	3	12	18.6414	20.83	2	7	120
D4A4P3	Protein LOC100361144 OS=Rattus norvegicus GN=LOC100361144 PE=4 SV=1 - [D4A4P3_RAT]	28.28	2	2	2	26	11.2596	9.0415	31.3924	28.28	2	14	12.0428	11.11	1	6	9.75043	11.11	1	6	99
P20070-3	Isoform 3 of NADH-cytochrome b5 reductase 3 OS=Rattus norvegicus GN=Cyb5r3 - [NB5R3_RAT]	43.88	3	9	9	26	31.5713	8.14795	14.354	15.11	3	6	27.7301	39.57	7	9	31.6379	31.65	7	11	278
Q68FU7	Ubiquinone biosynthesis monooxygenase COQ6 OS=Rattus norvegicus GN=Coq6 PE=2 SV=1 - [COQ6_RAT]	18.91	1	8	8	26	51.4631	7.21045	20.6182	12.61	6	10	21.2081	16.81	6	9	18.6868	13.24	5	7	476
P42123	L-lactate dehydrogenase B chain OS=Rattus norvegicus GN=Ldhb PE=1 SV=2 - [LDHB_RAT]	26.65	2	6	7	25	36.5891	6.04932	22.3085	23.35	6	9	13.473	23.65	6	7	20.7868	21.56	6	9	334
P70584	Short/branched chain specific acyl-CoA dehydrogenase, mitochondrial OS=Rattus norvegicus GN=Acadsb PE=1 SV=1 - [ACDSB_RAT]	13.66	1	4	4	25	47.7933	8.06006	38.4753	11.34	3	11	24.7713	9.26	2	7	21.6545	13.66	4	7	432
P04762	Catalase OS=Rattus norvegicus GN=Cat PE=1 SV=3 - [CATA_RAT]	40.23	1	14	14	25	59.7195	7.50342	45.2412	37.95	13	17	10.3266	10.44	4	4	12.0786	8.73	3	4	527
P70470	Acyl-protein thioesterase 1 OS=Rattus norvegicus GN=Lypla1 PE=1 SV=1 - [LYPA1_RAT]	20	1	4	4	25	24.6923	6.50732	28.9242	20	4	14	14.9297	20	4	6	11.551	16.52	3	5	230
Q5XIJ4	Protein FAM210A OS=Rattus norvegicus GN=Fam210a PE=2 SV=1 - [F210A_RAT]	18.68	1	4	4	25	31.4546	9.81787	29.542	18.68	4	11	23.6258	14.29	3	9	15.7414	10.26	2	5	273
Q5RKI8	ATP-binding cassette sub-family B member 8, mitochondrial OS=Rattus norvegicus GN=Abcb8 PE=2 SV=1 - [ABCB8_RAT]	17.65	1	8	9	25	77.7211	9.5249	29.065	16.11	8	12	17.6237	10.5	5	7	17.3401	6.86	4	6	714
D4ADG2	Protein Iba57 OS=Rattus norvegicus GN=Iba57 PE=3 SV=1 - [D4ADG2_RAT]	30.73	2	7	7	25	38.6491	9.12939	20.6792	28.21	6	7	29.6345	30.73	7	9	29.5992	30.73	6	9	358
F1MA54	3-phosphoinositide-dependent protein kinase 1 OS=Rattus norvegicus GN=Pdk1 PE=2 SV=2 - [F1MA54_RAT]	18.89	2	6	6	25	49.0678	8.00146	22.4588	16.36	5	9	16.2663	11.98	4	7	16.9722	11.52	4	9	434
Q6P7Q2	Glypican-1 OS=Rattus norvegicus GN=Gpc1 PE=2 SV=1 - [Q6P7Q2_RAT]	26.88	2	9	9	25	61.5898	7.21045	35.173	23.66	8	12	26.8155	18.46	6	10	3.64551	8.96	3	3	558
Q75Q41	Mitochondrial import receptor subunit TOM22 homolog OS=Rattus norvegicus GN=Tomm22 PE=1 SV=1 - [TOM22_RAT]	45.07	1	4	4	24	15.4808	4.33545	15.7959	16.2	2	8	21.7701	37.32	3	7	28.8963	45.07	4	9	142
P05503	Cytochrome c oxidase subunit 1 OS=Rattus norvegicus GN=Mtco1 PE=2 SV=2 - [COX1_RAT]	7.59	3	3	3	24	56.899	6.80029	51.7489	7.59	3	21	4.6425	2.72	1	2	0	1.56	1	1	514
P06761	78 kDa glucose-regulated protein OS=Rattus norvegicus GN=Hspa5 PE=1 SV=1 - [GRP78_RAT]	22.17	3	9	11	24	72.3024	5.16064	36.5687	20.34	10	14	18.1537	12.69	6	6	11.1434	8.56	4	4	654
Q64057	Alpha-aminoadipic semialdehyde dehydrogenase OS=Rattus norvegicus GN=Aldh7a1 PE=1 SV=2 - [AL7A1_RAT]	13.54	1	5	5	24	58.7114	7.86963	19.301	11.5	4	7	20.0137	11.5	4	8	17.4709	13.54	5	9	539
Q6PCU8	NADH dehydrogenase [ubiquinone] flavoprotein 3, mitochondrial OS=Rattus norvegicus GN=Ndufv3 PE=3 SV=1 - [NDUV3_RAT]	48.15	1	2	4	24	11.9343	9.40771	17.1789	38.89	2	5	35.5678	38.89	3	10	28.584	48.15	3	9	108
D3ZX74	Coenzyme Q10 homolog A (Yeast) (Predicted), isoform CRA_b OS=Rattus norvegicus GN=Coq10a PE=4 SV=1 - [D3ZX74_RAT]	22.58	1	4	4	24	24.6825	8.93896	26.3318	22.58	4	12	8.72939	14.75	3	7	8.82139	22.58	4	5	217
P11662	NADH-ubiquinone oxidoreductase chain 2 OS=Rattus norvegicus GN=Mtnd2 PE=2 SV=2 - [NU2M_RAT]	10.14	3	3	3	23	38.5168	9.89111	59.7768	10.14	3	21	1.85994	2.61	1	1	2.0914	2.61	1	1	345
P24473	Glutathione S-transferase kappa 1 OS=Rattus norvegicus GN=Gstk1 PE=1 SV=3 - [GSTK1_RAT]	30.53	1	5	5	23	25.4763	9.0708	34.7584	19.91	3	13	17.4594	19.47	3	6	10.8214	22.12	3	4	226
Q3KRE0	ATPase family AAA domain-containing protein 3 OS=Rattus norvegicus GN=Atad3 PE=1 SV=1 - [ATAD3_RAT]	17.94	1	9	9	23	66.7175	9.29053	21.8768	12.52	7	9	21.4992	14.38	6	9	11.1679	4.91	3	5	591
B2RZ37	Receptor expression-enhancing protein 5 OS=Rattus norvegicus GN=Reep5 PE=1 SV=1 - [REEP5_RAT]	5.29	1	1	1	23	21.417	8.11865	1.77977	5.29	1	1	3.87137	5.29	1	2	31.7574	5.29	1	20	189
D3ZDE4	Deoxyguanosine kinase (Predicted), isoform CRA_a OS=Rattus norvegicus GN=Dguok PE=4 SV=1 - [D3ZDE4_RAT]	30.22	1	6	6	23	32.2073	7.95752	15.7883	20.14	4	6	23.7283	30.22	6	10	15.6562	15.47	3	7	278
D3ZUL3	Protein Col6a1 OS=Rattus norvegicus GN=Col6a1 PE=4 SV=1 - [D3ZUL3_RAT]	7.02	2	6	6	23	108.738	5.36377	10.2225	4.1	4	5	25.9708	7.02	6	10	20.8921	5.66	5	8	1025
D4AB01	Histidine triad nucleotide binding protein 2 (Predicted), isoform CRA_a OS=Rattus norvegicus GN=Hint2 PE=4 SV=1 - [D4AB01_RAT]	31.9	1	3	3	23	17.3693	9.42236	17.289	21.47	2	5	40.9116	31.9	3	11	26.2951	22.7	2	7	163
M0RDK9	Protein Acad8 (Fragment) OS=Rattus norvegicus GN=Acad8 PE=3 SV=1 - [M0RDK9_RAT]	28.94	1	7	7	23	33.2806	8.39697	31.6709	28.94	7	14	12.2676	17.68	4	5	9.84914	10.29	3	4	311
P80432	Cytochrome c oxidase subunit 7C, mitochondrial OS=Rattus norvegicus GN=Cox7c PE=1 SV=2 - [COX7C_RAT]	31.75	1	2	2	23	7.36993	11.0044					12.2868	31.75	2	7	25.061	31.75	2	16	63
P01946	Hemoglobin subunit alpha-1/2 OS=Rattus norvegicus GN=Hba1 PE=1 SV=3 - [HBA_RAT]	45.77	1	4	4	22	15.3188	7.97217	19.7592	37.32	3	8	28.8216	37.32	3	9	16.9528	30.28	3	5	142
P05505	Cytochrome c oxidase subunit 3 OS=Rattus norvegicus GN=Mtco3 PE=1 SV=5 - [COX3_RAT]	5.36	2	1	1	22	29.8512	7.13721	38.7351	5.36	1	20	2.07091	5.36	1	1	0	5.36	1	1	261
D3ZEH6	Protein Nudt8 OS=Rattus norvegicus GN=Nudt8 PE=4 SV=1 - [D3ZEH6_RAT]	35.24	1	6	6	22	23.0781	6.93213	19.7523	28.57	4	8	18.0206	29.52	5	6	25.2467	35.24	6	8	210
D3ZXK4	Protein Abhd11 OS=Rattus norvegicus GN=Abhd11 PE=4 SV=1 - [D3ZXK4_RAT]	24.76	1	6	6	22	33.1953	9.30518	11.2604	16.29	4	5	23.6451	19.87	5	9	23.4097	24.76	6	8	307
M0RCB1	Uncharacterized protein OS=Rattus norvegicus PE=3 SV=1 - [M0RCB1_RAT]	17.32	11	7	9	22	70.386	5.59229	26.4213	15.44	7	13	4.32533	6.08	3	3	14.4486	10.14	5	6	641
P02091	Hemoglobin subunit beta-1 OS=Rattus norvegicus GN=Hbb PE=1 SV=3 - [HBB1_RAT]	61.22	3	2	7	21	15.9692	8.07471	22.6242	53.74	6	12	14.8052	44.22	5	5	8.61376	23.81	3	4	147
O88989	Malate dehydrogenase, cytoplasmic OS=Rattus norvegicus GN=Mdh1 PE=1 SV=3 - [MDHC_RAT]	20.36	1	5	5	21	36.46	6.58057	31.2203	20.36	5	11	7.96496	10.78	3	4	13.36	14.37	4	6	334
D3ZIL6	Enoyl Coenzyme A hydratase domain containing 2 (Predicted), isoform CRA_a OS=Rattus norvegicus GN=Echdc2 PE=3 SV=1 - [D3ZIL6_RAT]	26.01	1	5	5	21	31.7588	9.33447	15.0627	10.81	2	5	25.1597	14.19	3	8	23.6169	22.64	4	8	296
D4A0Y4	Oxidoreductase NAD-binding domain containing 1 (Predicted), isoform CRA_b OS=Rattus norvegicus GN=Oxnad1 PE=4 SV=1 - [D4A0Y4_RAT]	20.96	1	5	5	21	37.4034	8.96826	16.0647	17.07	4	7	19.2521	15.87	4	7	21.1962	15.87	4	7	334
D4A6X1	Dysferlin (Predicted), isoform CRA_a OS=Rattus norvegicus GN=Dysf PE=4 SV=2 - [D4A6X1_RAT]	6.55	1	9	9	21	230.825	5.68115	42.4981	6.11	8	13	17.0241	0.84	1	4	10.2666	1.92	3	4	2029
F1LQZ0	Protein Tmem65 OS=Rattus norvegicus GN=Tmem65 PE=2 SV=1 - [F1LQZ0_RAT]	22.39	1	5	5	21	27.7156	8.104	15.5177	8.49	2	6	19.8154	17.76	4	8	17.5832	22.39	5	7	259
F1LVY9	Protein Pdf OS=Rattus norvegicus GN=Pdf PE=3 SV=2 - [F1LVY9_RAT]	42.42	1	7	7	21	25.8626	9.26123	31.5604	24.24	4	11	11.3692	27.71	5	5	14.5144	29.44	4	5	231
P04182	Ornithine aminotransferase, mitochondrial OS=Rattus norvegicus GN=Oat PE=1 SV=1 - [OAT_RAT]	25.51	2	6	6	20	48.302	6.99072	22.1571	10.02	3	8	13.5479	10.25	3	5	16.2341	18	4	7	439
Q497B0	Omega-amidase NIT2 OS=Rattus norvegicus GN=Nit2 PE=1 SV=1 - [NIT2_RAT]	57.25	1	10	10	20	30.6817	7.29834	19.2371	30.8	7	8	26.4743	39.86	6	8	11.3292	12.68	3	4	276
Q6IG00	Keratin, type II cytoskeletal 4 OS=Rattus norvegicus GN=Krt4 PE=2 SV=1 - [K2C4_RAT]	8.4	4	1	5	20	57.631	7.63525	7.86828	1.49	1	4	13.9984	7.46	4	6	22.2554	8.4	4	10	536
Q3MIE0	Enoyl-CoA hydratase domain-containing protein 3, mitochondrial OS=Rattus norvegicus GN=Echdc3 PE=2 SV=1 - [ECHD3_RAT]	42.33	2	9	9	20	32.3649	8.57275	6.30767	10	3	3	22.7012	30.67	6	7	25.871	36.33	6	10	300
B0BNM1	NAD(P)H-hydrate epimerase OS=Rattus norvegicus GN=Apoa1bp PE=2 SV=1 - [NNRE_RAT]	16.31	1	3	3	20	30.8707	6.88818	18.3699	16.31	3	7	17.3759	16.31	3	6	21.7876	16.31	3	7	282
Q920F5-2	Isoform Cytoplasmic+peroxisomal of Malonyl-CoA decarboxylase, mitochondrial OS=Rattus norvegicus GN=Mlycd - [DCMC_RAT]	20.04	2	7	7	20	50.653	7.69385	24.0807	20.04	7	11	10.7048	8.37	3	3	17.2805	11.23	4	6	454
O08776-4	Isoform 4 of NADH dehydrogenase [ubiquinone] 1 alpha subcomplex assembly factor 3 OS=Rattus norvegicus GN=Ndufaf3 - [NDUF3_RAT]	36.87	4	4	4	20	19.851	7.84033					28.7954	23.46	3	10	31.2832	30.73	3	10	179
P00159	Cytochrome b OS=Rattus norvegicus GN=Mt-Cyb PE=2 SV=2 - [CYB_RAT]	2.37	3	1	1	19	42.9698	7.98682	37.4273	2.37	1	14	2.58106	2.37	1	1	9.49303	2.37	1	4	380
P52504	NADH dehydrogenase [ubiquinone] iron-sulfur protein 6, mitochondrial OS=Rattus norvegicus GN=Ndufs6 PE=3 SV=1 - [NDUS6_RAT]	31.9	1	1	3	19	12.7746	9.24658	19.0783	31.9	3	7	18.7404	31.9	3	6	17.9072	21.55	2	6	116
P34058	Heat shock protein HSP 90-beta OS=Rattus norvegicus GN=Hsp90ab1 PE=1 SV=4 - [HS90B_RAT]	5.25	5	1	3	19	83.2291	5.03369	13.061	3.59	2	4	25.0806	5.25	3	9	14.1432	5.25	3	6	724
P23928	Alpha-crystallin B chain OS=Rattus norvegicus GN=Cryab PE=1 SV=1 - [CRYAB_RAT]	32	1	5	5	19	20.0763	7.32764	17.598	13.71	2	7	11.24	21.14	3	6	11.3497	25.71	4	6	175
P0C089	Phosphatidylglycerophosphatase and protein-tyrosine phosphatase 1 OS=Rattus norvegicus GN=Ptpmt1 PE=2 SV=1 - [PTPM1_RAT]	37.82	2	6	6	19	21.8725	9.5835	14.8116	17.62	4	8	11.8642	11.4	2	5	15.7532	26.94	3	6	193
Q5U3Z3	Isochorismatase domain-containing protein 2, mitochondrial OS=Rattus norvegicus GN=Isoc2 PE=2 SV=1 - [ISOC2_RAT]	20	1	2	2	19	23.1423	7.82568	31.4609	20	2	10	13.8515	20	2	5	14.4327	20	2	4	210
Q6MGB5	Estradiol 17-beta-dehydrogenase 8 OS=Rattus norvegicus GN=Hsd17b8 PE=3 SV=1 - [DHB8_RAT]	36.68	1	6	6	19	26.7738	6.55127	10.2714	10.42	2	4	25.1381	31.66	5	8	21.2217	20.46	4	7	259
F1LMM8	[Pyruvate dehydrogenase [lipoamide]] kinase isozyme 2, mitochondrial OS=Rattus norvegicus GN=Pdk2 PE=2 SV=2 - [F1LMM8_RAT]	22.19	2	5	5	19	43.9902	7.35693	25.6322	18.88	4	9	16.1082	10.71	3	6	10.753	10.71	3	4	392
Q9WVK3	Peroxisomal trans-2-enoyl-CoA reductase OS=Rattus norvegicus GN=Pecr PE=2 SV=1 - [PECR_RAT]	41.58	1	8	8	18	32.4126	8.68994	12.5202	28.71	5	6	22.1101	41.25	7	8	9.00808	13.86	3	4	303
Q5I0P2	Glycine cleavage system H protein, mitochondrial OS=Rattus norvegicus GN=Gcsh PE=2 SV=1 - [GCSH_RAT]	30	1	4	4	18	18.4734	5.0083	14.1106	27.65	3	5	13.8882	23.53	2	4	23.5054	30	3	9	170
Q9WTQ2	Podocalyxin OS=Rattus norvegicus GN=Podxl PE=1 SV=2 - [PODXL_RAT]	13.61	1	5	5	18	51.6267	4.90674	15.8951	11.34	4	7	18.4698	13.4	4	7	10.0984	9.07	2	4	485
D3ZN43	NADH dehydrogenase (ubiquinone) complex I, assembly factor 6 OS=Rattus norvegicus GN=Ndufaf6 PE=3 SV=1 - [NDUF6_RAT]	12.91	1	4	4	18	38.4911	9.62744	2.08706	6.01	1	1	27.6804	12.91	4	9	18.7165	12.91	4	8	333
B0BN86	Transmembrane protein 11, mitochondrial OS=Rattus norvegicus GN=Tmem11 PE=2 SV=1 - [TMM11_RAT]	18.42	2	3	3	18	21.3279	7.35693	7.87038	18.42	3	4	23.7458	18.42	3	8	15.618	18.42	3	6	190
B2RYT9	Translational activator of cytochrome c oxidase 1 OS=Rattus norvegicus GN=Taco1 PE=2 SV=1 - [TACO1_RAT]	29.49	2	5	5	18	32.7337	7.92822	10.8891	10.17	2	4	17.5514	19.32	3	6	22.7593	29.49	5	8	295
B2RZ31	Protein Sirt3 OS=Rattus norvegicus GN=Sirt3 PE=2 SV=1 - [B2RZ31_RAT]	33.85	1	6	6	18	28.4788	5.8335	7.48203	15.18	3	3	18.2083	29.57	5	8	21.9141	23.35	4	7	257
D3Z9L0	Protein Agk OS=Rattus norvegicus GN=Agk PE=4 SV=1 - [D3Z9L0_RAT]	13.54	1	4	4	18	46.7391	8.25049	17.0252	11.88	3	6	14.5205	13.54	4	6	16.5451	8.79	2	6	421
D3ZKE6	Sarcolemma associated protein (Predicted) OS=Rattus norvegicus GN=Slmap PE=4 SV=1 - [D3ZKE6_RAT]	7.75	2	7	7	18	90.504	5.19873	22.4552	6.35	5	8	14.699	6.35	4	5	13.9646	3.68	3	5	787
F1LNH3	Procollagen, type VI, alpha 2, isoform CRA_a OS=Rattus norvegicus GN=Col6a2 PE=4 SV=2 - [F1LNH3_RAT]	10.91	1	7	7	18	109.591	6.60986	8.20402	4.58	3	3	29.2852	9.93	6	10	12.9649	5.06	4	5	1027
M0R5K3	Protein LOC100910772 OS=Rattus norvegicus GN=LOC100910772 PE=4 SV=1 - [M0R5K3_RAT]	16.25	2	1	1	18	9.02169	10.0083	25.0898	16.25	1	9	13.0659	16.25	1	4	16.1066	16.25	1	5	80
P84817-3	Isoform 3 of Mitochondrial fission 1 protein OS=Rattus norvegicus GN=Fis1 - [FIS1_RAT]	33.79	3	4	4	18	16.2405	9.24658	2.54653	7.59	1	1	21.8565	33.79	4	7	29.2967	33.79	4	10	145
P61589	Transforming protein RhoA OS=Rattus norvegicus GN=Rhoa PE=1 SV=1 - [RHOA_RAT]	32.12	3	4	4	17	21.7681	6.1001	20.4028	19.69	3	7	12.309	13.47	2	5	11.0644	25.91	3	5	193
D3ZCA0	Proline synthetase co-transcribed (Predicted) OS=Rattus norvegicus GN=Prosc PE=3 SV=1 - [D3ZCA0_RAT]	30.91	1	5	5	17	30.0856	7.92822	5.49998	10.55	2	3	18.665	30.91	5	7	22.7134	30.91	5	7	275
D3ZFR9	Protein Rdh13 OS=Rattus norvegicus GN=Rdh13 PE=3 SV=1 - [D3ZFR9_RAT]	30.24	1	6	6	17	36.385	8.86572	24.8377	20.06	4	8	17.8101	26.65	5	5	14.8024	12.28	3	4	334
D3ZYU4	Protein Cox20 OS=Rattus norvegicus GN=Cox20 PE=4 SV=1 - [D3ZYU4_RAT]	42.74	1	4	4	17	13.0698	9.01221	10.8975	31.62	2	4	18.2779	42.74	4	9	11.0851	31.62	2	4	117
D4ADD7	Glutaredoxin 5 homolog (S. cerevisiae) (Predicted), isoform CRA_b OS=Rattus norvegicus GN=Glrx5 PE=4 SV=1 - [D4ADD7_RAT]	29.61	1	3	3	17	16.4215	7.28369	13.5876	21.71	2	6	15.7466	21.71	2	4	27.7929	29.61	3	7	152
G3V6I5	Protein Dnaja3 OS=Rattus norvegicus GN=Dnaja3 PE=3 SV=1 - [G3V6I5_RAT]	11.67	1	4	4	17	52.3704	9.27588	14.4849	8.33	3	7	12.4722	3.54	2	5	11.8395	11.67	4	5	480
M0R4E1	Myosin light chain 4 OS=Rattus norvegicus GN=Myl4 PE=4 SV=1 - [M0R4E1_RAT]	12.44	2	1	2	17	21.2406	5.03369	6.67167	5.7	1	3	17.8118	12.44	2	6	20.8161	12.44	2	8	193
M0R660	Protein RGD1565368 OS=Rattus norvegicus GN=RGD1565368 PE=3 SV=1 - [M0R660_RAT]	21.02	23	4	4	17	35.7601	8.25049	38.1159	21.02	4	12	8.15844	4.2	1	3	4.81287	4.2	1	2	333
Q3V5X8	Endonuclease G OS=Rattus norvegicus GN=Endog PE=2 SV=1 - [Q3V5X8_RAT]	33.33	1	8	8	17	32.2478	9.51025	2.20016	4.42	1	1	21.0936	28.91	7	8	18.5176	25.17	6	8	294
P18297	Sepiapterin reductase OS=Rattus norvegicus GN=Spr PE=1 SV=1 - [SPRE_RAT]	18.7	1	3	3	16	28.1105	5.70654	11.1286	13.74	2	4	20.6026	12.98	2	6	18.3356	8.02	1	6	262
P62076	Mitochondrial import inner membrane translocase subunit Tim13 OS=Rattus norvegicus GN=Timm13 PE=3 SV=1 - [TIM13_RAT]	53.68	1	5	5	16	10.4509	8.17725	9.23967	14.74	1	3	16.2462	36.84	3	6	21.2819	43.16	4	7	95
P35571	Glycerol-3-phosphate dehydrogenase, mitochondrial OS=Rattus norvegicus GN=Gpd2 PE=1 SV=1 - [GPDM_RAT]	13.48	2	8	8	16	80.9213	6.62451	19.4231	8.67	5	9	3.05905	4.13	2	2	4.84919	6.6	4	5	727
Q9WV97	Mitochondrial import inner membrane translocase subunit Tim9 OS=Rattus norvegicus GN=Timm9 PE=1 SV=3 - [TIM9_RAT]	34.83	1	3	3	16	10.3691	7.21045	5.11969	12.36	1	2	18.8051	34.83	3	7	20.2822	34.83	3	7	89
Q5M9G9	Protein TBRG4 OS=Rattus norvegicus GN=Tbrg4 PE=2 SV=1 - [TBRG4_RAT]	17.01	1	8	8	16	71.1357	8.36768	7.84994	7.79	4	4	15.2784	15.58	7	9	4.79187	6.36	3	3	629
A0JPQ4	Tripartite motif-containing protein 72 OS=Rattus norvegicus GN=Trim72 PE=2 SV=1 - [TRI72_RAT]	24.32	1	9	9	16	52.7978	6.26514	17.3671	18.24	7	9	11.4811	14.68	5	6	1.82822	1.89	1	1	477
P85972	Vinculin OS=Rattus norvegicus GN=Vcl PE=1 SV=1 - [VINC_RAT]	10.04	2	8	8	16	116.542	6.0874	16.4294	6.66	5	6	8.40299	2.25	2	4	13.164	6.94	6	6	1066
D3ZFZ1	Protein Zfp157 OS=Rattus norvegicus GN=Zfp157 PE=4 SV=1 - [D3ZFZ1_RAT]	1.41	1	1	1	16	66.3741	8.47021	5.24423	1.41	1	12	0	1.41	1	2	1.68793	1.41	1	2	568
D3ZGM1	Protein Ptcd3 OS=Rattus norvegicus GN=Ptcd3 PE=2 SV=1 - [D3ZGM1_RAT]	16.3	1	7	7	16	77.8418	6.20166	17.0654	11.79	5	6	15.4827	10.04	4	6	9.7287	6.99	3	4	687
F1LYI7	Protein RGD1563438 OS=Rattus norvegicus GN=LOC100913000 PE=4 SV=2 - [F1LYI7_RAT]	29.2	1	2	2	16	11.7681	8.90967	42.7591	29.2	2	10	12.6812	24.78	1	3	13.1348	24.78	1	3	113
F7F744	Plectin OS=Rattus norvegicus GN=Plec PE=4 SV=1 - [F7F744_RAT]	2.86	7	10	10	16	517.088	5.75732	0	0.26	1	1	9.5441	1.41	4	6	17.8681	2.38	8	9	4544
G3V6H0	Protein LOC100363782 OS=Rattus norvegicus GN=LOC100363782 PE=3 SV=1 - [G3V6H0_RAT]	27.36	25	2	4	16	22.1632	5.73193	27.4433	19.4	3	11	3.19523	7.96	1	1	8.25769	13.43	2	4	201
M0RDM4	Histone H2A OS=Rattus norvegicus GN=LOC680322 PE=3 SV=1 - [M0RDM4_RAT]	27.34	17	1	3	16	14.0599	11.0337					21.2559	21.88	2	7	21.1379	27.34	3	9	128
Q641Z6	EH domain-containing protein 1 OS=Rattus norvegicus GN=Ehd1 PE=1 SV=1 - [EHD1_RAT]	16.29	2	5	6	15	60.5646	6.82959	19.1885	13.3	4	6	11.887	8.43	3	4	15.819	8.61	4	5	534
P24268	Cathepsin D OS=Rattus norvegicus GN=Ctsd PE=1 SV=1 - [CATD_RAT]	18.67	2	5	5	15	44.6519	7.09326	14.3023	14.25	4	9	7.37367	9.34	2	4	5.48384	7.37	2	2	407
Q62760	Mitochondrial import receptor subunit TOM20 homolog OS=Rattus norvegicus GN=Tomm20 PE=1 SV=2 - [TOM20_RAT]	31.03	1	3	3	15	16.2736	8.60205	7.76303	13.79	1	2	9.50614	22.07	2	4	28.4969	31.03	3	9	145
P11517	Hemoglobin subunit beta-2 OS=Rattus norvegicus PE=1 SV=2 - [HBB2_RAT]	45.58	3	1	6	15	15.9723	8.79248	12.4264	38.1	5	9	7.19834	22.45	3	3	6.21204	14.97	2	3	147
P54311	Guanine nucleotide-binding protein G(I)/G(S)/G(T) subunit beta-1 OS=Rattus norvegicus GN=Gnb1 PE=1 SV=4 - [GBB1_RAT]	9.41	5	3	3	15	37.353	5.99854	13.1782	5.88	2	7	9.28928	9.41	3	4	6.50583	9.41	3	4	340
Q6NYB7	Ras-related protein Rab-1A OS=Rattus norvegicus GN=Rab1A PE=1 SV=3 - [RAB1A_RAT]	26.83	25	2	4	15	22.6634	6.21436	23.5414	26.83	4	10	4.78373	7.8	1	2	6.02465	13.17	2	3	205
F1M8L6	Protein Ndufa3 OS=Rattus norvegicus GN=Ndufa3 PE=2 SV=1 - [F1M8L6_RAT]	28.57	2	1	1	15	9.3798	8.49951	20.6482	28.57	1	11	2.06521	28.57	1	1	2.30924	28.57	1	3	84
F1MAA7	Protein Lamc1 OS=Rattus norvegicus GN=Lamc1 PE=4 SV=1 - [F1MAA7_RAT]	3.98	1	5	5	15	177.273	5.22412	2.25321	1.43	2	2	11.7053	2.61	3	6	13.4664	2.05	3	7	1607
Q9Z1N4	3'(2'),5'-bisphosphate nucleotidase 1 OS=Rattus norvegicus GN=Bpnt1 PE=1 SV=1 - [BPNT1_RAT]	26.3	1	6	6	14	33.1531	5.87158	10.4297	9.09	2	3	18.4242	18.51	4	6	11.7098	16.88	4	5	308
O35092	Mitochondrial import inner membrane translocase subunit Tim17-A OS=Rattus norvegicus GN=Timm17a PE=2 SV=1 - [TI17A_RAT]	45.61	2	3	3	14	18.026	7.89893	12.8506	12.87	1	4	22.143	32.16	2	5	15.5234	26.32	2	5	171
P29975	Aquaporin-1 OS=Rattus norvegicus GN=Aqp1 PE=2 SV=4 - [AQP1_RAT]	3.35	1	1	1	14	28.8383	7.82568	11.1134	3.35	1	7	3.5904	3.35	1	3	1.63278	3.35	1	4	269
Q9QYU2	Elongation factor Ts, mitochondrial OS=Rattus norvegicus GN=Tsfm PE=2 SV=1 - [EFTS_RAT]	26.54	2	4	4	14	35.1559	6.43018	11.3513	8.64	1	3	24.9476	26.54	4	6	21.4184	11.73	2	5	324
B2GV62	Mitochondrial ribosomal protein L20 OS=Rattus norvegicus GN=Mrpl20 PE=2 SV=1 - [B2GV62_RAT]	35.57	1	3	3	14	17.5146	11.0923	7.58826	14.09	1	2	19.7878	35.57	3	6	16.0655	35.57	3	6	149
D3ZFE9	Protein LOC100359687 OS=Rattus norvegicus GN=Mrpl1 PE=2 SV=2 - [D3ZFE9_RAT]	21.43	2	4	4	14	35.965	9.11475	20.5988	17.7	3	7	14.2774	17.7	3	4	9.33617	11.18	2	3	322
F1LNG8	Protein Mpv17 OS=Rattus norvegicus GN=Mpv17 PE=2 SV=1 - [F1LNG8_RAT]	40.91	2	4	4	14	17.119	9.5249	7.72291	27.27	3	3	14.604	28.57	2	4	24.1828	22.08	2	7	154
F1M9V7	Protein Npepps OS=Rattus norvegicus GN=Npepps PE=2 SV=1 - [F1M9V7_RAT]	12.72	1	10	10	14	103.279	5.77002	5.4807	4.13	3	3	15.8332	9.67	7	8	3.82983	3.37	3	3	920
G3V9S0	Cytochrome b5 reductase 1 OS=Rattus norvegicus GN=Cyb5r1 PE=4 SV=1 - [G3V9S0_RAT]	37.7	2	8	8	14	34.2111	8.83643	2.36635	4.92	2	2	20.6411	32.46	7	8	13.1453	18.03	3	4	305
M0R776	Protein Mrps36 OS=Rattus norvegicus GN=Mrps36 PE=4 SV=1 - [M0R776_RAT]	43.69	1	3	3	14	11.406	10.3452	2.6576	35.92	2	2	7.22713	35.92	2	5	11.2452	43.69	3	7	103
Q3B8N9	Biphenyl hydrolase-like (Serine hydrolase) OS=Rattus norvegicus GN=Bphl PE=2 SV=1 - [Q3B8N9_RAT]	19.59	1	4	4	14	32.8021	8.79248	7.62896	8.59	2	4	13.4064	19.59	4	5	11.117	12.71	3	5	291
Q9Z1T4-2	Isoform 2 of Connector enhancer of kinase suppressor of ras 2 OS=Rattus norvegicus GN=Cnksr2 - [CNKR2_RAT]	0.89	2	1	1	14	101.599	7.10791	16.8029	0.89	1	9	1.97622	0.89	1	1	4.16288	0.89	1	4	896
P70583	Deoxyuridine 5'-triphosphate nucleotidohydrolase OS=Rattus norvegicus GN=Dut PE=2 SV=3 - [DUT_RAT]	24.88	2	4	4	13	21.9893	8.77783	6.50761	15.12	2	2	13.3384	19.02	3	5	16.4099	18.05	3	6	205
O88767	Protein DJ-1 OS=Rattus norvegicus GN=Park7 PE=1 SV=1 - [PARK7_RAT]	45.5	2	4	4	13	19.9614	6.771	11.0994	8.47	1	4	16.6067	35.45	3	5	12.4136	31.22	3	4	189
Q06645	ATP synthase lipid-binding protein, mitochondrial OS=Rattus norvegicus GN=Atp5g1 PE=1 SV=1 - [AT5G1_RAT]	5.15	4	1	1	13	14.2346	9.90576	14.0925	5.15	1	7	3.93446	5.15	1	2	7.99886	5.15	1	4	136
Q9NQR8	NADH dehydrogenase [ubiquinone] 1 alpha subcomplex assembly factor 4 OS=Rattus norvegicus GN=Ndufaf4 PE=1 SV=1 - [NDUF4_RAT]	24.14	2	3	3	13	20.1457	8.99756	14.1737	18.97	2	5	11.1076	24.14	3	5	7.43799	18.97	2	3	174
D3ZX08	Alanine--tRNA ligase, mitochondrial OS=Rattus norvegicus GN=Aars2 PE=2 SV=1 - [SYAM_RAT]	12.18	1	7	7	13	107.738	6.62451	10.2722	7.31	4	4	11.1937	9.24	5	5	7.66535	5.58	3	4	985
D3ZYW7	Frataxin, mitochondrial OS=Rattus norvegicus GN=Fxn PE=1 SV=1 - [FRDA_RAT]	25.96	2	4	4	13	23.0518	8.55811	11.026	12.5	2	4	10.0444	12.02	2	3	17.6744	25.96	4	6	208
D3ZL85	Protein Hccs OS=Rattus norvegicus GN=Hccs PE=4 SV=1 - [D3ZL85_RAT]	35.4	1	6	6	13	31.1099	6.72705	7.35913	11.68	2	2	17.9878	26.64	4	5	16.3491	24.45	5	6	274
D3ZT90	Glutaryl-Coenzyme A dehydrogenase (Predicted) OS=Rattus norvegicus GN=Gcdh PE=3 SV=1 - [D3ZT90_RAT]	11.63	1	3	3	13	49.6815	8.71924	19.1954	11.63	3	6	4.18748	2.68	1	2	15.1725	7.83	2	5	447
G3V7K6	Single-stranded DNA-binding protein OS=Rattus norvegicus GN=Ssbp1 PE=3 SV=1 - [G3V7K6_RAT]	22.3	2	2	2	13	17.1599	9.83252	5.80445	10.14	1	2	27.8325	22.3	2	7	15.048	22.3	2	4	148
M0RAD5	ATP-dependent Clp protease proteolytic subunit OS=Rattus norvegicus GN=Clpp PE=3 SV=1 - [M0RAD5_RAT]	17.65	1	3	3	13	29.7032	7.85498	9.67751	12.13	2	4	12.3751	12.13	2	4	16.9017	12.13	2	5	272
Q5U302	Catenin (Cadherin associated protein), alpha 1 OS=Rattus norvegicus GN=Ctnna1 PE=2 SV=1 - [Q5U302_RAT]	13.66	1	6	6	13	100.174	6.22705	16.6813	12.22	5	5	15.5316	10.79	5	6	3.63495	4.96	2	2	908
Q7TP77	Aa2-277 OS=Rattus norvegicus GN=Mrpl49 PE=2 SV=1 - [Q7TP77_RAT]	15.66	1	2	2	13	19.3941	9.34912	7.07088	8.43	1	3	15.354	15.66	2	5	16.629	15.66	2	5	166
R9PXR4	Mitochondrial import receptor subunit TOM70 OS=Rattus norvegicus GN=Tomm70a PE=4 SV=1 - [R9PXR4_RAT]	10.71	2	5	5	13	61.8991	7.48877	12.0952	8.75	4	5	7.90385	7.68	3	3	9.49882	5	3	5	560
Q07936	Annexin A2 OS=Rattus norvegicus GN=Anxa2 PE=1 SV=2 - [ANXA2_RAT]	23.3	2	6	6	12	38.6538	7.69385	35.3276	23.3	6	10	4.8934	5.01	1	1	2.81975	3.24	1	1	339
Q6AY04	Uncharacterized protein C2orf47 homolog, mitochondrial OS=Rattus norvegicus PE=2 SV=1 - [CB047_RAT]	19.93	1	5	5	12	33.0692	9.0415	3.14848	8.59	2	2	14.8697	16.15	4	6	9.72156	10.31	3	4	291
Q58FK9	Kynurenine--oxoglutarate transaminase 3 OS=Rattus norvegicus GN=Ccbl2 PE=2 SV=1 - [KAT3_RAT]	17.4	2	5	5	12	51.0113	8.35303	15.2255	14.32	4	7	6.38073	6.39	1	2	6.65384	9.47	2	3	454
A1L1L6	Mitochondrial Rho GTPase OS=Rattus norvegicus GN=Rhot1 PE=2 SV=1 - [A1L1L6_RAT]	11.89	1	4	6	12	72.1106	6.40479	6.27525	4.75	3	4	8.48688	8.87	4	7	0	1.58	1	1	631
F1LMV6	Protein Dsp OS=Rattus norvegicus GN=Dsp PE=2 SV=1 - [F1LMV6_RAT]	3.41	1	7	7	12	332.187	6.82959	10.6484	1.32	3	5	5.50634	1.04	2	2	10.0636	2.09	4	5	2877
F1M964	Mitochondrial-processing peptidase subunit alpha OS=Rattus norvegicus GN=Pmpca PE=2 SV=1 - [F1M964_RAT]	13.98	3	4	4	12	58.2066	7.92822	2.49431	2.11	1	1	16.6286	13.98	4	6	8.58635	5.36	2	5	522
G3V8L9	Polymerase I and transcript release factor OS=Rattus norvegicus GN=Ptrf PE=4 SV=1 - [G3V8L9_RAT]	15.56	2	4	4	12	43.882	5.51611	15.0542	11.73	3	5	6.17824	10.97	3	4	7.75005	2.81	1	3	392
Q63750	39S ribosomal protein L23, mitochondrial OS=Rattus norvegicus GN=Mrpl23 PE=2 SV=1 - [RM23_RAT]	35.62	1	3	3	11	17.0398	9.5835	3.24556	10.27	1	1	22.29	35.62	3	6	15.5546	35.62	3	4	146
Q64119	Myosin light polypeptide 6 OS=Rattus norvegicus GN=Myl6 PE=1 SV=3 - [MYL6_RAT]	39.74	5	3	4	11	16.9641	4.55127	9.25379	29.8	3	4	4.61695	10.6	1	2	14.6774	29.14	3	5	151
P27274	CD59 glycoprotein OS=Rattus norvegicus GN=Cd59 PE=1 SV=2 - [CD59_RAT]	16.67	1	2	2	11	13.781	8.48486	6.42449	7.14	1	3	11.0273	16.67	2	5	8.21156	16.67	2	3	126
P0CG51	Polyubiquitin-B OS=Rattus norvegicus GN=Ubb PE=1 SV=1 - [UBB_RAT]	20.98	6	1	1	11	34.3475	7.53271	27.4363	20.98	1	7	6.62274	20.98	1	2	6.92463	20.98	1	2	305
Q5PPN7	Coiled-coil domain-containing protein 51 OS=Rattus norvegicus GN=Ccdc51 PE=2 SV=2 - [CCD51_RAT]	15.61	1	5	5	11	45.7846	8.08936	6.87573	2.93	1	2	10.0377	10.98	3	6	7.42922	7.56	3	3	410
B1WBW4	Armadillo repeat-containing protein 10 OS=Rattus norvegicus GN=Armc10 PE=2 SV=1 - [ARM10_RAT]	12.09	1	2	2	11	33.4007	7.97217	3.01383	6.86	1	1	25.2032	12.09	2	6	15.8343	12.09	2	4	306
D3ZAQ0	Protein Fundc2 OS=Rattus norvegicus GN=Fundc2 PE=4 SV=1 - [D3ZAQ0_RAT]	21.19	1	4	4	11	16.3337	10.0522	2.68219	8.61	1	1	7.32613	20.53	3	5	8.3795	12.58	2	5	151
F1M9B1	Protein LOC100912008 (Fragment) OS=Rattus norvegicus GN=LOC100912008 PE=2 SV=2 - [F1M9B1_RAT]	6.69	4	4	4	11	81.6132	9.34912	9.56982	4.46	3	4	6.15382	4.87	3	3	9.01587	4.87	3	4	718
G3V644	NADH dehydrogenase (Ubiquinone) flavoprotein 3-like, isoform CRA_a OS=Rattus norvegicus GN=Ndufv3 PE=4 SV=1 - [G3V644_RAT]	12.66	1	1	3	11	49.2702	8.83643	5.14712	4.59	1	2	8.18566	4.59	1	3	14.5233	12.66	3	6	458
G3V6G7	Polyribonucleotide nucleotidyltransferase 1 OS=Rattus norvegicus GN=Pnpt1 PE=4 SV=1 - [G3V6G7_RAT]	11.22	1	6	6	11	85.8435	8.1333	13.4765	7.27	4	5	7.32771	4.72	2	2	10.3155	7.78	4	4	784
Q9Z0J5-2	Isoform 2 of Thioredoxin reductase 2, mitochondrial OS=Rattus norvegicus GN=Txnrd2 - [TRXR2_RAT]	17.52	5	6	6	11	53.206	7.7085	16.4854	14.26	5	6	6.57445	5.7	2	3	5.36183	4.68	2	2	491
D3ZCI0	Glycerol kinase OS=Rattus norvegicus GN=Gk PE=3 SV=2 - [D3ZCI0_RAT]	22.33	4	7	9	11	57.4261	5.65576					10.0367	4.77	2	4	12.9842	17.56	7	7	524
P00787	Cathepsin B OS=Rattus norvegicus GN=Ctsb PE=1 SV=2 - [CATB_RAT]	14.16	2	3	3	10	37.4456	5.60498	19.45	14.16	3	8	2.54166	5.31	1	1	0	3.83	1	1	339
Q6MG12	Uncharacterized protein C6orf136 homolog OS=Rattus norvegicus PE=2 SV=1 - [CF136_RAT]	30.23	2	5	5	10	20.4316	8.90967	1.8572	4.65	1	1	11.3124	19.77	3	4	5.7812	19.19	3	5	172
Q6PCT8	Succinate dehydrogenase [ubiquinone] cytochrome b small subunit, mitochondrial OS=Rattus norvegicus GN=Sdhd PE=2 SV=1 - [DHSD_RAT]	27.04	1	3	3	10	16.9649	9.29053	7.46787	6.29	1	5	3.79719	10.69	2	3	5.01291	22.64	2	2	159
Q10758	Keratin, type II cytoskeletal 8 OS=Rattus norvegicus GN=Krt8 PE=1 SV=3 - [K2C8_RAT]	7.04	6	2	4	10	53.9853	5.99854	2.47191	2.28	1	1	10.1854	4.14	2	4	11.0962	7.04	3	5	483
Q68FW7	Threonine--tRNA ligase, mitochondrial OS=Rattus norvegicus GN=Tars2 PE=2 SV=1 - [SYTM_RAT]	8.85	1	5	5	10	81.6208	7.86963	6.56373	5.81	3	3	10.7497	7.47	4	4	5.15225	4.43	2	3	723
Q4V8H8	EH domain-containing protein 2 OS=Rattus norvegicus GN=Ehd2 PE=1 SV=1 - [EHD2_RAT]	10.31	1	4	5	10	61.1988	6.55127	12.3215	6.81	3	5	3.8552	4.05	2	2	6.5298	5.52	3	3	543
Q6P7S1	Acid ceramidase OS=Rattus norvegicus GN=Asah1 PE=2 SV=1 - [ASAH1_RAT]	17.77	1	4	4	10	44.4148	8.30908	23.8836	17.77	4	8					6.46737	4.57	1	2	394
D3ZTW7	ATP synthase mitochondrial F1 complex assembly factor 2 (Predicted), isoform CRA_c OS=Rattus norvegicus GN=Atpaf2 PE=4 SV=1 - [D3ZTW7_RAT]	22.48	1	5	5	10	34.1706	6.55127	1.78723	7.05	2	2	12.3989	15.1	3	5	7.69773	12.42	2	3	298
D3ZXF9	Protein Mrpl12 OS=Rattus norvegicus GN=Mrpl12 PE=4 SV=1 - [D3ZXF9_RAT]	18.12	1	4	4	10	29.4229	9.65674	7.95456	9.06	2	3	5.5883	9.06	2	2	14.39	18.12	4	5	276
D4A264	Protein Zadh2 OS=Rattus norvegicus GN=Zadh2 PE=4 SV=2 - [D4A264_RAT]	20.69	1	4	4	10	40.5101	7.76709	20.3181	20.69	4	7	2.87799	3.98	1	1	5.57963	3.98	1	2	377
D4A4L5	Protein RGD1563216 OS=Rattus norvegicus GN=Isca2 PE=4 SV=1 - [D4A4L5_RAT]	36.36	1	4	4	10	16.6694	5.2749	2.70997	12.99	1	1	14.4018	23.38	3	4	16.1068	36.36	4	5	154
G3V852	Protein Tln1 OS=Rattus norvegicus GN=Tln1 PE=4 SV=1 - [G3V852_RAT]	3.7	1	6	6	10	269.504	6.20166	13.6946	2.83	5	6	7.90423	2.24	3	3	3.16041	0.83	1	1	2541
G3V8V3	Phosphorylase OS=Rattus norvegicus GN=Pygm PE=3 SV=1 - [G3V8V3_RAT]	6.65	2	5	5	10	97.2267	7.10791	9.37903	5.46	4	5	6.187	1.66	1	2	4.63877	4.39	3	3	842
P26453-2	Isoform 2 of Basigin OS=Rattus norvegicus GN=Bsg - [BASI_RAT]	12.87	2	3	3	10	29.567	5.2749	10.6199	12.87	3	5	7.48072	8.09	2	3	5.02794	8.09	2	2	272
Q5RKJ9	RAB10, member RAS oncogene family OS=Rattus norvegicus GN=Rab10 PE=2 SV=1 - [Q5RKJ9_RAT]	16.5	24	1	3	10	22.5266	8.38232	22.3961	16.5	3	9					0	5.5	1	1	200
O35093	Mitochondrial import inner membrane translocase subunit Tim23 OS=Rattus norvegicus GN=Timm23 PE=2 SV=1 - [TIM23_RAT]	23.44	3	3	3	9	21.893	8.60205	7.47566	12.92	2	3	8.09944	8.13	1	2	12.1989	23.44	3	4	209
P50123	Glutamyl aminopeptidase OS=Rattus norvegicus GN=Enpep PE=1 SV=2 - [AMPE_RAT]	5.93	3	4	4	9	107.927	5.38916	11.7953	4.97	3	4	4.75035	1.27	1	3	4.69038	2.22	2	2	945
P04642	L-lactate dehydrogenase A chain OS=Rattus norvegicus GN=Ldha PE=1 SV=1 - [LDHA_RAT]	6.63	3	1	2	9	36.4273	8.26514	4.68715	3.61	1	2	4.86349	3.61	1	2	8.93173	6.63	2	5	332
B2GV65	HIG1 domain family, member 2A OS=Rattus norvegicus GN=Higd2a PE=4 SV=1 - [B2GV65_RAT]	19.81	2	2	2	9	11.4229	9.78857	15.9	19.81	2	4	9.84838	19.81	2	3	6.62975	19.81	1	2	106
D3ZA85	Histone cell cycle regulation defective interacting protein 5 (Predicted), isoform CRA_a OS=Rattus norvegicus GN=Nfu1 PE=4 SV=1 - [D3ZA85_RAT]	17.39	1	3	3	9	28.3493	4.95752	5.51281	11.07	2	2	10.4317	11.07	2	3	14.4317	17.39	3	4	253
D3ZX69	39S ribosomal protein L10, mitochondrial OS=Rattus norvegicus GN=Mrpl10 PE=4 SV=1 - [D3ZX69_RAT]	20.99	2	3	3	9	29.4469	9.74463	5.75705	13.74	2	2	8.75598	20.99	3	4	7.28194	20.99	3	3	262
D4A830	Protein Ppa2 OS=Rattus norvegicus GN=Ppa2 PE=4 SV=1 - [D4A830_RAT]	18.48	1	5	5	9	37.818	7.1665	19.3829	16.06	4	6					3.66365	2.42	1	3	330
F1LUV9	Neural cell adhesion molecule 1 (Fragment) OS=Rattus norvegicus GN=Ncam1 PE=2 SV=2 - [F1LUV9_RAT]	2.74	3	2	2	9	92.254	4.90674	10.9404	2.74	2	4	7.28424	2.74	2	3	4.45059	2.74	2	2	838
P10111	Peptidyl-prolyl cis-trans isomerase A OS=Rattus norvegicus GN=Ppia PE=1 SV=2 - [PPIA_RAT]	29.88	2	3	4	9	17.8628	8.1626					8.08944	7.32	2	3	15.6405	29.88	4	6	164
M0RCJ8	Protein Krt78 OS=Rattus norvegicus GN=Krt78 PE=4 SV=1 - [M0RCJ8_RAT]	3.25	2	1	2	9	86.4729	6.78564					4.47805	3.25	2	2	13.853	3.25	2	7	800
Q5U1Y2	Protein Rac2 OS=Rattus norvegicus GN=Rac2 PE=2 SV=1 - [Q5U1Y2_RAT]	10.94	5	1	2	8	21.4271	7.60596	3.83017	5.21	1	3	2.26637	5.21	1	2	7.40988	10.94	2	3	192
Q91ZW1	Transcription factor A, mitochondrial OS=Rattus norvegicus GN=Tfam PE=2 SV=1 - [TFAM_RAT]	18.85	1	3	3	8	28.1688	9.74463	6.76298	9.84	2	4	7.06436	12.7	2	4					244
P07483	Fatty acid-binding protein, heart OS=Rattus norvegicus GN=Fabp3 PE=1 SV=2 - [FABPH_RAT]	29.32	1	4	4	8	14.7656	6.32861	0	10.53	1	1	4.15349	14.29	2	3	7.48241	29.32	3	4	133
P45592	Cofilin-1 OS=Rattus norvegicus GN=Cfl1 PE=1 SV=3 - [COF1_RAT]	31.93	2	3	3	8	18.5207	8.08936	3.91944	15.06	2	2	4.73193	25.3	2	2	11.2824	25.3	2	4	166
P19804	Nucleoside diphosphate kinase B OS=Rattus norvegicus GN=Nme2 PE=1 SV=1 - [NDKB_RAT]	38.16	3	4	4	8	17.2719	7.44482	2.04278	9.21	1	1	4.81166	19.08	2	4	4.66438	30.26	3	3	152
P11598	Protein disulfide-isomerase A3 OS=Rattus norvegicus GN=Pdia3 PE=1 SV=2 - [PDIA3_RAT]	12.87	1	6	6	8	56.5877	6.21436	4.33169	4.36	2	2	2.43119	1.98	1	1	10.7358	8.51	4	5	505
Q505J9	ATPase family AAA domain-containing protein 1 OS=Rattus norvegicus GN=Atad1 PE=1 SV=1 - [ATAD1_RAT]	18.28	1	5	5	8	40.691	6.90283	6.29773	7.2	2	4	4.60287	13.85	3	3	2.13023	2.49	1	1	361
O08590	Membrane primary amine oxidase OS=Rattus norvegicus GN=Aoc3 PE=1 SV=4 - [AOC3_RAT]	8.52	2	6	6	8	84.9275	6.49365	16.7493	7.34	5	7	0	1.18	1	1					763
Q07116	Sulfite oxidase, mitochondrial OS=Rattus norvegicus GN=Suox PE=1 SV=2 - [SUOX_RAT]	8.61	2	4	4	8	60.7679	6.88818	2.32263	2.01	1	2	7.33472	6.59	3	3	7.2793	5.68	3	3	546
B2GUZ3	Mthfd1l protein OS=Rattus norvegicus GN=Mthfd1l PE=2 SV=1 - [B2GUZ3_RAT]	5.42	1	3	3	8	105.776	7.50342	8.49647	5.42	3	3	6.82686	4.2	2	3	5.7229	1.54	1	2	977
D4A520	Protein Pptc7 OS=Rattus norvegicus GN=Pptc7 PE=4 SV=1 - [D4A520_RAT]	28.01	1	5	5	8	32.8262	5.2749	1.7541	4.89	1	1	10.3493	20.52	4	4	9.16597	14.33	2	3	307
D4A7Z5	Protein LOC100360940 OS=Rattus norvegicus GN=LOC100360940 PE=4 SV=1 - [D4A7Z5_RAT]	9.75	2	2	2	8	26.7905	5.49072	5.83426	9.75	2	2	10.9411	4.24	1	4	4.05364	4.24	1	2	236
D4A9P9	Gup1, glycerol uptake/transporter homolog (Yeast) (Predicted) OS=Rattus norvegicus GN=Hhatl PE=4 SV=1 - [D4A9P9_RAT]	10.34	1	4	4	8	56.3411	6.59521	20.4738	10.34	4	8									503
F1LRT5	Bis(5'-adenosyl)-triphosphatase OS=Rattus norvegicus GN=Fhit PE=2 SV=1 - [F1LRT5_RAT]	30	2	4	4	8	17.3609	6.63916	4.95706	19.33	2	2	10.9442	30	4	4	6.18962	20	2	2	150
F1LWG4	NADH dehydrogenase (Ubiquinone) 1 alpha subcomplex, assembly factor 1 (Predicted), isoform CRA_a OS=Rattus norvegicus GN=Ndufaf1 PE=4 SV=2 - [F1LWG4_RAT]	9.76	1	3	3	8	37.7581	8.104	1.69149	2.44	1	1	9.15901	7.32	2	4	7.21726	9.76	3	3	328
F1M779	Clathrin heavy chain 1 OS=Rattus norvegicus GN=Cltc PE=2 SV=1 - [F1M779_RAT]	6.39	2	6	6	8	191.438	5.69385	15.7841	4.12	4	5	5.00313	2.27	2	2	0	0.72	1	1	1675
F7F134	Voltage-dependent calcium channel subunit alpha-2/delta-1 OS=Rattus norvegicus GN=Cacna2d1 PE=4 SV=1 - [F7F134_RAT]	5.65	3	5	5	8	118.436	5.21143	4.15712	3.25	3	3	4.93863	3.64	3	3	1.77762	2.39	2	2	1045
M0R9Q9	Cytosol aminopeptidase (Fragment) OS=Rattus norvegicus GN=Lap3 PE=3 SV=1 - [M0R9Q9_RAT]	15.4	3	6	6	8	52.5947	6.48096	0	2.46	1	1	10.0861	10.47	4	5	3.64022	4.93	2	2	487
P36970-2	Isoform Cytoplasmic of Phospholipid hydroperoxide glutathione peroxidase, mitochondrial OS=Rattus norvegicus GN=Gpx4 - [GPX41_RAT]	20	4	3	3	8	19.4783	8.00146	3.50143	6.47	1	2	4.41328	13.53	2	2	7.4112	14.71	2	4	170
Q5XI86	Peptidyl-tRNA hydrolase 2 OS=Rattus norvegicus GN=Ptrh2 PE=1 SV=1 - [Q5XI86_RAT]	16.02	1	2	2	8	19.5171	7.41553	12.293	16.02	2	5	4.11251	16.02	2	2	2.21037	8.29	1	1	181
Q66HD0-2	Isoform 2 of Endoplasmin OS=Rattus norvegicus GN=Hsp90b1 - [ENPL_RAT]	11.98	2	5	6	8	74.1616	5.10986	15.5645	10.11	5	5	1.63985	1.87	1	1	4.42958	4.82	2	2	643
P09527	Ras-related protein Rab-7a OS=Rattus norvegicus GN=Rab7a PE=1 SV=2 - [RAB7A_RAT]	17.87	1	3	3	7	23.4889	6.69775	4.98723	17.87	3	3	5.2495	11.11	2	2	5.93838	6.28	1	2	207
P11980	Pyruvate kinase PKM OS=Rattus norvegicus GN=Pkm PE=1 SV=3 - [KPYM_RAT]	15.82	6	6	6	7	57.7809	7.06396	9.02468	14.12	5	5	4.78893	6.03	2	2					531
P62078	Mitochondrial import inner membrane translocase subunit Tim8 B OS=Rattus norvegicus GN=Timm8b PE=3 SV=1 - [TIM8B_RAT]	13.25	1	1	1	7	9.28052	5.12256	2.73049	13.25	1	1	6.54793	13.25	1	3	7.09307	13.25	1	3	83
P97615	Thioredoxin, mitochondrial OS=Rattus norvegicus GN=Txn2 PE=2 SV=1 - [THIOM_RAT]	13.86	1	2	2	7	18.2205	7.89893	6.90181	9.64	1	2	3.69823	9.64	1	1	12.1257	13.86	2	4	166
Q01129	Decorin OS=Rattus norvegicus GN=Dcn PE=1 SV=1 - [PGS2_RAT]	10.73	1	2	2	7	39.7799	8.79248	6.58213	2.54	1	3	2.97527	10.73	2	2	1.69214	2.54	1	2	354
P62494	Ras-related protein Rab-11A OS=Rattus norvegicus GN=Rab11a PE=1 SV=3 - [RB11A_RAT]	25	3	5	5	7	24.3784	6.56592	4.43923	25	5	5	1.73562	5.09	1	1	1.68849	5.09	1	1	216
Q9WVA1	Mitochondrial import inner membrane translocase subunit Tim8 A OS=Rattus norvegicus GN=Timm8a PE=1 SV=1 - [TIM8A_RAT]	26.8	4	2	2	7	11.0353	5.16064	4.84372	11.34	1	2	5.72102	11.34	1	2	7.40186	26.8	2	3	97
Q4FZT0	Stomatin-like protein 2, mitochondrial OS=Rattus norvegicus GN=Stoml2 PE=1 SV=1 - [STML2_RAT]	19.26	1	4	4	7	38.3902	8.63135	2.37649	4.25	1	1	8.64616	10.76	3	4	4.63323	11.33	2	2	353
Q7TT47	Paraplegin OS=Rattus norvegicus GN=Spg7 PE=2 SV=1 - [SPG7_RAT]	10.62	1	4	4	7	82.071	9.11475	0	1.48	1	1	11.8724	5.24	2	3	11.3087	6.45	2	3	744
Q68FX9	NAD-dependent protein deacylase sirtuin-5, mitochondrial OS=Rattus norvegicus GN=Sirt5 PE=2 SV=1 - [SIR5_RAT]	23.87	1	5	5	7	34.0763	8.74854	7.70155	9.03	2	3	4.86527	18.39	4	4					310
P0C2C0	39S ribosomal protein L22, mitochondrial OS=Rattus norvegicus GN=Mrpl22 PE=1 SV=1 - [RM22_RAT]	10.19	1	2	2	7	24.0237	9.92041	5.98387	10.19	2	3	2.15839	4.37	1	2	4.57378	4.37	1	2	206
P56741	Myosin-binding protein C, cardiac-type OS=Rattus norvegicus GN=Mybpc3 PE=2 SV=2 - [MYPC_RAT]	4.71	1	4	4	7	140.674	6.53662	8.18647	3.69	3	4	4.86492	2.2	2	2	2.06468	1.02	1	1	1274
D3ZJF8	Protein Fcgbp OS=Rattus norvegicus GN=Fcgbp PE=2 SV=2 - [D3ZJF8_RAT]	0.35	1	1	1	7	274.806	5.09717	2.09135	0.35	1	1	12.4963	0.35	1	6					2582
D3ZQN7	Protein Lamb1 OS=Rattus norvegicus GN=Lamb1 PE=2 SV=2 - [D3ZQN7_RAT]	2.89	1	3	3	7	202.655	5.04639	2.61195	1.09	1	1	5.06496	1.8	2	4	5.38368	1.8	2	2	1834
D4ABM5	Mitochondrial ribosomal protein S34 (Predicted), isoform CRA_a OS=Rattus norvegicus GN=Mrps34 PE=4 SV=1 - [D4ABM5_RAT]	18.81	1	3	3	7	25.7837	10.272	5.58791	6.42	1	2	7.3575	15.14	2	2	6.09534	18.81	3	3	218
D4ACA5	Protein LOC100911130 OS=Rattus norvegicus GN=LOC100911130 PE=4 SV=1 - [D4ACA5_RAT]	21.51	1	2	2	7	18.3654	9.02686	3.0153	12.79	1	1	10.938	21.51	2	3	9.63808	21.51	2	3	172
F1LPX0	Mitochondrial intermediate peptidase OS=Rattus norvegicus GN=Mipep PE=2 SV=1 - [F1LPX0_RAT]	7.89	2	4	4	7	80.6023	6.46826	4.44328	4.23	2	2	3.39511	5.49	3	3	0	1.27	1	2	710
F1LPY7	Trans-2-enoyl-CoA reductase, mitochondrial OS=Rattus norvegicus GN=Mecr PE=2 SV=1 - [F1LPY7_RAT]	20.38	2	4	4	7	40.3092	8.77783	8.55293	10.99	2	3	5.49851	6.7	2	2	7.55245	13.67	2	2	373
G3V8G5	Golgi apparatus protein 1 OS=Rattus norvegicus GN=Glg1 PE=4 SV=1 - [G3V8G5_RAT]	4.7	2	4	4	7	133.465	6.90283	2.33582	0.94	1	1	6.07597	2.31	2	2	7.8152	4.7	4	4	1171
G3V8S6	Histidine rich calcium binding protein, isoform CRA_b OS=Rattus norvegicus GN=Hrc PE=4 SV=1 - [G3V8S6_RAT]	5.7	1	3	3	7	86.4517	4.53857	7.83189	2.92	1	2	3.79397	2.92	1	1	8.55485	5.7	3	4	754
G3V985	Protein Sco1 OS=Rattus norvegicus GN=Sco1 PE=4 SV=1 - [G3V985_RAT]	17.61	1	3	3	7	31.7484	8.74854	2.1977	10.21	2	5	3.24559	4.58	1	1	3.18505	7.39	1	1	284
Q32Q54	Protein Uqcc OS=Rattus norvegicus GN=Uqcc PE=2 SV=1 - [Q32Q54_RAT]	7.02	1	2	2	7	34.5234	8.76318	8.32832	7.02	2	4	3.96714	7.02	2	2	2.21884	3.01	1	1	299
Q00715	Histone H2B type 1 OS=Rattus norvegicus PE=1 SV=2 - [H2B1_RAT]	19.2	11	2	2	7	13.9816	10.3599					6.97862	19.2	2	4	7.73542	19.2	2	3	125
F1M7T8	Protein Myom1 OS=Rattus norvegicus GN=Myom1 PE=2 SV=2 - [F1M7T8_RAT]	2.49	1	3	3	7	188.083	6.45557					15.1794	2.49	3	5	2.9618	1.89	2	2	1690
M0R785	Protein Chchd2 OS=Rattus norvegicus GN=Chchd2 PE=4 SV=1 - [M0R785_RAT]	22.73	2	2	2	7	15.8389	9.33447					8.1085	22.73	2	3	10.8318	22.73	2	4	154
Q920A6	Retinoid-inducible serine carboxypeptidase OS=Rattus norvegicus GN=Scpep1 PE=2 SV=1 - [RISC_RAT]	3.98	1	1	1	6	51.1418	5.52881	15.845	3.98	1	4	4.54469	3.98	1	1	3.61755	3.98	1	1	452
Q8R4Z9	Mitofusin-1 OS=Rattus norvegicus GN=Mfn1 PE=1 SV=1 - [MFN1_RAT]	11.2	2	5	5	6	83.7938	6.53662	4.59258	3.78	2	2	7.5808	3.24	2	3	0	4.18	1	1	741
P14562	Lysosome-associated membrane glycoprotein 1 OS=Rattus norvegicus GN=Lamp1 PE=1 SV=1 - [LAMP1_RAT]	11.06	1	4	4	6	43.9412	8.07471	12.7821	11.06	4	6									407
Q8CFN2	Cell division control protein 42 homolog OS=Rattus norvegicus GN=Cdc42 PE=1 SV=2 - [CDC42_RAT]	19.9	4	1	3	6	21.245	6.55127	6.52016	14.14	2	3	3.53399	8.9	1	1	5.37312	14.66	2	2	191
Q5XIM4	ATP synthase subunit s, mitochondrial OS=Rattus norvegicus GN=Atp5s PE=2 SV=1 - [ATP5S_RAT]	15	1	3	3	6	23.309	8.08936	10.0528	11	2	4	0	4	1	1	3.2058	5.5	1	1	200
Q8VH49	HIG1 domain family member 1A, mitochondrial OS=Rattus norvegicus GN=Higd1a PE=2 SV=2 - [HIG1A_RAT]	23.66	1	1	1	6	10.2942	9.99365	6.39182	23.66	1	3	0	23.66	1	2	0	23.66	1	1	93
Q6AY30	Saccharopine dehydrogenase-like oxidoreductase OS=Rattus norvegicus GN=Sccpdh PE=2 SV=1 - [SCPDL_RAT]	14.92	1	4	4	6	47.0581	8.83643	4.08604	9.79	2	2	3.98878	5.13	2	2	4.29502	5.13	2	2	429
Q7TSA0	Mitochondrial Rho GTPase 2 OS=Rattus norvegicus GN=Rhot2 PE=2 SV=1 - [MIRO2_RAT]	4.98	1	1	3	6	69.1092	5.70654	6.57567	4.98	3	4	4.79158	1.77	1	2					622
Q03346	Mitochondrial-processing peptidase subunit beta OS=Rattus norvegicus GN=Pmpcb PE=1 SV=3 - [MPPB_RAT]	11.66	1	5	5	6	54.2304	6.69775	2.02676	2.45	1	1	7.92104	9.2	4	4	2.33584	2.45	1	1	489
A9UMV7	Protein Uqcr11 OS=Rattus norvegicus GN=LOC686442 PE=4 SV=1 - [A9UMV7_RAT]	21.43	1	1	1	6	6.53444	9.70068	8.58858	21.43	1	3	3.00941	21.43	1	1	7.87062	21.43	1	2	56
B0BN02	Mtx1 protein OS=Rattus norvegicus GN=Mtx1 PE=2 SV=1 - [B0BN02_RAT]	9.49	1	3	3	6	48.4128	9.46631	11.0933	9.49	3	4	2.80986	3.7	1	1	1.8544	2.08	1	1	432
B0BN81	Ribosomal protein S5, isoform CRA_b OS=Rattus norvegicus GN=Rps5 PE=2 SV=1 - [B0BN81_RAT]	7.35	1	1	1	6	22.8921	9.71533	6.67068	7.35	1	2	6.71442	7.35	1	2	5.43142	7.35	1	2	204
B2RYU0	NADH dehydrogenase (Ubiquinone) 1 beta subcomplex, 2 (Predicted), isoform CRA_b OS=Rattus norvegicus GN=Ndufb2 PE=4 SV=1 - [B2RYU0_RAT]	18.1	1	1	1	6	11.8349	6.3667	7.43824	18.1	1	2	7.80262	18.1	1	2	7.09454	18.1	1	2	105
C0JPT7	Filamin alpha OS=Rattus norvegicus GN=Flna PE=2 SV=1 - [C0JPT7_RAT]	3.11	1	5	5	6	280.32	6.03662	9.56387	1.74	3	4	2.54642	0.91	1	1	3.3713	0.45	1	1	2639
D3ZJY1	Protein Mrpl28 OS=Rattus norvegicus GN=Mrpl28 PE=4 SV=1 - [D3ZJY1_RAT]	8.17	1	2	2	6	30.2179	8.32373	3.8172	8.17	2	3	2.29047	3.5	1	1	4.22929	8.17	2	2	257
D3ZVS2	L-2-hydroxyglutarate dehydrogenase (Predicted) OS=Rattus norvegicus GN=L2hgdh PE=4 SV=1 - [D3ZVS2_RAT]	9.07	1	3	3	6	50.7005	8.48486	13.5529	6.91	2	5	0	2.16	1	1					463
D4A4P4	Protein Flad1 OS=Rattus norvegicus GN=Flad1 PE=2 SV=2 - [D4A4P4_RAT]	4.08	1	1	1	6	54.57	6.80029	5.41205	4.08	1	2	6.34225	4.08	1	2	6.52948	4.08	1	2	490
F1LMZ4	Ribosome-releasing factor 2, mitochondrial OS=Rattus norvegicus GN=Gfm2 PE=2 SV=2 - [F1LMZ4_RAT]	4.36	2	3	3	6	85.8606	6.50732	0	1.16	1	1	4.15542	3.21	2	2	1.81986	3.21	2	3	779
F1M705	Uncharacterized protein (Fragment) OS=Rattus norvegicus PE=2 SV=2 - [F1M705_RAT]	3.4	1	5	5	6	245.637	5.98584	5.26222	1.56	2	2	2.94592	1.32	2	2	4.09983	0.52	1	2	2117
F1MAN8	Laminin, alpha 5, isoform CRA_a OS=Rattus norvegicus GN=Lama5 PE=4 SV=2 - [F1MAN8_RAT]	1.21	1	2	2	6	403.517	6.68311	8.95457	0.73	1	3	6.75631	1.21	2	2	3.19573	0.73	1	1	3713
F7EZZ0	Disks large-associated protein 3 OS=Rattus norvegicus GN=Dap3 PE=4 SV=1 - [F7EZZ0_RAT]	5.56	1	2	2	6	45.0834	9.1001	5.02217	5.56	2	3					3.75409	5.56	2	3	396
G3V778	Pyruvate dehydrogenase kinase, isoenzyme 4 OS=Rattus norvegicus GN=Pdk4 PE=4 SV=1 - [G3V778_RAT]	13.11	2	3	3	6	46.5796	7.07861	8.93135	9.47	2	3	3.03817	3.64	1	1	6.90774	6.8	1	2	412
M0R3K0	Uncharacterized protein OS=Rattus norvegicus PE=3 SV=1 - [M0R3K0_RAT]	24.02	6	4	4	6	20.3766	6.80029	4.88717	16.2	3	3					6.86307	24.02	3	3	179
D3Z9N3	Leucyl-tRNA synthetase, mitochondrial (Predicted) OS=Rattus norvegicus GN=Lars2 PE=4 SV=1 - [D3Z9N3_RAT]	3.08	1	2	2	6	79.6279	7.72314					3.60476	3.08	2	3	1.67062	3.08	2	3	714
D3ZPP9	Protein RGD1306058 OS=Rattus norvegicus GN=RGD1306058 PE=4 SV=1 - [D3ZPP9_RAT]	17.24	1	3	3	6	23.313	8.39697					7.93387	17.24	3	4	6.31087	11.82	2	2	203
D4A1G4	Cytochrome b5 OS=Rattus norvegicus GN=Cyb5a PE=2 SV=1 - [D4A1G4_RAT]	55	3	4	4	6	11.4747	5.70654					8.06517	34	3	5	0	21	1	1	100
P63031	Mitochondrial pyruvate carrier 1 OS=Rattus norvegicus GN=Mpc1 PE=2 SV=1 - [MPC1_RAT]	32.11	1	2	2	5	12.4463	9.61279	11.9527	32.11	2	5									109
P63102	14-3-3 protein zeta/delta OS=Rattus norvegicus GN=Ywhaz PE=1 SV=1 - [1433Z_RAT]	4.9	1	1	1	5	27.7537	4.79248	2.89261	4.9	1	1	7.33463	4.9	1	2	6.58114	4.9	1	2	245
P14668	Annexin A5 OS=Rattus norvegicus GN=Anxa5 PE=1 SV=3 - [ANXA5_RAT]	5.02	2	1	1	5	35.7223	5.04639	5.18909	5.02	1	2	3.035	5.02	1	1	5.92355	5.02	1	2	319
Q9EPJ3	28S ribosomal protein S26, mitochondrial OS=Rattus norvegicus GN=Mrps26 PE=1 SV=1 - [RT26_RAT]	10	1	2	2	5	23.3356	9.96436	1.75876	5.5	1	1					9.23905	10	2	4	200
P53534	Glycogen phosphorylase, brain form (Fragment) OS=Rattus norvegicus GN=Pygb PE=1 SV=3 - [PYGB_RAT]	6.56	2	4	4	5	96.1131	6.68311	4.16669	5.13	3	3	2.04926	1.43	1	1	0	1.31	1	1	838
Q9JLJ3	4-trimethylaminobutyraldehyde dehydrogenase OS=Rattus norvegicus GN=Aldh9a1 PE=1 SV=1 - [AL9A1_RAT]	7.09	1	2	2	5	53.618	6.91748	0	7.09	2	3	0	5.06	1	1	0	5.06	1	1	494
P10960	Sulfated glycoprotein 1 OS=Rattus norvegicus GN=Psap PE=1 SV=1 - [SAP_RAT]	4.51	2	2	2	5	61.0836	5.24951	6.5021	4.51	2	3	2.45945	1.81	1	1	1.85991	2.71	1	1	554
Q4V897	Coiled-coil domain-containing protein 90B, mitochondrial OS=Rattus norvegicus GN=Ccdc90b PE=2 SV=1 - [CC90B_RAT]	23.83	1	3	3	5	29.7814	8.36768	7.93732	23.83	3	3					6.36574	14.84	2	2	256
Q4KLP0	Probable 2-oxoglutarate dehydrogenase E1 component DHKTD1, mitochondrial OS=Rattus norvegicus GN=Dhtkd1 PE=2 SV=1 - [DHTK1_RAT]	6.85	2	3	3	5	102.576	7.03467	2.92841	2.72	1	1	1.96228	0.98	1	1	4.24092	4.13	2	3	920
Q6PDW6	39S ribosomal protein L17, mitochondrial OS=Rattus norvegicus GN=Mrpl17 PE=2 SV=1 - [RM17_RAT]	14.2	1	2	2	5	20.2518	10.0376	2.27585	7.39	1	1	6.90055	14.2	2	3	2.36391	6.82	1	1	176
Q6PEB9	Coiled-coil domain-containing protein 127 OS=Rattus norvegicus GN=Ccdc127 PE=2 SV=2 - [CC127_RAT]	14.23	2	2	2	5	30.4509	9.02686	2.67102	8.08	1	1	8.6087	8.08	1	2	6.88436	14.23	2	2	260
Q5I0K5	Mycophenolic acid acyl-glucuronide esterase, mitochondrial OS=Rattus norvegicus GN=Abhd10 PE=1 SV=2 - [ABHDA_RAT]	7.07	1	2	2	5	33.1313	8.89502	1.79299	3.7	1	1	7.40001	7.07	2	3	1.65776	3.7	1	1	297
A1L1J4	Protein phosphatase 2C, magnesium dependent, catalytic subunit OS=Rattus norvegicus GN=Pdp1 PE=2 SV=1 - [A1L1J4_RAT]	2.79	2	1	1	5	61.1416	6.66846	3.27419	2.79	1	1	7.09334	2.79	1	2	6.55738	2.79	1	2	538
D3ZZV1	Mitochondrial import inner membrane translocase subunit TIM16 OS=Rattus norvegicus GN=Pam16 PE=4 SV=1 - [D3ZZV1_RAT]	21.6	1	1	1	5	13.7632	9.5249	2.85795	21.6	1	1	3.7621	21.6	1	1	10.248	21.6	1	3	125
D4A131	Mitochondrial ribosomal protein L4 (Predicted), isoform CRA_b OS=Rattus norvegicus GN=Mrpl4 PE=3 SV=1 - [D4A131_RAT]	11.22	1	2	2	5	33.0614	9.74463	11.2179	5.44	1	3	2.4663	5.44	1	1	2.59212	5.78	1	1	294
D4AAU8	Leucine-rich repeat-containing 10 (Predicted) OS=Rattus norvegicus GN=LOC100911101 PE=4 SV=1 - [D4AAU8_RAT]	9.89	1	2	2	5	31.0725	8.47021	2.43142	4.4	1	1	1.81397	4.4	1	1	5.33791	9.89	2	3	273
G3V616	Divalent cation tolerant protein CUTA, isoform CRA_b OS=Rattus norvegicus GN=Cuta PE=4 SV=1 - [G3V616_RAT]	18.08	2	2	2	5	18.7459	7.34229	1.73331	7.91	1	1	1.88902	7.91	1	1	7.06699	18.08	2	3	177
G3V7K3	Ceruloplasmin OS=Rattus norvegicus GN=Cp PE=4 SV=1 - [G3V7K3_RAT]	4.82	2	4	4	5	120.589	5.64307	9.32628	3.97	3	3	0	1.51	1	1	1.9749	0.85	1	1	1059
G3V7L0	Adrenodoxin, mitochondrial OS=Rattus norvegicus GN=Fdx1 PE=4 SV=1 - [G3V7L0_RAT]	11.17	2	2	2	5	20.136	5.88428	0	4.79	1	1	1.72691	4.79	1	1	5.07863	11.17	2	3	188
G3V886	Protein LOC100910779 OS=Rattus norvegicus GN=Yme1l1 PE=3 SV=1 - [G3V886_RAT]	7.27	2	3	3	5	79.7457	8.89502	7.25476	4.34	2	2	3.54839	2.94	1	1	10.0366	2.8	1	2	715
Q0D2L2	Protein Mrps22 OS=Rattus norvegicus GN=LOC683519 PE=2 SV=1 - [Q0D2L2_RAT]	16.99	1	4	4	5	41.2094	8.30908	7.92173	7.52	1	2	4.32662	6.13	2	2	2.24521	3.34	1	1	359
Q5FVG4	Protein LOC100911440 OS=Rattus norvegicus GN=Slc25a22 PE=2 SV=1 - [Q5FVG4_RAT]	22.27	2	4	4	5	24.6238	8.60205	7.23762	12.66	3	4	2.03965	9.61	1	1					229
Q5U3Z7	Serine hydroxymethyltransferase OS=Rattus norvegicus GN=Shmt2 PE=2 SV=1 - [Q5U3Z7_RAT]	7.54	1	3	3	5	55.7296	8.20654	7.083	7.54	3	3	0	1.79	1	1	1.87015	1.79	1	1	504
Q5XIF7	Nicotinamide nucleotide adenylyltransferase 3 OS=Rattus norvegicus GN=Nmnat3 PE=2 SV=1 - [Q5XIF7_RAT]	24.59	1	2	2	5	13.6669	8.54346	2.04303	8.2	1	1	2.12956	24.59	2	2	4.65476	24.59	2	2	122
Q642E6	Tripeptidyl peptidase I OS=Rattus norvegicus GN=Tpp1 PE=2 SV=1 - [Q642E6_RAT]	3.73	2	1	1	5	61.2748	6.63916	9.53	3.73	1	3	2.49004	3.73	1	1	3.47262	3.73	1	1	563
Q7H113	NADH-ubiquinone oxidoreductase chain 4 OS=Rattus norvegicus GN=Mt-nd4l PE=3 SV=1 - [Q7H113_RAT]	18.37	1	1	1	5	10.6514	5.70654	18.611	18.37	1	5									98
P29418	ATP synthase subunit epsilon, mitochondrial OS=Rattus norvegicus GN=Atp5e PE=1 SV=2 - [ATP5E_RAT]	13.73	2	1	1	5	5.76311	10.0083					9.98651	13.73	1	5					51
Q7TQ82	28S ribosomal protein S10, mitochondrial OS=Rattus norvegicus GN=Mrps10 PE=2 SV=1 - [RT10_RAT]	17.42	1	2	2	5	17.9484	8.646					9.54285	9.68	1	2	9.18771	17.42	2	3	155
Q6AY55	Dephospho-CoA kinase domain-containing protein OS=Rattus norvegicus GN=Dcakd PE=2 SV=1 - [DCAKD_RAT]	4.58	1	1	1	5	27.3347	9.68604					4.88565	4.58	1	2	7.86277	4.58	1	3	240
P48500	Triosephosphate isomerase OS=Rattus norvegicus GN=Tpi1 PE=1 SV=2 - [TPIS_RAT]	25.3	2	3	3	5	26.8318	7.23975					2.97529	13.65	2	2	3.73525	17.27	2	3	249
B1WC49	Api5 protein OS=Rattus norvegicus GN=Api5 PE=2 SV=1 - [B1WC49_RAT]	1.59	1	1	1	5	56.7498	5.92236					4.54726	1.59	1	2	4.32285	1.59	1	3	504
B2GV57	Protein Cars2 OS=Rattus norvegicus GN=Cars2 PE=2 SV=1 - [B2GV57_RAT]	9.27	1	4	4	5	60.8792	8.29443					5.83519	4.18	2	2	7.27344	7.27	3	3	550
B2RZ57	Mitochondrial ribosomal protein L18 OS=Rattus norvegicus GN=Mrpl18 PE=2 SV=1 - [B2RZ57_RAT]	15.56	1	3	3	5	20.6375	8.85107					3.98648	5	1	2	5.35056	15.56	3	3	180
D3ZXP3	Histone H2A OS=Rattus norvegicus GN=H2afx PE=3 SV=1 - [D3ZXP3_RAT]	32.17	5	1	3	5	15.1054	10.7407					2.13238	6.29	1	1	6.76073	32.17	3	4	143
D3ZY50	ATP synthase mitochondrial F1 complex assembly factor 1 (Predicted), isoform CRA_a OS=Rattus norvegicus GN=Atpaf1 PE=4 SV=1 - [D3ZY50_RAT]	10.92	1	2	2	5	38.6254	5.66846					4.97101	10.92	2	2	7.78859	10.92	2	3	348
F1LRK4	Protein Grsf1 OS=Rattus norvegicus GN=Grsf1 PE=2 SV=2 - [F1LRK4_RAT]	7.1	1	2	2	5	52.8736	6.66846					2.37833	7.1	2	3	2.6504	7.1	2	2	479
F1M614	Protein Lama2 (Fragment) OS=Rattus norvegicus GN=Lama2 PE=2 SV=2 - [F1M614_RAT]	2.47	1	4	4	5	280.438	5.92236					9.58184	2.04	3	4	0	0.43	1	1	2546
Q6AXW1-2	Isoform 2 of Glutaredoxin-2, mitochondrial OS=Rattus norvegicus GN=Glrx2 - [GLRX2_RAT]	31.45	2	2	2	5	13.9939	8.68994					4.02148	12.9	1	2	7.72882	31.45	2	3	124
P61016	Cardiac phospholamban OS=Rattus norvegicus GN=Pln PE=2 SV=1 - [PPLA_RAT]	21.15	1	1	1	4	6.09034	8.80713	4.63724	21.15	1	2	2.97687	21.15	1	1	2.508	21.15	1	1	52
P42676	Neurolysin, mitochondrial OS=Rattus norvegicus GN=Nln PE=1 SV=1 - [NEUL_RAT]	3.13	1	2	2	4	80.2025	6.46826	2.45243	1.42	1	2	2.16826	1.7	1	1	4.17851	1.7	1	1	704
Q811A2	Bone marrow stromal antigen 2 OS=Rattus norvegicus GN=Bst2 PE=1 SV=1 - [BST2_RAT]	5.23	1	1	1	4	19.6613	8.19189	2.01301	5.23	1	2	1.74368	5.23	1	1	1.90192	5.23	1	1	172
P53987	Monocarboxylate transporter 1 OS=Rattus norvegicus GN=Slc16a1 PE=1 SV=1 - [MOT1_RAT]	2.63	1	1	1	4	53.2034	8.32373	10.9781	2.63	1	4									494
Q5EB77	Ras-related protein Rab-18 OS=Rattus norvegicus GN=Rab18 PE=2 SV=1 - [RAB18_RAT]	10.68	1	2	2	4	22.9616	5.23682	4.2839	10.68	2	2	2.48727	5.34	1	1	2.02016	5.34	1	1	206
Q9EPT8	Chloride intracellular channel protein 5 OS=Rattus norvegicus GN=Clic5 PE=1 SV=1 - [CLIC5_RAT]	8.37	1	1	1	4	28.2814	5.93506	4.6261	8.37	1	1	4.46327	8.37	1	1	6.33878	8.37	1	2	251
P05504	ATP synthase subunit a OS=Rattus norvegicus GN=Mt-atp6 PE=1 SV=2 - [ATP6_RAT]	4.42	3	1	1	4	25.0338	9.59814	7.18076	4.42	1	3	0	4.42	1	1					226
P62632	Elongation factor 1-alpha 2 OS=Rattus norvegicus GN=Eef1a2 PE=2 SV=1 - [EF1A2_RAT]	7.56	3	1	2	4	50.4223	9.02686	10.0205	7.56	2	4									463
Q6AYD9	Nucleoside diphosphate-linked moiety X motif 19, mitochondrial OS=Rattus norvegicus GN=Nudt19 PE=2 SV=1 - [NUD19_RAT]	12.04	1	4	4	4	39.9133	6.88818	0	5.88	2	2	1.61135	2.52	1	1	2.55429	3.64	1	1	357
Q4G012	UPF0562 protein C7orf55 homolog OS=Rattus norvegicus PE=3 SV=1 - [CG055_RAT]	17.7	1	1	1	4	12.7367	10.0815	2.95201	17.7	1	1	6.26554	17.7	1	2	2.83914	17.7	1	1	113
Q5I0K8	28S ribosomal protein S7, mitochondrial OS=Rattus norvegicus GN=Mrps7 PE=2 SV=2 - [RT07_RAT]	10.33	1	2	2	4	28.1788	10.0229	4.89787	10.33	2	2	2.21718	5.37	1	1	2.5954	5.37	1	1	242
D3Z946	Protein Tmem70 OS=Rattus norvegicus GN=Tmem70 PE=4 SV=1 - [D3Z946_RAT]	3.56	1	1	1	4	28.3806	8.90967	3.29847	3.56	1	2	0	3.56	1	2					253
D3Z9I1	Protein Coa3 OS=Rattus norvegicus GN=Coa3 PE=4 SV=1 - [D3Z9I1_RAT]	18.52	1	2	2	4	11.9212	9.59814	2.53898	18.52	2	2					5.8618	9.26	1	2	108
D3ZBM3	Ferrochelatase OS=Rattus norvegicus GN=Fech PE=3 SV=1 - [D3ZBM3_RAT]	7.11	1	2	2	4	47.5213	8.71924	7.84396	7.11	2	3	2.69413	3.79	1	1					422
D3ZFJ6	Lactamase, beta (Predicted) OS=Rattus norvegicus GN=Lactb PE=4 SV=1 - [D3ZFJ6_RAT]	4.36	1	2	2	4	60.382	8.82178	3.02829	2.73	1	1	5.01178	4.36	2	2	4.12164	2.73	1	1	550
D3ZMR9	Mitochondrial ribosomal protein L21 (Predicted), isoform CRA_a OS=Rattus norvegicus GN=Mrpl21 PE=4 SV=1 - [D3ZMR9_RAT]	9.09	1	2	2	4	23.3758	9.94971	0	9.09	2	2					1.79145	9.09	2	2	209
D3ZYT2	Mitochondrial ribosomal protein S5 (Predicted) OS=Rattus norvegicus GN=Mrps5 PE=3 SV=1 - [D3ZYT2_RAT]	5.79	1	1	2	4	48.1061	10.0083	4.2817	5.79	2	2	4.65377	2.55	1	2					432
D3ZZ20	Protein Afg3l1 OS=Rattus norvegicus GN=Afg3l1 PE=2 SV=2 - [D3ZZ20_RAT]	2.28	1	1	2	4	87.1479	8.6167	1.73819	2.28	2	2	1.7298	1.01	1	1	0	1.01	1	1	789
D4A1V1	Intraflagellar transport 57 homolog (Chlamydomonas) (Predicted) OS=Rattus norvegicus GN=Ift57 PE=4 SV=1 - [D4A1V1_RAT]	5.36	1	1	1	4	48.7505	5.0083	3.08978	5.36	1	1					11.0095	5.36	1	3	429
D4A4B1	Mitochondrial ribosomal protein L15 (Predicted), isoform CRA_c OS=Rattus norvegicus GN=Mrpl15 PE=3 SV=2 - [D4A4B1_RAT]	6.34	1	1	1	4	23.2082	10.5942	2.09294	6.34	1	1	5.03374	6.34	1	2	2.72787	6.34	1	1	205
F1M7X5	Dipeptidyl peptidase 4 OS=Rattus norvegicus GN=Dpp4 PE=2 SV=1 - [F1M7X5_RAT]	5.72	2	3	3	4	84.1158	6.1001	8.27644	5.72	3	4									734
F1M9G8	Histidine triad nucleotide-binding protein 3 OS=Rattus norvegicus GN=Hint3 PE=2 SV=1 - [F1M9G8_RAT]	5.71	2	1	1	4	19.7228	6.7124	1.92844	5.71	1	1	4.31085	5.71	1	2	1.85187	5.71	1	1	175
G3V7C6	RCG45400 OS=Rattus norvegicus GN=Tubb4b PE=3 SV=1 - [G3V7C6_RAT]	13.93	8	4	4	4	49.799	4.89404	2.15152	10.11	3	3	2.14759	3.82	1	1					445
G3V804	Sideroflexin 3 OS=Rattus norvegicus GN=Sfxn3 PE=4 SV=1 - [G3V804_RAT]	14.02	2	2	2	4	35.4286	9.68604	4.67101	14.02	2	3	3.6569	9.35	1	1					321
P11915-2	Isoform SCP2 of Non-specific lipid-transfer protein OS=Rattus norvegicus GN=Scp2 - [NLTP_RAT]	20.98	3	3	3	4	15.2879	8.57275	4.23761	12.59	2	2	0	8.39	1	1	2.11606	8.39	1	1	143
Q4G067	Mitochondrial ribosomal protein L44 OS=Rattus norvegicus GN=Mrpl44 PE=2 SV=1 - [Q4G067_RAT]	12.65	1	2	2	4	37.4167	8.82178	5.53143	5.72	1	1	6.44195	12.65	2	2	1.88485	5.72	1	1	332
Q5FVL8	ATP-binding cassette, sub-family B (MDR/TAP), member 10 OS=Rattus norvegicus GN=Abcb10 PE=2 SV=1 - [Q5FVL8_RAT]	6.43	1	2	2	4	77.346	9.62744	7.70575	6.43	2	3					2.3173	3.5	1	1	715
Q8R3Z7	EH-domain containing 4 OS=Rattus norvegicus GN=Ehd4 PE=2 SV=1 - [Q8R3Z7_RAT]	7.02	1	3	3	4	61.4285	6.75635	5.81466	4.62	2	2	3.02879	2.77	1	1	0	2.4	1	1	541
P62804	Histone H4 OS=Rattus norvegicus GN=Hist1h4b PE=1 SV=2 - [H4_RAT]	27.18	1	3	3	4	11.3604	11.356					3.41536	17.48	2	2	4.7186	19.42	2	2	103
Q6IG04	Keratin, type II cytoskeletal 72 OS=Rattus norvegicus GN=Krt72 PE=2 SV=2 - [K2C72_RAT]	4.04	2	1	2	4	56.8159	7.35693					3.99732	4.04	2	2	4.03037	2.31	1	2	520
D3Z9U2	CD163 antigen (Predicted) OS=Rattus norvegicus GN=Cd163 PE=4 SV=1 - [D3Z9U2_RAT]	2.05	1	2	2	4	120.643	6.16357					0	2.05	2	2	0	2.05	2	2	1120
G3V7K1	Myomesin 2 OS=Rattus norvegicus GN=Myom2 PE=4 SV=1 - [G3V7K1_RAT]	3.07	1	3	3	4	164.609	5.88428					2.02404	0.68	1	1	9.17739	2.39	2	3	1464
M0R3K2	Glutamyl-tRNA(Gln) amidotransferase subunit C, mitochondrial OS=Rattus norvegicus GN=LOC100909836 PE=3 SV=1 - [M0R3K2_RAT]	24.82	2	2	2	4	15.4279	5.35107					4.59584	24.82	2	2	4.64787	24.82	2	2	141
G3V9M6	Fibrillin 1, isoform CRA_a OS=Rattus norvegicus GN=Fbn1 PE=4 SV=1 - [G3V9M6_RAT]	1.6	1	4	4	4	311.738	4.93213									6.72626	1.6	4	4	2872
P21588	5'-nucleotidase OS=Rattus norvegicus GN=Nt5e PE=1 SV=1 - [5NTD_RAT]	2.6	2	1	1	3	63.9281	6.97607	2.10702	2.6	1	1					2.29481	2.6	1	2	576
P19944	60S acidic ribosomal protein P1 OS=Rattus norvegicus GN=Rplp1 PE=3 SV=1 - [RLA1_RAT]	14.04	1	1	1	3	11.4907	4.32275	6.07913	14.04	1	2					2.85462	14.04	1	1	114
Q63570	26S protease regulatory subunit 6B OS=Rattus norvegicus GN=Psmc4 PE=1 SV=1 - [PRS6B_RAT]	2.87	1	1	1	3	47.3786	5.21143	2.54456	2.87	1	1	2.8386	2.87	1	1	2.39651	2.87	1	1	418
P19945	60S acidic ribosomal protein P0 OS=Rattus norvegicus GN=Rplp0 PE=1 SV=2 - [RLA0_RAT]	6.62	3	2	2	3	34.1938	6.25244	7.81308	6.62	2	3									317
P97849	Long-chain fatty acid transport protein 1 OS=Rattus norvegicus GN=Slc27a1 PE=2 SV=1 - [S27A1_RAT]	3.41	2	2	2	3	71.2377	8.45557	4.6242	3.41	2	2					2.46459	2.17	1	1	646
P35565	Calnexin OS=Rattus norvegicus GN=Canx PE=1 SV=1 - [CALX_RAT]	5.25	1	2	2	3	67.2126	4.62744	5.15179	5.25	2	3									591
Q5XIF6	Tubulin alpha-4A chain OS=Rattus norvegicus GN=Tuba4a PE=2 SV=1 - [TBA4A_RAT]	3.13	4	1	1	3	49.8924	5.05908	1.84903	3.13	1	1	2.89611	3.13	1	1	2.56526	3.13	1	1	448
P97852	Peroxisomal multifunctional enzyme type 2 OS=Rattus norvegicus GN=Hsd17b4 PE=1 SV=3 - [DHB4_RAT]	4.08	1	2	2	3	79.378	8.57275	4.6336	4.08	2	2					0	2.59	1	1	735
P00564	Creatine kinase M-type OS=Rattus norvegicus GN=Ckm PE=1 SV=2 - [KCRM_RAT]	3.67	1	1	1	3	43.0178	7.06396	8.5807	3.67	1	3									381
P62161	Calmodulin OS=Rattus norvegicus GN=Calm1 PE=1 SV=2 - [CALM_RAT]	22.15	3	2	2	3	16.8268	4.22119	3.36299	10.74	1	1					5.14737	22.15	2	2	149
P31044	Phosphatidylethanolamine-binding protein 1 OS=Rattus norvegicus GN=Pebp1 PE=1 SV=3 - [PEBP1_RAT]	6.95	1	1	1	3	20.7884	5.79541	4.67184	6.95	1	2					2.3317	6.95	1	1	187
Q6AXT0	39S ribosomal protein L37, mitochondrial OS=Rattus norvegicus GN=Mrpl37 PE=2 SV=1 - [RM37_RAT]	3.78	1	1	1	3	48.3354	8.92432	2.97037	3.78	1	1	3.24598	3.78	1	1	1.89899	3.78	1	1	423
Q566R0	Acyl-coenzyme A thioesterase THEM4 OS=Rattus norvegicus GN=Them4 PE=2 SV=1 - [THEM4_RAT]	7.83	1	1	1	3	26.0724	8.92432	5.13044	7.83	1	3									230
Q5I0I4	ATP synthase subunit s-like protein OS=Rattus norvegicus GN=Atp5sl PE=2 SV=1 - [AT5SL_RAT]	4.72	1	1	1	3	28.4897	8.26514	0	4.72	1	1	0	4.72	1	1	2.81467	4.72	1	1	254
Q5U2U0	ATP-dependent Clp protease ATP-binding subunit clpX-like, mitochondrial OS=Rattus norvegicus GN=Clpx PE=2 SV=1 - [CLPX_RAT]	1.58	1	1	1	3	69.1647	7.72314	2.7105	1.58	1	1	3.65533	1.58	1	2					633
Q5RJQ7	Succinate dehydrogenase assembly factor 2, mitochondrial OS=Rattus norvegicus GN=Sdhaf2 PE=2 SV=1 - [SDHF2_RAT]	8.54	1	1	1	3	19.5121	6.59521	2.94353	8.54	1	1	2.65963	8.54	1	1	2.62982	8.54	1	1	164
P12346	Serotransferrin OS=Rattus norvegicus GN=Tf PE=1 SV=3 - [TRFE_RAT]	5.87	4	3	3	3	76.3456	7.28369	4.91372	4.73	2	2					0	1.15	1	1	698
Q9QZA2	Programmed cell death 6-interacting protein OS=Rattus norvegicus GN=Pdcd6ip PE=1 SV=2 - [PDC6I_RAT]	2.86	1	2	2	3	96.5705	6.52197	2.43671	1.6	1	1					4.33496	2.86	2	2	873
B5DEQ3	Probable Xaa-Pro aminopeptidase 3 OS=Rattus norvegicus GN=Xpnpep3 PE=1 SV=1 - [XPP3_RAT]	9.49	2	3	3	3	56.4186	7.13721	1.63634	2.17	1	1	2.16247	7.31	2	2					506
B0BMW0	RAB14, member RAS oncogene family OS=Rattus norvegicus GN=Rab14 PE=2 SV=1 - [B0BMW0_RAT]	11.63	19	1	2	3	23.8819	6.21436	7.05856	11.63	2	3									215
B0BN68	Mitochondrial ribosomal protein S9 OS=Rattus norvegicus GN=Mrps9 PE=2 SV=1 - [B0BN68_RAT]	6.41	1	2	2	3	44.982	9.11475	2.7968	3.33	1	1					2.99896	6.41	2	2	390
B1WBY5	DnaJ (Hsp40) homolog, subfamily C, member 11 OS=Rattus norvegicus GN=Dnajc11 PE=2 SV=1 - [B1WBY5_RAT]	4.83	1	2	2	3	63.1658	8.32373	4.05174	4.83	2	3									559
D3ZD31	Mannose receptor, C type 1 (Predicted) OS=Rattus norvegicus GN=Mrc1 PE=4 SV=2 - [D3ZD31_RAT]	1.71	1	1	1	3	165.752	6.82959	8.64714	1.71	1	3									1463
D3ZH23	Protein RGD1560917 OS=Rattus norvegicus GN=RGD1560917 PE=4 SV=1 - [D3ZH23_RAT]	18.66	2	2	2	3	15.185	9.81787	1.83317	9.7	1	1	5.6503	18.66	2	2					134
D3ZSD8	Protein Tmem143 OS=Rattus norvegicus GN=Tmem143 PE=4 SV=1 - [D3ZSD8_RAT]	6.99	1	2	2	3	51.5371	9.18799	4.67873	6.99	2	2	2.11619	3.93	1	1					458
D3ZXD2	Protein Abca8a (Fragment) OS=Rattus norvegicus GN=Abca8a PE=2 SV=2 - [D3ZXD2_RAT]	1.7	2	2	2	3	180.344	6.82959	4.75242	0.76	1	2	2.14476	0.94	1	1					1588
D3ZYY0	Protein Sdr39u1 OS=Rattus norvegicus GN=Sdr39u1 PE=4 SV=1 - [D3ZYY0_RAT]	3.02	1	1	1	3	31.9238	8.04541	0	3.02	1	1	4.42308	3.02	1	2					298
D4ACU9	Protein Itga5 (Fragment) OS=Rattus norvegicus GN=Itga5 PE=4 SV=2 - [D4ACU9_RAT]	1.28	1	1	1	3	119.228	6.27783	3.42689	1.28	1	1	3.41096	1.28	1	1	2.47631	1.28	1	1	1098
F1LLX8	Lysosome-associated membrane glycoprotein 2 OS=Rattus norvegicus GN=Lamp2 PE=2 SV=1 - [F1LLX8_RAT]	2.43	2	1	1	3	45.1271	7.88428	5.93555	2.43	1	3									411
F1LN18	Hypoxia up-regulated protein 1 OS=Rattus norvegicus GN=Hyou1 PE=2 SV=1 - [F1LN18_RAT]	4.8	2	3	3	3	111.222	5.18604	2.45793	1.9	1	1	4.84804	2.9	2	2					999
F1LP46	ATP-dependent RNA helicase SUPV3L1, mitochondrial (Fragment) OS=Rattus norvegicus GN=Supv3l1 PE=2 SV=1 - [F1LP46_RAT]	4.52	2	2	2	3	77.7783	7.10791	1.70265	1.75	1	1	2.14542	2.77	1	1	3.03754	1.75	1	1	686
F1LQC1	Acyl-coenzyme A oxidase OS=Rattus norvegicus GN=Acox1 PE=3 SV=2 - [F1LQC1_RAT]	7.58	4	3	3	3	74.5322	8.47021	2.95529	2.12	1	1	2.2414	1.82	1	1	2.8354	3.64	1	1	660
F1M3Z9	Uncharacterized protein (Fragment) OS=Rattus norvegicus PE=4 SV=1 - [F1M3Z9_RAT]	9.9	2	1	1	3	11.6232	9.08545	0	9.9	1	1	3.93954	9.9	1	2					101
F1M6C2	Elongation factor 1-alpha (Fragment) OS=Rattus norvegicus GN=LOC100360150 PE=3 SV=1 - [F1M6C2_RAT]	9.51	5	1	2	3	44.2748	7.97217	7.26749	9.51	2	3									410
G3V765	Envoplakin (Predicted) OS=Rattus norvegicus GN=Evpl PE=4 SV=1 - [G3V765_RAT]	0.34	1	1	1	3	230.971	6.58057	2.01518	0.34	1	1					3.89741	0.34	1	2	2029
G3V8F5	Mitochondrial import receptor subunit TOM40 homolog OS=Rattus norvegicus GN=Tomm40 PE=4 SV=1 - [G3V8F5_RAT]	6.93	2	2	2	3	37.8961	7.97217	2.18673	3.88	1	1	1.86105	3.05	1	1	1.90795	3.05	1	1	361
G3V9N2	Peroxisomal membrane protein 2 OS=Rattus norvegicus GN=Pxmp2 PE=4 SV=1 - [G3V9N2_RAT]	10.31	2	1	1	3	22.4632	10.1108	3.2562	10.31	1	1					6.42283	10.31	1	2	194
M0RC66	Adenylate kinase isoenzyme 1 (Fragment) OS=Rattus norvegicus GN=Ak1 PE=3 SV=1 - [M0RC66_RAT]	18.13	2	2	2	3	21.2782	9.15869	1.79102	6.22	1	1	2.32639	11.92	1	1	2.55994	11.92	1	1	193
M0RC99	Protein LOC100361891 OS=Rattus norvegicus GN=Rab5al1 PE=3 SV=1 - [M0RC99_RAT]	11.63	3	2	2	3	23.6098	8.14795	0	5.12	1	1	1.97438	5.12	1	1	0	6.51	1	1	215
Q0ZFS4	Mitochondrial ribosomal protein S33 (Predicted), isoform CRA_a OS=Rattus norvegicus GN=Mrps33 PE=4 SV=1 - [Q0ZFS4_RAT]	11.43	1	1	1	3	12.3645	10.2573	0	11.43	1	1	2.11054	11.43	1	1	2.1407	11.43	1	1	105
Q5XFW4	Mitochondrial ribosomal protein L13 OS=Rattus norvegicus GN=Mrpl13 PE=2 SV=1 - [Q5XFW4_RAT]	11.24	1	2	2	3	20.5276	9.15869	2.54761	5.62	1	1	1.84491	5.62	1	1	1.61434	5.62	1	1	178
P13832	Myosin regulatory light chain RLC-A OS=Rattus norvegicus GN=Rlc-a PE=2 SV=2 - [MRLCA_RAT]	22.67	3	3	3	3	19.8825	4.80518					6.98485	22.67	3	3					172
P10818	Cytochrome c oxidase subunit 6A1, mitochondrial OS=Rattus norvegicus GN=Cox6a1 PE=1 SV=2 - [CX6A1_RAT]	42.34	1	2	2	3	12.2933	9.31982					9.4663	42.34	2	3					111
Q6AYR6	Haloacid dehalogenase-like hydrolase domain-containing protein 2 OS=Rattus norvegicus GN=Hdhd2 PE=2 SV=1 - [HDHD2_RAT]	8.11	2	1	1	3	28.7611	5.99854					4.68847	8.11	1	1	6.90143	8.11	1	2	259
Q5FWT5	Glutamyl-tRNA(Gln) amidotransferase subunit A, mitochondrial OS=Rattus norvegicus GN=Qrsl1 PE=2 SV=1 - [GATA_RAT]	6.48	1	2	2	3	56.8018	5.90967					3.19624	3.43	1	1	5.56242	6.48	2	2	525
Q2PQA9	Kinesin-1 heavy chain OS=Rattus norvegicus GN=Kif5b PE=1 SV=1 - [KINH_RAT]	4.47	3	3	3	3	109.463	6.44287					4.31982	3.12	2	2	1.76676	1.35	1	1	963
Q7TS56	Carbonyl reductase family member 4 OS=Rattus norvegicus GN=Cbr4 PE=2 SV=1 - [CBR4_RAT]	16.95	2	3	3	3	25.2705	9.5835					4.47784	8.05	1	1	4.99639	8.9	2	2	236
Q5XIE3	39S ribosomal protein L11, mitochondrial OS=Rattus norvegicus GN=Mrpl11 PE=2 SV=1 - [RM11_RAT]	13.79	1	2	2	3	22.4065	10.2573					1.96521	5.42	1	1	4.66481	13.79	2	2	203
P22062	Protein-L-isoaspartate(D-aspartate) O-methyltransferase OS=Rattus norvegicus GN=Pcmt1 PE=1 SV=2 - [PIMT_RAT]	23.35	1	3	3	3	24.6257	7.6792					1.74758	4.85	1	1	3.16021	18.5	2	2	227
D3ZQU7	Protein Gp1ba OS=Rattus norvegicus GN=Gp1ba PE=4 SV=1 - [D3ZQU7_RAT]	4.32	1	2	2	3	78.222	5.56689					5.64394	4.32	2	2	3.19498	1.95	1	1	717
D4A478	Protein Ntpcr OS=Rattus norvegicus GN=Ntpcr PE=3 SV=1 - [D4A478_RAT]	19.79	1	2	2	3	20.8002	9.83252					3.73763	19.79	2	2	2.19448	8.85	1	1	192
F1M7K3	Myosin, light polypeptide 7, regulatory (Predicted), isoform CRA_a OS=Rattus norvegicus GN=Myl7 PE=4 SV=2 - [F1M7K3_RAT]	14.86	1	2	2	3	16.7201	4.41162					4.57029	8.11	1	2	1.8854	6.76	1	1	148
G3V7Q7	IQ motif containing GTPase activating protein 1 (Predicted), isoform CRA_b OS=Rattus norvegicus GN=Iqgap1 PE=4 SV=1 - [G3V7Q7_RAT]	1.03	1	1	1	3	188.714	6.43018					2.63976	1.03	1	1	5.8519	1.03	1	2	1657
M0RB74	Protein Ipo5 OS=Rattus norvegicus GN=Ipo5 PE=4 SV=1 - [M0RB74_RAT]	4.52	2	3	3	3	92.5085	4.98291					4.24065	2.81	2	2	2.48489	1.71	1	1	818
B2RYT7	Haloacid dehalogenase-like hydrolase domain containing 3 OS=Rattus norvegicus GN=Hdhd3 PE=2 SV=1 - [B2RYT7_RAT]	13.55	1	2	2	3	27.7763	7.00537									4.48311	13.55	2	3	251
P11232	Thioredoxin OS=Rattus norvegicus GN=Txn PE=1 SV=2 - [THIO_RAT]	20.95	2	2	2	2	11.6657	4.91943	3.19781	12.38	1	1					1.7951	8.57	1	1	105
Q9Z1H9	Protein kinase C delta-binding protein OS=Rattus norvegicus GN=Prkcdbp PE=1 SV=1 - [PRDBP_RAT]	4.18	1	1	1	2	27.8937	6.1001	3.58546	4.18	1	2									263
P47820	Angiotensin-converting enzyme OS=Rattus norvegicus GN=Ace PE=2 SV=1 - [ACE_RAT]	2.44	1	2	2	2	150.812	6.58057	1.6581	1.37	1	1	1.70055	1.07	1	1					1313
P13264	Glutaminase kidney isoform, mitochondrial OS=Rattus norvegicus GN=Gls PE=1 SV=2 - [GLSK_RAT]	2.37	1	1	1	2	73.9762	7.86963	2.95628	2.37	1	1					0	2.37	1	1	674
P07340	Sodium/potassium-transporting ATPase subunit beta-1 OS=Rattus norvegicus GN=Atp1b1 PE=1 SV=1 - [AT1B1_RAT]	8.22	1	2	2	2	35.179	8.646	2.82489	8.22	2	2									304
P15684	Aminopeptidase N OS=Rattus norvegicus GN=Anpep PE=1 SV=2 - [AMPN_RAT]	3.01	2	2	2	2	109.38	5.46533	2.89832	1.24	1	1	2.40323	1.76	1	1					965
Q8R431	Monoglyceride lipase OS=Rattus norvegicus GN=Mgll PE=1 SV=1 - [MGLL_RAT]	8.91	1	2	2	2	33.4782	7.37158	4.89498	8.91	2	2									303
Q6AYQ4	Transmembrane protein 109 OS=Rattus norvegicus GN=Tmem109 PE=2 SV=1 - [TM109_RAT]	4.94	1	1	1	2	26.2254	9.77393	0	4.94	1	1	2.83947	4.94	1	1					243
Q6P0K8	Junction plakoglobin OS=Rattus norvegicus GN=Jup PE=1 SV=1 - [PLAK_RAT]	5.1	1	2	2	2	81.7488	6.13818	5.25421	5.1	2	2									745
Q4QQW3	Hydroxyacid-oxoacid transhydrogenase, mitochondrial OS=Rattus norvegicus GN=Adhfe1 PE=1 SV=1 - [HOT_RAT]	7.71	1	2	2	2	50.1935	7.54736	2.00423	7.71	2	2									467
Q3B8P0	Presenilins-associated rhomboid-like protein, mitochondrial OS=Rattus norvegicus GN=Parl PE=2 SV=1 - [PARL_RAT]	5.31	2	1	1	2	42.0989	9.90576	5.74633	5.31	1	2									377
Q8CG45	Aflatoxin B1 aldehyde reductase member 2 OS=Rattus norvegicus GN=Akr7a2 PE=1 SV=2 - [ARK72_RAT]	4.09	1	1	1	2	40.6493	8.104	2.47982	4.09	1	1					3.79706	4.09	1	1	367
Q5XIC2	Evolutionarily conserved signaling intermediate in Toll pathway, mitochondrial OS=Rattus norvegicus GN=Ecsit PE=1 SV=1 - [ECSIT_RAT]	2.3	1	1	1	2	49.5881	6.43018	0	2.3	1	1	1.6996	2.3	1	1					434
Q91ZW6	Trimethyllysine dioxygenase, mitochondrial OS=Rattus norvegicus GN=Tmlhe PE=1 SV=2 - [TMLH_RAT]	5.94	2	2	2	2	49.5361	8.41162	3.58081	5.94	2	2									421
A6ZIQ8	Trimeric intracellular cation channel type A OS=Rattus norvegicus GN=Tmem38a PE=2 SV=1 - [TM38A_RAT]	3.7	2	1	1	2	33.2542	8.35303	4.59939	3.7	1	2									297
B0BN30	Mtch1 protein OS=Rattus norvegicus GN=Mtch1 PE=2 SV=1 - [B0BN30_RAT]	8.23	1	2	2	2	41.5653	9.31982	2.50311	8.23	2	2									389
B1WBX2	Protein Tmem69 OS=Rattus norvegicus GN=Tmem69 PE=2 SV=1 - [B1WBX2_RAT]	3.64	1	1	1	2	27.65	9.89111	1.62501	3.64	1	1	0	3.64	1	1					247
D3ZIN7	Mitochondrial ribosomal protein S23 (Predicted), isoform CRA_b OS=Rattus norvegicus GN=Mrps23 PE=4 SV=1 - [D3ZIN7_RAT]	5.65	1	1	1	2	20.3086	9.24658	0	5.65	1	1	2.17461	5.65	1	1					177
D3ZJ83	Protein Sco2 OS=Rattus norvegicus GN=Sco2 PE=4 SV=1 - [D3ZJ83_RAT]	3.89	1	1	1	2	29.136	7.62061	2.41715	3.89	1	1	1.81643	3.89	1	1					257
D4A4A9	Protein Mrpl19 OS=Rattus norvegicus GN=Mrpl19 PE=4 SV=1 - [D4A4A9_RAT]	7.53	1	2	2	2	33.6113	9.36377	3.49244	7.53	2	2									292
F1LP60	Moesin (Fragment) OS=Rattus norvegicus GN=Msn PE=2 SV=1 - [F1LP60_RAT]	3.3	3	2	2	2	67.6098	6.46826	4.06711	3.3	2	2									576
F1LST1	Fibronectin OS=Rattus norvegicus GN=Fn1 PE=2 SV=2 - [F1LST1_RAT]	0.7	6	1	1	2	202.425	5.38916	2.30292	0.7	1	1					0	0.7	1	1	1848
G3V9S6	Protein Ndufa1 OS=Rattus norvegicus GN=Ndufa1 PE=4 SV=2 - [G3V9S6_RAT]	14.29	1	1	1	2	8.14223	9.48096	4.60173	14.29	1	2									70
M0R515	Protein Nudt13 OS=Rattus norvegicus GN=Nudt13 PE=4 SV=1 - [M0R515_RAT]	6.25	1	2	2	2	39.3269	7.45947	5.67572	6.25	2	2									352
M0R5F9	Protein LOC100910864 OS=Rattus norvegicus GN=RGD1565119 PE=3 SV=1 - [M0R5F9_RAT]	6.38	2	1	1	2	33.7158	9.81787	3.65396	6.38	1	1	3.07995	6.38	1	1					298
M0R5H9	Uncharacterized protein OS=Rattus norvegicus PE=4 SV=1 - [M0R5H9_RAT]	3.13	1	1	1	2	34.4568	9.5542	0	3.13	1	2									319
M0R6M8	Uncharacterized protein (Fragment) OS=Rattus norvegicus GN=Lnpep PE=4 SV=1 - [M0R6M8_RAT]	3.8	3	1	1	2	38.2861	5.51611	3.97681	3.8	1	1	3.57326	3.8	1	1					342
M0RDY2	Protein Fam185a OS=Rattus norvegicus GN=Fam185a PE=4 SV=1 - [M0RDY2_RAT]	7.43	1	1	1	2	18.3383	6.75635	1.6454	7.43	1	1	2.5393	7.43	1	1					175
P28492-2	Isoform 2 of Glutaminase liver isoform, mitochondrial OS=Rattus norvegicus GN=Gls2 - [GLSL_RAT]	2.99	2	1	1	2	59.1657	6.81494	2.82485	2.99	1	1					2.0233	2.99	1	1	535
Q08415-2	Isoform 2 of Kynurenine--oxoglutarate transaminase 1, mitochondrial OS=Rattus norvegicus GN=Ccbl1 - [KAT1_RAT]	9.46	3	2	2	2	47.8419	6.84424	4.68014	9.46	2	2									423
Q32PX6	Protein Rhog OS=Rattus norvegicus GN=Rhog PE=2 SV=1 - [Q32PX6_RAT]	15.71	3	1	2	2	21.2949	8.11865	3.24663	9.95	1	1					2.08072	5.76	1	1	191
Q3B8P7	Protein 1700021F05Rik OS=Rattus norvegicus GN=LOC683897 PE=2 SV=1 - [Q3B8P7_RAT]	11.67	1	2	2	2	27.5045	9.23193	5.09523	11.67	2	2									240
Q4FZU0	Acid phosphatase 6, lysophosphatidic OS=Rattus norvegicus GN=Acp6 PE=2 SV=1 - [Q4FZU0_RAT]	7.51	1	2	2	2	47.2503	7.75244	4.09122	7.51	2	2									413
Q5XIA5	Coenzyme A synthase OS=Rattus norvegicus GN=Coasy PE=2 SV=1 - [Q5XIA5_RAT]	7.82	1	2	2	2	62.1487	7.29834	1.99004	2.13	1	1					2.1228	5.68	1	1	563
Q64559-1	Isoform 1 of Cytosolic acyl coenzyme A thioester hydrolase OS=Rattus norvegicus GN=Acot7 - [BACH_RAT]	3.55	3	1	1	2	37.5372	7.51807	3.86552	3.55	1	2									338
P05197	Elongation factor 2 OS=Rattus norvegicus GN=Eef2 PE=1 SV=4 - [EF2_RAT]	2.33	1	1	1	2	95.2229	6.82959					3.41802	2.33	1	1	3.53565	2.33	1	1	858
P19686	Guanylate cyclase soluble subunit alpha-3 OS=Rattus norvegicus GN=Gucy1a3 PE=1 SV=1 - [GCYA3_RAT]	1.74	2	1	1	2	77.5167	7.06396					3.98837	1.74	1	2					690
Q6MG21	Valine--tRNA ligase, mitochondrial OS=Rattus norvegicus GN=Vars2 PE=3 SV=1 - [SYVM_RAT]	1.31	1	1	1	2	118.819	7.31299					2.19007	1.31	1	1	2.58677	1.31	1	1	1065
Q5BJN5	Mitochondrial intermembrane space import and assembly protein 40 OS=Rattus norvegicus GN=Chchd4 PE=2 SV=1 - [MIA40_RAT]	16.55	1	1	1	2	15.4568	4.32275					3.98912	16.55	1	1	3.90806	16.55	1	1	139
P04639	Apolipoprotein A-I OS=Rattus norvegicus GN=Apoa1 PE=1 SV=2 - [APOA1_RAT]	11.97	1	2	2	2	30.0432	5.74463					4.84493	11.97	2	2					259
Q5XIH4	Lipoyl synthase, mitochondrial OS=Rattus norvegicus GN=Lias PE=2 SV=1 - [LIAS_RAT]	2.95	1	1	1	2	41.8474	8.646					0	2.95	1	1	2.40537	2.95	1	1	373
Q5RK00	39S ribosomal protein L46, mitochondrial OS=Rattus norvegicus GN=Mrpl46 PE=2 SV=1 - [RM46_RAT]	3.25	1	1	1	2	31.6535	7.44482					1.86027	3.25	1	1	1.73714	3.25	1	1	277
D3Z9R8	6.8 kDa mitochondrial proteolipid OS=Rattus norvegicus GN=Mp68 PE=1 SV=1 - [68MP_RAT]	18.33	1	1	1	2	6.90965	9.92041					4.04739	18.33	1	2					60
Q9JKW1	Mitochondrial import inner membrane translocase subunit Tim22 OS=Rattus norvegicus GN=Timm22 PE=2 SV=2 - [TIM22_RAT]	8.33	1	1	1	2	19.9049	8.23584					5.3724	8.33	1	2					192
D4ACN8	Plasminogen receptor (KT) OS=Rattus norvegicus GN=Plgrkt PE=1 SV=1 - [PLRKT_RAT]	15.65	1	2	2	2	17.301	9.49561					0	8.84	1	1	2.41998	6.8	1	1	147
B5DFN3	Mitochondrial nucleoid factor 1 OS=Rattus norvegicus GN=Mnf1 PE=2 SV=1 - [MNF1_RAT]	21.32	2	2	2	2	16.3203	9.23193					5.72134	21.32	2	2					136
B0BNJ4	Ethylmalonic encephalopathy 1 OS=Rattus norvegicus GN=Ethe1 PE=2 SV=1 - [B0BNJ4_RAT]	11.81	1	2	2	2	27.659	7.06396					2.61478	3.94	1	1	2.49075	7.87	1	1	254
D4A4W6	Protein Slirp OS=Rattus norvegicus GN=Slirp PE=4 SV=1 - [D4A4W6_RAT]	24.32	1	2	2	2	12.5684	7.6499					2.14605	11.71	1	1	2.19804	12.61	1	1	111
D4ABS5	Protein Pithd1 OS=Rattus norvegicus GN=Pithd1 PE=4 SV=1 - [D4ABS5_RAT]	3.18	1	1	1	2	25.1914	6.27783					1.91568	3.18	1	1	1.92512	3.18	1	1	220
D4ACY1	Protein RGD1565784 OS=Rattus norvegicus GN=RGD1565784 PE=4 SV=1 - [D4ACY1_RAT]	18.38	1	1	1	2	15.6489	4.95752					3.64416	18.38	1	1	3.89052	18.38	1	1	136
F6Q5K7	Mitochondrial ribosomal protein S18B, isoform CRA_a OS=Rattus norvegicus GN=Mrps18b PE=4 SV=1 - [F6Q5K7_RAT]	5.84	1	1	1	2	29.1406	8.80713					2.85777	5.84	1	1	3.26052	5.84	1	1	257
M0R6L8	Protein RGD1560220 OS=Rattus norvegicus GN=RGD1560220 PE=4 SV=1 - [M0R6L8_RAT]	7.87	1	1	1	2	19.3508	8.89502					1.66233	7.87	1	1	0	7.87	1	1	178
M0R9D5	Protein Ahnak OS=Rattus norvegicus GN=Ahnak PE=4 SV=1 - [M0R9D5_RAT]	3.36	1	1	1	2	571.304	6.22705					3.00087	3.36	1	1	2.09254	3.36	1	1	5363
Q9Z2S9-3	Isoform 4 of Flotillin-2 OS=Rattus norvegicus GN=Flot2 - [FLOT2_RAT]	3.69	3	1	1	2	41.7252	5.2876					2.01397	3.69	1	1	1.93227	3.69	1	1	379
R9PXS3	Transcription elongation factor, mitochondrial (Fragment) OS=Rattus norvegicus GN=Tefm PE=4 SV=1 - [R9PXS3_RAT]	10.06	2	2	2	2	40.7238	9.65674					2.60943	4.75	1	1	2.7699	5.31	1	1	358
Q6PEC0	Bis(5'-nucleosyl)-tetraphosphatase [asymmetrical] OS=Rattus norvegicus GN=Nudt2 PE=2 SV=3 - [AP4A_RAT]	16.33	1	1	1	2	16.9186	5.52881									5.11821	16.33	1	2	147
Q5BJS4	FUN14 domain-containing protein 1 OS=Rattus norvegicus GN=Fundc1 PE=2 SV=1 - [FUND1_RAT]	10.97	1	1	1	2	17.1478	8.63135									6.45555	10.97	1	2	155
D3ZFQ3	Protein Nubpl OS=Rattus norvegicus GN=Nubpl PE=4 SV=1 - [D3ZFQ3_RAT]	6.27	1	1	1	2	34.0609	8.52881									2.57083	6.27	1	2	319
P11348	Dihydropteridine reductase OS=Rattus norvegicus GN=Qdpr PE=1 SV=1 - [DHPR_RAT]	5.39	1	1	1	1	25.5359	7.81104	1.89351	5.39	1	1									241
P01836	Ig kappa chain C region, A allele OS=Rattus norvegicus PE=1 SV=1 - [KACA_RAT]	10.38	1	1	1	1	11.7246	5.16064	2.12893	10.38	1	1									106
P18665	39S ribosomal protein L3, mitochondrial OS=Rattus norvegicus GN=Mrpl3 PE=3 SV=1 - [RM03_RAT]	4.32	2	1	1	1	38.2289	9.59814	2.48629	4.32	1	1									347
P63081	V-type proton ATPase 16 kDa proteolipid subunit OS=Rattus norvegicus GN=Atp6v0c PE=2 SV=1 - [VATL_RAT]	11.61	1	1	1	1	15.7975	9.12939	2.57823	11.61	1	1									155
P48675	Desmin OS=Rattus norvegicus GN=Des PE=1 SV=2 - [DESM_RAT]	2.99	2	1	1	1	53.424	5.2749	2.02705	2.99	1	1									469
P08009	Glutathione S-transferase Yb-3 OS=Rattus norvegicus GN=Gstm3 PE=1 SV=2 - [GSTM4_RAT]	7.8	3	1	1	1	25.664	7.32764	3.0863	7.8	1	1									218
P52296	Importin subunit beta-1 OS=Rattus norvegicus GN=Kpnb1 PE=1 SV=1 - [IMB1_RAT]	1.71	2	1	1	1	97.062	4.76709	2.62506	1.71	1	1									875
P18484	AP-2 complex subunit alpha-2 OS=Rattus norvegicus GN=Ap2a2 PE=1 SV=3 - [AP2A2_RAT]	2.99	2	1	1	1	103.979	6.93213	2.54686	2.99	1	1									938
P70623	Fatty acid-binding protein, adipocyte OS=Rattus norvegicus GN=Fabp4 PE=2 SV=3 - [FABP4_RAT]	9.09	2	1	1	1	14.6986	7.94287	2.78271	9.09	1	1									132
Q9Z1E1	Flotillin-1 OS=Rattus norvegicus GN=Flot1 PE=2 SV=2 - [FLOT1_RAT]	2.57	1	1	1	1	47.4696	7.15186	0	2.57	1	1									428
P35559	Insulin-degrading enzyme OS=Rattus norvegicus GN=Ide PE=1 SV=1 - [IDE_RAT]	1.47	1	1	1	1	117.635	6.60986	1.61377	1.47	1	1									1019
P62250	40S ribosomal protein S16 OS=Rattus norvegicus GN=Rps16 PE=1 SV=2 - [RS16_RAT]	7.53	1	1	1	1	16.435	10.2134	2.0443	7.53	1	1									146
Q7TPB1	T-complex protein 1 subunit delta OS=Rattus norvegicus GN=Cct4 PE=1 SV=3 - [TCPD_RAT]	2.41	1	1	1	1	58.0628	8.01611	2.09942	2.41	1	1									539
P25235	Dolichyl-diphosphooligosaccharide--protein glycosyltransferase subunit 2 OS=Rattus norvegicus GN=Rpn2 PE=2 SV=2 - [RPN2_RAT]	1.43	1	1	1	1	69.035	5.97314	0	1.43	1	1									631
Q6AYT0	Quinone oxidoreductase OS=Rattus norvegicus GN=Cryz PE=2 SV=1 - [QOR_RAT]	4.26	1	1	1	1	34.9531	8.22119	2.34329	4.26	1	1									329
Q63081	Protein disulfide-isomerase A6 OS=Rattus norvegicus GN=Pdia6 PE=1 SV=2 - [PDIA6_RAT]	3.41	1	1	1	1	48.1433	5.13525	2.55255	3.41	1	1									440
Q5HZE0	Mitochondrial carnitine/acylcarnitine carrier protein CACL OS=Rattus norvegicus GN=Slc25a29 PE=2 SV=1 - [MCATL_RAT]	3.59	1	1	1	1	32.6138	8.45557	2.31015	3.59	1	1									306
Q4V7F3	Probable tRNA threonylcarbamoyladenosine biosynthesis protein Osgepl1 OS=Rattus norvegicus GN=Osgepl1 PE=2 SV=1 - [OSGP2_RAT]	4.11	1	1	1	1	44.8229	8.70459	3.02328	4.11	1	1									414
Q5XII0	Mammalian ependymin-related protein 1 OS=Rattus norvegicus GN=Epdr1 PE=2 SV=1 - [EPDR1_RAT]	4.91	1	1	1	1	25.6229	7.57666	2.24786	4.91	1	1									224
Q5U2V4	Phospholipase B-like 1 OS=Rattus norvegicus GN=Plbd1 PE=2 SV=1 - [PLBL1_RAT]	2.18	1	1	1	1	62.9867	8.60205	2.17826	2.18	1	1									550
Q9Z1X1	Extended synaptotagmin-1 OS=Rattus norvegicus GN=Esyt1 PE=2 SV=1 - [ESYT1_RAT]	1.19	1	1	1	1	121.084	5.69385	1.82254	1.19	1	1									1088
Q5M818	39S ribosomal protein L16, mitochondrial OS=Rattus norvegicus GN=Mrpl16 PE=2 SV=1 - [RM16_RAT]	3.98	1	1	1	1	28.8762	10.3159	1.82277	3.98	1	1									251
D3Z8L7	Ras-related protein R-Ras OS=Rattus norvegicus GN=Rras PE=1 SV=1 - [RRAS_RAT]	5.5	1	1	1	1	23.8942	7.34229	0	5.5	1	1									218
B0BN56	28S ribosomal protein S31, mitochondrial OS=Rattus norvegicus GN=Mrps31 PE=2 SV=1 - [RT31_RAT]	3.1	1	1	1	1	43.9345	8.27979	1.76582	3.1	1	1									387
Q5PQN9	39S ribosomal protein L38, mitochondrial OS=Rattus norvegicus GN=Mrpl38 PE=2 SV=2 - [RM38_RAT]	2.37	1	1	1	1	44.8095	7.88428	2.02254	2.37	1	1									380
A4F267	Mitochondrial import receptor subunit TOM40B OS=Rattus norvegicus GN=Tomm40l PE=1 SV=1 - [TM40L_RAT]	5.19	1	1	1	1	34.0273	7.10791	3.39181	5.19	1	1									308
B2RYW8	Mitochondrial inner membrane organizing system protein 1 OS=Rattus norvegicus GN=Minos1 PE=3 SV=1 - [MOS1_RAT]	10.53	1	1	1	1	8.54423	9.24658	0	10.53	1	1									76
B0BNF6	Membrane-associated ring finger (C3HC4) 5 OS=Rattus norvegicus GN=March5 PE=2 SV=1 - [B0BNF6_RAT]	5.76	1	1	1	1	31.2112	8.70459	2.30721	5.76	1	1									278
B2RYT0	Mitochondrial ribosomal protein S21 (Predicted), isoform CRA_a OS=Rattus norvegicus GN=Mrps21 PE=4 SV=1 - [B2RYT0_RAT]	13.79	2	1	1	1	10.5935	10.3745	2.47549	13.79	1	1									87
B2RYW4	Mitochondrial ribosomal protein L53 OS=Rattus norvegicus GN=Mrpl53 PE=4 SV=1 - [B2RYW4_RAT]	15.13	1	1	1	1	12.7266	9.84717	3.4065	15.13	1	1									119
B2RZD2	Transmembrane protein 126B OS=Rattus norvegicus GN=Tmem126b PE=1 SV=2 - [T126B_RAT]	5.24	1	1	1	1	25.1971	9.23193	3.11103	5.24	1	1									229
B4F7A5	Cd99 protein OS=Rattus norvegicus GN=Cd99 PE=2 SV=1 - [B4F7A5_RAT]	11.52	1	1	1	1	16.5784	5.12256	4.07143	11.52	1	1									165
D3ZAN3	Alpha glucosidase 2 alpha neutral subunit (Predicted) OS=Rattus norvegicus GN=Ganab PE=4 SV=1 - [D3ZAN3_RAT]	1.88	1	1	1	1	90.5149	6.20166	4.32224	1.88	1	1									797
D3ZDQ9	Protein Sgca OS=Rattus norvegicus GN=Sgca PE=4 SV=1 - [D3ZDQ9_RAT]	2.58	1	1	1	1	43.1293	6.62451	0	2.58	1	1									387
D3ZEG8	Protein RGD1309188 OS=Rattus norvegicus GN=RGD1309188 PE=4 SV=1 - [D3ZEG8_RAT]	5.24	1	1	1	1	29.8543	8.03076	0	5.24	1	1									267
D3ZQ57	Plexin B2 OS=Rattus norvegicus GN=Plxnb2 PE=4 SV=1 - [D3ZQ57_RAT]	0.6	1	1	1	1	205.818	5.98584	2.17583	0.6	1	1									1841
D3ZQV0	Protein LOC100365995 OS=Rattus norvegicus GN=LOC100365995 PE=3 SV=1 - [D3ZQV0_RAT]	8.13	2	1	1	1	26.2489	5.32568	2.87757	8.13	1	1									246
D3ZSS5	Protein Gnat1 OS=Rattus norvegicus GN=Gnat1 PE=4 SV=1 - [D3ZSS5_RAT]	2.29	7	1	1	1	39.927	5.61768	1.68995	2.29	1	1									350
D3ZVN7	Orexin OS=Rattus norvegicus GN=Ppox PE=4 SV=1 - [D3ZVN7_RAT]	2.52	1	1	1	1	50.7527	8.36768	1.88635	2.52	1	1									477
D3ZWW5	Protein Slc30a9 OS=Rattus norvegicus GN=Slc30a9 PE=4 SV=1 - [D3ZWW5_RAT]	3.17	1	1	1	1	62.6445	8.48486	3.34406	3.17	1	1									567
D4A414	COX15 homolog, cytochrome c oxidase assembly protein (Yeast), isoform CRA_a OS=Rattus norvegicus GN=Cox15 PE=3 SV=1 - [D4A414_RAT]	3.38	1	1	1	1	45.8843	9.83252	2.36864	3.38	1	1									414
D4A628	Polymerase (DNA directed), theta (Predicted), isoform CRA_a OS=Rattus norvegicus GN=Polq PE=4 SV=1 - [D4A628_RAT]	0.94	1	1	1	1	281.475	6.94678	2.299	0.94	1	1									2547
D4A742	Protein LOC100910944 OS=Rattus norvegicus GN=Romo1 PE=4 SV=1 - [D4A742_RAT]	12.66	1	1	1	1	8.17686	9.33447	0	12.66	1	1									79
D4A7X1	Protein Mrps16 OS=Rattus norvegicus GN=Mrps16 PE=3 SV=1 - [D4A7X1_RAT]	13.33	1	1	1	1	15.2338	9.49561	2.45795	13.33	1	1									135
D4A8H8	Cytoplasmic FMR1 interacting protein 1 (Predicted) OS=Rattus norvegicus GN=Cyfip1 PE=4 SV=1 - [D4A8H8_RAT]	1.12	1	1	1	1	145.164	6.90283	3.29898	1.12	1	1									1253
D4A9Q3	Protein RGD1563570 OS=Rattus norvegicus GN=RGD1563570 PE=3 SV=1 - [D4A9Q3_RAT]	7.69	3	1	1	1	15.7235	10.0815	2.0879	7.69	1	1									143
D4A9Z6	Mitochondrial ribosomal protein S35 (Predicted) OS=Rattus norvegicus GN=Mrps35 PE=4 SV=1 - [D4A9Z6_RAT]	4.06	1	1	1	1	36.1838	9.15869	2.14234	4.06	1	1									320
D4AAV6	Protein Pdcd1lg2 OS=Rattus norvegicus GN=Pdcd1lg2 PE=4 SV=2 - [D4AAV6_RAT]	10.07	1	1	1	1	29.9808	8.83643	0	10.07	1	1									268
D4ABR6	Annexin (Fragment) OS=Rattus norvegicus GN=Anxa6 PE=2 SV=2 - [D4ABR6_RAT]	2.38	2	1	1	1	75.5565	5.68115	2.27573	2.38	1	1									671
D4AEG6	Mitochondrial ribosomal protein L32 (Predicted) OS=Rattus norvegicus GN=Mrpl32 PE=4 SV=1 - [D4AEG6_RAT]	9.63	1	1	1	1	21.5872	9.67139	2.4937	9.63	1	1									187
E9PTK4	Protein Thnsl1 OS=Rattus norvegicus GN=Thnsl1 PE=2 SV=1 - [E9PTK4_RAT]	1.34	1	1	1	1	82.6572	7.1665	1.75013	1.34	1	1									745
E9PTV0	Guanylate kinase 1, isoform CRA_a OS=Rattus norvegicus GN=Guk1 PE=4 SV=2 - [E9PTV0_RAT]	5.48	1	1	1	1	24.0373	6.15088	1.70742	5.48	1	1									219
F1LP82	Ras-related protein Rab-2A (Fragment) OS=Rattus norvegicus GN=Rab2a PE=2 SV=2 - [F1LP82_RAT]	7.14	2	1	1	1	21.6828	6.53662	3.1588	7.14	1	1									196
F1LQJ7	Protein Pck2 OS=Rattus norvegicus GN=Pck2 PE=2 SV=2 - [F1LQJ7_RAT]	2.18	1	1	1	1	71.1611	8.33838	2.09768	2.18	1	1									641
F1LQS6	RCG61833 OS=Rattus norvegicus GN=Xdh PE=4 SV=2 - [F1LQS6_RAT]	0.98	2	1	1	1	146.171	7.25439	1.83764	0.98	1	1									1331
F1LRE1	Glutathione reductase OS=Rattus norvegicus GN=Gsr PE=4 SV=2 - [F1LRE1_RAT]	2.93	2	1	1	1	44.761	7.10791	2.18991	2.93	1	1									410
F1LS40	Collagen alpha-2(I) chain OS=Rattus norvegicus GN=Col1a2 PE=2 SV=2 - [F1LS40_RAT]	0.66	2	1	1	1	129.759	9.21729	1.95535	0.66	1	1									1372
F1LZF4	Protein Col6a5 OS=Rattus norvegicus GN=Col6a5 PE=2 SV=2 - [F1LZF4_RAT]	0.34	1	1	1	1	287.251	6.46826	1.65147	0.34	1	1									2616
F1M566	Protein Hspg2 (Fragment) OS=Rattus norvegicus GN=Hspg2 PE=2 SV=2 - [F1M566_RAT]	0.55	1	1	1	1	230.697	6.94678	2.06003	0.55	1	1									2165
F1M9X7	Calcium channel, voltage-dependent, alpha 2/delta subunit 2 OS=Rattus norvegicus GN=Cacna2d2 PE=4 SV=2 - [F1M9X7_RAT]	0.95	2	1	1	1	130.695	5.66846	2.87189	0.95	1	1									1157
F7EMK8	Protein Akr1b10 (Fragment) OS=Rattus norvegicus GN=Akr1b10 PE=4 SV=1 - [F7EMK8_RAT]	3.05	2	1	1	1	33.7455	7.23975	0	3.05	1	1									295
M0R9F5	Protein LOC100360872 OS=Rattus norvegicus GN=Mcpt1l1 PE=3 SV=1 - [M0R9F5_RAT]	8.5	3	1	1	1	27.2883	9.64209	2.26183	8.5	1	1									247
M0RBJ7	Complement C3 OS=Rattus norvegicus GN=C3 PE=4 SV=1 - [M0RBJ7_RAT]	0.84	3	1	1	1	186.118	6.46826	1.75111	0.84	1	1									1662
M0RDI5	Protein Mcu OS=Rattus norvegicus GN=Mcu PE=4 SV=1 - [M0RDI5_RAT]	5.43	1	1	1	1	39.7326	8.55811	2.21693	5.43	1	1									350
P0DKR2	T-cell activation inhibitor, mitochondrial OS=Rattus norvegicus GN=Tcaim PE=2 SV=1 - [TCAIM_RAT]	2.97	1	1	1	1	58.3758	9.18799	2.52702	2.97	1	1									505
Q05BA4	Myadm protein OS=Rattus norvegicus GN=Myadm PE=2 SV=1 - [Q05BA4_RAT]	4.09	2	1	1	1	35.0951	8.30908	2.27012	4.09	1	1									318
Q4KLZ0	Protein Vnn1 OS=Rattus norvegicus GN=Vnn1 PE=2 SV=1 - [Q4KLZ0_RAT]	2.34	1	1	1	1	56.9765	5.5542	1.63085	2.34	1	1									512
Q68FP1-2	Isoform 2 of Gelsolin OS=Rattus norvegicus GN=Gsn - [GELS_RAT]	1.78	2	1	1	1	80.8784	5.69385	0	1.78	1	1									731
Q6P9V1	CD81 antigen OS=Rattus norvegicus GN=Cd81 PE=2 SV=1 - [Q6P9V1_RAT]	9.75	1	1	1	1	25.8871	5.51611	0	9.75	1	1									236
Q7TPA1	Ab1-114 OS=Rattus norvegicus GN=Slc25a15 PE=2 SV=1 - [Q7TPA1_RAT]	3.85	1	1	1	1	36.8969	8.96826	2.32345	3.85	1	1									338
Q9Z269	Vesicle-associated membrane protein-associated protein B OS=Rattus norvegicus GN=Vapb PE=1 SV=3 - [VAPB_RAT]	5.76	1	1	1	1	26.899	7.78174					0	5.76	1	1					243
P0C5H9	Mesencephalic astrocyte-derived neurotrophic factor OS=Rattus norvegicus GN=Manf PE=1 SV=1 - [MANF_RAT]	7.82	1	1	1	1	20.3746	8.25049					2.11881	7.82	1	1					179
Q63707	Dihydroorotate dehydrogenase (quinone), mitochondrial OS=Rattus norvegicus GN=Dhodh PE=1 SV=1 - [PYRD_RAT]	2.53	1	1	1	1	42.6369	9.45166					0	2.53	1	1					395
P12392	Neuronal acetylcholine receptor subunit beta-4 OS=Rattus norvegicus GN=Chrnb4 PE=2 SV=1 - [ACHB4_RAT]	1.62	3	1	1	1	55.825	7.06396					1.73386	1.62	1	1					495
P56522	NADPH:adrenodoxin oxidoreductase, mitochondrial OS=Rattus norvegicus GN=Fdxr PE=1 SV=1 - [ADRO_RAT]	4.45	1	1	1	1	54.3287	9.23193					2.04128	4.45	1	1					494
P62914	60S ribosomal protein L11 OS=Rattus norvegicus GN=Rpl11 PE=1 SV=2 - [RL11_RAT]	7.87	1	1	1	1	20.2396	9.59814					1.75968	7.87	1	1					178
Q5XI79	NADH dehydrogenase [ubiquinone] complex I, assembly factor 7 OS=Rattus norvegicus GN=Ndufaf7 PE=2 SV=1 - [NDUF7_RAT]	3.67	1	1	1	1	48.6848	6.72705					2.64069	3.67	1	1					436
Q4FZX5	Methionine-R-sulfoxide reductase B2, mitochondrial OS=Rattus norvegicus GN=Msrb2 PE=2 SV=1 - [MSRB2_RAT]	6.32	1	1	1	1	19.0604	8.93896					2.06404	6.32	1	1					174
Q4KM98	Mitochondrial fission factor OS=Rattus norvegicus GN=Mff PE=2 SV=1 - [MFF_RAT]	5.5	1	1	1	1	24.9549	5.57959					2.81297	5.5	1	1					218
Q32PX9	Lactation elevated protein 1 OS=Rattus norvegicus GN=Lace1 PE=2 SV=1 - [LACE1_RAT]	3.54	1	1	1	1	54.468	8.42627					0	3.54	1	1					480
P0C2C1	39S ribosomal protein L30, mitochondrial OS=Rattus norvegicus GN=Mrpl30 PE=1 SV=1 - [RM30_RAT]	11.88	1	1	1	1	18.4	10.3452					3.80209	11.88	1	1					160
Q6AXT5	Ras-related protein Rab-21 OS=Rattus norvegicus GN=Rab21 PE=2 SV=1 - [RAB21_RAT]	5.83	1	1	1	1	24.1482	7.94287					1.70636	5.83	1	1					223
O35567	Bifunctional purine biosynthesis protein PURH OS=Rattus norvegicus GN=Atic PE=1 SV=2 - [PUR9_RAT]	2.87	1	1	1	1	64.1682	7.13721					3.46142	2.87	1	1					592
Q6IRK9	Carboxypeptidase Q OS=Rattus norvegicus GN=Cpq PE=1 SV=1 - [CBPQ_RAT]	2.75	1	1	1	1	52.0086	6.41748					2.62697	2.75	1	1					472
Q1HCL7	NAD kinase 2, mitochondrial OS=Rattus norvegicus GN=Nadk2 PE=2 SV=1 - [NAKD2_RAT]	3.29	1	1	1	1	48.0866	6.94678					2.58578	3.29	1	1					425
A2VD12	Pre-B-cell leukemia transcription factor-interacting protein 1 OS=Rattus norvegicus GN=Pbxip1 PE=2 SV=1 - [PBIP1_RAT]	2.08	1	1	1	1	80.2269	5.41455					2.38457	2.08	1	1					722
B0BMT9	Protein Sqrdl OS=Rattus norvegicus GN=Sqrdl PE=2 SV=1 - [B0BMT9_RAT]	2.22	1	1	1	1	50.1698	9.0708					2.6267	2.22	1	1					450
B0BNI6	Protein Slc25a35 OS=Rattus norvegicus GN=Slc25a35 PE=2 SV=1 - [B0BNI6_RAT]	3.67	1	1	1	1	32.4707	9.5835					1.77597	3.67	1	1					300
B2RYV0	DnaJ (Hsp40) homolog, subfamily C, member 30 OS=Rattus norvegicus GN=Dnajc30 PE=2 SV=1 - [B2RYV0_RAT]	6.39	1	1	1	1	24.908	10.3452					2.40275	6.39	1	1					219
D3Z8C5	Protein Brwd3 OS=Rattus norvegicus GN=Brwd3 PE=4 SV=2 - [D3Z8C5_RAT]	0.56	1	1	1	1	202.84	7.86963					1.64797	0.56	1	1					1800
D3Z9K2	Mitochondrial ribosomal protein L54 (Predicted) OS=Rattus norvegicus GN=Mrpl54 PE=4 SV=1 - [D3Z9K2_RAT]	19.26	1	1	1	1	15.2771	9.62744					2.55761	19.26	1	1					135
D3ZB55	Protein Coa5 OS=Rattus norvegicus GN=Coa5 PE=4 SV=1 - [D3ZB55_RAT]	24.32	1	1	1	1	8.35304	8.70459					3.16677	24.32	1	1					74
D3ZD23	ATP-binding cassette, sub-family E (OABP), member 1 OS=Rattus norvegicus GN=Abce1 PE=3 SV=1 - [D3ZD23_RAT]	2	1	1	1	1	67.257	8.33838					0	2	1	1					599
D3ZDX7	Mitochondrial ribosomal protein L48 (Predicted), isoform CRA_c OS=Rattus norvegicus GN=Mrpl48 PE=4 SV=1 - [D3ZDX7_RAT]	5.21	1	1	1	1	24.0038	9.51025					2.36166	5.21	1	1					211
D3ZFA8	Protein LOC100362366 OS=Rattus norvegicus GN=LOC100364909 PE=3 SV=1 - [D3ZFA8_RAT]	7.41	5	1	1	1	15.4583	9.77393					2.10034	7.41	1	1					135
D3ZHF8	Translation factor Guf1, mitochondrial OS=Rattus norvegicus GN=Guf1 PE=3 SV=1 - [D3ZHF8_RAT]	2.28	1	1	1	1	73.1609	8.85107					1.64916	2.28	1	1					659
D3ZPF2	Protein Mcat OS=Rattus norvegicus GN=Mcat PE=4 SV=1 - [D3ZPF2_RAT]	3.68	1	1	1	1	41.8051	8.08936					2.15991	3.68	1	1					380
D3ZRJ0	AarF domain containing kinase 1 (Predicted) OS=Rattus norvegicus GN=Adck1 PE=4 SV=1 - [D3ZRJ0_RAT]	2.86	1	1	1	1	51.6777	8.26514					1.86724	2.86	1	1					455
D3ZSK9	Protein RGD1309779 OS=Rattus norvegicus GN=RGD1309779 PE=2 SV=2 - [D3ZSK9_RAT]	7.05	1	1	1	1	17.9191	9.5249					2.19721	7.05	1	1					156
D3ZUY0	Protein Rdh14 OS=Rattus norvegicus GN=Rdh14 PE=3 SV=1 - [D3ZUY0_RAT]	3.89	1	1	1	1	36.1729	8.08936					1.71393	3.89	1	1					334
D3ZY44	Protein Mrps2 OS=Rattus norvegicus GN=Mrps2 PE=3 SV=1 - [D3ZY44_RAT]	6.87	1	1	1	1	32.1556	9.15869					2.61098	6.87	1	1					291
D3ZYL4	Mitochondrial ribosomal protein L50 (Predicted) OS=Rattus norvegicus GN=Mrpl50 PE=4 SV=1 - [D3ZYL4_RAT]	10.69	1	1	1	1	18.3075	8.99756					2.40092	10.69	1	1					159
D4A040	Protein Mrps11 OS=Rattus norvegicus GN=Mrps11 PE=3 SV=1 - [D4A040_RAT]	5.24	1	1	1	1	20.1556	10.7993					1.93315	5.24	1	1					191
D4A3E8	Mitochondrial ribosomal protein S27 (Predicted), isoform CRA_b OS=Rattus norvegicus GN=Mrps27 PE=4 SV=1 - [D4A3E8_RAT]	2.65	1	1	1	1	47.618	5.32568					2.23631	2.65	1	1					415
D4A4V1	Mitochondrial ribosomal protein S18C (Predicted), isoform CRA_a OS=Rattus norvegicus GN=Mrps18c PE=3 SV=1 - [D4A4V1_RAT]	13.29	1	1	1	1	16.3604	9.45166					3.32073	13.29	1	1					143
D4A6D7-2	Isoform 2 of Tetratricopeptide repeat protein 19, mitochondrial OS=Rattus norvegicus GN=Ttc19 - [TTC19_RAT]	2.84	2	1	1	1	39.8495	6.21436					2.08093	2.84	1	1					352
D4AEL8	5-azacytidine induced gene 1 (Predicted), isoform CRA_a OS=Rattus norvegicus GN=Azi1 PE=4 SV=1 - [D4AEL8_RAT]	0.84	1	1	1	1	121.771	8.68994					0	0.84	1	1					1069
E9PT65	Protein Rdx OS=Rattus norvegicus GN=Rdx PE=2 SV=1 - [E9PT65_RAT]	2.58	1	1	1	1	68.3481	5.98584					0	2.58	1	1					582
F1LMA7	C-type mannose receptor 2 OS=Rattus norvegicus GN=Mrc2 PE=2 SV=1 - [F1LMA7_RAT]	0.88	2	1	1	1	166.93	5.99854					2.40457	0.88	1	1					1480
F1LN65	Protein FAM105A OS=Rattus norvegicus GN=Fam105a PE=4 SV=2 - [F1LN65_RAT]	6.06	2	1	1	1	34.8929	9.51025					3.91176	6.06	1	1					297
F1LZX9	Protein Itgav OS=Rattus norvegicus GN=Itgav PE=3 SV=2 - [F1LZX9_RAT]	1.34	1	1	1	1	114.739	6.07471					3.43917	1.34	1	1					1042
F1M790	Prostaglandin F2 receptor negative regulator (Fragment) OS=Rattus norvegicus GN=Ptgfrn PE=2 SV=2 - [F1M790_RAT]	1.14	2	1	1	1	98.5715	6.56592					0	1.14	1	1					878
F1M955	Caseinolytic peptidase B protein homolog OS=Rattus norvegicus GN=Clpb PE=2 SV=2 - [F1M955_RAT]	2.36	2	1	1	1	75.6343	8.45557					2.55352	2.36	1	1					677
F1M983	Protein Cfh OS=Rattus norvegicus GN=Cfh PE=2 SV=1 - [F1M983_RAT]	1.38	2	1	1	1	139.916	6.87354					0	1.38	1	1					1234
F7EVC6	Protein Hebp1 OS=Rattus norvegicus GN=Hebp1 PE=4 SV=1 - [F7EVC6_RAT]	12.12	1	1	1	1	14.5843	5.10986					2.59711	12.12	1	1					132
F7FLF2	Protein LOC100360057 (Fragment) OS=Rattus norvegicus GN=Rpl22 PE=4 SV=1 - [F7FLF2_RAT]	10.24	2	1	1	1	14.6487	9.18799					0	10.24	1	1					127
G3V8F9	Alpha-methylacyl-CoA racemase OS=Rattus norvegicus GN=Amacr PE=4 SV=1 - [G3V8F9_RAT]	4.19	3	1	1	1	41.7255	6.68311					3.13092	4.19	1	1					382
G3V928	Protein Lrp1 OS=Rattus norvegicus GN=Lrp1 PE=4 SV=1 - [G3V928_RAT]	0.31	1	1	1	1	504.558	5.36377					3.12901	0.31	1	1					4545
M0R5K9	Protein LOC100912024 (Fragment) OS=Rattus norvegicus GN=LOC100912024 PE=3 SV=1 - [M0R5K9_RAT]	5.3	4	1	1	1	17.6438	11.1069					1.91585	5.3	1	1					151
O89035	Mitochondrial dicarboxylate carrier OS=Rattus norvegicus GN=Slc25a10 PE=2 SV=1 - [O89035_RAT]	8.39	1	1	1	1	31.4341	9.29053					3.72845	8.39	1	1					286
P97541	Heat shock protein beta-6 OS=Rattus norvegicus GN=Hspb6 PE=1 SV=1 - [HSPB6_RAT]	15.43	1	1	1	1	17.4941	6.52197									2.53917	15.43	1	1	162
P61983	14-3-3 protein gamma OS=Rattus norvegicus GN=Ywhag PE=1 SV=2 - [1433G_RAT]	7.69	1	1	1	1	28.2849	4.89404									2.31808	7.69	1	1	247
P19357	Solute carrier family 2, facilitated glucose transporter member 4 OS=Rattus norvegicus GN=Slc2a4 PE=1 SV=1 - [GTR4_RAT]	1.96	1	1	1	1	54.8604	7.29834									0	1.96	1	1	509
P55260	Annexin A4 OS=Rattus norvegicus GN=Anxa4 PE=1 SV=3 - [ANXA4_RAT]	5.02	2	1	1	1	35.826	5.43994									0	5.02	1	1	319
P41498	Low molecular weight phosphotyrosine protein phosphatase OS=Rattus norvegicus GN=Acp1 PE=1 SV=3 - [PPAC_RAT]	7.59	2	1	1	1	18.1398	6.52197									0	7.59	1	1	158
P07151	Beta-2-microglobulin OS=Rattus norvegicus GN=B2m PE=1 SV=1 - [B2MG_RAT]	7.56	1	1	1	1	13.7111	8.00146									2.07078	7.56	1	1	119
P62747	Rho-related GTP-binding protein RhoB OS=Rattus norvegicus GN=Rhob PE=1 SV=1 - [RHOB_RAT]	12.24	1	1	1	1	22.1091	5.23682									2.64038	12.24	1	1	196
Q3KRD0	Aspartate--tRNA ligase, mitochondrial OS=Rattus norvegicus GN=Dars2 PE=1 SV=1 - [SYDM_RAT]	1.53	1	1	1	1	73.9062	7.18115									1.60824	1.53	1	1	652
Q5XIG5	G kinase-anchoring protein 1 OS=Rattus norvegicus GN=Gkap1 PE=2 SV=1 - [GKAP1_RAT]	2.46	1	1	1	1	41.9065	8.67529									0	2.46	1	1	366
Q5XII9	Mitochondrial fission regulator 1-like OS=Rattus norvegicus GN=Mtfr1l PE=2 SV=1 - [MFR1L_RAT]	5.19	1	1	1	1	31.7102	6.1001									2.79599	5.19	1	1	289
Q5PQQ1	tRNA modification GTPase GTPBP3, mitochondrial OS=Rattus norvegicus GN=Gtpbp3 PE=2 SV=1 - [GTPB3_RAT]	3.05	1	1	1	1	51.9851	6.82959									0	3.05	1	1	492
Q641X9	39S ribosomal protein L9, mitochondrial OS=Rattus norvegicus GN=Mrpl9 PE=2 SV=1 - [RM09_RAT]	4.58	1	1	1	1	30.0572	10.0815									2.18504	4.58	1	1	262
Q6P3E0	Thymocyte nuclear protein 1 OS=Rattus norvegicus GN=Thyn1 PE=2 SV=1 - [THYN1_RAT]	4.42	1	1	1	1	26.106	8.68994									1.83508	4.42	1	1	226
B2RZD7	LYR motif-containing protein 9 OS=Rattus norvegicus GN=Lyrm9 PE=3 SV=1 - [LYRM9_RAT]	16.67	1	1	1	1	9.37285	9.24658									2.40575	16.67	1	1	78
Q00972	[3-methyl-2-oxobutanoate dehydrogenase [lipoamide]] kinase, mitochondrial OS=Rattus norvegicus GN=Bckdk PE=1 SV=2 - [BCKD_RAT]	2.18	1	1	1	1	46.4452	8.76318									1.87333	2.18	1	1	412
Q5BJK8	Golgi integral membrane protein 4 OS=Rattus norvegicus GN=Golim4 PE=1 SV=2 - [GOLI4_RAT]	1.68	2	1	1	1	76.5506	4.85596									1.94672	1.68	1	1	653
A1A5P1	Protein Galntl4 OS=Rattus norvegicus GN=Galnt18 PE=2 SV=1 - [A1A5P1_RAT]	1.48	1	1	1	1	69.5293	6.40479									0	1.48	1	1	607
A2IBE0	Membrane-bound carbonic anhydrase 14 OS=Rattus norvegicus GN=Car14 PE=2 SV=1 - [A2IBE0_RAT]	3.56	1	1	1	1	37.502	6.41748									0	3.56	1	1	337
B5DF65	Biliverdin reductase B (Flavin reductase (NADPH)) OS=Rattus norvegicus GN=Blvrb PE=2 SV=1 - [B5DF65_RAT]	11.65	1	1	1	1	22.0803	6.80029									0	11.65	1	1	206
D3Z822	Protein Atr OS=Rattus norvegicus GN=Atr PE=2 SV=2 - [D3Z822_RAT]	0.57	1	1	1	1	300.966	7.56201									2.90547	0.57	1	1	2642
D3Z8C4	Minichromosome maintenance deficient 10 (S. cerevisiae) (Predicted) OS=Rattus norvegicus GN=Mcm10 PE=4 SV=1 - [D3Z8C4_RAT]	0.9	1	1	1	1	98.9206	8.63135									3.07452	0.9	1	1	889
D3Z979	Mannosidase, alpha, class 1C, member 1 (Predicted) OS=Rattus norvegicus GN=Man1c1 PE=4 SV=2 - [D3Z979_RAT]	2.08	1	1	1	1	70.6237	7.03467									2.8958	2.08	1	1	625
D3Z9Z2	Putative lipoyltransferase 2, mitochondrial OS=Rattus norvegicus GN=Lipt2 PE=3 SV=1 - [D3Z9Z2_RAT]	5.19	1	1	1	1	25.1814	8.76318									1.78827	5.19	1	1	231
D3ZAI6	Protein Nt5dc3 OS=Rattus norvegicus GN=Nt5dc3 PE=3 SV=2 - [D3ZAI6_RAT]	1.83	1	1	1	1	63.086	8.6167									1.81627	1.83	1	1	546
D3ZDP2	Protein Ict1 OS=Rattus norvegicus GN=Ict1 PE=4 SV=1 - [D3ZDP2_RAT]	5.83	1	1	1	1	23.4554	10.1841									2.71724	5.83	1	1	206
D3ZH76	Protein RGD1304931 OS=Rattus norvegicus GN=RGD1304931 PE=4 SV=1 - [D3ZH76_RAT]	2.92	1	1	1	1	83.3148	5.23682									2.03558	2.92	1	1	788
D3ZPR5	Uncharacterized protein OS=Rattus norvegicus PE=4 SV=1 - [D3ZPR5_RAT]	4.74	1	1	1	1	21.1691	10.1401									2.10504	4.74	1	1	190
D3ZV37	Protein Cisd3 OS=Rattus norvegicus GN=Cisd3 PE=4 SV=1 - [D3ZV37_RAT]	6.96	1	1	1	1	18.0574	9.77393									2.43979	6.96	1	1	158
D4A1J3	Protein Palm3 OS=Rattus norvegicus GN=Palm3 PE=4 SV=2 - [D4A1J3_RAT]	1.36	1	1	1	1	78.5384	4.44971									1.83294	1.36	1	1	733
D4A2X2	Unconventional myosin-Ib (Fragment) OS=Rattus norvegicus GN=Myo1b PE=2 SV=2 - [D4A2X2_RAT]	1.48	7	1	1	1	87.5431	9.67139									0	1.48	1	1	745
D4A4J3	Protein Man2a2 OS=Rattus norvegicus GN=Man2a2 PE=4 SV=2 - [D4A4J3_RAT]	1.03	1	1	1	1	131.294	6.91748									0	1.03	1	1	1161
D4AB66	Protein Ston2 OS=Rattus norvegicus GN=Ston2 PE=4 SV=1 - [D4AB66_RAT]	2.23	1	1	1	1	99.4288	5.23682									0	2.23	1	1	895
D4AE79	Protein Chmp1a OS=Rattus norvegicus GN=Chmp1a PE=4 SV=1 - [D4AE79_RAT]	4.08	1	1	1	1	21.5942	8.06006									1.82524	4.08	1	1	196
E9PTM2	Protein Zfc3h1 OS=Rattus norvegicus GN=Zfc3h1 PE=2 SV=2 - [E9PTM2_RAT]	1.04	1	1	1	1	206.014	7.50342									2.10716	1.04	1	1	1822
F1LM84	Nidogen-1 OS=Rattus norvegicus GN=Nid1 PE=2 SV=1 - [F1LM84_RAT]	0.88	1	1	1	1	136.952	5.46533									2.273	0.88	1	1	1246
F1LRI5	Protein Gcn1l1 OS=Rattus norvegicus GN=Gcn1l1 PE=2 SV=2 - [F1LRI5_RAT]	0.3	1	1	1	1	292.475	7.29834									1.98963	0.3	1	1	2669
F1M5V2	Protein Glipr2 OS=Rattus norvegicus GN=Glipr2 PE=4 SV=2 - [F1M5V2_RAT]	8.44	1	1	1	1	17.0655	9.49561									2.23668	8.44	1	1	154
F1M8S9	Protein Lekr1 OS=Rattus norvegicus GN=Lekr1 PE=4 SV=2 - [F1M8S9_RAT]	1.3	1	1	1	1	80.8172	8.1333									0	1.3	1	1	691
G3V6Q2	RCG48721, isoform CRA_b OS=Rattus norvegicus GN=Trhde PE=4 SV=1 - [G3V6Q2_RAT]	2.25	1	1	1	1	121.9	7.29834									0	2.25	1	1	1066
G3V6R7	3-oxoacyl-[acyl-carrier-protein] synthase, mitochondrial OS=Rattus norvegicus GN=Oxsm PE=3 SV=1 - [G3V6R7_RAT]	2.19	1	1	1	1	47.9742	7.34229									2.08585	2.19	1	1	456
M0R6K0	Laminin subunit beta-2 OS=Rattus norvegicus GN=Lamb2 PE=4 SV=1 - [M0R6K0_RAT]	0.67	2	1	1	1	196.406	6.80029									1.71964	0.67	1	1	1801
P24623-2	Isoform 2 of Alpha-crystallin A chain OS=Rattus norvegicus GN=Cryaa - [CRYAA_RAT]	4.62	2	1	1	1	19.7799	6.20166									1.80149	4.62	1	1	173
Q5U2X8	Acyl-CoA thioesterase 9 OS=Rattus norvegicus GN=Acot9 PE=2 SV=1 - [Q5U2X8_RAT]	2.51	1	1	1	1	50.4109	8.63135									0	2.51	1	1	439
Q5XIG1	Ldb3 protein OS=Rattus norvegicus GN=Ldb3 PE=2 SV=1 - [Q5XIG1_RAT]	5.65	1	1	1	1	30.9688	9.18799									2.32987	5.65	1	1	283

## Sheet: Table S2
Table S2.
This file contains a list of all proteins identified with the IEF-based platform.
Raw data files and database search files are available from the authors upon request.
Accession	Description	ΣCoverage	Σ# Proteins	Σ# Unique Peptides	Σ# Peptides	Σ# PSMs	MW [kDa]	calc. pI	Score A2	Coverage A2	# Peptides A2	# PSM A2	Score B2	Coverage B2	# Peptides B2	# PSM B2	Score C2	Coverage C2	# Peptides C2	# PSM C2	# AAs
G3V6D3	ATP synthase subunit beta OS=Rattus norvegicus GN=Atp5b PE=3 SV=1 - [G3V6D3_RAT]	77.88	2	27	27	12236	56.3095	5.2749	11928.1	77.88	27	3720	14525.3	71.08	26	4844	11344	71.08	26	3672	529
P15999	ATP synthase subunit alpha, mitochondrial OS=Rattus norvegicus GN=Atp5a1 PE=1 SV=2 - [ATPA_RAT]	52.62	2	11	27	11905	59.7166	9.18799	13114.2	47.74	21	3929	11485	52.44	26	4144	11437.8	51.36	26	3832	553
M0R4D7	Uncharacterized protein OS=Rattus norvegicus PE=3 SV=1 - [M0R4D7_RAT]	41.61	1	1	17	8061	51.6642	8.88037	9800.61	34.99	13	2848	7125.71	41.61	17	2642	7665.57	41.61	17	2571	483
P04636	Malate dehydrogenase, mitochondrial OS=Rattus norvegicus GN=Mdh2 PE=1 SV=2 - [MDHM_RAT]	50.59	1	13	13	2929	35.6608	8.67529	2159.89	50.59	13	651	3772.19	42.31	11	1248	3235.8	42.31	11	1030	338
P15650	Long-chain specific acyl-CoA dehydrogenase, mitochondrial OS=Rattus norvegicus GN=Acadl PE=1 SV=1 - [ACADL_RAT]	38.14	1	15	15	2707	47.8424	7.73779	2035.93	38.14	15	697	3064.87	38.14	15	1194	2392.55	38.14	15	816	430
P56574	Isocitrate dehydrogenase [NADP], mitochondrial OS=Rattus norvegicus GN=Idh2 PE=1 SV=2 - [IDHP_RAT]	48.23	2	22	22	2534	50.9349	8.68994	2176	41.81	17	630	3087.44	44.03	20	1075	2632.92	40.27	17	829	452
Q05962	ADP/ATP translocase 1 OS=Rattus norvegicus GN=Slc25a4 PE=1 SV=3 - [ADT1_RAT]	31.21	4	5	11	2189	32.9682	9.78857	3256.88	23.15	6	957	1744.01	31.21	11	627	1763.26	23.15	7	605	298
Q9ER34	Aconitate hydratase, mitochondrial OS=Rattus norvegicus GN=Aco2 PE=1 SV=2 - [ACON_RAT]	45.38	1	30	30	2073	85.38	7.82568	2333.57	41.41	25	691	2145.27	42.05	28	708	2113.52	42.05	26	674	780
Q64428	Trifunctional enzyme subunit alpha, mitochondrial OS=Rattus norvegicus GN=Hadha PE=1 SV=2 - [ECHA_RAT]	45.35	1	26	26	2055	82.6125	9.05615	2249.97	44.3	25	673	2492.31	43.12	23	838	1708.31	40.89	21	544	763
G3V9U2	3-ketoacyl-CoA thiolase, mitochondrial OS=Rattus norvegicus GN=Acaa2 PE=4 SV=2 - [G3V9U2_RAT]	59.6	1	1	16	1860	41.7575	8.14795	2159.11	52.02	12	682	1822.72	59.6	16	654	1592.07	56.06	14	524	396
P13437	3-ketoacyl-CoA thiolase, mitochondrial OS=Rattus norvegicus GN=Acaa2 PE=2 SV=1 - [THIM_RAT]	56.93	1	1	16	1859	41.8445	7.94287	2136.66	49.37	12	675	1827.99	56.93	16	659	1590.22	53.4	14	525	397
P32551	Cytochrome b-c1 complex subunit 2, mitochondrial OS=Rattus norvegicus GN=Uqcrc2 PE=1 SV=2 - [QCR2_RAT]	44.47	1	18	18	1719	48.3662	9.14404	1645.13	40.93	14	476	2077.88	41.37	15	686	1790.68	40.93	15	557	452
Q66HF1	NADH-ubiquinone oxidoreductase 75 kDa subunit, mitochondrial OS=Rattus norvegicus GN=Ndufs1 PE=1 SV=1 - [NDUS1_RAT]	52.96	1	29	29	1683	79.3616	5.89697	2011.16	47.46	24	628	1443.33	47.46	26	509	1573.43	41.95	24	546	727
P00507	Aspartate aminotransferase, mitochondrial OS=Rattus norvegicus GN=Got2 PE=1 SV=2 - [AATM_RAT]	46.51	3	17	17	1678	47.2841	8.99756	1751.14	39.3	15	560	1743.99	40	15	667	1295.05	31.16	11	451	430
P35435	ATP synthase subunit gamma, mitochondrial OS=Rattus norvegicus GN=Atp5c1 PE=1 SV=2 - [ATPG_RAT]	44.69	3	11	11	1655	30.1717	8.83643	945.24	35.16	7	398	1548.48	42.12	10	715	1266.51	44.32	10	542	273
P63039	60 kDa heat shock protein, mitochondrial OS=Rattus norvegicus GN=Hspd1 PE=1 SV=1 - [CH60_RAT]	66.84	4	29	29	1602	60.9174	6.17627	1744.5	60.03	25	565	1498.65	58.46	25	583	1339.26	62.48	25	454	573
Q5BJZ3	Nicotinamide nucleotide transhydrogenase OS=Rattus norvegicus GN=Nnt PE=2 SV=1 - [Q5BJZ3_RAT]	33.89	1	28	28	1480	113.796	7.88428	1664.92	28.55	22	521	1369.04	30.48	26	524	1247.43	32.97	26	435	1086
M0R6J6	Creatine kinase S-type, mitochondrial OS=Rattus norvegicus GN=Ckmt2 PE=3 SV=1 - [M0R6J6_RAT]	22.33	3	3	9	1371	46.4213	9.49561	1840.48	22.33	9	526	1353.06	22.33	9	470	1227.84	18.45	8	375	412
Q5XI78	2-oxoglutarate dehydrogenase, mitochondrial OS=Rattus norvegicus GN=Ogdh PE=1 SV=1 - [ODO1_RAT]	43.4	2	34	34	1285	116.221	6.771	1196.13	38.71	27	403	1323.02	39	32	503	1105.83	38.61	28	379	1023
Q920L2	Succinate dehydrogenase [ubiquinone] flavoprotein subunit, mitochondrial OS=Rattus norvegicus GN=Sdha PE=1 SV=1 - [DHSA_RAT]	40.09	1	17	17	1201	71.5697	7.1665	1715.76	37.35	15	522	1110.78	31.25	14	375	975.061	28.05	13	304	656
Q68FY0	Cytochrome b-c1 complex subunit 1, mitochondrial OS=Rattus norvegicus GN=Uqcrc1 PE=1 SV=1 - [QCR1_RAT]	47.71	1	15	15	1174	52.8154	5.88428	1275.02	34.38	11	342	1225.2	47.71	15	462	911.109	35.42	11	370	480
Q5M9H2	Acyl-Coenzyme A dehydrogenase, very long chain OS=Rattus norvegicus GN=Acadvl PE=2 SV=1 - [Q5M9H2_RAT]	53.59	2	27	27	1154	70.7767	8.80713	1372	50.84	24	433	1168.82	46.87	23	390	1035.37	45.65	22	331	655
P31399	ATP synthase subunit d, mitochondrial OS=Rattus norvegicus GN=Atp5h PE=1 SV=3 - [ATP5H_RAT]	77.02	4	14	14	1083	18.7516	6.59521	888.734	71.43	12	271	1044.34	77.02	12	359	1461.71	77.02	12	453	161
P09605	Creatine kinase S-type, mitochondrial OS=Rattus norvegicus GN=Ckmt2 PE=1 SV=2 - [KCRS_RAT]	39.38	3	5	11	1065	47.3553	8.51416	1400.41	39.38	11	396	1045.91	27.92	9	384	881.494	24.11	8	285	419
B2GV06	Succinyl-CoA:3-ketoacid coenzyme A transferase 1, mitochondrial OS=Rattus norvegicus GN=Oxct1 PE=1 SV=1 - [SCOT1_RAT]	50	1	16	16	1027	56.1681	8.47021	1575.16	46.35	14	466	935.835	44.62	14	270	1040.4	48.27	15	291	520
P49432	Pyruvate dehydrogenase E1 component subunit beta, mitochondrial OS=Rattus norvegicus GN=Pdhb PE=1 SV=2 - [ODPB_RAT]	49.86	1	13	13	975	38.957	6.65381	1299.6	49.86	13	364	1070.27	43.45	12	329	915.827	43.45	12	282	359
P13803	Electron transfer flavoprotein subunit alpha, mitochondrial OS=Rattus norvegicus GN=Etfa PE=1 SV=4 - [ETFA_RAT]	56.76	1	13	13	937	34.9295	8.38232	1727.86	50.75	11	478	731.023	42.94	10	216	840.054	44.74	10	243	333
Q9Z2L0	Voltage-dependent anion-selective channel protein 1 OS=Rattus norvegicus GN=Vdac1 PE=1 SV=4 - [VDAC1_RAT]	60.78	4	5	12	906	30.7366	8.54346	1228.75	57.6	10	367	892.014	54.06	11	275	894.646	50.88	9	264	283
G3V7Y3	ATP synthase subunit delta, mitochondrial OS=Rattus norvegicus GN=Atp5d PE=3 SV=1 - [G3V7Y3_RAT]	20.24	2	5	5	905	17.5522	5.23682	476.465	13.69	2	151	273.562	13.69	2	87	2123.3	20.24	5	667	168
Q6P6R2	Dihydrolipoyl dehydrogenase, mitochondrial OS=Rattus norvegicus GN=Dld PE=1 SV=1 - [DLDH_RAT]	42.83	2	14	14	843	54.0041	7.86963	939.961	38.7	12	286	956.029	36.35	13	326	766.72	34.77	12	231	509
Q60587	Trifunctional enzyme subunit beta, mitochondrial OS=Rattus norvegicus GN=Hadhb PE=1 SV=1 - [ECHB_RAT]	58.32	1	22	22	808	51.3815	9.46631	682.071	45.68	15	239	802.539	51.16	21	348	567.378	45.68	18	221	475
P19511	ATP synthase subunit b, mitochondrial OS=Rattus norvegicus GN=Atp5f1 PE=1 SV=1 - [AT5F1_RAT]	46.09	1	10	10	796	28.8505	9.36377	679.392	42.97	9	224	887.198	46.09	10	329	712.041	46.09	10	243	256
P17764	Acetyl-CoA acetyltransferase, mitochondrial OS=Rattus norvegicus GN=Acat1 PE=1 SV=1 - [THIL_RAT]	43.16	1	12	12	790	44.6664	8.76318	802.097	41.27	11	229	879.465	38.68	11	282	915.146	38.68	11	279	424
Q3KR86	Mitochondrial inner membrane protein (Fragment) OS=Rattus norvegicus GN=Immt PE=1 SV=1 - [IMMT_RAT]	50.41	1	26	26	735	67.1352	5.79541	644.159	45.16	21	214	728.974	50.41	25	260	755.277	43.84	22	261	609
P68035	Actin, alpha cardiac muscle 1 OS=Rattus norvegicus GN=Actc1 PE=2 SV=1 - [ACTC_RAT]	47.48	5	2	13	690	41.9919	5.38916	520.025	47.48	13	199	616.878	39.52	12	258	590.146	39.52	12	233	377
P68136	Actin, alpha skeletal muscle OS=Rattus norvegicus GN=Acta1 PE=1 SV=1 - [ACTS_RAT]	47.21	3	1	12	657	42.0239	5.38916	462.291	41.64	11	184	593.663	39.26	11	251	552.168	33.69	10	222	377
P26284	Pyruvate dehydrogenase E1 component subunit alpha, somatic form, mitochondrial OS=Rattus norvegicus GN=Pdha1 PE=1 SV=2 - [ODPA_RAT]	41.54	3	12	12	638	43.1986	8.19189	479.496	26.67	10	188	627.913	32.82	10	264	471.577	38.97	11	186	390
F1M953	Stress-70 protein, mitochondrial OS=Rattus norvegicus GN=Hspa9 PE=2 SV=1 - [F1M953_RAT]	45.66	3	26	26	635	73.6988	6.16357	599.955	41.83	22	200	582.938	42.56	24	215	614.077	39.18	22	220	679
P15651	Short-chain specific acyl-CoA dehydrogenase, mitochondrial OS=Rattus norvegicus GN=Acads PE=1 SV=2 - [ACADS_RAT]	44.9	2	13	13	612	44.737	8.27979	667.308	44.9	13	227	499.621	37.62	11	204	474.235	37.62	11	181	412
F1LX07	Protein Slc25a12 (Fragment) OS=Rattus norvegicus GN=Slc25a12 PE=3 SV=2 - [F1LX07_RAT]	45.93	1	16	20	607	74.1807	8.74854	640.773	44.59	19	209	530.109	45.93	20	209	513.446	39.85	18	189	675
P20788	Cytochrome b-c1 complex subunit Rieske, mitochondrial OS=Rattus norvegicus GN=Uqcrfs1 PE=1 SV=2 - [UCRI_RAT]	50	1	11	11	602	29.4272	8.86572	689.862	42.34	9	221	401.88	42.7	9	175	587.102	42.7	9	206	274
P60711	Actin, cytoplasmic 1 OS=Rattus norvegicus GN=Actb PE=1 SV=1 - [ACTB_RAT]	43.47	5	6	12	596	41.7097	5.47803	388.856	43.2	11	160	526.091	35.47	11	226	520.098	35.47	11	210	375
P14408-2	Isoform Cytoplasmic of Fumarate hydratase, mitochondrial OS=Rattus norvegicus GN=Fh - [FUMH_RAT]	52.03	2	2	15	594	50.1377	8.19189	684.777	50.32	14	211	603.333	51.82	14	209	550.908	51.82	14	174	467
F1LN88	Aldehyde dehydrogenase, mitochondrial OS=Rattus norvegicus GN=Aldh2 PE=3 SV=2 - [F1LN88_RAT]	38.15	7	17	17	579	56.4807	7.32764	722.194	34.49	14	233	540.78	36.03	15	190	479.15	36.42	15	156	519
Q68FU3	Electron transfer flavoprotein subunit beta OS=Rattus norvegicus GN=Etfb PE=2 SV=3 - [ETFB_RAT]	40	1	10	10	577	27.6701	7.75244	390.214	36.08	9	148	593.518	40	10	285	363.317	36.08	9	144	255
G3V7I0	Peroxiredoxin 3 OS=Rattus norvegicus GN=Prdx3 PE=4 SV=1 - [G3V7I0_RAT]	28.02	2	7	7	555	28.2815	7.54736	782.263	25.29	6	278	356.785	27.63	6	149	344.458	27.63	6	128	257
P18163	Long-chain-fatty-acid--CoA ligase 1 OS=Rattus norvegicus GN=Acsl1 PE=1 SV=1 - [ACSL1_RAT]	37.34	5	24	24	554	78.1282	6.99072	439.632	27.32	16	164	563.359	34.33	22	228	440.218	33.76	21	162	699
D3ZG43	NADH dehydrogenase (Ubiquinone) Fe-S protein 3 (Predicted), isoform CRA_c OS=Rattus norvegicus GN=Ndufs3 PE=3 SV=1 - [D3ZG43_RAT]	35.98	1	11	11	554	30.2076	7.53271	376.72	34.47	9	120	707.668	35.98	11	227	676.172	34.85	10	207	264
P11240	Cytochrome c oxidase subunit 5A, mitochondrial OS=Rattus norvegicus GN=Cox5a PE=1 SV=1 - [COX5A_RAT]	49.32	1	8	8	548	16.1193	6.53662	449.489	49.32	7	138	686.736	49.32	7	235	495.854	49.32	8	175	146
P00762	Anionic trypsin-1 OS=Rattus norvegicus GN=Prss1 PE=1 SV=1 - [TRY1_RAT]	8.13	1	1	1	546	25.9427	4.89404	466.733	8.13	1	117	788.913	8.13	1	212	817.481	8.13	1	217	246
Q5M964	Fumarate hydratase 1 OS=Rattus norvegicus GN=Fh PE=2 SV=1 - [Q5M964_RAT]	47.93	1	1	14	544	54.43	8.73389	582.133	46.35	13	178	565.968	43.79	13	197	531.632	43.79	13	169	507
G3V936	Citrate synthase OS=Rattus norvegicus GN=Cs PE=3 SV=1 - [G3V936_RAT]	41.85	2	15	15	537	51.7975	8.41162	466.618	32.19	10	158	585.344	33.05	13	254	373.135	36.05	12	125	466
P08461	Dihydrolipoyllysine-residue acetyltransferase component of pyruvate dehydrogenase complex, mitochondrial OS=Rattus norvegicus GN=Dlat PE=1 SV=3 - [ODP2_RAT]	29.59	2	13	13	525	67.1234	8.52881	599.347	21.84	9	168	535.457	27.37	12	187	551.775	19.62	8	170	632
Q561S0	NADH dehydrogenase [ubiquinone] 1 alpha subcomplex subunit 10, mitochondrial OS=Rattus norvegicus GN=Ndufa10 PE=1 SV=1 - [NDUAA_RAT]	44.79	1	12	12	520	40.4676	7.79639	492.004	44.79	12	142	569.318	39.44	11	193	592.562	44.79	12	185	355
Q641Y2	NADH dehydrogenase [ubiquinone] iron-sulfur protein 2, mitochondrial OS=Rattus norvegicus GN=Ndufs2 PE=1 SV=1 - [NDUS2_RAT]	58.53	1	18	18	520	52.5276	6.99072	620.361	43.84	13	187	513.699	40.39	12	177	473.268	46.44	15	156	463
Q62651	Delta(3,5)-Delta(2,4)-dienoyl-CoA isomerase, mitochondrial OS=Rattus norvegicus GN=Ech1 PE=1 SV=2 - [ECH1_RAT]	37.61	1	10	10	501	36.1484	7.98682	405.452	28.13	7	142	512.384	37.61	10	183	505.264	25.08	7	176	327
P23965	Enoyl-CoA delta isomerase 1, mitochondrial OS=Rattus norvegicus GN=Eci1 PE=1 SV=1 - [ECI1_RAT]	46.37	2	10	10	471	32.234	9.53955	349.637	43.6	9	119	506.271	42.91	9	195	431.218	43.6	9	157	289
G3V7J0	Aldehyde dehydrogenase family 6, subfamily A1, isoform CRA_b OS=Rattus norvegicus GN=Aldh6a1 PE=3 SV=1 - [G3V7J0_RAT]	45.05	2	16	16	462	57.7105	8.17725	483.382	30.65	11	136	516.605	45.05	16	176	499.958	37.94	13	150	535
Q66HF3	Electron transfer flavoprotein-ubiquinone oxidoreductase, mitochondrial OS=Rattus norvegicus GN=Etfdh PE=2 SV=1 - [Q66HF3_RAT]	27.27	2	14	14	451	68.1207	7.56201	384.871	23.54	11	136	470.146	27.27	14	203	298.656	21.43	10	112	616
B0BMW2	3-hydroxyacyl-CoA dehydrogenase type-2 OS=Rattus norvegicus GN=Hsd17b10 PE=2 SV=1 - [B0BMW2_RAT]	73.18	2	13	13	449	27.2325	8.5874	534.066	63.6	12	155	501.889	73.18	13	163	418.046	72.41	11	131	261
F1LM47	Protein Sucla2 OS=Rattus norvegicus GN=Sucla2 PE=2 SV=1 - [F1LM47_RAT]	45.81	1	18	18	437	50.2742	7.69385	610.514	42.37	16	175	354.666	43.44	16	123	431.474	37.2	14	139	465
Q5BK63	NADH dehydrogenase [ubiquinone] 1 alpha subcomplex subunit 9, mitochondrial OS=Rattus norvegicus GN=Ndufa9 PE=1 SV=2 - [NDUA9_RAT]	55.44	1	17	17	426	42.5323	9.81787	449.089	46.42	13	139	465.254	53.32	16	168	360.757	46.95	14	119	377
Q09073	ADP/ATP translocase 2 OS=Rattus norvegicus GN=Slc25a5 PE=1 SV=3 - [ADT2_RAT]	31.21	4	1	10	414	32.8801	9.72998	156.002	20.47	5	54	450.739	31.21	10	188	480.262	23.15	7	172	298
P56571	ES1 protein homolog, mitochondrial OS=Rattus norvegicus PE=1 SV=2 - [ES1_RAT]	37.97	1	8	8	408	28.1549	8.92432	318.301	30.45	5	106	410.081	37.97	7	173	384.579	31.2	6	129	266
P14604	Enoyl-CoA hydratase, mitochondrial OS=Rattus norvegicus GN=Echs1 PE=1 SV=1 - [ECHM_RAT]	55.17	1	12	12	398	31.4962	8.1333	450.298	50.34	10	138	371.34	42.76	11	140	350.123	39.31	9	120	290
F1M2D3	Uncharacterized protein OS=Rattus norvegicus GN=Vdac1 PE=4 SV=2 - [F1M2D3_RAT]	38.3	2	2	9	398	30.7135	8.26514	450.809	32.27	6	135	399.926	38.3	9	146	343.983	32.27	6	117	282
F1LZW6	Protein Slc25a13 (Fragment) OS=Rattus norvegicus GN=Slc25a13 PE=3 SV=1 - [F1LZW6_RAT]	40.74	1	16	20	394	74.3358	8.70459	401.896	34.67	16	128	360.019	36.44	18	145	315.926	35.41	17	121	675
P85834	Elongation factor Tu, mitochondrial OS=Rattus norvegicus GN=Tufm PE=1 SV=1 - [EFTU_RAT]	46.9	1	16	16	393	49.491	7.56201	305.152	28.54	10	100	331.677	46.9	16	124	474.17	35.4	12	169	452
G3V6P2	Dihydrolipoamide S-succinyltransferase (E2 component of 2-oxo-glutarate complex), isoform CRA_a OS=Rattus norvegicus GN=Dlst PE=3 SV=1 - [G3V6P2_RAT]	26.21	2	9	9	383	48.8684	8.70459	547.445	18.06	6	153	309.801	20.93	7	102	422.637	19.82	6	128	454
F1LNF7	Isocitrate dehydrogenase [NAD] subunit alpha, mitochondrial OS=Rattus norvegicus GN=Idh3a PE=2 SV=1 - [F1LNF7_RAT]	35.79	2	11	11	373	39.557	6.91748	334.424	26.78	8	134	336.259	33.06	10	135	272.352	24.04	7	104	366
D3ZE29	Uncharacterized protein (Fragment) OS=Rattus norvegicus PE=3 SV=2 - [D3ZE29_RAT]	24.52	3	1	8	363	34.4768	9.34912	174.371	14.33	4	60	375.795	24.52	8	164	375.856	16.88	5	139	314
Q06647	ATP synthase subunit O, mitochondrial OS=Rattus norvegicus GN=Atp5o PE=1 SV=1 - [ATPO_RAT]	61.5	1	10	10	358	23.3828	10.0229	302.6	58.22	9	103	348.742	51.17	9	154	272.318	47.89	8	101	213
P81155	Voltage-dependent anion-selective channel protein 2 OS=Rattus norvegicus GN=Vdac2 PE=1 SV=2 - [VDAC2_RAT]	31.86	2	6	7	354	31.7256	7.48877	303.092	26.44	5	108	355.149	31.86	7	152	266.527	31.86	7	94	295
Q9WVK7	Hydroxyacyl-coenzyme A dehydrogenase, mitochondrial OS=Rattus norvegicus GN=Hadh PE=2 SV=1 - [HCDH_RAT]	51.27	1	10	10	331	34.4259	8.76318	350.078	44.27	7	97	433.719	43.63	8	154	297.159	36.62	5	80	314
Q5XIH3	NADH dehydrogenase (Ubiquinone) flavoprotein 1 OS=Rattus norvegicus GN=Ndufv1 PE=2 SV=1 - [Q5XIH3_RAT]	41.16	1	16	16	328	50.6986	8.07471	287.912	30.82	10	97	277.16	29.96	12	155	187.996	23.71	8	76	464
G3V796	Acetyl-Coenzyme A dehydrogenase, medium chain OS=Rattus norvegicus GN=Acadm PE=3 SV=1 - [G3V796_RAT]	45.37	2	14	14	319	46.5418	8.41162	213.275	34.68	10	75	356.02	43.23	13	143	281.387	38.24	11	101	421
Q68FZ8	Propionyl coenzyme A carboxylase, beta polypeptide OS=Rattus norvegicus GN=Pccb PE=2 SV=1 - [Q68FZ8_RAT]	45.1	1	3	17	317	58.6411	7.84033	325.094	39	15	103	286.844	45.1	17	103	342.273	38.63	14	111	541
Q9R1Z0	Voltage-dependent anion-selective channel protein 3 OS=Rattus norvegicus GN=Vdac3 PE=1 SV=2 - [VDAC3_RAT]	34.98	2	5	6	311	30.7784	8.70459	363.873	34.98	6	114	330.861	34.98	6	111	264.219	34.98	6	86	283
O55171	Acyl-coenzyme A thioesterase 2, mitochondrial OS=Rattus norvegicus GN=Acot2 PE=1 SV=1 - [ACOT2_RAT]	29.8	9	11	11	304	49.6697	7.82568	351.217	28.04	10	117	258.907	27.37	10	96	259.799	24.94	9	91	453
P10888	Cytochrome c oxidase subunit 4 isoform 1, mitochondrial OS=Rattus norvegicus GN=Cox4i1 PE=1 SV=1 - [COX41_RAT]	31.36	1	5	5	296	19.5021	9.43701	256.226	26.63	4	84	325.831	31.36	5	108	338.298	31.36	5	104	169
F1M8L5	Propionyl-CoA carboxylase alpha chain, mitochondrial OS=Rattus norvegicus GN=Pcca PE=2 SV=2 - [F1M8L5_RAT]	35.62	2	2	21	287	69.1864	7.21045	301.743	32.91	18	104	231.956	33.87	18	93	267.04	31.31	17	90	626
F1LPV8	Protein Suclg2 OS=Rattus norvegicus GN=Suclg2 PE=2 SV=2 - [F1LPV8_RAT]	32.71	1	10	10	285	46.6095	7.7085	278.043	32.71	10	88	228.172	32.71	10	79	389.925	30.86	9	118	431
P29266	3-hydroxyisobutyrate dehydrogenase, mitochondrial OS=Rattus norvegicus GN=Hibadh PE=1 SV=3 - [3HIDH_RAT]	40.9	1	11	11	280	35.2796	8.47021	311.793	28.36	7	83	285.877	34.03	10	89	379.403	35.22	8	108	335
Q63704	Carnitine O-palmitoyltransferase 1, muscle isoform OS=Rattus norvegicus GN=Cpt1b PE=1 SV=1 - [CPT1B_RAT]	18.39	1	12	13	279	88.1592	8.60205	214.714	16.45	11	92	184.822	15.8	11	98	192.183	13.86	9	89	772
P12007	Isovaleryl-CoA dehydrogenase, mitochondrial OS=Rattus norvegicus GN=Ivd PE=1 SV=2 - [IVD_RAT]	40.09	1	12	12	269	46.4058	7.89893	246.462	34.2	9	77	275.892	40.09	12	106	252.834	28.07	9	86	424
P07633	Propionyl-CoA carboxylase beta chain, mitochondrial OS=Rattus norvegicus GN=Pccb PE=2 SV=1 - [PCCB_RAT]	43.07	1	2	16	266	58.589	7.47412	267.611	36.97	14	85	237.722	43.07	16	86	292.955	36.6	13	95	541
D4A0T0	Protein Ndufb10 OS=Rattus norvegicus GN=Ndufb10 PE=4 SV=1 - [D4A0T0_RAT]	43.18	2	7	7	261	20.8454	7.69385	287.139	31.82	4	82	298.684	43.18	7	100	248.419	37.5	5	79	176
Q63362	NADH dehydrogenase [ubiquinone] 1 alpha subcomplex subunit 5 OS=Rattus norvegicus GN=Ndufa5 PE=1 SV=3 - [NDUA5_RAT]	43.1	1	5	5	256	13.4033	7.43018	231.046	42.24	4	55	412.536	43.1	5	143	216.788	43.1	5	58	116
Q499N5	Acyl-CoA synthetase family member 2, mitochondrial OS=Rattus norvegicus GN=Acsf2 PE=2 SV=1 - [ACSF2_RAT]	34.47	1	14	14	256	67.8429	8.11865	231.705	24.88	10	86	254.551	28.29	12	95	199.484	29.27	11	75	615
G3V7N5	Carnitine O-palmitoyltransferase 2, mitochondrial OS=Rattus norvegicus GN=Cpt2 PE=3 SV=1 - [G3V7N5_RAT]	40.43	2	17	17	245	74.0314	7.45947	261.728	28.27	13	83	243.465	26.9	12	94	183.377	34.95	14	68	658
G3V8B0	Myosin-7 OS=Rattus norvegicus GN=Myh7 PE=4 SV=1 - [G3V8B0_RAT]	37.11	13	13	58	240	222.762	5.75732	288.918	28.68	41	88	203.899	25.17	38	74	227.934	21.65	30	78	1935
G3V6H5	Mitochondrial 2-oxoglutarate/malate carrier protein OS=Rattus norvegicus GN=Slc25a11 PE=3 SV=1 - [G3V6H5_RAT]	38.54	2	9	9	235	34.1149	9.96436	169.033	27.71	6	54	281.105	38.54	9	97	284.885	38.54	9	84	314
G3V734	2,4-dienoyl CoA reductase 1, mitochondrial, isoform CRA_a OS=Rattus norvegicus GN=Decr1 PE=4 SV=1 - [G3V734_RAT]	39.7	2	11	11	235	36.1097	8.93896	262.685	34.93	9	83	233.37	37.31	10	93	176.085	31.94	9	59	335
P14882	Propionyl-CoA carboxylase alpha chain, mitochondrial OS=Rattus norvegicus GN=Pcca PE=1 SV=3 - [PCCA_RAT]	30.66	1	2	21	231	81.5711	7.69385	255.806	25.24	16	86	182.449	27.14	17	75	210.252	25.92	16	70	737
P67779	Prohibitin OS=Rattus norvegicus GN=Phb PE=1 SV=1 - [PHB_RAT]	62.5	5	13	13	230	29.8019	5.75732	238.268	55.15	10	78	205.419	53.68	12	78	214.589	46.32	10	74	272
Q68FX0	Isocitrate dehydrogenase [NAD] subunit beta, mitochondrial OS=Rattus norvegicus GN=Idh3B PE=1 SV=1 - [IDH3B_RAT]	36.1	1	11	11	228	42.3268	8.74854	256.475	33.77	10	91	188.398	31.69	10	75	155.616	21.04	7	62	385
Q4V8F9	Hydroxysteroid dehydrogenase-like protein 2 OS=Rattus norvegicus GN=Hsdl2 PE=2 SV=1 - [HSDL2_RAT]	26.34	1	10	10	225	58.3069	6.18896	313.489	18.7	8	90	216.48	20.61	9	72	199.912	24.43	9	63	524
Q6PDU7	ATP synthase subunit g, mitochondrial OS=Rattus norvegicus GN=Atp5l PE=1 SV=2 - [ATP5L_RAT]	46.6	1	4	4	223	11.4261	9.5835	213.949	46.6	4	67	214.066	46.6	4	85	175.859	41.75	3	71	103
Q5XIH7	Prohibitin-2 OS=Rattus norvegicus GN=Phb2 PE=1 SV=1 - [PHB2_RAT]	46.15	1	11	11	218	33.2919	9.83252	329.705	43.48	10	98	214.246	42.47	10	75	151.486	36.79	8	45	299
G3V885	Myosin-6 OS=Rattus norvegicus GN=Myh6 PE=4 SV=1 - [G3V885_RAT]	33.94	11	8	53	217	223.371	5.73193	249.751	25.43	37	78	179.179	21.2	33	66	203.567	20.42	29	73	1939
P19234	NADH dehydrogenase [ubiquinone] flavoprotein 2, mitochondrial OS=Rattus norvegicus GN=Ndufv2 PE=1 SV=2 - [NDUV2_RAT]	43.55	1	9	9	216	27.3609	6.68311	257.061	31.85	6	83	200.047	33.47	7	72	170.238	33.47	7	61	248
D3ZUX5	Coiled-coil-helix-coiled-coil-helix domain containing 3 (Predicted), isoform CRA_a OS=Rattus norvegicus GN=Chchd3 PE=4 SV=1 - [D3ZUX5_RAT]	29.07	1	6	6	212	26.4182	8.1333	137.213	22.03	4	52	246.721	29.07	6	112	117.45	25.55	5	48	227
Q9JM53	Apoptosis-inducing factor 1, mitochondrial OS=Rattus norvegicus GN=Aifm1 PE=1 SV=1 - [AIFM1_RAT]	42.81	1	17	18	210	66.6808	8.96826	195.917	33.5	14	72	212.303	37.58	15	82	157.195	33.66	14	56	612
P21913	Succinate dehydrogenase [ubiquinone] iron-sulfur subunit, mitochondrial OS=Rattus norvegicus GN=Sdhb PE=2 SV=2 - [DHSB_RAT]	23.05	1	7	7	205	31.8089	8.67529	194.965	16.67	5	70	200.097	23.05	7	78	151.78	16.67	5	57	282
P07895	Superoxide dismutase [Mn], mitochondrial OS=Rattus norvegicus GN=Sod2 PE=1 SV=2 - [SODM_RAT]	43.69	1	7	7	201	24.6586	8.80713	256.175	36.94	5	76	190.773	34.68	6	59	229.897	27.93	4	66	222
Q68FT1	Ubiquinone biosynthesis protein COQ9, mitochondrial OS=Rattus norvegicus GN=Coq9 PE=2 SV=2 - [COQ9_RAT]	28.53	1	7	7	200	35.1235	5.77002	183.124	25.96	6	68	185.118	28.53	7	77	136.285	25.96	6	55	312
D3ZZN3	Protein Acss1 OS=Rattus norvegicus GN=Acss1 PE=4 SV=1 - [D3ZZN3_RAT]	30.5	1	16	16	197	74.8439	6.85889	162.086	21.85	11	63	177.86	27.71	15	74	150.547	20.23	10	60	682
P29419	ATP synthase subunit e, mitochondrial OS=Rattus norvegicus GN=Atp5i PE=1 SV=3 - [ATP5I_RAT]	35.21	1	2	2	186	8.24948	9.34912	232.775	35.21	2	81	157.439	35.21	2	55	140.996	35.21	2	50	71
P10860	Glutamate dehydrogenase 1, mitochondrial OS=Rattus norvegicus GN=Glud1 PE=1 SV=2 - [DHE3_RAT]	32.62	2	15	15	183	61.3773	8.00146	191.408	29.57	13	60	170.47	26.88	13	71	142.457	23.84	11	52	558
P12075	Cytochrome c oxidase subunit 5B, mitochondrial OS=Rattus norvegicus GN=Cox5b PE=1 SV=2 - [COX5B_RAT]	24.03	1	3	3	168	13.9059	7.78174	55.3417	17.83	2	29	155.665	24.03	3	89	100.669	17.83	2	50	129
Q5RK08	Glioblastoma amplified sequence OS=Rattus norvegicus GN=Gbas PE=2 SV=1 - [Q5RK08_RAT]	37.37	1	9	9	161	32.9209	9.36377	169.468	30.96	6	52	178.017	27.05	7	66	137.23	23.84	5	43	281
P35171	Cytochrome c oxidase subunit 7A2, mitochondrial OS=Rattus norvegicus GN=Cox7a2 PE=1 SV=1 - [CX7A2_RAT]	27.71	1	2	2	155	9.34695	10.272	97.3887	27.71	2	31	189.309	27.71	2	66	188.827	27.71	2	58	83
Q5RJN0	NADH dehydrogenase (Ubiquinone) Fe-S protein 7 OS=Rattus norvegicus GN=Ndufs7 PE=2 SV=1 - [Q5RJN0_RAT]	27.06	1	5	5	151	23.9294	9.99365	72.7606	23.85	4	28	174.269	27.06	5	67	151.737	27.06	5	56	218
P11960	2-oxoisovalerate dehydrogenase subunit alpha, mitochondrial (Fragment) OS=Rattus norvegicus GN=Bckdha PE=1 SV=1 - [ODBA_RAT]	51.47	2	15	15	146	50.1329	7.82568	127.072	36.28	11	46	99.4173	38.78	11	43	151.732	45.58	13	57	441
O35796	Complement component 1 Q subcomponent-binding protein, mitochondrial OS=Rattus norvegicus GN=C1qbp PE=1 SV=2 - [C1QBP_RAT]	22.22	1	5	5	144	30.9775	4.86865	160.522	22.22	5	49	3.04508	4.66	1	1	324.876	22.22	5	94	279
D4A5L9	Protein LOC690675 OS=Rattus norvegicus GN=LOC690675 PE=3 SV=1 - [D4A5L9_RAT]	49.52	3	6	6	143	11.628	9.5835	263.287	49.52	6	71	116.542	48.57	5	38	113.773	48.57	5	34	105
Q5XIC0	Enoyl-CoA delta isomerase 2, mitochondrial OS=Rattus norvegicus GN=Eci2 PE=1 SV=1 - [ECI2_RAT]	23.53	2	6	6	142	42.994	8.98291	113.294	17.39	5	37	127.242	23.53	6	45	149.215	23.53	6	60	391
Q5XIJ3	Isocitrate dehydrogenase 3 (NAD), gamma OS=Rattus norvegicus GN=Idh3g PE=2 SV=1 - [Q5XIJ3_RAT]	28.5	1	7	7	139	42.8232	9.01221	216.774	18.83	3	54	135.266	26.46	6	45	131.686	24.43	5	40	393
P13086	Succinyl-CoA ligase [ADP/GDP-forming] subunit alpha, mitochondrial OS=Rattus norvegicus GN=Suclg1 PE=2 SV=2 - [SUCA_RAT]	28.9	1	7	7	136	36.125	9.48096	147.055	26.01	6	51	112.346	28.9	7	47	100.77	26.3	6	38	346
P26772	10 kDa heat shock protein, mitochondrial OS=Rattus norvegicus GN=Hspe1 PE=1 SV=3 - [CH10_RAT]	52.94	2	5	5	133	10.8949	8.92432	138.33	33.33	3	48	100.176	52.94	5	45	105.756	33.33	3	40	102
B0K020	CDGSH iron-sulfur domain-containing protein 1 OS=Rattus norvegicus GN=Cisd1 PE=3 SV=1 - [CISD1_RAT]	34.26	1	3	3	131	12.0891	8.83643	137.972	34.26	3	41	165.863	34.26	3	45	162.609	25.93	2	45	108
Q2TA68	Dynamin-like 120 kDa protein, mitochondrial OS=Rattus norvegicus GN=Opa1 PE=1 SV=1 - [OPA1_RAT]	31.46	4	23	23	125	111.238	7.53271	122.74	26.67	19	48	84.4369	20.63	15	35	96.8084	22.08	16	42	960
B2RZD6	Ndufa4 protein OS=Rattus norvegicus GN=Ndufa4 PE=4 SV=1 - [B2RZD6_RAT]	65.85	1	4	4	122	9.32087	9.5249	98.6519	26.83	2	38	118.552	65.85	4	55	71.4537	26.83	2	29	82
D3ZRN3	Protein Actbl2 OS=Rattus norvegicus GN=Actbl2 PE=3 SV=1 - [D3ZRN3_RAT]	11.97	2	1	3	120	41.9359	5.49072	77.3764	11.97	3	29	135.684	11.97	3	46	123.541	11.97	3	45	376
Q5BJQ0	Chaperone activity of bc1 complex-like, mitochondrial OS=Rattus norvegicus GN=Adck3 PE=2 SV=1 - [ADCK3_RAT]	20.8	1	9	9	116	72.1797	6.45557	114.27	19.11	8	40	60.1256	17.1	8	20	185.385	18.34	8	56	649
F1LM33	Leucine-rich PPR motif-containing protein, mitochondrial OS=Rattus norvegicus GN=Lrpprc PE=4 SV=2 - [F1LM33_RAT]	21.84	2	24	24	114	156.581	6.60986	171.505	17.96	19	60	56.6996	11.06	13	27	72.5284	13.22	13	27	1392
D4A830	Protein Ppa2 OS=Rattus norvegicus GN=Ppa2 PE=4 SV=1 - [D4A830_RAT]	38.48	1	9	9	112	37.818	7.1665	109.792	38.48	9	35	115.823	38.48	9	39	119.464	35.15	8	38	330
F1LXA0	NADH dehydrogenase (Ubiquinone) 1 alpha subcomplex, 12 (Predicted), isoform CRA_b OS=Rattus norvegicus GN=LOC100910710 PE=4 SV=2 - [F1LXA0_RAT]	53.79	1	6	6	111	17.1667	9.70068	141.49	53.79	6	45	94.4381	46.21	5	42	68.0335	34.48	4	24	145
B1WC61	Acad9 protein OS=Rattus norvegicus GN=Acad9 PE=2 SV=1 - [B1WC61_RAT]	35.68	1	18	18	110	68.7997	7.69385	118.731	26.24	13	45	94.4419	22.56	12	39	66.328	20.48	9	26	625
B2GV15	Dihydrolipoamide branched chain transacylase E2 OS=Rattus norvegicus GN=Dbt PE=2 SV=1 - [B2GV15_RAT]	22.41	1	10	10	108	53.24	8.41162	87.0784	14.11	6	31	79.0889	22.41	10	33	108.918	15.98	7	44	482
Q5XIT9	Methylcrotonoyl-CoA carboxylase beta chain, mitochondrial OS=Rattus norvegicus GN=Mccc2 PE=2 SV=1 - [MCCB_RAT]	43.69	1	17	17	104	61.4784	8.30908	131.595	36.94	12	41	81.3062	25.93	10	29	112.217	33.39	14	34	563
D3ZLT1	NADH dehydrogenase (Ubiquinone) 1 beta subcomplex, 7 (Predicted) OS=Rattus norvegicus GN=Ndufb7 PE=4 SV=1 - [D3ZLT1_RAT]	44.53	1	4	4	104	16.5572	8.45557	76.9073	18.98	2	30	103.993	44.53	4	38	108.644	44.53	4	36	137
F1LP30	Methylcrotonoyl-CoA carboxylase subunit alpha, mitochondrial OS=Rattus norvegicus GN=Mccc1 PE=2 SV=1 - [F1LP30_RAT]	29.09	2	15	15	102	79.2454	7.13721	112.412	24.06	12	36	96.8025	24.2	13	38	80.5151	15.94	9	28	715
Q704S8	Carnitine O-acetyltransferase OS=Rattus norvegicus GN=Crat PE=1 SV=1 - [CACP_RAT]	22.04	1	12	12	101	70.7553	8.54346	87.6909	13.9	7	38	75.997	17.41	9	33	76.1785	15.97	8	30	626
D3ZEN5	Peroxiredoxin-5, mitochondrial (Fragment) OS=Rattus norvegicus GN=Prdx5 PE=2 SV=2 - [D3ZEN5_RAT]	47.83	3	7	7	101	16.9149	7.23975	95.3863	43.48	6	32	81.9322	47.83	7	36	107.263	42.86	5	33	161
D4AE56	Prostaglandin E synthase 2 (Predicted), isoform CRA_b OS=Rattus norvegicus GN=Ptges2 PE=4 SV=1 - [D4AE56_RAT]	31.77	1	8	8	101	43.4242	9.24658	131.467	31.77	8	44	102.396	26.56	7	33	81.7338	23.96	6	24	384
Q8VID1	Dehydrogenase/reductase SDR family member 4 OS=Rattus norvegicus GN=Dhrs4 PE=2 SV=2 - [DHRS4_RAT]	16.85	1	4	4	100	29.8028	9.5542	81.9292	16.85	4	30	85.0867	16.85	4	37	81.5738	16.85	4	33	279
P21571	ATP synthase-coupling factor 6, mitochondrial OS=Rattus norvegicus GN=Atp5j PE=1 SV=1 - [ATP5J_RAT]	44.44	2	8	8	98	12.4866	9.43701	194.181	44.44	6	44	100.078	39.81	5	27	119.445	40.74	4	27	108
M0R7V3	Protein Apoo OS=Rattus norvegicus GN=Apoo PE=4 SV=1 - [M0R7V3_RAT]	55.49	2	5	5	93	18.8116	8.35303	71.8287	31.1	3	24	109.926	55.49	5	36	96.0556	31.1	3	33	164
D3ZCZ9	Protein LOC100912599 OS=Rattus norvegicus GN=LOC100912599 PE=4 SV=1 - [D3ZCZ9_RAT]	36.21	3	4	4	91	13.0317	9.21729	77.2659	30.17	3	24	85.7402	36.21	4	36	81.6993	28.45	2	31	116
D3ZD09	Cytochrome c oxidase subunit 6B1 OS=Rattus norvegicus GN=Cox6b1 PE=4 SV=1 - [D3ZD09_RAT]	27.91	1	3	3	91	10.0649	8.71924	75.2204	26.74	2	36	55.1806	10.47	1	33	34.8028	11.63	2	22	86
P46462	Transitional endoplasmic reticulum ATPase OS=Rattus norvegicus GN=Vcp PE=1 SV=3 - [TERA_RAT]	25.93	4	15	15	88	89.2927	5.26221	103.844	23.08	13	32	67.9505	23.08	14	24	90.3049	20.22	12	32	806
P16409	Myosin light chain 3 OS=Rattus norvegicus GN=Myl3 PE=2 SV=2 - [MYL3_RAT]	56	4	8	10	85	22.1421	5.09717	80.6097	51	8	31	49.4769	51	8	22	78.6808	32.5	6	32	200
Q5XHZ0	Heat shock protein 75 kDa, mitochondrial OS=Rattus norvegicus GN=Trap1 PE=1 SV=1 - [TRAP1_RAT]	31.02	3	17	17	85	80.4108	7.03467	100.414	24.5	13	36	84.3048	25.21	14	31	45.3251	16.29	10	18	706
Q5XIE6	3-hydroxyisobutyryl-CoA hydrolase, mitochondrial OS=Rattus norvegicus GN=Hibch PE=1 SV=2 - [HIBCH_RAT]	36.88	2	11	11	85	42.9973	8.45557	119.527	34.03	10	41	64.7971	30.91	9	24	60.503	27.53	9	20	385
G3V8U8	Branched-chain-amino-acid aminotransferase OS=Rattus norvegicus GN=Bcat2 PE=3 SV=1 - [G3V8U8_RAT]	22.14	2	7	7	84	44.2009	8.1626	97.7333	20.1	6	29	81.8842	16.54	5	29	92.7127	16.54	5	26	393
P35738	2-oxoisovalerate dehydrogenase subunit beta, mitochondrial OS=Rattus norvegicus GN=Bckdhb PE=1 SV=3 - [ODBB_RAT]	22.05	1	5	5	78	42.7958	6.82959	131.854	19.74	4	33	68.8278	22.05	5	18	98.6114	22.05	5	27	390
D3ZZ21	NADH dehydrogenase (Ubiquinone) 1 beta subcomplex, 6 (Predicted) OS=Rattus norvegicus GN=Ndufb6 PE=4 SV=1 - [D3ZZ21_RAT]	48.44	1	4	4	78	15.6283	10.0376	65.2422	14.06	1	24	72.1915	35.94	3	31	59.9328	26.56	2	23	128
Q5U1Z9	Metaxin 2 OS=Rattus norvegicus GN=Mtx2 PE=2 SV=1 - [Q5U1Z9_RAT]	31.56	1	6	6	77	29.699	5.33838	78.1843	31.56	6	26	60.4954	31.56	6	25	73.0221	25.1	5	26	263
F1MA54	3-phosphoinositide-dependent protein kinase 1 OS=Rattus norvegicus GN=Pdk1 PE=2 SV=2 - [F1MA54_RAT]	27.42	2	8	8	76	49.0678	8.00146	82.8542	16.59	5	28	62.2541	19.35	6	24	67.6363	23.73	7	24	434
D3ZA93	Protein Acot13 OS=Rattus norvegicus GN=Acot13 PE=4 SV=1 - [D3ZA93_RAT]	15.71	1	2	2	75	15.2599	8.83643	72.3569	15.71	2	30	57.9065	15.71	2	23	58.3838	15.71	2	22	140
P02770	Serum albumin OS=Rattus norvegicus GN=Alb PE=1 SV=2 - [ALBU_RAT]	14.47	1	7	7	74	68.6861	6.48096	92.6327	12.83	6	35	46.5868	9.87	5	18	60.1183	10.2	5	21	608
D3ZFQ8	Cytochrome c-1 (Predicted), isoform CRA_b OS=Rattus norvegicus GN=Cyc1 PE=4 SV=2 - [D3ZFQ8_RAT]	5.53	1	1	1	74	23.006	10.272	55.0558	5.53	1	23	75.8841	5.53	1	34	38.4612	5.53	1	17	217
G3V8L9	Polymerase I and transcript release factor OS=Rattus norvegicus GN=Ptrf PE=4 SV=1 - [G3V8L9_RAT]	21.68	2	7	7	74	43.882	5.51611	75.181	15.56	5	21	23.5118	10.71	3	7	175.972	19.39	6	46	392
P97532	3-mercaptopyruvate sulfurtransferase OS=Rattus norvegicus GN=Mpst PE=1 SV=3 - [THTM_RAT]	39.39	1	9	9	73	32.9194	6.31592	58.2579	30.3	6	20	66.2088	30.98	7	24	91.1492	32.66	7	29	297
Q5PQZ9	NADH dehydrogenase [ubiquinone] 1 subunit C2 OS=Rattus norvegicus GN=Ndufc2 PE=2 SV=1 - [Q5PQZ9_RAT]	19.17	1	3	3	72	14.3493	9.39307	67.9434	11.67	2	23	85.3513	19.17	3	29	62.506	11.67	2	20	120
B2RYS2	Cytochrome b-c1 complex subunit 7 OS=Rattus norvegicus GN=Uqcrb PE=3 SV=1 - [B2RYS2_RAT]	36.94	1	4	4	71	13.5499	9.30518	153.818	30.63	3	54	30.8444	36.94	4	13	10.7227	30.63	3	4	111
Q6P2A5	Adenylate kinase 3 OS=Rattus norvegicus GN=Ak3 PE=2 SV=1 - [Q6P2A5_RAT]	50.66	2	9	9	71	25.4785	8.85107	87.1613	42.73	8	31	49.1439	50.66	9	25	44.6435	27.75	5	15	227
F1LMM8	[Pyruvate dehydrogenase [lipoamide]] kinase isozyme 2, mitochondrial OS=Rattus norvegicus GN=Pdk2 PE=2 SV=2 - [F1LMM8_RAT]	36.99	3	9	9	67	43.9902	7.35693	94.7833	32.91	7	29	48.1209	14.8	5	18	60.5842	24.74	6	20	392
B0BNE6	NADH dehydrogenase (Ubiquinone) Fe-S protein 8 (Predicted), isoform CRA_a OS=Rattus norvegicus GN=Ndufs8 PE=2 SV=1 - [B0BNE6_RAT]	27.83	1	5	5	66	23.9547	6.21436	79.8432	9.43	2	36	32.7267	16.98	4	16	32.8379	24.53	4	14	212
D3ZKG1	Protein Mut OS=Rattus norvegicus GN=Mut PE=4 SV=1 - [D3ZKG1_RAT]	21.93	1	11	11	66	82.8727	7.03467	91.809	19.92	10	32	38.5147	11.76	6	16	46.9133	11.76	6	18	748
P29410-2	Isoform 2 of Adenylate kinase 2, mitochondrial OS=Rattus norvegicus GN=Ak2 - [KAD2_RAT]	41.38	2	8	8	66	25.5141	6.80029	79.1256	27.59	5	25	68.5013	26.29	5	24	53.0403	25.86	5	17	232
Q5U1W6	Apolipoprotein O-like OS=Rattus norvegicus GN=Apool PE=2 SV=1 - [Q5U1W6_RAT]	38.19	1	7	7	66	28.2196	9.01221	84.198	32.28	6	27	59.5262	33.86	6	20	52.5857	38.19	7	19	254
P05708	Hexokinase-1 OS=Rattus norvegicus GN=Hk1 PE=1 SV=4 - [HXK1_RAT]	13.73	4	11	11	65	102.342	6.7124	55.7461	11.22	9	24	39.2438	8.93	7	20	46.9428	11.22	9	21	918
F1M0B2	Uncharacterized protein (Fragment) OS=Rattus norvegicus GN=LOC683295 PE=4 SV=2 - [F1M0B2_RAT]	4.11	2	1	2	63	57.715	7.88428	67.371	4.11	2	22	57.194	4.11	2	21	56.9805	4.11	2	20	535
Q5I0K3	Citrate lyase subunit beta-like protein, mitochondrial OS=Rattus norvegicus GN=Clybl PE=2 SV=2 - [CLYBL_RAT]	29.88	2	8	8	62	37.2976	7.97217	46.1064	23.96	7	18	51.4274	26.63	7	19	72.1894	29.88	8	25	338
Q80W89	NADH dehydrogenase [ubiquinone] 1 alpha subcomplex subunit 11 OS=Rattus norvegicus GN=Ndufa11 PE=2 SV=1 - [NDUAB_RAT]	24.11	1	2	2	60	14.8443	8.08936	56.556	24.11	2	21	54.203	7.8	1	20	56.514	7.8	1	19	141
A0JPQ4	Tripartite motif-containing protein 72 OS=Rattus norvegicus GN=Trim72 PE=2 SV=1 - [TRI72_RAT]	38.16	1	13	13	60	52.7978	6.26514	71.281	28.09	9	26	30.1351	22.43	9	16	42.4844	20.13	7	18	477
P97519	Hydroxymethylglutaryl-CoA lyase, mitochondrial OS=Rattus norvegicus GN=Hmgcl PE=2 SV=1 - [HMGCL_RAT]	25.85	1	5	5	59	34.1697	8.41162	59.57	25.85	5	20	53.3538	19.08	4	24	45.9209	25.85	5	15	325
F8WFI0	Delta-1-pyrroline-5-carboxylate dehydrogenase, mitochondrial OS=Rattus norvegicus GN=Tas1r2 PE=3 SV=2 - [F8WFI0_RAT]	20.64	4	9	9	59	61.7586	8.04541	64.0057	12.99	5	17	55.9546	20.64	9	23	59.2611	17.62	7	19	562
P04182	Ornithine aminotransferase, mitochondrial OS=Rattus norvegicus GN=Oat PE=1 SV=1 - [OAT_RAT]	23.46	2	8	8	58	48.302	6.99072	47.4583	21.41	6	18	42.8663	19.36	6	20	54.602	21.41	7	20	439
Q9WUS0	GTP:AMP phosphotransferase AK4, mitochondrial OS=Rattus norvegicus GN=Ak4 PE=2 SV=1 - [KAD4_RAT]	37.22	1	7	7	57	25.1873	8.01611	47.4136	32.29	6	24	27.8891	32.29	6	16	31.6645	24.66	5	17	223
P32198	Carnitine O-palmitoyltransferase 1, liver isoform OS=Rattus norvegicus GN=Cpt1a PE=1 SV=2 - [CPT1A_RAT]	4.14	1	2	3	57	88.0687	8.54346	32.5037	2.98	2	19	29.0031	2.46	2	22	25.2644	2.46	2	16	773
P02091	Hemoglobin subunit beta-1 OS=Rattus norvegicus GN=Hbb PE=1 SV=3 - [HBB1_RAT]	50.34	2	3	7	56	15.9692	8.07471	55.268	42.86	5	19	50.8172	49.66	6	20	44.0452	44.22	5	17	147
Q6IMF3	Keratin, type II cytoskeletal 1 OS=Rattus norvegicus GN=Krt1 PE=2 SV=1 - [K2C1_RAT]	7.52	2	4	4	56	64.7911	7.86963	67.5716	7.52	4	23	50.4944	7.52	4	16	58.0949	7.52	4	17	625
Q6PDW8	Glutathione peroxidase OS=Rattus norvegicus GN=Gpx1 PE=2 SV=1 - [Q6PDW8_RAT]	47.59	2	5	5	56	16.4784	7.25439	61.559	41.38	4	21	41.0814	47.59	5	18	35.4143	41.38	4	17	145
D3ZE15	Protein LOC100911483 OS=Rattus norvegicus GN=Ndufa13 PE=4 SV=1 - [D3ZE15_RAT]	48.61	2	6	6	55	16.7657	9.48096	50.7207	48.61	6	21	28.6824	41.67	5	16	44.1912	39.58	5	18	144
P24329	Thiosulfate sulfurtransferase OS=Rattus norvegicus GN=Tst PE=1 SV=3 - [THTR_RAT]	22.9	1	5	5	53	33.3858	7.85498	65.5274	16.5	3	20	47.6493	16.84	4	16	50.8696	16.5	3	17	297
D4A3V2	NADH dehydrogenase [ubiquinone] 1 alpha subcomplex subunit 6 OS=Rattus norvegicus GN=Ndufa6 PE=3 SV=1 - [D4A3V2_RAT]	45.38	1	5	5	53	15.2141	10.1548	32.0501	39.23	4	12	69.7495	45.38	5	26	36.7882	39.23	4	15	130
Q7TQ85	Ac1164 OS=Rattus norvegicus GN=Pdhx PE=2 SV=1 - [Q7TQ85_RAT]	10.95	1	5	5	52	58.7599	8.52881	24.5301	8.35	4	15	36.8911	8.35	4	18	43.7798	8.16	4	19	539
P29147	D-beta-hydroxybutyrate dehydrogenase, mitochondrial OS=Rattus norvegicus GN=Bdh1 PE=1 SV=2 - [BDH_RAT]	18.95	1	5	5	50	38.1773	8.83643	85.6604	18.95	5	24	40.7141	11.37	3	14	42.7167	8.75	2	12	343
P01946	Hemoglobin subunit alpha-1/2 OS=Rattus norvegicus GN=Hba1 PE=1 SV=3 - [HBA_RAT]	52.11	1	5	5	48	15.3188	7.97217	60.5014	37.32	3	18	33.5916	52.11	5	15	46.8696	43.66	4	15	142
D3ZJX5	Protein Timm50 OS=Rattus norvegicus GN=LOC687295 PE=4 SV=2 - [D3ZJX5_RAT]	23.23	1	6	6	48	39.8297	8.1333	55.7156	23.23	6	17	50.8681	20.4	5	17	48.362	15.58	4	14	353
Q6AXV4	Sorting and assembly machinery component 50 homolog OS=Rattus norvegicus GN=Samm50 PE=1 SV=1 - [SAM50_RAT]	17.91	1	7	7	47	51.9274	6.80029	18.4218	5.12	2	8	33.785	14.29	6	23	28.4472	13.22	5	16	469
D3ZIN5	Protein Vwa8 (Fragment) OS=Rattus norvegicus GN=Vwa8 PE=4 SV=2 - [D3ZIN5_RAT]	10.82	1	11	12	47	150.188	6.68311	31.4714	7.69	9	17	32.9518	5.97	7	16	30.1369	6.19	7	14	1340
D3ZQV0	Protein LOC100365995 OS=Rattus norvegicus GN=LOC100365995 PE=3 SV=1 - [D3ZQV0_RAT]	8.13	2	1	1	47	26.2489	5.32568	30.2774	8.13	1	9	90.8038	8.13	1	30	24.3583	8.13	1	8	246
D4A565	NADH dehydrogenase (Ubiquinone) 1 beta subcomplex, 5 (Predicted), isoform CRA_b OS=Rattus norvegicus GN=Ndufb5 PE=4 SV=1 - [D4A565_RAT]	12.7	1	2	2	47	21.6505	9.46631	38.6769	12.7	2	15	39.0847	12.7	2	14	46.5038	12.7	2	18	189
P07632	Superoxide dismutase [Cu-Zn] OS=Rattus norvegicus GN=Sod1 PE=1 SV=2 - [SODC_RAT]	32.47	1	4	4	46	15.9018	6.354	37.2728	32.47	4	14	40.6914	32.47	4	16	36.9966	32.47	4	16	154
P97576	GrpE protein homolog 1, mitochondrial OS=Rattus norvegicus GN=Grpel1 PE=1 SV=2 - [GRPE1_RAT]	29.03	1	5	5	46	24.2819	8.38232	50.1582	23.96	4	20	23.7516	23.96	4	11	34.9609	29.03	5	15	217
Q9QZ76	Myoglobin OS=Rattus norvegicus GN=Mb PE=1 SV=3 - [MYG_RAT]	33.12	1	4	4	46	17.146	8.104	67.7247	33.12	4	19	48.6435	32.47	3	13	45.2008	32.47	3	14	154
G3V741	Phosphate carrier protein, mitochondrial OS=Rattus norvegicus GN=Slc25a3 PE=3 SV=1 - [G3V741_RAT]	16.57	2	5	5	45	39.5054	9.26123	20.3751	6.46	2	8	56.134	16.57	5	20	50.6948	10.67	3	17	356
P08733	Myosin regulatory light chain 2, ventricular/cardiac muscle isoform OS=Rattus norvegicus GN=Myl2 PE=1 SV=2 - [MLRV_RAT]	53.61	3	7	7	44	18.8684	4.93213	35.9632	36.14	4	14	25.536	21.69	3	9	57.8888	53.61	7	21	166
D4A197	Methylmalonyl CoA epimerase (Predicted), isoform CRA_d OS=Rattus norvegicus GN=Mcee PE=4 SV=1 - [D4A197_RAT]	34.27	1	3	3	44	18.8039	8.82178	66.1401	34.27	3	18	57.7298	34.27	3	15	43.4359	34.27	3	11	178
D4A4P3	Protein LOC100361144 OS=Rattus norvegicus GN=LOC100361144 PE=4 SV=1 - [D4A4P3_RAT]	28.28	2	2	2	44	11.2596	9.0415	17.4134	11.11	1	8	58.6938	28.28	2	23	38.2922	28.28	2	13	99
F1LMM9	Elongation factor G, mitochondrial OS=Rattus norvegicus GN=Gfm1 PE=2 SV=1 - [F1LMM9_RAT]	20.99	2	12	12	43	83.2595	7.1665	37.2961	14.04	7	13	38.6503	12.43	7	14	45.2098	15.37	9	16	748
Q924S5	Lon protease homolog, mitochondrial OS=Rattus norvegicus GN=Lonp1 PE=2 SV=1 - [LONM_RAT]	16.74	1	10	10	41	105.726	6.59521	38.7174	10.32	6	14	47.1387	10.42	6	14	32.2422	14	8	13	950
Q68FT3	Pyridine nucleotide-disulfide oxidoreductase domain-containing protein 2 OS=Rattus norvegicus GN=Pyroxd2 PE=2 SV=1 - [PYRD2_RAT]	19.62	1	8	8	41	62.8394	8.17725	42.6581	16.52	6	15	35.3813	17.38	7	16	27.233	13.6	5	10	581
Q5XIG9	Mitochondrial protein 18 kDa OS=Rattus norvegicus GN=Mtfp1 PE=2 SV=1 - [Q5XIG9_RAT]	33.73	1	5	5	41	18.3547	9.45166	53.3829	27.11	4	19	35.1242	33.13	4	12	31.1733	26.51	3	10	166
Q68FU7	Ubiquinone biosynthesis monooxygenase COQ6 OS=Rattus norvegicus GN=Coq6 PE=2 SV=1 - [COQ6_RAT]	19.96	1	8	8	41	51.4631	7.21045	29.8484	18.28	7	14	23.9329	14.29	6	14	26.9606	12.61	5	13	476
P11951	Cytochrome c oxidase subunit 6C-2 OS=Rattus norvegicus GN=Cox6c2 PE=1 SV=3 - [CX6C2_RAT]	36.84	2	3	3	40	8.44945	10.0669	16.2004	27.63	2	8	23.6272	36.84	3	28	7.29017	36.84	3	4	76
Q6IFW6	Keratin, type I cytoskeletal 10 OS=Rattus norvegicus GN=Krt10 PE=2 SV=1 - [K1C10_RAT]	12.74	13	4	6	40	56.4705	5.14795	53.8717	9.7	4	21	20.1234	6.84	4	9	21.7813	3.42	2	10	526
P42123	L-lactate dehydrogenase B chain OS=Rattus norvegicus GN=Ldhb PE=1 SV=2 - [LDHB_RAT]	29.04	1	8	8	39	36.5891	6.04932	36.436	18.86	5	13	39.0808	24.55	7	14	35.1615	23.35	6	12	334
Q4G069	Regulator of microtubule dynamics protein 1 OS=Rattus norvegicus GN=Rmdn1 PE=2 SV=1 - [RMD1_RAT]	25.81	1	6	6	39	35.3782	7.73779	47.8086	19.68	4	14	27.366	18.39	5	13	35.1079	18.39	5	12	310
D3ZAF6	ATP synthase subunit f, mitochondrial OS=Rattus norvegicus GN=Atp5j2 PE=1 SV=1 - [ATPK_RAT]	23.86	1	2	2	39	10.4456	10.0376	17.6097	13.64	1	11	22.1447	13.64	1	15	23.0147	23.86	2	13	88
B0BNJ9	RCG44002, isoform CRA_a OS=Rattus norvegicus GN=Tmem14c PE=4 SV=1 - [B0BNJ9_RAT]	75.44	3	4	4	39	11.65	9.64209	23.8958	50	3	8	35.1651	75.44	4	20	25.9246	50	3	11	114
D3ZS58	NADH dehydrogenase [ubiquinone] 1 alpha subcomplex subunit 2 OS=Rattus norvegicus GN=Ndufa2 PE=3 SV=1 - [D3ZS58_RAT]	30.93	1	3	3	39	10.8378	9.71533	31.9878	23.71	2	11	33.5787	30.93	3	17	28.2906	23.71	2	11	97
G3V945	Aldehyde dehydrogenase family 5, subfamily A1 OS=Rattus norvegicus GN=Aldh5a1 PE=3 SV=1 - [G3V945_RAT]	18.55	4	7	7	39	56.1099	8.08936	45.1355	18.55	7	17	24.1952	9.56	4	10	29.4189	9.56	4	12	523
M0R570	5-hydroxytryptamine receptor 2B OS=Rattus norvegicus GN=Srl PE=4 SV=1 - [M0R570_RAT]	32.42	2	11	11	39	54.2701	6.63916	44.0245	24.79	8	15	41.3831	20.76	7	14	28.2865	10.59	4	10	472
P04692	Tropomyosin alpha-1 chain OS=Rattus norvegicus GN=Tpm1 PE=1 SV=3 - [TPM1_RAT]	34.15	13	7	9	38	32.6607	4.7417	52.1609	26.41	7	19	6.12653	10.56	3	3	39.3818	20.42	6	16	284
Q6PCU8	NADH dehydrogenase [ubiquinone] flavoprotein 3, mitochondrial OS=Rattus norvegicus GN=Ndufv3 PE=3 SV=1 - [NDUV3_RAT]	19.44	1	2	2	38	11.9343	9.40771	35.715	19.44	2	16	21.9053	13.89	1	11	22.7488	13.89	1	11	108
G3V879	Ubiquinone biosynthesis protein COQ7 homolog OS=Rattus norvegicus GN=Coq7 PE=4 SV=2 - [G3V879_RAT]	35.2	2	5	5	38	20.1132	5.75732	43.9618	35.2	4	17	21.7019	16.2	3	8	38.087	21.23	3	13	179
G3V908	Protein Kb15 OS=Rattus norvegicus GN=Kb15 PE=2 SV=2 - [G3V908_RAT]	6.58	10	1	3	38	57.5738	7.94287	41.8695	4.51	2	12	38.2974	4.32	2	14	38.5353	4.32	2	12	532
P10817	Cytochrome c oxidase subunit 6A2, mitochondrial (Fragment) OS=Rattus norvegicus GN=Cox6a2 PE=1 SV=3 - [CX6A2_RAT]	43.62	2	2	2	37	10.4803	9.0708	57.3451	43.62	2	26	10.2261	43.62	2	5	14.2109	43.62	2	6	94
P07483	Fatty acid-binding protein, heart OS=Rattus norvegicus GN=Fabp3 PE=1 SV=2 - [FABPH_RAT]	31.58	1	4	4	36	14.7656	6.32861	11.7196	14.29	2	5	35.9766	31.58	4	17	32.0192	24.81	3	14	133
D3ZA85	Histone cell cycle regulation defective interacting protein 5 (Predicted), isoform CRA_a OS=Rattus norvegicus GN=Nfu1 PE=4 SV=1 - [D3ZA85_RAT]	15.81	1	3	3	36	28.3493	4.95752	35.9903	15.81	3	11	6.04691	11.07	2	2	77.4436	15.81	3	23	253
P00406	Cytochrome c oxidase subunit 2 OS=Rattus norvegicus GN=Mtco2 PE=2 SV=2 - [COX2_RAT]	23.35	2	4	4	35	25.9251	4.729	37.1323	13.22	2	12	18.7186	16.3	3	8	39.4775	20.26	3	15	227
Q5XIF3	NADH dehydrogenase [ubiquinone] iron-sulfur protein 4, mitochondrial OS=Rattus norvegicus GN=Ndufs4 PE=1 SV=1 - [NDUS4_RAT]	25.71	1	4	4	34	19.7282	10.1401	61.8351	25.71	4	22	20.197	14.29	2	8	11.4711	14.29	2	4	175
Q64057	Alpha-aminoadipic semialdehyde dehydrogenase OS=Rattus norvegicus GN=Aldh7a1 PE=1 SV=2 - [AL7A1_RAT]	15.21	1	6	6	33	58.7114	7.86963	25.1909	10.95	4	8	34.9616	15.21	6	14	32.5864	10.95	4	11	539
F7FFV2	Keratin, type II cytoskeletal 5 (Fragment) OS=Rattus norvegicus GN=Krt5 PE=3 SV=1 - [F7FFV2_RAT]	5.56	2	1	2	33	44.116	5.33838	41.1415	5.56	2	12	32.8701	5.56	2	12	29.6943	3.03	1	9	396
M0RAD5	ATP-dependent Clp protease proteolytic subunit OS=Rattus norvegicus GN=Clpp PE=3 SV=1 - [M0RAD5_RAT]	26.1	1	5	5	33	29.7032	7.85498	41.7601	26.1	5	11	39.8911	17.65	3	11	40.9438	17.65	3	11	272
P24268	Cathepsin D OS=Rattus norvegicus GN=Ctsd PE=1 SV=1 - [CATD_RAT]	12.04	2	4	4	32	44.6519	7.09326	31.6683	12.04	4	11	30.6286	12.04	4	13	24.4727	9.83	3	8	407
A1L1J4	Protein phosphatase 2C, magnesium dependent, catalytic subunit OS=Rattus norvegicus GN=Pdp1 PE=2 SV=1 - [A1L1J4_RAT]	24.35	2	8	8	32	61.1416	6.66846	31.0854	13.2	5	11	14.1273	5.76	2	8	38.1496	18.77	6	13	538
B2RYW3	NADH dehydrogenase (Ubiquinone) 1 beta subcomplex, 9 OS=Rattus norvegicus GN=Ndufb9 PE=2 SV=1 - [B2RYW3_RAT]	11.17	1	1	1	32	21.8778	8.07471	88.3407	11.17	1	18	33.9678	11.17	1	8	26.1816	11.17	1	6	179
B2GUZ6	Protein Rtn4ip1 OS=Rattus norvegicus GN=Rtn4ip1 PE=2 SV=1 - [B2GUZ6_RAT]	14.39	1	4	4	31	43.5776	9.20264	28.9072	14.39	4	11	31.6874	10.35	3	13	20.2383	7.58	2	7	396
P16086	Spectrin alpha chain, non-erythrocytic 1 OS=Rattus norvegicus GN=Sptan1 PE=1 SV=2 - [SPTN1_RAT]	9.22	2	16	16	30	284.462	5.32568	19.7029	4.25	7	8	17.9978	5.1	9	10	26.0284	5.5	10	12	2472
P70584	Short/branched chain specific acyl-CoA dehydrogenase, mitochondrial OS=Rattus norvegicus GN=Acadsb PE=1 SV=1 - [ACDSB_RAT]	12.5	1	4	4	30	47.7933	8.06006	19.3882	9.49	3	9	23.6633	12.5	4	13	13.8902	12.5	4	8	432
P11517	Hemoglobin subunit beta-2 OS=Rattus norvegicus PE=1 SV=2 - [HBB2_RAT]	34.01	2	1	5	30	15.9723	8.79248	28.973	26.53	3	11	23.9437	33.33	4	10	22.1828	34.01	4	9	147
Q5XIN6	LETM1 and EF-hand domain-containing protein 1, mitochondrial OS=Rattus norvegicus GN=Letm1 PE=1 SV=1 - [LETM1_RAT]	18.67	1	9	9	30	83.0079	6.59521	34.3809	11.5	5	11	6.94953	4.6	2	2	40.0993	16.1	7	17	739
B5DEL8	NADH dehydrogenase (Ubiquinone) Fe-S protein 5 OS=Rattus norvegicus GN=Ndufs5 PE=4 SV=1 - [B5DEL8_RAT]	11.32	2	1	1	30	12.6915	8.92432	74.3109	11.32	1	21	12.7916	11.32	1	4	17.3757	11.32	1	5	106
D3ZKE6	Sarcolemma associated protein (Predicted) OS=Rattus norvegicus GN=Slmap PE=4 SV=1 - [D3ZKE6_RAT]	12.07	2	10	10	30	90.504	5.19873	21.4016	9.53	7	8	35.9648	12.07	10	15	16.1871	7.5	5	7	787
F1M5N4	Malic enzyme OS=Rattus norvegicus GN=Me3 PE=2 SV=2 - [F1M5N4_RAT]	25.12	1	11	11	30	67.1657	7.97217	33.8467	19.34	8	13	14.3786	10.25	5	10	18.8138	9.92	5	7	605
P97521	Mitochondrial carnitine/acylcarnitine carrier protein OS=Rattus norvegicus GN=Slc25a20 PE=1 SV=1 - [MCAT_RAT]	13.62	2	4	4	29	33.1322	9.48096	2.86886	5.32	1	1	26.4114	8.31	3	21	8.35197	5.65	2	7	301
Q03346	Mitochondrial-processing peptidase subunit beta OS=Rattus norvegicus GN=Pmpcb PE=1 SV=3 - [MPPB_RAT]	21.06	1	7	7	29	54.2304	6.69775	19.1375	6.75	3	7	27.0442	15.13	6	10	37.2499	18.81	6	12	489
A9UMV9	Ndufa7 protein OS=Rattus norvegicus GN=Ndufa7 PE=4 SV=1 - [A9UMV9_RAT]	31.25	1	3	3	29	12.4926	10.4771	8.29142	21.43	2	5	21.3733	31.25	3	12	25.1262	31.25	3	12	112
D3ZDE4	Deoxyguanosine kinase (Predicted), isoform CRA_a OS=Rattus norvegicus GN=Dguok PE=4 SV=1 - [D3ZDE4_RAT]	23.38	1	5	5	29	32.2073	7.95752	25.0337	17.27	3	7	26.8172	20.14	4	13	14.3654	20.5	4	9	278
F1LU71	AU RNA binding protein/enoyl-coenzyme A hydratase (Predicted), isoform CRA_a OS=Rattus norvegicus GN=Auh PE=3 SV=2 - [F1LU71_RAT]	22.86	1	6	6	29	33.32	9.42236	34.2894	16.83	4	12	17.4698	13.65	3	9	18.865	19.05	5	8	315
P24473	Glutathione S-transferase kappa 1 OS=Rattus norvegicus GN=Gstk1 PE=1 SV=3 - [GSTK1_RAT]	39.38	1	7	7	28	25.4763	9.0708	36.361	29.2	5	13	9.94585	19.47	4	5	38.3019	24.78	4	10	226
P62076	Mitochondrial import inner membrane translocase subunit Tim13 OS=Rattus norvegicus GN=Timm13 PE=3 SV=1 - [TIM13_RAT]	36.84	1	3	3	28	10.4509	8.17725	26.1457	36.84	3	10	23.3805	36.84	3	8	28.7627	36.84	3	10	95
Q497B0	Omega-amidase NIT2 OS=Rattus norvegicus GN=Nit2 PE=1 SV=1 - [NIT2_RAT]	30.8	1	7	7	28	30.6817	7.29834	31.4072	22.83	5	10	25.309	18.84	4	8	31.9903	26.45	5	10	276
D4A9W3	Protein RGD1311756 OS=Rattus norvegicus GN=RGD1311756 PE=4 SV=1 - [D4A9W3_RAT]	16.5	1	8	8	28	66.0141	6.68311	36.7977	11	5	12	29.2852	16.5	8	11	15.1333	8.9	4	5	618
D3ZXK4	Protein Abhd11 OS=Rattus norvegicus GN=Abhd11 PE=4 SV=1 - [D3ZXK4_RAT]	11.4	1	3	3	27	33.1953	9.30518	32.855	11.4	3	12	15.0854	7.49	2	7	20.8929	7.49	2	8	307
M0RAK2	Protein Isoc2a OS=Rattus norvegicus GN=Isoc2a PE=4 SV=1 - [M0RAK2_RAT]	42.36	1	4	4	27	22.2339	8.6167	58.0888	33.5	3	12	39.7709	42.36	4	9	27.9153	24.63	2	6	203
Q9JLJ3	4-trimethylaminobutyraldehyde dehydrogenase OS=Rattus norvegicus GN=Aldh9a1 PE=1 SV=1 - [AL9A1_RAT]	8.7	1	4	4	26	53.618	6.91748	10.6305	4.05	2	7	13.2495	6.28	3	7	18.6283	6.48	3	12	494
Q58FK9	Kynurenine--oxoglutarate transaminase 3 OS=Rattus norvegicus GN=Ccbl2 PE=2 SV=1 - [KAT3_RAT]	23.79	2	8	8	26	51.0113	8.35303	36.8452	17.4	7	12	20.617	11.67	3	7	18.6148	14.32	4	7	454
G3V6I5	Protein Dnaja3 OS=Rattus norvegicus GN=Dnaja3 PE=3 SV=1 - [G3V6I5_RAT]	20.83	1	6	6	26	52.3704	9.27588	43.2848	9.17	3	14	21.2568	13.96	4	7	13.3527	11.04	3	5	480
D4A4L5	Protein RGD1563216 OS=Rattus norvegicus GN=Isca2 PE=4 SV=1 - [D4A4L5_RAT]	36.36	1	5	5	25	16.6694	5.2749	21.3244	31.17	4	8		0			50.2314	36.36	5	17	154
P97852	Peroxisomal multifunctional enzyme type 2 OS=Rattus norvegicus GN=Hsd17b4 PE=1 SV=3 - [DHB4_RAT]	11.16	1	6	6	24	79.378	8.57275	13.6725	8.03	4	6	11.7718	4.9	3	5	26.3166	4.9	3	13	735
P06761	78 kDa glucose-regulated protein OS=Rattus norvegicus GN=Hspa5 PE=1 SV=1 - [GRP78_RAT]	20.95	3	8	10	23	72.3024	5.16064	22.9188	12.08	6	8	11.5707	8.72	4	4	29.4595	16.21	8	11	654
B2RYW9	Fumarylacetoacetate hydrolase domain-containing protein 2 OS=Rattus norvegicus GN=Fahd2 PE=1 SV=1 - [FAHD2_RAT]	19.49	1	5	5	23	34.5591	8.35303	11.4752	14.06	3	4	22.1173	12.14	3	9	23.0321	15.02	4	10	313
Q7TP78	Aa2-258 OS=Rattus norvegicus GN=Ndufa8 PE=2 SV=1 - [Q7TP78_RAT]	6.88	1	1	1	23	21.952	8.104	14.1363	6.88	1	11	14.6149	6.88	1	8	3.20126	6.88	1	4	189
Q64119	Myosin light polypeptide 6 OS=Rattus norvegicus GN=Myl6 PE=1 SV=3 - [MYL6_RAT]	48.34	6	5	7	22	16.9641	4.55127	18.5254	41.06	5	7	2.24621	7.95	1	1	36.7869	35.1	4	14	151
Q63159	Hexaprenyldihydroxybenzoate methyltransferase, mitochondrial OS=Rattus norvegicus GN=Coq3 PE=2 SV=2 - [COQ3_RAT]	14.49	1	4	4	22	38.6836	7.97217	21.9674	11.3	3	8	15.983	12.17	3	6	23.4505	12.17	3	8	345
P80432	Cytochrome c oxidase subunit 7C, mitochondrial OS=Rattus norvegicus GN=Cox7c PE=1 SV=2 - [COX7C_RAT]	14.29	1	1	1	22	7.36993	11.0044	3.89114	14.29	1	2	19.4404	14.29	1	12	17.4805	14.29	1	8	63
D3ZUX7	Protein Acsf3 OS=Rattus norvegicus GN=Acsf3 PE=4 SV=1 - [D3ZUX7_RAT]	18.52	1	8	8	22	65.2248	8.68994	17.5622	10.63	4	6	18.7169	12.69	6	10	17.5192	10.29	4	6	583
D3ZXA6	Protein Pdpr OS=Rattus norvegicus GN=Pdpr PE=3 SV=1 - [D3ZXA6_RAT]	13.78	1	10	10	22	98.7556	6.48096	25.5621	10.48	7	9	18.4712	6.38	5	8	14.4642	5.47	4	5	878
D4A4D5	Protein LOC100362751 OS=Rattus norvegicus GN=LOC498555 PE=3 SV=1 - [D4A4D5_RAT]	66.96	3	4	4	22	11.6989	4.53857	23.3625	66.96	4	7		0			52.3606	66.96	4	15	115
Q4FZT8	SPRY domain-containing protein 4 OS=Rattus norvegicus GN=Spryd4 PE=2 SV=1 - [SPRY4_RAT]	44.44	1	9	9	21	23.2351	9.34912	16.3531	31.88	5	7	12.8178	32.85	8	9	12.1524	30.92	5	5	207
F1M8L6	Protein Ndufa3 OS=Rattus norvegicus GN=Ndufa3 PE=2 SV=1 - [F1M8L6_RAT]	28.57	2	1	1	21	9.3798	8.49951	6.83208	28.57	1	7	14.6242	28.57	1	6	14.765	28.57	1	8	84
M0RDK9	Protein Acad8 (Fragment) OS=Rattus norvegicus GN=Acad8 PE=3 SV=1 - [M0RDK9_RAT]	10.61	1	3	3	21	33.2806	8.39697	14.3997	10.61	3	6	7.52834	10.61	3	4	25.0976	10.61	3	11	311
Q920F5-2	Isoform Cytoplasmic+peroxisomal of Malonyl-CoA decarboxylase, mitochondrial OS=Rattus norvegicus GN=Mlycd - [DCMC_RAT]	21.37	2	6	6	21	50.653	7.69385	19.8568	10.13	3	7	20.4096	13.66	4	7	17.3551	9.91	3	7	454
Q07936	Annexin A2 OS=Rattus norvegicus GN=Anxa2 PE=1 SV=2 - [ANXA2_RAT]	24.48	2	7	7	20	38.6538	7.69385	29.1455	21.83	6	11	1.97764	5.9	2	2	18.8553	18.88	5	7	339
Q4G064	2-methoxy-6-polyprenyl-1,4-benzoquinol methylase, mitochondrial OS=Rattus norvegicus GN=Coq5 PE=2 SV=1 - [COQ5_RAT]	22.94	1	6	6	20	37.2771	8.80713	26.8986	11.31	3	9	18.5718	18.35	4	7	10.5475	15.29	3	4	327
Q5HZA9	Transmembrane protein 126A OS=Rattus norvegicus GN=Tmem126a PE=2 SV=1 - [T126A_RAT]	16.84	1	3	3	20	21.6436	9.53955		0			33.8665	16.84	3	16	8.07156	8.67	2	4	196
D4A7N7	Protein Ttc39d OS=Rattus norvegicus GN=Ttc39d PE=4 SV=1 - [D4A7N7_RAT]	1.32	1	1	1	20	69.9719	7.98682		0			37.5538	1.32	1	19	1.8303	1.32	1	1	604
F1LN92	Protein Afg3l2 OS=Rattus norvegicus GN=Afg3l2 PE=2 SV=1 - [F1LN92_RAT]	5.49	4	5	5	20	89.2955	8.60205	23.0073	5.49	5	10	11.3065	3.37	3	5	8.35704	3.37	3	5	802
M0R5K3	Protein LOC100910772 OS=Rattus norvegicus GN=LOC100910772 PE=4 SV=1 - [M0R5K3_RAT]	28.75	2	2	2	20	9.02169	10.0083	22.0424	16.25	1	7	12.2872	16.25	1	5	21.1503	28.75	2	8	80
Q75Q41	Mitochondrial import receptor subunit TOM22 homolog OS=Rattus norvegicus GN=Tomm22 PE=1 SV=1 - [TOM22_RAT]	33.8	1	3	3	19	15.4808	4.33545	15.9365	16.2	2	5		0			42.1009	33.8	3	14	142
P10960	Sulfated glycoprotein 1 OS=Rattus norvegicus GN=Psap PE=1 SV=1 - [SAP_RAT]	5.96	2	4	4	19	61.0836	5.24951	25.2626	5.96	4	9	3.51902	3.79	2	2	22.2213	3.79	2	8	554
Q9WVK3	Peroxisomal trans-2-enoyl-CoA reductase OS=Rattus norvegicus GN=Pecr PE=2 SV=1 - [PECR_RAT]	17.16	1	3	3	19	32.4126	8.68994	21.253	17.16	3	9	12.1374	9.9	2	6	9.13439	2.97	1	4	303
P29117	Peptidyl-prolyl cis-trans isomerase F, mitochondrial OS=Rattus norvegicus GN=Ppif PE=1 SV=2 - [PPIF_RAT]	16.02	1	2	2	19	21.7961	9.14404	9.87068	11.65	1	3	25.3723	16.02	2	13	6.72992	16.02	2	3	206
G3V9Z3	Amine oxidase [flavin-containing] A OS=Rattus norvegicus GN=Maoa PE=4 SV=1 - [G3V9Z3_RAT]	8.94	2	4	4	19	59.4827	7.92822	17.5109	6.84	3	6	11.6888	4.37	2	4	18.7214	6.46	3	9	526
P10818	Cytochrome c oxidase subunit 6A1, mitochondrial OS=Rattus norvegicus GN=Cox6a1 PE=1 SV=2 - [CX6A1_RAT]	33.33	1	2	2	18	12.2933	9.31982	13.4697	33.33	2	4	22.9427	33.33	2	8	22.5022	33.33	2	6	111
M0RBL9	Protein Vwa8 (Fragment) OS=Rattus norvegicus GN=Vwa8 PE=4 SV=1 - [M0RBL9_RAT]	11.57	2	6	7	18	78.9472	6.88818	14.432	8.86	5	6	10.5451	4.71	3	5	5.5641	4.57	3	7	700
Q62669	Protein Hbb-b1 OS=Rattus norvegicus GN=Hbb-b1 PE=3 SV=1 - [Q62669_RAT]	16.33	1	1	2	18	16.0123	8.19189	23.0743	16.33	2	10	10.9304	8.16	1	4	10.8851	8.16	1	4	147
P58775	Tropomyosin beta chain OS=Rattus norvegicus GN=Tpm2 PE=2 SV=1 - [TPM2_RAT]	11.97	3	1	3	17	32.8166	4.70361	26.0111	8.1	2	9	2.26351	3.52	1	1	15.5984	11.97	3	7	284
Q4QQV3	Protein FAM162A OS=Rattus norvegicus GN=Fam162a PE=2 SV=1 - [F162A_RAT]	18.71	2	2	2	17	17.8155	9.99365	15.2546	18.71	2	6	20.3311	18.71	2	6	17.1259	18.71	2	5	155
Q6MGB5	Estradiol 17-beta-dehydrogenase 8 OS=Rattus norvegicus GN=Hsd17b8 PE=3 SV=1 - [DHB8_RAT]	15.44	1	3	3	17	26.7738	6.55127	10.6113	10.42	2	4	16.442	15.44	3	6	20.3968	15.44	3	7	259
P57113	Maleylacetoacetate isomerase OS=Rattus norvegicus GN=Gstz1 PE=1 SV=2 - [MAAI_RAT]	34.26	1	4	4	17	23.9456	7.76709	22.0016	13.89	2	7	16.3165	26.39	3	5	15.3328	34.26	4	5	216
D3ZAQ0	Protein Fundc2 OS=Rattus norvegicus GN=Fundc2 PE=4 SV=1 - [D3ZAQ0_RAT]	21.19	1	4	4	17	16.3337	10.0522	2.23565	12.58	2	3	13.7955	21.19	4	6	16.0059	20.53	3	8	151
D3ZX74	Coenzyme Q10 homolog A (Yeast) (Predicted), isoform CRA_b OS=Rattus norvegicus GN=Coq10a PE=4 SV=1 - [D3ZX74_RAT]	22.58	1	4	4	17	24.6825	8.93896	20.2622	18.43	3	7	7.92921	10.14	2	4	11.3868	10.14	2	6	217
F1LP21	Protein Timm8a1 OS=Rattus norvegicus GN=Timm8a1 PE=2 SV=2 - [F1LP21_RAT]	22.68	4	2	2	17	10.9483	4.95752	13.9087	11.34	1	5	13.0347	22.68	2	5	18.5355	22.68	2	7	97
O08776-4	Isoform 4 of NADH dehydrogenase [ubiquinone] 1 alpha subcomplex assembly factor 3 OS=Rattus norvegicus GN=Ndufaf3 - [NDUF3_RAT]	29.05	4	4	4	17	19.851	7.84033	18.777	29.05	4	7	16.1878	29.05	4	6	11.9837	23.46	3	4	179
P70623	Fatty acid-binding protein, adipocyte OS=Rattus norvegicus GN=Fabp4 PE=2 SV=3 - [FABP4_RAT]	25.76	2	3	3	16	14.6986	7.94287	12.0968	18.94	2	4	18.2812	15.91	2	8	12.5257	18.94	2	4	132
D3ZL85	Protein Hccs OS=Rattus norvegicus GN=Hccs PE=4 SV=1 - [D3ZL85_RAT]	15.33	1	4	4	16	31.1099	6.72705	17.5827	8.76	2	6	15.3605	11.31	3	5	17.7643	7.3	2	5	274
D3ZVS2	L-2-hydroxyglutarate dehydrogenase (Predicted) OS=Rattus norvegicus GN=L2hgdh PE=4 SV=1 - [D3ZVS2_RAT]	19.65	1	7	7	16	50.7005	8.48486	27.0453	19.65	7	11	7.63514	8.42	3	4	3.04157	3.67	1	1	463
D3ZYX8	Cytochrome c oxidase subunit VIIa polypeptide 2 like (Predicted), isoform CRA_e OS=Rattus norvegicus GN=Cox7a2l PE=4 SV=1 - [D3ZYX8_RAT]	28.33	1	3	3	16	13.265	9.74463	9.56836	10.83	1	3	14.8059	28.33	3	7	14.8301	20.83	2	6	120
M0RCB1	Uncharacterized protein OS=Rattus norvegicus PE=3 SV=1 - [M0RCB1_RAT]	17.78	10	6	8	16	70.386	5.59229	20.8013	11.86	5	7	9.1895	5.93	3	4	9.14418	6.08	3	5	641
Q5U2X8	Acyl-CoA thioesterase 9 OS=Rattus norvegicus GN=Acot9 PE=2 SV=1 - [Q5U2X8_RAT]	18.68	1	5	6	16	50.4109	8.63135	19.7064	14.35	4	7	5.28067	7.52	3	4	12.8561	10.93	3	5	439
P69897	Tubulin beta-5 chain OS=Rattus norvegicus GN=Tubb5 PE=1 SV=1 - [TBB5_RAT]	16.67	9	5	5	15	49.639	4.89404	13.0095	14.41	4	5	4.08709	2.25	1	2	24.5929	8.11	3	8	444
Q5XIJ4	Protein FAM210A OS=Rattus norvegicus GN=Fam210a PE=2 SV=1 - [F210A_RAT]	4.76	1	1	1	15	31.4546	9.81787	22.9533	4.76	1	8	13.309	4.76	1	4	7.39681	4.76	1	3	273
Q6IRK9	Carboxypeptidase Q OS=Rattus norvegicus GN=Cpq PE=1 SV=1 - [CBPQ_RAT]	16.1	1	5	5	15	52.0086	6.41748	7.39513	9.53	3	4	10.5697	6.57	3	5	13.916	8.9	3	6	472
D4A786	Protein LOC100360002 OS=Rattus norvegicus GN=LOC100362685 PE=4 SV=1 - [D4A786_RAT]	18.97	3	2	2	15	6.37736	9.83252	15.3371	17.24	1	6	13.7386	18.97	2	6	6.7039	17.24	1	3	58
M0R9Q9	Cytosol aminopeptidase (Fragment) OS=Rattus norvegicus GN=Lap3 PE=3 SV=1 - [M0R9Q9_RAT]	18.69	3	6	6	15	52.5947	6.48096	15.0117	10.47	4	6	5.46813	4.93	2	2	14.0164	17.04	5	7	487
P23562-2	Isoform Kidney of Band 3 anion transport protein OS=Rattus norvegicus GN=Slc4a1 - [B3AT_RAT]	12.38	3	6	6	15	94.0928	6.63916	20.8957	3.77	2	10		0			10.7008	8.61	4	5	848
Q4PP99	Cardiac troponin C OS=Rattus norvegicus GN=Tnnc1 PE=2 SV=1 - [Q4PP99_RAT]	9.32	1	2	2	15	18.4085	4.18311	22.6817	9.32	2	8	20.7503	9.32	2	7		0			161
P00787	Cathepsin B OS=Rattus norvegicus GN=Ctsb PE=1 SV=2 - [CATB_RAT]	9.14	2	2	2	14	37.4456	5.60498	12.1523	3.83	1	5	15.8512	9.14	2	5	12.3453	9.14	2	4	339
P62074	Mitochondrial import inner membrane translocase subunit Tim10 OS=Rattus norvegicus GN=Timm10 PE=3 SV=1 - [TIM10_RAT]	44.44	1	4	4	14	10.3259	6.29053	11.4401	14.44	1	3	9.72473	23.33	3	4	27.0206	35.56	2	7	90
Q6IFV1	Keratin, type I cytoskeletal 14 OS=Rattus norvegicus GN=Krt14 PE=2 SV=1 - [K1C14_RAT]	7.01	24	2	4	14	52.6509	5.16064	12.4616	3.71	2	6	8.29488	5.15	3	4	5.85244	3.71	2	4	485
F1LSP2	Protein Acad10 OS=Rattus norvegicus GN=Acad10 PE=3 SV=2 - [F1LSP2_RAT]	5.99	2	5	5	14	119.113	8.68994	32.4704	4.21	4	9	7.88728	1.12	1	2	9.54763	2.9	2	3	1069
Q3V5X8	Endonuclease G OS=Rattus norvegicus GN=Endog PE=2 SV=1 - [Q3V5X8_RAT]	19.73	1	5	5	14	32.2478	9.51025	8.78015	15.99	4	4	8.84337	13.95	4	5	13.6149	12.59	3	5	294
P04762	Catalase OS=Rattus norvegicus GN=Cat PE=1 SV=3 - [CATA_RAT]	14.42	1	5	5	13	59.7195	7.50342	15.0466	11.39	4	5	4.01829	5.31	2	2	17.5333	11.95	4	6	527
B2RZ31	Protein Sirt3 OS=Rattus norvegicus GN=Sirt3 PE=2 SV=1 - [B2RZ31_RAT]	20.62	1	4	4	13	28.4788	5.8335	15.8574	16.34	3	5	2.69303	9.73	2	2	15.6472	14.01	3	6	257
D3ZXF9	Protein Mrpl12 OS=Rattus norvegicus GN=Mrpl12 PE=4 SV=1 - [D3ZXF9_RAT]	9.06	1	3	3	13	29.4229	9.65674	6.43055	9.06	2	3	6.85402	8.7	2	3	20.995	5.07	1	7	276
G3V778	Pyruvate dehydrogenase kinase, isoenzyme 4 OS=Rattus norvegicus GN=Pdk4 PE=4 SV=1 - [G3V778_RAT]	11.89	2	3	3	13	46.5796	7.07861	16.7531	11.89	3	7	6.99605	11.89	3	3	8.9861	11.89	3	3	412
P48675	Desmin OS=Rattus norvegicus GN=Des PE=1 SV=2 - [DESM_RAT]	13.65	2	5	6	12	53.424	5.2749	14.0314	7.46	3	5	7.90675	7.25	3	3	5.5308	4.05	2	4	469
Q9QYU2	Elongation factor Ts, mitochondrial OS=Rattus norvegicus GN=Tsfm PE=2 SV=1 - [EFTS_RAT]	20.37	2	3	3	12	35.1559	6.43018	16.3442	20.37	3	4	20.5739	20.37	3	6	9.11895	15.12	2	2	324
Q9EPB1	Dipeptidyl peptidase 2 OS=Rattus norvegicus GN=Dpp7 PE=1 SV=1 - [DPP2_RAT]	7.4	1	3	3	12	55.079	5.04639	15.981	7.4	3	6		0			14.5568	5	2	6	500
P70470	Acyl-protein thioesterase 1 OS=Rattus norvegicus GN=Lypla1 PE=1 SV=1 - [LYPA1_RAT]	25.22	1	4	4	12	24.6923	6.50732	7.5902	8.26	2	3	18.7596	25.22	4	7	5.132	16.09	2	2	230
Q5U3Z3	Isochorismatase domain-containing protein 2, mitochondrial OS=Rattus norvegicus GN=Isoc2 PE=2 SV=1 - [ISOC2_RAT]	13.81	1	1	1	12	23.1423	7.82568	13.8381	13.81	1	4	15.4654	13.81	1	5	10.2348	13.81	1	3	210
F1LPG5	Protein LOC691675 OS=Rattus norvegicus GN=LOC688963 PE=2 SV=1 - [F1LPG5_RAT]	27.91	2	2	2	12	15.055	9.81787	19.2711	19.38	1	5	11.4965	27.91	2	4	6.79754	27.91	2	3	129
F1M964	Mitochondrial-processing peptidase subunit alpha OS=Rattus norvegicus GN=Pmpca PE=2 SV=1 - [F1M964_RAT]	13.98	3	5	5	12	58.2066	7.92822	17.881	12.45	4	7	1.861	1.53	1	2	9.14211	1.92	1	3	522
G3V6R5	Sulfite oxidase OS=Rattus norvegicus GN=Suox PE=4 SV=1 - [G3V6R5_RAT]	8.97	2	4	4	12	60.7678	6.80029	16.7708	5.49	2	5	8.81818	5.13	3	4	5.77525	3.48	2	3	546
Q0D2L2	Protein Mrps22 OS=Rattus norvegicus GN=LOC683519 PE=2 SV=1 - [Q0D2L2_RAT]	16.99	1	4	4	12	41.2094	8.30908	14.0466	16.99	4	5	10.3	6.13	2	4	8.44378	6.13	2	3	359
Q5XIM4	ATP synthase subunit s, mitochondrial OS=Rattus norvegicus GN=Atp5s PE=2 SV=1 - [ATP5S_RAT]	9.5	1	2	2	11	23.309	8.08936	4.63978	9.5	2	3	10.7429	9.5	2	6	4.86995	5.5	1	2	200
O35353	Guanine nucleotide-binding protein subunit beta-4 OS=Rattus norvegicus GN=Gnb4 PE=2 SV=4 - [GBB4_RAT]	6.18	3	1	2	11	37.339	6.16357	2.74848	6.18	2	3	1.72104	2.94	1	1	11.6439	6.18	2	7	340
Q4QQW3	Hydroxyacid-oxoacid transhydrogenase, mitochondrial OS=Rattus norvegicus GN=Adhfe1 PE=1 SV=1 - [HOT_RAT]	12.63	1	4	4	11	50.1935	7.54736	15.8715	12.63	4	6	7.77101	2.78	1	3	4.79998	2.78	1	2	467
Q6P7S1	Acid ceramidase OS=Rattus norvegicus GN=Asah1 PE=2 SV=1 - [ASAH1_RAT]	14.97	1	4	4	11	44.4148	8.30908	16.0285	8.38	2	5	9.25202	10.91	3	5	3.35835	4.31	1	1	394
Q5PPN7	Coiled-coil domain-containing protein 51 OS=Rattus norvegicus GN=Ccdc51 PE=2 SV=2 - [CCD51_RAT]	10.73	1	3	3	11	45.7846	8.08936	8.12816	5.61	2	3	4.91808	2.93	1	2	18.6292	10.73	3	6	410
B0BN52	Mitochondrial carrier homolog 2 (C. elegans) OS=Rattus norvegicus GN=Mtch2 PE=2 SV=1 - [B0BN52_RAT]	5.28	1	1	1	11	33.506	8.25049	17.038	5.28	1	6	6.56126	5.28	1	3	5.08578	5.28	1	2	303
P52287	Guanine nucleotide-binding protein G(I)/G(S)/G(T) subunit beta-3 OS=Rattus norvegicus GN=Gnb3 PE=1 SV=1 - [GBB3_RAT]	6.18	1	1	2	10	37.1559	5.8335	0	2.94	1	2	4.40983	6.18	2	2	9.22241	2.94	1	6	340
P23928	Alpha-crystallin B chain OS=Rattus norvegicus GN=Cryab PE=1 SV=1 - [CRYAB_RAT]	18.29	1	3	3	10	20.0763	7.32764	14.8198	13.71	2	5	3.17392	7.43	1	1	10.827	18.29	3	4	175
P62161	Calmodulin OS=Rattus norvegicus GN=Calm1 PE=1 SV=2 - [CALM_RAT]	10.74	2	2	2	10	16.8268	4.22119	6.32483	10.74	2	2	25.6943	10.74	2	8		0			149
Q3MIE0	Enoyl-CoA hydratase domain-containing protein 3, mitochondrial OS=Rattus norvegicus GN=Echdc3 PE=2 SV=1 - [ECHD3_RAT]	12.67	2	3	3	10	32.3649	8.57275	7.5518	8.33	2	3	10.1835	12.67	3	4	7.69622	8.67	2	3	300
O88989	Malate dehydrogenase, cytoplasmic OS=Rattus norvegicus GN=Mdh1 PE=1 SV=3 - [MDHC_RAT]	13.17	1	4	4	10	36.46	6.58057	6.31798	6.29	2	3	3.49535	6.59	2	3	6.06501	13.17	4	4	334
D4AB01	Histidine triad nucleotide binding protein 2 (Predicted), isoform CRA_a OS=Rattus norvegicus GN=Hint2 PE=4 SV=1 - [D4AB01_RAT]	21.47	1	2	2	10	17.3693	9.42236	18.6605	21.47	2	6	6.45452	12.27	1	2	6.22208	21.47	2	2	163
G3V8V6	O-acetyl-ADP-ribose deacetylase MACROD1 OS=Rattus norvegicus GN=Macrod1 PE=4 SV=2 - [G3V8V6_RAT]	13.64	2	2	2	10	27.1243	9.02686	6.9625	9.5	1	3	8.21935	13.64	2	4	7.15674	13.64	2	3	242
P11598	Protein disulfide-isomerase A3 OS=Rattus norvegicus GN=Pdia3 PE=1 SV=2 - [PDIA3_RAT]	10.5	1	5	5	9	56.5877	6.21436	8.0281	8.51	4	4	6.899	6.34	3	3	5.48504	4.36	2	2	505
Q6AYZ1	Tubulin alpha-1C chain OS=Rattus norvegicus GN=Tuba1c PE=1 SV=1 - [TBA1C_RAT]	16.26	7	5	5	9	49.9055	5.09717	22.1359	16.26	5	7		0			4.82948	5.35	2	2	449
Q9WV97	Mitochondrial import inner membrane translocase subunit Tim9 OS=Rattus norvegicus GN=Timm9 PE=1 SV=3 - [TIM9_RAT]	16.85	1	1	1	9	10.3691	7.21045	8.15871	16.85	1	3	5.9749	16.85	1	3	8.83225	16.85	1	3	89
Q4FZT0	Stomatin-like protein 2, mitochondrial OS=Rattus norvegicus GN=Stoml2 PE=1 SV=1 - [STML2_RAT]	21.81	1	5	5	9	38.3902	8.63135	5.52634	9.07	2	2	4.46135	2.83	1	2	17.3058	18.98	4	5	353
Q66H98	Serum deprivation-response protein OS=Rattus norvegicus GN=Sdpr PE=1 SV=3 - [SDPR_RAT]	4.8	1	2	2	9	46.3583	5.2876	5.57354	2.16	1	3	1.76918	2.16	1	1	10.5479	4.8	2	5	417
Q91ZW6	Trimethyllysine dioxygenase, mitochondrial OS=Rattus norvegicus GN=Tmlhe PE=1 SV=2 - [TMLH_RAT]	11.16	2	3	3	9	49.5361	8.41162	9.99574	7.36	2	4	13.2701	11.16	3	4	2.55516	3.33	1	1	421
B0LPN4-2	Isoform 2 of Ryanodine receptor 2 OS=Rattus norvegicus GN=Ryr2 - [RYR2_RAT]	1.56	4	6	6	9	561.98	6.0874	9.50553	1.09	4	4	3.90015	0.71	3	3	4.05901	0.44	2	2	4947
D3ZJS3	Protein Tomm6 OS=Rattus norvegicus GN=Tomm6 PE=4 SV=1 - [D3ZJS3_RAT]	18.92	1	1	1	9	7.88896	4.89404	5.87956	18.92	1	2		0			21.7006	18.92	1	7	74
D4ADD7	Glutaredoxin 5 homolog (S. cerevisiae) (Predicted), isoform CRA_b OS=Rattus norvegicus GN=Glrx5 PE=4 SV=1 - [D4ADD7_RAT]	9.21	1	1	1	9	16.4215	7.28369	9.95485	9.21	1	3	10.2582	9.21	1	3	11.75	9.21	1	3	152
P19944	60S acidic ribosomal protein P1 OS=Rattus norvegicus GN=Rplp1 PE=3 SV=1 - [RLA1_RAT]	14.04	1	1	1	8	11.4907	4.32275	2.31149	14.04	1	1	15.0812	14.04	1	4	10.2985	14.04	1	3	114
Q6AYQ8	Acylpyruvase FAHD1, mitochondrial OS=Rattus norvegicus GN=Fahd1 PE=2 SV=1 - [FAHD1_RAT]	13.57	1	2	2	8	24.4646	7.73779	9.38741	13.57	2	3	9.69703	7.24	1	3	5.74036	13.57	2	2	221
Q505J9	ATPase family AAA domain-containing protein 1 OS=Rattus norvegicus GN=Atad1 PE=1 SV=1 - [ATAD1_RAT]	8.86	1	2	2	8	40.691	6.90283	11.1318	8.86	2	4	5.24536	3.32	1	2	6.2511	8.86	2	2	361
D3ZT90	Glutaryl-Coenzyme A dehydrogenase (Predicted) OS=Rattus norvegicus GN=Gcdh PE=3 SV=1 - [D3ZT90_RAT]	10.29	1	3	3	8	49.6815	8.71924	12.5722	7.16	2	4	5.6351	3.13	1	2	6.32353	3.13	1	2	447
D4A264	Protein Zadh2 OS=Rattus norvegicus GN=Zadh2 PE=4 SV=2 - [D4A264_RAT]	15.38	1	3	3	8	40.5101	7.76709	10.1079	7.69	2	3	7.85518	3.98	1	2	9.58498	11.67	2	3	377
D4A7Z5	Protein LOC100360940 OS=Rattus norvegicus GN=LOC100360940 PE=4 SV=1 - [D4A7Z5_RAT]	4.24	2	1	1	8	26.7905	5.49072	8.88706	4.24	1	4	3.03861	4.24	1	1	7.61335	4.24	1	3	236
D4ACB3	Protein RGD1559672 OS=Rattus norvegicus GN=RGD1559672 PE=4 SV=1 - [D4ACB3_RAT]	22.49	3	2	3	8	21.9701	8.6167	12.9272	22.49	3	4	7.67565	8.13	1	2	8.18821	8.13	1	2	209
G3V640	Mitochondrial import inner membrane translocase subunit TIM44 OS=Rattus norvegicus GN=Timm44 PE=4 SV=1 - [G3V640_RAT]	9.93	2	4	4	8	51.0284	8.30908	10.7757	7.95	3	4		0			9.42486	4.42	2	4	453
G3V6R7	3-oxoacyl-[acyl-carrier-protein] synthase, mitochondrial OS=Rattus norvegicus GN=Oxsm PE=3 SV=1 - [G3V6R7_RAT]	14.69	1	4	4	8	47.9742	7.34229	4.82842	5.48	2	2	11.5513	14.69	4	4	5.76876	2.85	1	2	456
G3V7K6	Single-stranded DNA-binding protein OS=Rattus norvegicus GN=Ssbp1 PE=3 SV=1 - [G3V7K6_RAT]	22.3	2	2	2	8	17.1599	9.83252	13.1638	22.3	2	4		0			17.0091	22.3	2	4	148
P38718-2	Isoform Short of Mitochondrial pyruvate carrier 2 OS=Rattus norvegicus GN=Mpc2 - [MPC2_RAT]	26.72	2	4	4	8	12.9599	10.77	2.36656	9.48	1	1	15.5476	23.28	3	7		0			116
Q5XIM0	BCS1-like (Yeast) OS=Rattus norvegicus GN=Bcs1l PE=2 SV=1 - [Q5XIM0_RAT]	19.62	1	5	5	8	47.3633	8.23584	16.4586	17.22	4	5	7.9204	13.16	3	3		0			418
Q9Z0J5-2	Isoform 2 of Thioredoxin reductase 2, mitochondrial OS=Rattus norvegicus GN=Txnrd2 - [TRXR2_RAT]	18.74	3	6	6	8	53.206	7.7085	13.6829	15.68	5	6	1.69868	3.05	1	1	1.83737	2.24	1	1	491
Q63707	Dihydroorotate dehydrogenase (quinone), mitochondrial OS=Rattus norvegicus GN=Dhodh PE=1 SV=1 - [PYRD_RAT]	7.09	1	2	2	7	42.6369	9.45166	2.55433	7.09	2	2	1.61625	2.53	1	3	0	2.53	1	2	395
P00564	Creatine kinase M-type OS=Rattus norvegicus GN=Ckm PE=1 SV=2 - [KCRM_RAT]	9.97	1	3	3	7	43.0178	7.06396	6.64234	2.62	1	3	5.04297	6.3	2	2	4.59559	6.3	2	2	381
P97615	Thioredoxin, mitochondrial OS=Rattus norvegicus GN=Txn2 PE=2 SV=1 - [THIOM_RAT]	9.64	1	2	2	7	18.2205	7.89893	11.6452	9.64	2	3	8.73726	9.04	1	2	9.14162	9.04	1	2	166
Q5U2X7	Mitochondrial import inner membrane translocase subunit Tim21 OS=Rattus norvegicus GN=Timm21 PE=2 SV=1 - [TIM21_RAT]	9.8	2	2	2	7	27.8587	9.99365	5.50558	9.8	2	2	3.89813	4.08	1	3	4.26587	4.08	1	2	245
Q9WVJ4	Synaptojanin-2-binding protein OS=Rattus norvegicus GN=Synj2bp PE=1 SV=2 - [SYJ2B_RAT]	25.52	1	3	3	7	15.8153	6.80029	3.08533	7.59	1	1	2.15324	7.59	1	1	14.0478	17.93	2	5	145
D3ZN43	NADH dehydrogenase (ubiquinone) complex I, assembly factor 6 OS=Rattus norvegicus GN=Ndufaf6 PE=3 SV=1 - [NDUF6_RAT]	9.91	1	2	2	7	38.4911	9.62744	16.455	9.91	2	6	3.77255	6.01	1	1		0			333
Q9JKW1	Mitochondrial import inner membrane translocase subunit Tim22 OS=Rattus norvegicus GN=Timm22 PE=2 SV=2 - [TIM22_RAT]	22.92	1	2	2	7	19.9049	8.23584	5.08703	7.81	1	2	9.43652	22.92	2	4	2.43612	15.1	1	1	192
P22062	Protein-L-isoaspartate(D-aspartate) O-methyltransferase OS=Rattus norvegicus GN=Pcmt1 PE=1 SV=2 - [PIMT_RAT]	14.54	1	2	2	7	24.6257	7.6792	10.7814	14.54	2	3	0	6.17	1	2	5.45291	6.17	1	2	227
B0BMT9	Protein Sqrdl OS=Rattus norvegicus GN=Sqrdl PE=2 SV=1 - [B0BMT9_RAT]	8.44	1	3	3	7	50.1698	9.0708	9.89024	5.33	2	4	1.64504	2.22	1	1	3.2968	5.33	2	2	450
D3ZFR9	Protein Rdh13 OS=Rattus norvegicus GN=Rdh13 PE=3 SV=1 - [D3ZFR9_RAT]	3.89	1	1	1	7	36.385	8.86572	10.6356	3.89	1	4	5.9093	3.89	1	2	3.3577	3.89	1	1	334
D3ZGY4	Glyceraldehyde-3-phosphate dehydrogenase OS=Rattus norvegicus GN=RGD1560797 PE=3 SV=1 - [D3ZGY4_RAT]	11.71	10	2	2	7	35.8001	7.76709	20.0706	11.71	2	5	2.61137	4.5	1	1	3.15044	4.5	1	1	333
D4A520	Protein Pptc7 OS=Rattus norvegicus GN=Pptc7 PE=4 SV=1 - [D4A520_RAT]	17.59	1	4	4	7	32.8262	5.2749	8.18454	9.77	2	3	2.91578	4.89	1	1	6.04566	12.7	3	3	307
F7EZZ0	Disks large-associated protein 3 OS=Rattus norvegicus GN=Dap3 PE=4 SV=1 - [F7EZZ0_RAT]	6.31	1	2	2	7	45.0834	9.1001	9.64799	6.31	2	4	4.01865	3.54	1	2	2.00015	3.54	1	1	396
P84817-3	Isoform 3 of Mitochondrial fission 1 protein OS=Rattus norvegicus GN=Fis1 - [FIS1_RAT]	16.55	3	2	2	7	16.2405	9.24658	7.00292	8.97	1	2	9.54	16.55	2	3	4.9098	16.55	2	2	145
P04785	Protein disulfide-isomerase OS=Rattus norvegicus GN=P4hb PE=1 SV=2 - [PDIA1_RAT]	13.75	1	4	4	6	56.9157	4.93213	2.45581	2.36	1	1	2.79327	5.89	1	1	10.517	7.86	3	4	509
Q9Z1N4	3'(2'),5'-bisphosphate nucleotidase 1 OS=Rattus norvegicus GN=Bpnt1 PE=1 SV=1 - [BPNT1_RAT]	7.79	1	2	2	6	33.1531	5.87158	8.589	7.79	2	3	0	4.22	1	1	5.06272	4.22	1	2	308
P35571	Glycerol-3-phosphate dehydrogenase, mitochondrial OS=Rattus norvegicus GN=Gpd2 PE=1 SV=1 - [GPDM_RAT]	8.39	2	4	4	6	80.9213	6.62451	8.10148	6.05	3	3		0			4.10732	4.4	2	3	727
P26644	Beta-2-glycoprotein 1 OS=Rattus norvegicus GN=Apoh PE=2 SV=2 - [APOH_RAT]	3.37	2	2	2	6	33.1751	8.22119		0			8.42083	3.03	1	4	4.21506	3.37	2	2	297
Q6PCT8	Succinate dehydrogenase [ubiquinone] cytochrome b small subunit, mitochondrial OS=Rattus norvegicus GN=Sdhd PE=2 SV=1 - [DHSD_RAT]	6.29	1	1	1	6	16.9649	9.29053	5.79155	6.29	1	3	3.88332	6.29	1	2	1.96365	6.29	1	1	159
Q642A4	UPF0598 protein C8orf82 homolog OS=Rattus norvegicus PE=2 SV=1 - [CH082_RAT]	13.3	1	2	2	6	24.3813	8.5874		0			8.12888	13.3	2	3	7.48383	5.5	1	3	218
D3ZCI0	Glycerol kinase OS=Rattus norvegicus GN=Gk PE=3 SV=2 - [D3ZCI0_RAT]	9.73	4	4	4	6	57.4261	5.65576	4.53782	7.25	3	3		0			7.05829	7.44	3	3	524
D3ZEH6	Protein Nudt8 OS=Rattus norvegicus GN=Nudt8 PE=4 SV=1 - [D3ZEH6_RAT]	14.29	1	2	2	6	23.0781	6.93213	4.75686	8.57	1	2	5.38954	14.29	2	2	4.41162	5.71	1	2	210
D3ZIL6	Enoyl Coenzyme A hydratase domain containing 2 (Predicted), isoform CRA_a OS=Rattus norvegicus GN=Echdc2 PE=3 SV=1 - [D3ZIL6_RAT]	5.74	1	1	1	6	31.7588	9.33447	4.49935	5.74	1	2	5.95426	5.74	1	2	5.76525	5.74	1	2	296
D4A0Y4	Oxidoreductase NAD-binding domain containing 1 (Predicted), isoform CRA_b OS=Rattus norvegicus GN=Oxnad1 PE=4 SV=1 - [D4A0Y4_RAT]	14.37	1	3	3	6	37.4034	8.96826	5.72358	8.68	2	3	2.21965	5.69	1	1	5.03197	9.28	2	2	334
D4ABR6	Annexin (Fragment) OS=Rattus norvegicus GN=Anxa6 PE=2 SV=2 - [D4ABR6_RAT]	6.26	2	3	3	6	75.5565	5.68115	1.76232	1.64	1	1	3.33457	2.38	1	1	12.2378	4.62	2	4	671
F1LVY9	Protein Pdf OS=Rattus norvegicus GN=Pdf PE=3 SV=2 - [F1LVY9_RAT]	12.99	1	3	3	6	25.8626	9.26123	7.30196	9.52	2	3	0	3.46	1	1	4.65192	9.52	2	2	231
F1LWG4	NADH dehydrogenase (Ubiquinone) 1 alpha subcomplex, assembly factor 1 (Predicted), isoform CRA_a OS=Rattus norvegicus GN=Ndufaf1 PE=4 SV=2 - [F1LWG4_RAT]	8.23	1	3	3	6	37.7581	8.104		0			5.65605	4.88	2	3	5.67465	5.79	2	3	328
G3V7L0	Adrenodoxin, mitochondrial OS=Rattus norvegicus GN=Fdx1 PE=4 SV=1 - [G3V7L0_RAT]	11.17	2	2	2	6	20.136	5.88428		0				0			6.50493	11.17	2	6	188
P02650	Apolipoprotein E OS=Rattus norvegicus GN=Apoe PE=1 SV=2 - [APOE_RAT]	8.01	1	2	2	5	35.7313	5.2749	7.89051	8.01	2	3	2.31851	4.17	1	1	2.92467	4.17	1	1	312
Q63750	39S ribosomal protein L23, mitochondrial OS=Rattus norvegicus GN=Mrpl23 PE=2 SV=1 - [RM23_RAT]	10.27	1	1	1	5	17.0398	9.5835	9.30806	10.27	1	3	4.1709	10.27	1	1	4.0034	10.27	1	1	146
P35281	Ras-related protein Rab-10 OS=Rattus norvegicus GN=Rab10 PE=1 SV=1 - [RAB10_RAT]	11	30	2	2	5	22.8438	8.96826	4.76429	5.5	1	2		0			7.52419	11	2	3	200
P07340	Sodium/potassium-transporting ATPase subunit beta-1 OS=Rattus norvegicus GN=Atp1b1 PE=1 SV=1 - [AT1B1_RAT]	3.62	1	1	1	5	35.179	8.646	11.3186	3.62	1	5		0				0			304
P05545	Serine protease inhibitor A3K OS=Rattus norvegicus GN=Serpina3k PE=1 SV=3 - [SPA3K_RAT]	8.89	4	3	3	5	46.5321	5.43994	8.078	8.89	3	3		0			5.25779	3.13	1	2	416
P19804	Nucleoside diphosphate kinase B OS=Rattus norvegicus GN=Nme2 PE=1 SV=1 - [NDKB_RAT]	20.39	2	2	2	5	17.2719	7.44482	5.60436	20.39	2	2		0			2.44517	20.39	2	3	152
P18418	Calreticulin OS=Rattus norvegicus GN=Calr PE=1 SV=1 - [CALR_RAT]	11.78	1	3	3	5	47.9658	4.48779	2.04796	2.88	1	1		0			7.59182	11.78	3	4	416
P0CG51	Polyubiquitin-B OS=Rattus norvegicus GN=Ubb PE=1 SV=1 - [UBB_RAT]	20.98	6	1	1	5	34.3475	7.53271	4.07268	20.98	1	1	7.16527	20.98	1	2	6.67064	20.98	1	2	305
P52873	Pyruvate carboxylase, mitochondrial OS=Rattus norvegicus GN=Pc PE=1 SV=2 - [PYC_RAT]	5.77	1	5	5	5	129.695	6.81494	4.4729	2.89	3	3	2.32769	1.87	1	1	2.52573	1.02	1	1	1178
Q5XIG4	OCIA domain-containing protein 1 OS=Rattus norvegicus GN=Ociad1 PE=1 SV=1 - [OCAD1_RAT]	11.74	1	2	2	5	27.6418	7.41553	4.81297	11.74	2	2		0			6.38138	11.74	2	3	247
Q68FX9	NAD-dependent protein deacylase sirtuin-5, mitochondrial OS=Rattus norvegicus GN=Sirt5 PE=2 SV=1 - [SIR5_RAT]	9.03	1	2	2	5	34.0763	8.74854	10.8038	9.03	2	4		0			2.38951	3.55	1	1	310
Q5XIC2	Evolutionarily conserved signaling intermediate in Toll pathway, mitochondrial OS=Rattus norvegicus GN=Ecsit PE=1 SV=1 - [ECSIT_RAT]	8.99	1	3	3	5	49.5881	6.43018	3.19975	6.68	2	2	1.77557	2.3	1	2	1.91679	2.3	1	1	434
Q1HCL7	NAD kinase 2, mitochondrial OS=Rattus norvegicus GN=Nadk2 PE=2 SV=1 - [NAKD2_RAT]	8.71	1	3	3	5	48.0866	6.94678	9.17875	3.29	1	3	0	3.06	1	1	2.68366	2.35	1	1	425
B0BNM1	NAD(P)H-hydrate epimerase OS=Rattus norvegicus GN=Apoa1bp PE=2 SV=1 - [NNRE_RAT]	10.64	1	2	2	5	30.8707	6.88818	12.365	10.64	2	4	2.66712	6.38	1	1		0			282
P0C546	Mitochondrial coenzyme A transporter SLC25A42 OS=Rattus norvegicus GN=Slc25a42 PE=2 SV=1 - [S2542_RAT]	10.38	1	2	2	5	35.0775	9.86182	13.1593	5.35	1	3	6.3971	10.38	2	2		0			318
D3ZYW7	Frataxin, mitochondrial OS=Rattus norvegicus GN=Fxn PE=1 SV=1 - [FRDA_RAT]	11.06	2	2	2	5	23.0518	8.55811	5.25203	11.06	2	2		0			10.4233	5.77	1	3	208
B0BNJ4	Ethylmalonic encephalopathy 1 OS=Rattus norvegicus GN=Ethe1 PE=2 SV=1 - [B0BNJ4_RAT]	7.87	1	1	1	5	27.659	7.06396	2.48238	7.87	1	1	4.71325	7.87	1	3	2.78795	7.87	1	1	254
D3Z9L0	Protein Agk OS=Rattus norvegicus GN=Agk PE=4 SV=1 - [D3Z9L0_RAT]	5.94	1	1	1	5	46.7391	8.25049	11.8338	5.94	1	4	2.4121	5.94	1	1		0			421
D3ZGM1	Protein Ptcd3 OS=Rattus norvegicus GN=Ptcd3 PE=2 SV=1 - [D3ZGM1_RAT]	8.88	1	4	4	5	77.8418	6.20166	3.53672	2.33	1	1	2.38846	4.22	2	2	6.84211	2.33	1	2	687
D3ZQB6	Cat eye syndrome chromosome region, candidate 5 homolog (Human) (Predicted) OS=Rattus norvegicus GN=Cecr5 PE=4 SV=1 - [D3ZQB6_RAT]	6.44	1	2	2	5	46.4469	7.37158	6.88871	6.44	2	3	1.90971	3.34	1	1	2.5018	3.34	1	1	419
D3ZTW7	ATP synthase mitochondrial F1 complex assembly factor 2 (Predicted), isoform CRA_c OS=Rattus norvegicus GN=Atpaf2 PE=4 SV=1 - [D3ZTW7_RAT]	9.4	1	2	2	5	34.1706	6.55127	5.43655	9.4	2	2	6.10909	9.4	2	2	2.66338	5.37	1	1	298
D4ADG2	Protein Iba57 OS=Rattus norvegicus GN=Iba57 PE=3 SV=1 - [D4ADG2_RAT]	13.13	2	4	4	5	38.6491	9.12939	2.5653	3.63	1	1	4.67431	9.5	3	3	0	2.51	1	1	358
F1LP60	Moesin (Fragment) OS=Rattus norvegicus GN=Msn PE=2 SV=1 - [F1LP60_RAT]	8.51	4	4	4	5	67.6098	6.46826	6.08479	4.69	2	3	0	1.74	1	1	2.54063	2.08	1	1	576
G3V616	Divalent cation tolerant protein CUTA, isoform CRA_b OS=Rattus norvegicus GN=Cuta PE=4 SV=1 - [G3V616_RAT]	7.91	2	1	1	5	18.7459	7.34229	4.66905	7.91	1	2	5.66226	7.91	1	2	2.9551	7.91	1	1	177
Q5U3Z7	Serine hydroxymethyltransferase OS=Rattus norvegicus GN=Shmt2 PE=2 SV=1 - [Q5U3Z7_RAT]	8.93	2	4	4	5	55.7296	8.20654	1.99299	4.96	2	2	2.55938	3.97	2	3		0			504
Q642E6	Tripeptidyl peptidase I OS=Rattus norvegicus GN=Tpp1 PE=2 SV=1 - [Q642E6_RAT]	3.73	2	1	1	5	61.2748	6.63916	13.0099	3.73	1	4	3.45857	3.73	1	1		0			563
Q66HD0-2	Isoform 2 of Endoplasmin OS=Rattus norvegicus GN=Hsp90b1 - [ENPL_RAT]	3.27	2	2	2	5	74.1616	5.10986	6.79681	3.27	2	4		0			2.74602	1.87	1	1	643
Q7TP77	Aa2-277 OS=Rattus norvegicus GN=Mrpl49 PE=2 SV=1 - [Q7TP77_RAT]	15.66	1	2	2	5	19.3941	9.34912	9.43831	15.66	2	3	6.09333	15.66	2	2		0			166
Q8R3Z7	EH-domain containing 4 OS=Rattus norvegicus GN=Ehd4 PE=2 SV=1 - [Q8R3Z7_RAT]	4.62	1	2	2	5	61.4285	6.75635	7.21108	2.77	1	3	4.54316	4.62	2	2		0			541
P63031	Mitochondrial pyruvate carrier 1 OS=Rattus norvegicus GN=Mpc1 PE=2 SV=1 - [MPC1_RAT]	23.85	1	1	1	4	12.4463	9.61279	12.2332	23.85	1	4		0				0			109
P57093	Phytanoyl-CoA dioxygenase, peroxisomal OS=Rattus norvegicus GN=Phyh PE=1 SV=2 - [PAHX_RAT]	3.55	1	1	1	4	38.5635	8.48486	3.27899	3.55	1	1	3.33218	3.55	1	1	5.25671	3.55	1	2	338
P62804	Histone H4 OS=Rattus norvegicus GN=Hist1h4b PE=1 SV=2 - [H4_RAT]	9.71	1	1	1	4	11.3604	11.356	4.44758	9.71	1	2		0			4.58178	9.71	1	2	103
Q66H12	Alpha-N-acetylgalactosaminidase OS=Rattus norvegicus GN=Naga PE=2 SV=1 - [NAGAB_RAT]	6.75	1	2	2	4	46.8405	5.85889	4.80013	4.1	1	1		0			6.17112	6.75	2	3	415
Q63081	Protein disulfide-isomerase A6 OS=Rattus norvegicus GN=Pdia6 PE=1 SV=2 - [PDIA6_RAT]	10.45	1	3	3	4	48.1433	5.13525	8.47908	10.45	3	3		0			2.32784	3.41	1	1	440
Q5U2U0	ATP-dependent Clp protease ATP-binding subunit clpX-like, mitochondrial OS=Rattus norvegicus GN=Clpx PE=2 SV=1 - [CLPX_RAT]	5.69	1	3	3	4	69.1647	7.72314	2.3775	1.58	1	1	4.14005	3.63	2	2	2.43441	2.05	1	1	633
Q5XII0	Mammalian ependymin-related protein 1 OS=Rattus norvegicus GN=Epdr1 PE=2 SV=1 - [EPDR1_RAT]	4.91	1	1	1	4	25.6229	7.57666		0			0	4.91	1	2	4.37723	4.91	1	2	224
Q3KRE0	ATPase family AAA domain-containing protein 3 OS=Rattus norvegicus GN=Atad3 PE=1 SV=1 - [ATAD3_RAT]	6.6	1	4	4	4	66.7175	9.29053	2.3909	1.35	1	1	4.07188	3.38	2	2	1.94382	1.86	1	1	591
Q32PX9	Lactation elevated protein 1 OS=Rattus norvegicus GN=Lace1 PE=2 SV=1 - [LACE1_RAT]	5	2	2	2	4	54.468	8.42627	4.86924	5	2	2		0			5.4581	2.5	1	2	480
B2RYT9	Translational activator of cytochrome c oxidase 1 OS=Rattus norvegicus GN=Taco1 PE=2 SV=1 - [TACO1_RAT]	10.85	2	2	2	4	32.7337	7.92822	8.84319	6.1	1	3		0			2.78771	4.75	1	1	295
D3Z9I1	Protein Coa3 OS=Rattus norvegicus GN=Coa3 PE=4 SV=1 - [D3Z9I1_RAT]	9.26	1	1	1	4	11.9212	9.59814	4.57981	9.26	1	2	3.22256	9.26	1	1	3.55263	9.26	1	1	108
D3ZBM3	Ferrochelatase OS=Rattus norvegicus GN=Fech PE=3 SV=1 - [D3ZBM3_RAT]	6.64	1	2	2	4	47.5213	8.71924	11.6371	6.64	2	4		0				0			422
D3ZYY0	Protein Sdr39u1 OS=Rattus norvegicus GN=Sdr39u1 PE=4 SV=1 - [D3ZYY0_RAT]	9.06	1	2	2	4	31.9238	8.04541	9.33722	6.04	1	3	1.64763	3.02	1	1		0			298
D4A104	Mitochondrial ribosomal protein L45 (Predicted) OS=Rattus norvegicus GN=Mrpl45 PE=4 SV=1 - [D4A104_RAT]	8.17	1	2	2	4	35.4174	9.40771	5.88073	5.23	1	2	2.05276	2.94	1	1	0	2.94	1	1	306
D4A4W6	Protein Slirp OS=Rattus norvegicus GN=Slirp PE=4 SV=1 - [D4A4W6_RAT]	23.42	1	3	3	4	12.5684	7.6499		0			1.97415	9.91	1	1	6.43416	23.42	3	3	111
D4A678	Protein Spta1 OS=Rattus norvegicus GN=Spta1 PE=2 SV=2 - [D4A678_RAT]	1.78	2	3	3	4	279.917	5.04639	6.51567	1.41	2	2	0	0.37	1	2		0			2416
D4ABM5	Mitochondrial ribosomal protein S34 (Predicted), isoform CRA_a OS=Rattus norvegicus GN=Mrps34 PE=4 SV=1 - [D4ABM5_RAT]	6.42	1	1	1	4	25.7837	10.272	9.74355	6.42	1	3		0			2.82112	6.42	1	1	218
G3V8C3	Vimentin OS=Rattus norvegicus GN=Vim PE=3 SV=1 - [G3V8C3_RAT]	6.22	2	2	3	4	53.6681	5.12256	2.38387	2.15	1	1	2.10121	2.15	1	1	3.00328	4.08	2	2	466
M0RAS8	Elongation factor 1-alpha (Fragment) OS=Rattus norvegicus PE=3 SV=1 - [M0RAS8_RAT]	4.73	7	2	2	4	43.7443	6.65381	3.72084	2.74	1	2	1.60115	4.73	2	2		0			402
M0RDY2	Protein Fam185a OS=Rattus norvegicus GN=Fam185a PE=4 SV=1 - [M0RDY2_RAT]	22.86	1	3	3	4	18.3383	6.75635	2.51995	8	1	1		0			6.04304	14.86	2	3	175
Q3B8N9	Biphenyl hydrolase-like (Serine hydrolase) OS=Rattus norvegicus GN=Bphl PE=2 SV=1 - [Q3B8N9_RAT]	8.59	1	2	2	4	32.8021	8.79248	6.86446	4.81	1	2	2.25109	3.78	1	1	2.94874	4.81	1	1	291
Q4G067	Mitochondrial ribosomal protein L44 OS=Rattus norvegicus GN=Mrpl44 PE=2 SV=1 - [Q4G067_RAT]	12.65	1	3	3	4	37.4167	8.82178	5.18498	5.72	1	1		0			5.5654	12.65	3	3	332
Q7TPJ4	Ac2-202 OS=Rattus norvegicus GN=Ldhd PE=2 SV=1 - [Q7TPJ4_RAT]	4.39	1	2	2	4	54.2579	6.18896		0			2.04697	4.39	2	2	3.83103	2.79	1	2	501
Q99P39-2	Isoform Cytoplasmic of Cysteine desulfurase, mitochondrial OS=Rattus norvegicus GN=Nfs1 - [NFS1_RAT]	5.79	3	2	2	4	44.0416	7.75244	2.52127	3.53	1	1	1.67394	2.27	1	1	4.82233	3.53	1	2	397
P11232	Thioredoxin OS=Rattus norvegicus GN=Txn PE=1 SV=2 - [THIO_RAT]	12.38	1	1	1	3	11.6657	4.91943	9.86933	12.38	1	3		0				0			105
O88767	Protein DJ-1 OS=Rattus norvegicus GN=Park7 PE=1 SV=1 - [PARK7_RAT]	19.05	2	2	2	3	19.9614	6.771	2.09267	4.76	1	1	2.09479	14.29	1	1	0	4.76	1	1	189
P16303	Carboxylesterase 1D OS=Rattus norvegicus GN=Ces1d PE=1 SV=2 - [CES1D_RAT]	4.6	2	2	2	3	62.1077	6.53662		0			4.59712	4.6	2	3		0			565
Q5M9I5	Cytochrome b-c1 complex subunit 6, mitochondrial OS=Rattus norvegicus GN=Uqcrh PE=3 SV=1 - [QCR6_RAT]	16.85	1	1	1	3	10.417	4.97021	3.1031	16.85	1	1		0			7.30233	16.85	1	2	89
P70712	Kynureninase OS=Rattus norvegicus GN=Kynu PE=1 SV=2 - [KYNU_RAT]	1.51	1	1	1	3	52.4362	6.65381		0			5.16133	1.51	1	3		0			464
Q5PQQ1	tRNA modification GTPase GTPBP3, mitochondrial OS=Rattus norvegicus GN=Gtpbp3 PE=2 SV=1 - [GTPB3_RAT]	4.27	1	1	1	3	51.9851	6.82959	3.4923	4.27	1	1	2.63101	4.27	1	1	2.51963	4.27	1	1	492
P24368	Peptidyl-prolyl cis-trans isomerase B OS=Rattus norvegicus GN=Ppib PE=2 SV=3 - [PPIB_RAT]	15.28	1	3	3	3	23.7875	9.49561	4.9355	11.11	2	2	0	4.17	1	1		0			216
P84850	D-2-hydroxyglutarate dehydrogenase, mitochondrial OS=Rattus norvegicus GN=D2hgdh PE=3 SV=1 - [D2HDH_RAT]	5.23	1	2	2	3	58.7674	8.1333	6.79933	2.99	1	2	1.98816	2.24	1	1		0			535
B5DFN3	Mitochondrial nucleoid factor 1 OS=Rattus norvegicus GN=Mnf1 PE=2 SV=1 - [MNF1_RAT]	9.56	2	1	1	3	16.3203	9.23193	2.84466	9.56	1	1	1.82041	9.56	1	1	2.10371	9.56	1	1	136
B1WBY5	DnaJ (Hsp40) homolog, subfamily C, member 11 OS=Rattus norvegicus GN=Dnajc11 PE=2 SV=1 - [B1WBY5_RAT]	6.08	1	2	2	3	63.1658	8.32373	4.81032	6.08	2	2	2.34838	2.5	1	1		0			559
B2RYU0	NADH dehydrogenase (Ubiquinone) 1 beta subcomplex, 2 (Predicted), isoform CRA_b OS=Rattus norvegicus GN=Ndufb2 PE=4 SV=1 - [B2RYU0_RAT]	18.1	1	1	1	3	11.8349	6.3667	8.4013	18.1	1	2		0			2.90847	18.1	1	1	105
B5DEP4	Mitochondrial ribosomal protein L42 OS=Rattus norvegicus GN=Mrpl42 PE=2 SV=1 - [B5DEP4_RAT]	7.09	3	1	1	3	16.5535	9.53955		0			2.08209	7.09	1	2	2.36008	7.09	1	1	141
D3ZCA0	Proline synthetase co-transcribed (Predicted) OS=Rattus norvegicus GN=Prosc PE=3 SV=1 - [D3ZCA0_RAT]	10.55	1	2	2	3	30.0856	7.92822	6.86313	5.82	1	2	3.303	4.73	1	1		0			275
D3ZIN7	Mitochondrial ribosomal protein S23 (Predicted), isoform CRA_b OS=Rattus norvegicus GN=Mrps23 PE=4 SV=1 - [D3ZIN7_RAT]	11.3	1	2	2	3	20.3086	9.24658	0	5.65	1	1	2.25419	5.65	1	1	1.84679	5.65	1	1	177
D4A3E8	Mitochondrial ribosomal protein S27 (Predicted), isoform CRA_b OS=Rattus norvegicus GN=Mrps27 PE=4 SV=1 - [D4A3E8_RAT]	6.51	1	2	2	3	47.618	5.32568	8.23251	6.51	2	3		0				0			415
D4A4A9	Protein Mrpl19 OS=Rattus norvegicus GN=Mrpl19 PE=4 SV=1 - [D4A4A9_RAT]	6.51	1	2	2	3	33.6113	9.36377	3.93884	6.51	2	2		0			2.12852	3.08	1	1	292
D4A8P9	Protein Iars2 OS=Rattus norvegicus GN=Iars2 PE=3 SV=2 - [D4A8P9_RAT]	5.88	1	2	2	3	48.6503	7.35693	0	5.88	2	2	0	3.85	1	1		0			442
E9PTM2	Protein Zfc3h1 OS=Rattus norvegicus GN=Zfc3h1 PE=2 SV=2 - [E9PTM2_RAT]	1.04	1	1	1	3	206.014	7.50342		0			3.2907	1.04	1	1	6.37027	1.04	1	2	1822
F1LRK4	Protein Grsf1 OS=Rattus norvegicus GN=Grsf1 PE=2 SV=2 - [F1LRK4_RAT]	5.85	1	2	2	3	52.8736	6.66846		0			5.46457	3.34	1	2	3.8404	2.51	1	1	479
F1LRY5	RCG45398 OS=Rattus norvegicus GN=Sardh PE=3 SV=2 - [F1LRY5_RAT]	2.83	2	2	2	3	101.35	6.62451	4.63388	2.83	2	2	1.94778	1.2	1	1		0			919
F1M7X3	Protein Cdh13 (Fragment) OS=Rattus norvegicus GN=Cdh13 PE=2 SV=2 - [F1M7X3_RAT]	3.93	1	2	2	3	72.2889	5.14795	2.38108	2.11	1	1		0			5.87276	3.93	2	2	662
F1M8X2	Uncharacterized protein (Fragment) OS=Rattus norvegicus GN=LOC100359882 PE=3 SV=2 - [F1M8X2_RAT]	6.44	2	1	1	3	22.463	4.4624	2.35741	6.44	1	1	3.71685	6.44	1	1	3.25153	6.44	1	1	202
G3V836	Clusterin OS=Rattus norvegicus GN=Clu PE=3 SV=1 - [G3V836_RAT]	7.38	2	2	2	3	51.3873	5.80811	2.76348	3.8	1	1	2.30101	3.58	1	1	1.70894	3.8	1	1	447
G3V8F5	Mitochondrial import receptor subunit TOM40 homolog OS=Rattus norvegicus GN=Tomm40 PE=4 SV=1 - [G3V8F5_RAT]	15.51	2	3	3	3	37.8961	7.97217	4.78923	12.47	2	2		0			2.7727	3.05	1	1	361
G3V9S0	Cytochrome b5 reductase 1 OS=Rattus norvegicus GN=Cyb5r1 PE=4 SV=1 - [G3V9S0_RAT]	9.84	2	3	3	3	34.2111	8.83643		0			4.12656	7.21	2	2	2.54659	2.62	1	1	305
M0R515	Protein Nudt13 OS=Rattus norvegicus GN=Nudt13 PE=4 SV=1 - [M0R515_RAT]	6.25	1	2	2	3	39.3269	7.45947		0			4.17378	6.25	2	2	0	2.56	1	1	352
M0R6J0	Protein Mrpl39 OS=Rattus norvegicus GN=LOC684304 PE=4 SV=1 - [M0R6J0_RAT]	10.69	1	2	2	3	36.5448	8.35303	2.86301	5.97	1	1	2.71767	4.72	1	1	3.64813	4.72	1	1	318
M0RBK9	Protein Pnkd OS=Rattus norvegicus GN=Pnkd PE=4 SV=1 - [M0RBK9_RAT]	10.56	2	1	1	3	15.5881	10.272	2.05418	10.56	1	1	1.94247	10.56	1	1	2.73973	10.56	1	1	142
M0RBY5	Protein LOC687068 OS=Rattus norvegicus GN=LOC687068 PE=3 SV=1 - [M0RBY5_RAT]	9.56	5	1	2	3	29.865	7.84033	4.03759	6.25	1	1	5.47603	9.56	2	2		0			272
O89035	Mitochondrial dicarboxylate carrier OS=Rattus norvegicus GN=Slc25a10 PE=2 SV=1 - [O89035_RAT]	8.39	1	1	1	3	31.4341	9.29053	2.85649	8.39	1	1	2.75793	8.39	1	1	2.43898	8.39	1	1	286
Q5XFW4	Mitochondrial ribosomal protein L13 OS=Rattus norvegicus GN=Mrpl13 PE=2 SV=1 - [Q5XFW4_RAT]	12.92	1	2	2	3	20.5276	9.15869	1.92572	5.62	1	1	2.08125	12.92	2	2		0			178
Q5XI86	Peptidyl-tRNA hydrolase 2 OS=Rattus norvegicus GN=Ptrh2 PE=1 SV=1 - [Q5XI86_RAT]	18.23	1	2	2	3	19.5171	7.41553	5.32072	8.29	1	2		0			2.76012	9.94	1	1	181
Q64559-1	Isoform 1 of Cytosolic acyl coenzyme A thioester hydrolase OS=Rattus norvegicus GN=Acot7 - [BACH_RAT]	6.8	3	2	2	3	37.5372	7.51807	4.25781	3.55	1	2	2.23804	3.25	1	1		0			338
Q920A6	Retinoid-inducible serine carboxypeptidase OS=Rattus norvegicus GN=Scpep1 PE=2 SV=1 - [RISC_RAT]	1.99	1	1	1	2	51.1418	5.52881		0				0			3.66216	1.99	1	2	452
Q3T1K5	F-actin-capping protein subunit alpha-2 OS=Rattus norvegicus GN=Capza2 PE=1 SV=1 - [CAZA2_RAT]	9.79	2	2	2	2	32.9466	5.84619		0			2.31215	3.5	1	1	3.48007	6.29	1	1	286
P18297	Sepiapterin reductase OS=Rattus norvegicus GN=Spr PE=1 SV=1 - [SPRE_RAT]	5.73	1	1	1	2	28.1105	5.70654	3.58301	5.73	1	1		0			4.4352	5.73	1	1	262
Q641Z6	EH domain-containing protein 1 OS=Rattus norvegicus GN=Ehd1 PE=1 SV=1 - [EHD1_RAT]	3.75	2	2	2	2	60.5646	6.82959	2.57839	2.06	1	1	0	1.69	1	1		0			534
P05065	Fructose-bisphosphate aldolase A OS=Rattus norvegicus GN=Aldoa PE=1 SV=2 - [ALDOA_RAT]	3.85	2	1	1	2	39.3273	8.08936	3.3281	3.85	1	1	1.90739	3.85	1	1		0			364
P14562	Lysosome-associated membrane glycoprotein 1 OS=Rattus norvegicus GN=Lamp1 PE=1 SV=1 - [LAMP1_RAT]	2.21	1	1	1	2	43.9412	8.07471		0			3.82963	2.21	1	2		0			407
P14668	Annexin A5 OS=Rattus norvegicus GN=Anxa5 PE=1 SV=3 - [ANXA5_RAT]	9.72	2	2	2	2	35.7223	5.04639	5.14596	9.72	2	2		0				0			319
Q9EPJ3	28S ribosomal protein S26, mitochondrial OS=Rattus norvegicus GN=Mrps26 PE=1 SV=1 - [RT26_RAT]	13.5	1	2	2	2	23.3356	9.96436	2.89463	8	1	1		0			2.50337	5.5	1	1	200
O35092	Mitochondrial import inner membrane translocase subunit Tim17-A OS=Rattus norvegicus GN=Timm17a PE=2 SV=1 - [TI17A_RAT]	12.87	1	1	1	2	18.026	7.89893	6.23687	12.87	1	2		0				0			171
P62078	Mitochondrial import inner membrane translocase subunit Tim8 B OS=Rattus norvegicus GN=Timm8b PE=3 SV=1 - [TIM8B_RAT]	13.25	1	1	1	2	9.28052	5.12256		0			2.19272	13.25	1	1	2.95944	13.25	1	1	83
P68511	14-3-3 protein eta OS=Rattus norvegicus GN=Ywhah PE=1 SV=2 - [1433F_RAT]	4.07	1	1	1	2	28.194	4.89404		0				0			1.66542	4.07	1	2	246
Q5M7W7	Probable proline--tRNA ligase, mitochondrial OS=Rattus norvegicus GN=Pars2 PE=2 SV=1 - [SYPM_RAT]	2.11	1	1	1	2	53.2982	7.82568		0				0			1.84589	2.11	1	2	475
P31044	Phosphatidylethanolamine-binding protein 1 OS=Rattus norvegicus GN=Pebp1 PE=1 SV=3 - [PEBP1_RAT]	7.49	1	1	1	2	20.7884	5.79541		0			3.18586	7.49	1	1	2.0842	7.49	1	1	187
Q5I0P2	Glycine cleavage system H protein, mitochondrial OS=Rattus norvegicus GN=Gcsh PE=2 SV=1 - [GCSH_RAT]	15.88	1	2	2	2	18.4734	5.0083		0				0			5.81517	15.88	2	2	170
P0C089	Phosphatidylglycerophosphatase and protein-tyrosine phosphatase 1 OS=Rattus norvegicus GN=Ptpmt1 PE=2 SV=1 - [PTPM1_RAT]	10.36	2	2	2	2	21.8725	9.5835		0			2.07688	6.22	1	1	0	4.15	1	1	193
Q5RKI8	ATP-binding cassette sub-family B member 8, mitochondrial OS=Rattus norvegicus GN=Abcb8 PE=2 SV=1 - [ABCB8_RAT]	3.5	1	2	2	2	77.7211	9.5249	5.34633	3.5	2	2		0				0			714
Q5RJQ7	Succinate dehydrogenase assembly factor 2, mitochondrial OS=Rattus norvegicus GN=Sdhaf2 PE=2 SV=1 - [SDHF2_RAT]	7.32	1	1	1	2	19.5121	6.59521	2.21128	7.32	1	2		0				0			164
Q6IG00	Keratin, type II cytoskeletal 4 OS=Rattus norvegicus GN=Krt4 PE=2 SV=1 - [K2C4_RAT]	3.73	4	1	2	2	57.631	7.63525	2.91717	2.24	1	1		0			2.03336	1.49	1	1	536
Q6AYE2	Endophilin-B1 OS=Rattus norvegicus GN=Sh3glb1 PE=2 SV=1 - [SHLB1_RAT]	3.01	1	1	1	2	40.7618	6.03662	0	3.01	1	1	0	3.01	1	1		0			365
B2GV71	NADH dehydrogenase [ubiquinone] 1 alpha subcomplex assembly factor 5 OS=Rattus norvegicus GN=Ndufaf5 PE=2 SV=1 - [NDUF5_RAT]	7	1	2	2	2	38.2053	6.46826	2.90959	3.5	1	1		0			1.62794	3.5	1	1	343
Q4V8H8	EH domain-containing protein 2 OS=Rattus norvegicus GN=Ehd2 PE=1 SV=1 - [EHD2_RAT]	3.68	1	2	2	2	61.1988	6.55127	2.56845	2.21	1	1	0	1.47	1	1		0			543
Q5XIF9	Solute carrier family 25 member 34 OS=Rattus norvegicus GN=Slc25a34 PE=2 SV=2 - [S2534_RAT]	3.46	1	1	1	2	33.6303	8.71924		0				0			5.17137	3.46	1	2	318
B4F7A1	Complex III assembly factor LYRM7 OS=Rattus norvegicus GN=Lyrm7 PE=3 SV=1 - [LYRM7_RAT]	27.88	2	2	2	2	12.0225	9.45166	7.23531	27.88	2	2		0				0			104
A9UMV7	Protein Uqcr11 OS=Rattus norvegicus GN=LOC686442 PE=4 SV=1 - [A9UMV7_RAT]	21.43	1	1	1	2	6.53444	9.70068	8.29302	21.43	1	2		0				0			56
B0BN68	Mitochondrial ribosomal protein S9 OS=Rattus norvegicus GN=Mrps9 PE=2 SV=1 - [B0BN68_RAT]	2.82	1	1	1	2	44.982	9.11475	3.0234	2.82	1	1		0			2.05421	2.82	1	1	390
B2GV65	HIG1 domain family, member 2A OS=Rattus norvegicus GN=Higd2a PE=4 SV=1 - [B2GV65_RAT]	17.92	2	1	1	2	11.4229	9.78857		0			3.49236	17.92	1	1	4.22089	17.92	1	1	106
B2RYS8	NADH dehydrogenase (Ubiquinone) 1 beta subcomplex 8 OS=Rattus norvegicus GN=Ndufb8 PE=2 SV=1 - [B2RYS8_RAT]	13.44	1	2	2	2	21.9444	6.04932		0			4.35044	13.44	2	2		0			186
B2RYW4	Mitochondrial ribosomal protein L53 OS=Rattus norvegicus GN=Mrpl53 PE=4 SV=1 - [B2RYW4_RAT]	15.13	1	1	1	2	12.7266	9.84717	4.83638	15.13	1	2		0				0			119
D3ZJ83	Protein Sco2 OS=Rattus norvegicus GN=Sco2 PE=4 SV=1 - [D3ZJ83_RAT]	3.89	1	1	1	2	29.136	7.62061	1.69096	3.89	1	1	2.36303	3.89	1	1		0			257
D3ZPV7	Protein Foxred1 OS=Rattus norvegicus GN=Foxred1 PE=2 SV=1 - [D3ZPV7_RAT]	3.42	2	1	1	2	32.5817	8.44092		0			1.66542	3.42	1	1	1.86385	3.42	1	1	292
D3ZZV1	Mitochondrial import inner membrane translocase subunit TIM16 OS=Rattus norvegicus GN=Pam16 PE=4 SV=1 - [D3ZZV1_RAT]	21.6	1	1	1	2	13.7632	9.5249	6.06262	21.6	1	2		0				0			125
D4ADU8	Pyruvate kinase OS=Rattus norvegicus PE=3 SV=2 - [D4ADU8_RAT]	2.35	5	1	1	2	51.7069	5.60498	1.70574	2.35	1	1		0			2.00456	2.35	1	1	469
F1LNV4	ATP-binding cassette sub-family B member 7, mitochondrial OS=Rattus norvegicus GN=Abcb7 PE=2 SV=2 - [F1LNV4_RAT]	1.33	2	1	1	2	82.703	9.29053		0			2.08975	1.33	1	1	2.18215	1.33	1	1	752
F1LP82	Ras-related protein Rab-2A (Fragment) OS=Rattus norvegicus GN=Rab2a PE=2 SV=2 - [F1LP82_RAT]	6.63	3	1	1	2	21.6828	6.53662		0			3.29936	6.63	1	1	2.58404	6.63	1	1	196
F1LSJ6	Methionine sulfoxide reductase A OS=Rattus norvegicus GN=Msra PE=3 SV=2 - [F1LSJ6_RAT]	14.44	7	2	2	2	20.0439	8.27979	2.58472	8.33	1	1		0			2.09084	6.11	1	1	180
F7F134	Voltage-dependent calcium channel subunit alpha-2/delta-1 OS=Rattus norvegicus GN=Cacna2d1 PE=4 SV=1 - [F7F134_RAT]	1.24	3	1	1	2	118.436	5.21143		0				0			4.35342	1.24	1	2	1045
G3V6S0	Protein Sptbn1 OS=Rattus norvegicus GN=Sptbn1 PE=4 SV=2 - [G3V6S0_RAT]	1.27	1	2	2	2	273.317	5.71924		0				0			4.2395	1.27	2	2	2357
G3V8F9	Alpha-methylacyl-CoA racemase OS=Rattus norvegicus GN=Amacr PE=4 SV=1 - [G3V8F9_RAT]	7.33	3	2	2	2	41.7255	6.68311	0	3.14	1	1		0			1.78439	4.19	1	1	382
G3V985	Protein Sco1 OS=Rattus norvegicus GN=Sco1 PE=4 SV=1 - [G3V985_RAT]	4.58	1	1	1	2	31.7484	8.74854		0			2.28999	4.58	1	1	3.30441	4.58	1	1	284
G3V9J1	Uncharacterized protein OS=Rattus norvegicus GN=LOC297568 PE=4 SV=2 - [G3V9J1_RAT]	0.62	7	1	1	2	144.701	8.1626	2.07821	0.62	1	1	0	0.62	1	1		0			1291
M0R5H9	Uncharacterized protein OS=Rattus norvegicus PE=4 SV=1 - [M0R5H9_RAT]	3.13	1	1	1	2	34.4568	9.5542	2.01557	3.13	1	1	1.67193	3.13	1	1		0			319
P11507-2	Isoform SERCA2A of Sarcoplasmic/endoplasmic reticulum calcium ATPase 2 OS=Rattus norvegicus GN=Atp2a2 - [AT2A2_RAT]	2.51	6	2	2	2	109.61	5.36377		0				0			1.66817	2.51	2	2	997
Q06C60	BolA-like 1 (E. coli) (Predicted) OS=Rattus norvegicus GN=Bola1 PE=2 SV=1 - [Q06C60_RAT]	12.41	1	1	1	2	14.3944	9.20264	6.12886	12.41	1	2		0				0			137
Q5FVL8	ATP-binding cassette, sub-family B (MDR/TAP), member 10 OS=Rattus norvegicus GN=Abcb10 PE=2 SV=1 - [Q5FVL8_RAT]	3.5	1	1	1	2	77.346	9.62744	2.63124	3.5	1	1		0			0	3.5	1	1	715
Q5RJR9	Serine (Or cysteine) proteinase inhibitor, clade H, member 1, isoform CRA_b OS=Rattus norvegicus GN=Serpinh1 PE=2 SV=1 - [Q5RJR9_RAT]	7.19	2	2	2	2	46.5322	8.82178	5.69395	7.19	2	2		0				0			417
Q8VBU2-2	Isoform 2 of Protein NDRG2 OS=Rattus norvegicus GN=Ndrg2 - [NDRG2_RAT]	8.4	2	2	2	2	39.2453	5.49072		0				0			6.35519	8.4	2	2	357
Q9JKB7	Guanine deaminase OS=Rattus norvegicus GN=Gda PE=2 SV=1 - [Q9JKB7_RAT]	2.86	2	1	1	2	50.8687	5.71924		0			1.62623	2.86	1	1	2.9178	2.86	1	1	454
R9PXR4	Mitochondrial import receptor subunit TOM70 OS=Rattus norvegicus GN=Tomm70a PE=4 SV=1 - [R9PXR4_RAT]	1.43	2	1	1	2	61.8991	7.48877		0			4.08424	1.43	1	2		0			560
P62963	Profilin-1 OS=Rattus norvegicus GN=Pfn1 PE=1 SV=2 - [PROF1_RAT]	11.43	1	1	1	1	14.9475	8.27979		0			2.39348	11.43	1	1		0			140
P21588	5'-nucleotidase OS=Rattus norvegicus GN=Nt5e PE=1 SV=1 - [5NTD_RAT]	2.6	2	1	1	1	63.9281	6.97607	2.18166	2.6	1	1		0				0			576
P01161	Natriuretic peptides A OS=Rattus norvegicus GN=Nppa PE=1 SV=1 - [ANF_RAT]	5.92	1	1	1	1	16.5453	7.29834		0			2.48037	5.92	1	1		0			152
Q8R4Z9	Mitofusin-1 OS=Rattus norvegicus GN=Mfn1 PE=1 SV=1 - [MFN1_RAT]	1.35	1	1	1	1	83.7938	6.53662	2.48976	1.35	1	1		0				0			741
P62815	V-type proton ATPase subunit B, brain isoform OS=Rattus norvegicus GN=Atp6v1b2 PE=1 SV=1 - [VATB2_RAT]	2.35	1	1	1	1	56.5149	5.80811	1.98085	2.35	1	1		0				0			511
P62836	Ras-related protein Rap-1A OS=Rattus norvegicus GN=Rap1a PE=1 SV=1 - [RAP1A_RAT]	5.43	2	1	1	1	20.9737	6.66846	0	5.43	1	1		0				0			184
P80067	Dipeptidyl peptidase 1 OS=Rattus norvegicus GN=Ctsc PE=1 SV=3 - [CATC_RAT]	1.95	1	1	1	1	52.2017	6.88818		0			2.24072	1.95	1	1		0			462
P03889	NADH-ubiquinone oxidoreductase chain 1 OS=Rattus norvegicus GN=Mtnd1 PE=1 SV=2 - [NU1M_RAT]	2.83	1	1	1	1	36.1529	6.93213		0			1.88027	2.83	1	1		0			318
P42676	Neurolysin, mitochondrial OS=Rattus norvegicus GN=Nln PE=1 SV=1 - [NEUL_RAT]	1.56	1	1	1	1	80.2025	6.46826	2.55987	1.56	1	1		0				0			704
Q9QXU2	Surfeit locus protein 1 OS=Rattus norvegicus GN=Surf1 PE=2 SV=1 - [SURF1_RAT]	3.59	2	1	1	1	34.6608	9.56885		0			0	3.59	1	1		0			306
Q9R1T3	Cathepsin Z OS=Rattus norvegicus GN=Ctsz PE=1 SV=2 - [CATZ_RAT]	3.27	1	1	1	1	34.1724	7.15186	1.63644	3.27	1	1		0				0			306
P18484	AP-2 complex subunit alpha-2 OS=Rattus norvegicus GN=Ap2a2 PE=1 SV=3 - [AP2A2_RAT]	2.99	2	1	1	1	103.979	6.93213		0			2.06362	2.99	1	1		0			938
P51886	Lumican OS=Rattus norvegicus GN=Lum PE=2 SV=1 - [LUM_RAT]	3.25	1	1	1	1	38.2546	6.43018	0	3.25	1	1		0				0			338
P35565	Calnexin OS=Rattus norvegicus GN=Canx PE=1 SV=1 - [CALX_RAT]	2.71	1	1	1	1	67.2126	4.62744	3.59742	2.71	1	1		0				0			591
Q03344	ATPase inhibitor, mitochondrial OS=Rattus norvegicus GN=Atpif1 PE=3 SV=2 - [ATIF1_RAT]	10.28	1	1	1	1	12.2403	9.59814	2.12617	10.28	1	1		0				0			107
P05508	NADH-ubiquinone oxidoreductase chain 4 OS=Rattus norvegicus GN=Mtnd4 PE=2 SV=2 - [NU4M_RAT]	4.14	2	1	1	1	51.7655	9.40771	3.43591	4.14	1	1		0				0			459
Q64194	Lysosomal acid lipase/cholesteryl ester hydrolase OS=Rattus norvegicus GN=Lipa PE=2 SV=1 - [LICH_RAT]	3.27	2	1	1	1	45.1566	7.04932	2.94843	3.27	1	1		0				0			397
P07151	Beta-2-microglobulin OS=Rattus norvegicus GN=B2m PE=1 SV=1 - [B2MG_RAT]	10.92	1	1	1	1	13.7111	8.00146	2.73302	10.92	1	1		0				0			119
P11608	ATP synthase protein 8 OS=Rattus norvegicus GN=Mt-atp8 PE=1 SV=1 - [ATP8_RAT]	19.4	3	1	1	1	7.63698	9.31982		0			2.94458	19.4	1	1		0			67
P00786	Pro-cathepsin H OS=Rattus norvegicus GN=Ctsh PE=1 SV=1 - [CATH_RAT]	3.9	1	1	1	1	37.0799	8.41162	2.03802	3.9	1	1		0				0			333
Q7TQ82	28S ribosomal protein S10, mitochondrial OS=Rattus norvegicus GN=Mrps10 PE=2 SV=1 - [RT10_RAT]	7.74	1	1	1	1	17.9484	8.646	2.14883	7.74	1	1		0				0			155
P04639	Apolipoprotein A-I OS=Rattus norvegicus GN=Apoa1 PE=1 SV=2 - [APOA1_RAT]	3.47	1	1	1	1	30.0432	5.74463	2.0714	3.47	1	1		0				0			259
Q6AYD9	Nucleoside diphosphate-linked moiety X motif 19, mitochondrial OS=Rattus norvegicus GN=Nudt19 PE=2 SV=1 - [NUD19_RAT]	3.36	1	1	1	1	39.9133	6.88818	2.6134	3.36	1	1		0				0			357
Q6TUG0	DnaJ homolog subfamily B member 11 OS=Rattus norvegicus GN=Dnajb11 PE=2 SV=1 - [DJB11_RAT]	4.47	1	1	1	1	40.4697	6.31592	2.12183	4.47	1	1		0				0			358
Q68FW7	Threonine--tRNA ligase, mitochondrial OS=Rattus norvegicus GN=Tars2 PE=2 SV=1 - [SYTM_RAT]	1.66	1	1	1	1	81.6208	7.86963		0				0			1.79136	1.66	1	1	723
Q5U2V4	Phospholipase B-like 1 OS=Rattus norvegicus GN=Plbd1 PE=2 SV=1 - [PLBL1_RAT]	2.18	1	1	1	1	62.9867	8.60205		0			0	2.18	1	1		0			550
Q5FWT5	Glutamyl-tRNA(Gln) amidotransferase subunit A, mitochondrial OS=Rattus norvegicus GN=Qrsl1 PE=2 SV=1 - [GATA_RAT]	2.1	1	1	1	1	56.8018	5.90967	1.91611	2.1	1	1		0				0			525
Q5FVQ8	NLR family member X1 OS=Rattus norvegicus GN=Nlrx1 PE=2 SV=1 - [NLRX1_RAT]	1.13	1	1	1	1	107.522	7.56201		0			1.64124	1.13	1	1		0			973
Q4V897	Coiled-coil domain-containing protein 90B, mitochondrial OS=Rattus norvegicus GN=Ccdc90b PE=2 SV=1 - [CC90B_RAT]	7.42	1	1	1	1	29.7814	8.36768	2.49573	7.42	1	1		0				0			256
P20059	Hemopexin OS=Rattus norvegicus GN=Hpx PE=1 SV=3 - [HEMO_RAT]	2.39	1	1	1	1	51.3183	7.6499		0			2.73888	2.39	1	1		0			460
Q66H47	39S ribosomal protein L24, mitochondrial OS=Rattus norvegicus GN=Mrpl24 PE=2 SV=1 - [RM24_RAT]	6.48	1	1	1	1	24.985	9.49561	0	6.48	1	1		0				0			216
Q9NQR8	NADH dehydrogenase [ubiquinone] 1 alpha subcomplex assembly factor 4 OS=Rattus norvegicus GN=Ndufaf4 PE=1 SV=1 - [NDUF4_RAT]	5.17	1	1	1	1	20.1457	8.99756		0				0			1.60847	5.17	1	1	174
Q68FQ0	T-complex protein 1 subunit epsilon OS=Rattus norvegicus GN=Cct5 PE=1 SV=1 - [TCPE_RAT]	1.85	1	1	1	1	59.4988	5.71924	0	1.85	1	1		0				0			541
D4A7N1	Coiled-coil-helix-coiled-coil-helix domain-containing protein 6, mitochondrial OS=Rattus norvegicus GN=Chchd6 PE=2 SV=1 - [CHCH6_RAT]	3.07	1	1	1	1	29.1928	7.94287		0				0			2.09396	3.07	1	1	261
Q5PQN9	39S ribosomal protein L38, mitochondrial OS=Rattus norvegicus GN=Mrpl38 PE=2 SV=2 - [RM38_RAT]	2.37	1	1	1	1	44.8095	7.88428	2.16082	2.37	1	1		0				0			380
Q00972	[3-methyl-2-oxobutanoate dehydrogenase [lipoamide]] kinase, mitochondrial OS=Rattus norvegicus GN=Bckdk PE=1 SV=2 - [BCKD_RAT]	4.13	1	1	1	1	46.4452	8.76318	2.48723	4.13	1	1		0				0			412
Q4QQW8	Putative phospholipase B-like 2 OS=Rattus norvegicus GN=Plbd2 PE=1 SV=2 - [PLBL2_RAT]	2.05	1	1	1	1	65.4139	6.69775	2.64068	2.05	1	1		0				0			585
Q498U3	Solute carrier family 25 member 40 OS=Rattus norvegicus GN=Slc25a40 PE=2 SV=2 - [S2540_RAT]	2.97	2	1	1	1	38.0364	8.38232		0				0			1.69964	2.97	1	1	337
B2GUX7	Cellular repressor of E1A-stimulated genes (Predicted), isoform CRA_b OS=Rattus norvegicus GN=Creg1 PE=2 SV=1 - [B2GUX7_RAT]	6.36	1	1	1	1	24.3723	6.41748	2.2561	6.36	1	1		0				0			220
B2RZ57	Mitochondrial ribosomal protein L18 OS=Rattus norvegicus GN=Mrpl18 PE=2 SV=1 - [B2RZ57_RAT]	5	1	1	1	1	20.6375	8.85107	2.17769	5	1	1		0				0			180
D3Z946	Protein Tmem70 OS=Rattus norvegicus GN=Tmem70 PE=4 SV=1 - [D3Z946_RAT]	3.56	1	1	1	1	28.3806	8.90967	0	3.56	1	1		0				0			253
D3Z9Z0	Ankyrin 1, erythroid OS=Rattus norvegicus GN=Ank1 PE=4 SV=1 - [D3Z9Z0_RAT]	0.88	1	1	1	1	187.008	6.69775		0				0			2.5082	0.88	1	1	1707
D3ZF13	Acyl carrier protein OS=Rattus norvegicus GN=LOC683884 PE=3 SV=1 - [D3ZF13_RAT]	5.77	1	1	1	1	17.5031	5.07178		0			1.81917	5.77	1	1		0			156
D3ZFJ6	Lactamase, beta (Predicted) OS=Rattus norvegicus GN=Lactb PE=4 SV=1 - [D3ZFJ6_RAT]	2.73	1	1	1	1	60.382	8.82178	2.48616	2.73	1	1		0				0			550
D3ZFZ1	Protein Zfp157 OS=Rattus norvegicus GN=Zfp157 PE=4 SV=1 - [D3ZFZ1_RAT]	1.41	1	1	1	1	66.3741	8.47021		0			0	1.41	1	1		0			568
D3ZGJ2	Protein Espnl OS=Rattus norvegicus GN=Espnl PE=4 SV=2 - [D3ZGJ2_RAT]	0.8	1	1	1	1	108.319	5.87158		0			2.01247	0.8	1	1		0			999
D3ZH76	Protein RGD1304931 OS=Rattus norvegicus GN=RGD1304931 PE=4 SV=1 - [D3ZH76_RAT]	2.92	1	1	1	1	83.3148	5.23682		0				0			2.23008	2.92	1	1	788
D3ZJH9	Malic enzyme OS=Rattus norvegicus GN=Me2 PE=3 SV=1 - [D3ZJH9_RAT]	2.57	1	1	1	1	65.3097	7.75244		0			0	2.57	1	1		0			584
D3ZNV9	Complement component C1q receptor OS=Rattus norvegicus GN=Cd93 PE=4 SV=2 - [D3ZNV9_RAT]	1.72	2	1	1	1	68.3188	5.04639		0			0	1.72	1	1		0			639
D3ZT98	Protein Bola3 OS=Rattus norvegicus GN=Bola3 PE=3 SV=1 - [D3ZT98_RAT]	11.82	1	1	1	1	12.2893	9.24658	2.25098	11.82	1	1		0				0			110
D3ZUF9	Pitrilysin metallepetidase 1 (Predicted) OS=Rattus norvegicus GN=Pitrm1 PE=3 SV=1 - [D3ZUF9_RAT]	1.36	1	1	1	1	108.475	7.32764	2.75875	1.36	1	1		0				0			954
D3ZUM4	Beta-galactosidase OS=Rattus norvegicus GN=Glb1 PE=3 SV=1 - [D3ZUM4_RAT]	1.55	1	1	1	1	73.1813	7.48877		0			2.42131	1.55	1	1		0			647
D3ZX69	39S ribosomal protein L10, mitochondrial OS=Rattus norvegicus GN=Mrpl10 PE=4 SV=1 - [D3ZX69_RAT]	7.25	2	1	1	1	29.4469	9.74463	2.2434	7.25	1	1		0				0			262
D3ZY44	Protein Mrps2 OS=Rattus norvegicus GN=Mrps2 PE=3 SV=1 - [D3ZY44_RAT]	5.15	1	1	1	1	32.1556	9.15869	2.46534	5.15	1	1		0				0			291
D4A7L4	NADH dehydrogenase (Ubiquinone) 1 beta subcomplex, 11 (Predicted) OS=Rattus norvegicus GN=Ndufb11 PE=4 SV=1 - [D4A7L4_RAT]	6.62	1	1	1	1	17.6229	5.23682		0			0	6.62	1	1		0			151
D4A7X5	Protein Ppm1k OS=Rattus norvegicus GN=Ppm1k PE=3 SV=1 - [D4A7X5_RAT]	3.23	1	1	1	1	40.9876	6.53662		0				0			2.53598	3.23	1	1	372
D4A9L2	Protein Srsf1 OS=Rattus norvegicus GN=Srsf1 PE=4 SV=1 - [D4A9L2_RAT]	4.84	1	1	1	1	27.7278	10.3599		0			1.60256	4.84	1	1		0			248
D4A9Z6	Mitochondrial ribosomal protein S35 (Predicted) OS=Rattus norvegicus GN=Mrps35 PE=4 SV=1 - [D4A9Z6_RAT]	4.69	1	1	1	1	36.1838	9.15869		0			3.12217	4.69	1	1		0			320
D4ABA9	Protein LOC100910104 OS=Rattus norvegicus GN=LOC100910104 PE=2 SV=1 - [D4ABA9_RAT]	1.06	1	1	1	1	122.388	5.22412	1.72546	1.06	1	1		0				0			1127
D4ABR5	Protein RGD1560175 OS=Rattus norvegicus GN=RGD1560175 PE=4 SV=2 - [D4ABR5_RAT]	0.32	2	1	1	1	236.887	7.60596		0			2.37161	0.32	1	1		0			2218
D4AC65	Protein Selrc1 OS=Rattus norvegicus GN=Selrc1 PE=4 SV=1 - [D4AC65_RAT]	3.9	1	1	1	1	25.6941	6.07471	1.78282	3.9	1	1		0				0			231
D4AEC0	Histone H2A OS=Rattus norvegicus GN=H2afv PE=3 SV=1 - [D4AEC0_RAT]	7.03	18	1	1	1	13.5005	10.5796		0			1.75006	7.03	1	1		0			128
F1LPX0	Mitochondrial intermediate peptidase OS=Rattus norvegicus GN=Mipep PE=2 SV=1 - [F1LPX0_RAT]	1.83	2	1	1	1	80.6023	6.46826	3.16515	1.83	1	1		0				0			710
F1LPY7	Trans-2-enoyl-CoA reductase, mitochondrial OS=Rattus norvegicus GN=Mecr PE=2 SV=1 - [F1LPY7_RAT]	3.75	2	1	1	1	40.3092	8.77783		0				0			3.53473	3.75	1	1	373
F1LQC1	Acyl-coenzyme A oxidase OS=Rattus norvegicus GN=Acox1 PE=3 SV=2 - [F1LQC1_RAT]	3.33	4	1	1	1	74.5322	8.47021		0			2.43654	3.33	1	1		0			660
F1LT52	Protein LOC690284 (Fragment) OS=Rattus norvegicus GN=LOC690284 PE=4 SV=1 - [F1LT52_RAT]	1.56	2	1	1	1	69.1577	7.29834		0			0	1.56	1	1		0			640
F1M944	Calsequestrin OS=Rattus norvegicus GN=Casq2 PE=2 SV=1 - [F1M944_RAT]	3.15	2	1	1	1	47.8683	4.31006		0				0			3.3711	3.15	1	1	413
F1M9C9	Protein Hars2 OS=Rattus norvegicus GN=Hars2 PE=2 SV=1 - [F1M9C9_RAT]	2.96	1	1	1	1	57.2908	7.85498	2.14133	2.96	1	1		0				0			507
F1MAR6	Protein Prodh OS=Rattus norvegicus GN=Prodh PE=4 SV=2 - [F1MAR6_RAT]	2	1	1	1	1	68.0513	7.26904		0				0			2.22752	2	1	1	599
F7EVC6	Protein Hebp1 OS=Rattus norvegicus GN=Hebp1 PE=4 SV=1 - [F7EVC6_RAT]	12.12	1	1	1	1	14.5843	5.10986	2.25225	12.12	1	1		0				0			132
G3V670	Methionine aminopeptidase OS=Rattus norvegicus GN=Metap1d PE=3 SV=1 - [G3V670_RAT]	4.19	1	1	1	1	37.0619	6.82959	2.34183	4.19	1	1		0				0			334
G3V804	Sideroflexin 3 OS=Rattus norvegicus GN=Sfxn3 PE=4 SV=1 - [G3V804_RAT]	4.67	2	1	1	1	35.4286	9.68604	1.98712	4.67	1	1		0				0			321
G3V8D4	Apolipoprotein C-II (Predicted) OS=Rattus norvegicus GN=Apoc2 PE=4 SV=1 - [G3V8D4_RAT]	9.28	1	1	1	1	10.6883	4.61475		0				0			2.34816	9.28	1	1	97
G3V8W9	Protein Tstd3 OS=Rattus norvegicus GN=Tstd3 PE=4 SV=1 - [G3V8W9_RAT]	13.38	1	1	1	1	17.525	8.26514		0				0			3.21504	13.38	1	1	157
G3V9S6	Protein Ndufa1 OS=Rattus norvegicus GN=Ndufa1 PE=4 SV=2 - [G3V9S6_RAT]	14.29	1	1	1	1	8.14223	9.48096	1.95365	14.29	1	1		0				0			70
G3V9U6	Protein Gtpbp5 OS=Rattus norvegicus GN=Gtpbp5 PE=3 SV=1 - [G3V9U6_RAT]	3.69	1	1	1	1	44.2261	8.19189		0			2.42023	3.69	1	1		0			406
M0R3K2	Glutamyl-tRNA(Gln) amidotransferase subunit C, mitochondrial OS=Rattus norvegicus GN=LOC100909836 PE=3 SV=1 - [M0R3K2_RAT]	6.38	2	1	1	1	15.4279	5.35107		0				0			0	6.38	1	1	141
M0R3T0	Protein Oxld1 OS=Rattus norvegicus GN=LOC688310 PE=4 SV=1 - [M0R3T0_RAT]	7.43	1	1	1	1	22.2972	8.51416	2.71018	7.43	1	1		0				0			202
M0R3T5	Uncharacterized protein (Fragment) OS=Rattus norvegicus PE=4 SV=1 - [M0R3T5_RAT]	5.7	4	1	1	1	32.7244	9.90576		0				0			2.63135	5.7	1	1	316
M0R776	Protein Mrps36 OS=Rattus norvegicus GN=Mrps36 PE=4 SV=1 - [M0R776_RAT]	12.62	2	1	1	1	11.406	10.3452	3.20887	12.62	1	1		0				0			103
M0R9E4	Protein Ccdc57 OS=Rattus norvegicus GN=Ccdc57 PE=4 SV=1 - [M0R9E4_RAT]	0.89	1	1	1	1	115.718	8.04541		0				0			1.66812	0.89	1	1	1015
M0RA23	Peptidyl-prolyl cis-trans isomerase OS=Rattus norvegicus PE=3 SV=1 - [M0RA23_RAT]	5.52	2	1	1	1	17.8779	9.0415		0			2.44446	5.52	1	1		0			163
M0RBP6	Uncharacterized protein OS=Rattus norvegicus PE=3 SV=1 - [M0RBP6_RAT]	2.01	2	1	1	1	66.0415	5.90967		0				0			0	2.01	1	1	596
M0RBS0	Uncharacterized protein (Fragment) OS=Rattus norvegicus GN=Slmo2 PE=4 SV=1 - [M0RBS0_RAT]	22.45	2	1	1	1	10.5945	5.87158	3.00141	22.45	1	1		0				0			98
P11915-2	Isoform SCP2 of Non-specific lipid-transfer protein OS=Rattus norvegicus GN=Scp2 - [NLTP_RAT]	5.59	3	1	1	1	15.2879	8.57275	1.90578	5.59	1	1		0				0			143
P20070-3	Isoform 3 of NADH-cytochrome b5 reductase 3 OS=Rattus norvegicus GN=Cyb5r3 - [NB5R3_RAT]	6.47	3	1	1	1	31.5713	8.14795	4.66172	6.47	1	1		0				0			278
Q01728-3	Isoform 3 of Sodium/calcium exchanger 1 OS=Rattus norvegicus GN=Slc8a1 - [NAC1_RAT]	1.07	6	1	1	1	104.091	4.91943		0				0			2.60789	1.07	1	1	935
Q3KR94	Protein Vtn OS=Rattus norvegicus GN=Vtn PE=2 SV=1 - [Q3KR94_RAT]	3.77	1	1	1	1	54.6902	6.04932	2.33792	3.77	1	1		0				0			478
Q6AYG2	DnaJ (Hsp40) homolog, subfamily C, member 28 OS=Rattus norvegicus GN=Dnajc28 PE=2 SV=1 - [Q6AYG2_RAT]	3.39	1	1	1	1	44.4799	8.88037	2.44282	3.39	1	1		0				0			383
Q7TPA1	Ab1-114 OS=Rattus norvegicus GN=Slc25a15 PE=2 SV=1 - [Q7TPA1_RAT]	3.85	1	1	1	1	36.8969	8.96826	0	3.85	1	1		0				0			338

## Sheet: Table S3
Table S3.
This file contains a list of all proteins identified with the PLRP based platform.
Raw data files and database search files are available from the authors upon request.
Accession	Description	ΣCoverage	Σ# Proteins	Σ# Unique Peptides	Σ# Peptides	Σ# PSMs	MW [kDa]	calc. pI	Score A2	Coverage A2	# Peptides A2	# PSM A2	Score B2	Coverage B2	# Peptides B2	# PSM B2	Score C2	Coverage C2	# Peptides C2	# PSM C2	# AAs
G3V6D3	ATP synthase subunit beta OS=Rattus norvegicus GN=Atp5b PE=3 SV=1 - [G3V6D3_RAT]	61.44	2	23	23	3034	56.3095	5.2749	3454.84	53.31	19	1020	2867.86	52.17	19	864	3559.58	52.74	20	1150	529
F1LP05	ATP synthase subunit alpha OS=Rattus norvegicus GN=Atp5a1 PE=2 SV=1 - [F1LP05_RAT]	30.2	2	5	15	2360	59.7757	9.26123	3235.1	26.22	10	1009	1950.88	26.94	12	581	2163.62	25.68	13	770	553
Q05962	ADP/ATP translocase 1 OS=Rattus norvegicus GN=Slc25a4 PE=1 SV=3 - [ADT1_RAT]	36.58	5	4	10	1719	32.9682	9.78857	2101.59	24.83	6	569	1710.4	17.45	4	449	2139.94	32.89	9	701	298
M0R4D7	Uncharacterized protein OS=Rattus norvegicus PE=3 SV=1 - [M0R4D7_RAT]	26.92	1	1	11	1623	51.6642	8.88037	2350.21	19.88	7	734	1553.27	19.88	7	454	1220.94	22.36	10	435	483
P56574	Isocitrate dehydrogenase [NADP], mitochondrial OS=Rattus norvegicus GN=Idh2 PE=1 SV=2 - [IDHP_RAT]	42.48	2	18	18	1509	50.9349	8.68994	2166.59	34.07	13	554	873.219	31.42	12	229	2491.31	42.48	18	726	452
Q5BJZ3	Nicotinamide nucleotide transhydrogenase OS=Rattus norvegicus GN=Nnt PE=2 SV=1 - [Q5BJZ3_RAT]	22.56	1	20	20	1418	113.796	7.88428	1692.28	17.5	14	473	1364.89	15.47	12	395	1753.72	22.56	20	550	1086
P00507	Aspartate aminotransferase, mitochondrial OS=Rattus norvegicus GN=Got2 PE=1 SV=2 - [AATM_RAT]	48.14	3	20	20	1228	47.2841	8.99756	1640.66	42.33	15	473	1308.02	33.72	13	362	1265.21	41.86	19	393	430
M0R6J6	Creatine kinase S-type, mitochondrial OS=Rattus norvegicus GN=Ckmt2 PE=3 SV=1 - [M0R6J6_RAT]	20.15	3	2	8	1019	46.4213	9.49561	1494.48	17.96	7	360	1155.47	15.53	6	269	1482.44	20.15	8	390	412
Q9ER34	Aconitate hydratase, mitochondrial OS=Rattus norvegicus GN=Aco2 PE=1 SV=2 - [ACON_RAT]	42.05	1	27	27	975	85.38	7.82568	1107.76	36.03	20	342	767.204	37.69	22	233	1164.21	42.05	25	400	780
Q9Z2L0	Voltage-dependent anion-selective channel protein 1 OS=Rattus norvegicus GN=Vdac1 PE=1 SV=4 - [VDAC1_RAT]	55.83	5	6	11	952	30.7366	8.54346	1090.94	51.94	9	285	1234.27	55.48	10	321	1270.49	49.12	10	346	283
P04636	Malate dehydrogenase, mitochondrial OS=Rattus norvegicus GN=Mdh2 PE=1 SV=2 - [MDHM_RAT]	49.7	1	13	13	884	35.6608	8.67529	860.377	36.98	9	229	846.613	34.62	8	209	1454.72	46.15	12	446	338
P15650	Long-chain specific acyl-CoA dehydrogenase, mitochondrial OS=Rattus norvegicus GN=Acadl PE=1 SV=1 - [ACADL_RAT]	41.16	1	18	18	795	47.8424	7.73779	1039.85	37.44	14	310	672.119	34.88	13	202	826.808	41.16	16	283	430
P63039	60 kDa heat shock protein, mitochondrial OS=Rattus norvegicus GN=Hspd1 PE=1 SV=1 - [CH60_RAT]	53.23	2	14	20	763	60.9174	6.17627	771.314	38.05	15	246	627.173	40.14	12	158	982.738	46.6	18	359	573
P20788	Cytochrome b-c1 complex subunit Rieske, mitochondrial OS=Rattus norvegicus GN=Uqcrfs1 PE=1 SV=2 - [UCRI_RAT]	31.75	1	7	7	723	29.4272	8.86572	1129.95	31.75	6	335	347.577	31.75	6	108	857.716	31.75	7	280	274
Q64428	Trifunctional enzyme subunit alpha, mitochondrial OS=Rattus norvegicus GN=Hadha PE=1 SV=2 - [ECHA_RAT]	41.28	1	24	24	706	82.6125	9.05615	808.159	29.36	15	204	710.413	34.34	18	181	1104.7	31.98	19	321	763
P13803	Electron transfer flavoprotein subunit alpha, mitochondrial OS=Rattus norvegicus GN=Etfa PE=1 SV=4 - [ETFA_RAT]	39.04	1	9	9	635	34.9295	8.38232	952.739	33.03	7	270	472.732	33.03	7	133	720.259	39.04	9	232	333
Q66HF1	NADH-ubiquinone oxidoreductase 75 kDa subunit, mitochondrial OS=Rattus norvegicus GN=Ndufs1 PE=1 SV=1 - [NDUS1_RAT]	41.27	1	22	22	608	79.3616	5.89697	626.676	29.99	15	179	626.075	31.77	16	172	793.838	41.27	21	257	727
P09605	Creatine kinase S-type, mitochondrial OS=Rattus norvegicus GN=Ckmt2 PE=1 SV=2 - [KCRS_RAT]	38.9	3	6	12	603	47.3553	8.51416	965.534	33.41	9	206	784.826	26.25	7	161	919.569	30.79	10	236	419
P45953	Very long-chain specific acyl-CoA dehydrogenase, mitochondrial OS=Rattus norvegicus GN=Acadvl PE=1 SV=1 - [ACADV_RAT]	49.47	2	28	28	574	70.7046	8.89502	525.99	36.49	16	169	455.678	36.49	15	141	764.358	41.98	23	264	655
P32551	Cytochrome b-c1 complex subunit 2, mitochondrial OS=Rattus norvegicus GN=Uqcrc2 PE=1 SV=2 - [QCR2_RAT]	32.74	1	10	10	546	48.3662	9.14404	600.834	26.99	8	177	411.833	30.75	9	118	817.903	28.98	9	251	452
Q920L2	Succinate dehydrogenase [ubiquinone] flavoprotein subunit, mitochondrial OS=Rattus norvegicus GN=Sdha PE=1 SV=1 - [DHSA_RAT]	38.87	1	16	16	495	71.5697	7.1665	614.854	31.71	12	185	498.746	32.16	12	142	502.944	32.16	14	168	656
G3V9U2	3-ketoacyl-CoA thiolase, mitochondrial OS=Rattus norvegicus GN=Acaa2 PE=4 SV=2 - [G3V9U2_RAT]	49.24	1	1	12	438	41.7575	8.14795	522.356	38.38	8	143	517.389	43.18	9	149	492.031	44.44	11	146	396
P13437	3-ketoacyl-CoA thiolase, mitochondrial OS=Rattus norvegicus GN=Acaa2 PE=2 SV=1 - [THIM_RAT]	46.6	1	1	12	433	41.8445	7.94287	513.9	33.25	7	140	505.886	38.04	8	145	493.129	41.81	11	148	397
P17764	Acetyl-CoA acetyltransferase, mitochondrial OS=Rattus norvegicus GN=Acat1 PE=1 SV=1 - [THIL_RAT]	40.8	1	13	13	399	44.6664	8.76318	396.605	33.02	8	116	344.315	29.95	7	95	562.991	40.8	13	188	424
B0BMW2	3-hydroxyacyl-CoA dehydrogenase type-2 OS=Rattus norvegicus GN=Hsd17b10 PE=2 SV=1 - [B0BMW2_RAT]	59.77	2	11	11	384	27.2325	8.5874	369.062	55.56	9	99	449.544	45.59	7	121	522.524	41	8	164	261
B2GV06	Succinyl-CoA:3-ketoacid coenzyme A transferase 1, mitochondrial OS=Rattus norvegicus GN=Oxct1 PE=1 SV=1 - [SCOT1_RAT]	25.19	1	9	9	383	56.1681	8.47021	463.271	21.54	7	125	538.023	21.54	7	142	371.835	17.69	7	116	520
G3V936	Citrate synthase OS=Rattus norvegicus GN=Cs PE=3 SV=1 - [G3V936_RAT]	21.89	2	8	8	343	51.7975	8.41162	195.845	10.09	4	67	496.532	13.09	4	152	269.632	21.89	8	124	466
Q5XI78	2-oxoglutarate dehydrogenase, mitochondrial OS=Rattus norvegicus GN=Ogdh PE=1 SV=1 - [ODO1_RAT]	26.78	2	21	21	338	116.221	6.771	290.083	19.45	15	94	235.996	21.41	15	75	443.36	23.56	18	169	1023
F1LN88	Aldehyde dehydrogenase, mitochondrial OS=Rattus norvegicus GN=Aldh2 PE=3 SV=2 - [F1LN88_RAT]	22.93	2	9	9	315	56.4807	7.32764	359.169	19.27	7	102	535.604	17.34	6	139	221.599	22.93	9	74	519
P23965	Enoyl-CoA delta isomerase 1, mitochondrial OS=Rattus norvegicus GN=Eci1 PE=1 SV=1 - [ECI1_RAT]	14.19	2	3	3	294	32.234	9.53955	354.023	14.19	3	102	218.051	14.19	3	56	458.459	14.19	3	136	289
F1M2D3	Uncharacterized protein OS=Rattus norvegicus GN=Vdac1 PE=4 SV=2 - [F1M2D3_RAT]	30.14	3	1	6	275	30.7135	8.26514	220.22	26.6	5	60	383.31	30.14	6	99	417.668	30.14	6	116	282
P35435	ATP synthase subunit gamma, mitochondrial OS=Rattus norvegicus GN=Atp5c1 PE=1 SV=2 - [ATPG_RAT]	27.47	3	7	7	261	30.1717	8.83643	180.761	16.48	4	76	99.2981	16.48	4	41	344.511	27.47	7	144	273
P14408-2	Isoform Cytoplasmic of Fumarate hydratase, mitochondrial OS=Rattus norvegicus GN=Fh - [FUMH_RAT]	48.61	2	2	13	255	50.1377	8.19189	267.125	40.69	11	80	212.788	44.11	11	61	368.08	42.18	11	114	467
F1M953	Stress-70 protein, mitochondrial OS=Rattus norvegicus GN=Hspa9 PE=2 SV=1 - [F1M953_RAT]	31.66	3	18	18	252	73.6988	6.16357	306.803	24.59	13	104	211.648	23.86	12	72	240.683	28.87	16	76	679
G3V7I0	Peroxiredoxin 3 OS=Rattus norvegicus GN=Prdx3 PE=4 SV=1 - [G3V7I0_RAT]	30.35	2	5	5	252	28.2815	7.54736	316.531	26.46	4	111	251.321	26.46	4	76	169.381	30.35	5	65	257
P14604	Enoyl-CoA hydratase, mitochondrial OS=Rattus norvegicus GN=Echs1 PE=1 SV=1 - [ECHM_RAT]	39.66	1	6	6	245	31.4962	8.1333	299.859	39.66	6	77	250.367	35.52	5	63	349.377	27.24	5	105	290
G3V8B0	Myosin-7 OS=Rattus norvegicus GN=Myh7 PE=4 SV=1 - [G3V8B0_RAT]	28.11	13	7	42	238	222.762	5.75732	282.283	15.61	22	81	330.208	19.79	29	89	205.241	18.14	25	68	1935
Q5XIH3	NADH dehydrogenase (Ubiquinone) flavoprotein 1 OS=Rattus norvegicus GN=Ndufv1 PE=2 SV=1 - [Q5XIH3_RAT]	45.69	1	12	12	238	50.6986	8.07471	292.779	41.16	10	74	295.382	39.01	9	75	233.057	41.38	11	89	464
Q5M964	Fumarate hydratase 1 OS=Rattus norvegicus GN=Fh PE=2 SV=1 - [Q5M964_RAT]	44.77	1	1	12	234	54.43	8.73389	224.804	37.48	10	70	175.962	40.63	10	52	363.842	34.91	10	112	507
Q68FY0	Cytochrome b-c1 complex subunit 1, mitochondrial OS=Rattus norvegicus GN=Uqcrc1 PE=1 SV=1 - [QCR1_RAT]	27.71	1	9	9	230	52.8154	5.88428	175.901	17.92	6	60	145.653	25.83	8	47	312.848	27.71	9	123	480
Q6P6R2	Dihydrolipoyl dehydrogenase, mitochondrial OS=Rattus norvegicus GN=Dld PE=1 SV=1 - [DLDH_RAT]	43.61	2	16	16	225	54.0041	7.86963	268.571	34.38	11	78	140.205	30.65	10	42	279.816	30.84	13	105	509
P31399	ATP synthase subunit d, mitochondrial OS=Rattus norvegicus GN=Atp5h PE=1 SV=3 - [ATP5H_RAT]	50.93	2	7	7	222	18.7516	6.59521	283.637	44.72	5	93	163.56	44.72	5	55	201.931	37.89	6	74	161
G3V885	Myosin-6 OS=Rattus norvegicus GN=Myh6 PE=4 SV=1 - [G3V885_RAT]	26.56	12	5	40	214	223.371	5.73193	255.022	15.06	21	75	281.458	19.75	29	81	168.888	15.01	21	58	1939
P29419	ATP synthase subunit e, mitochondrial OS=Rattus norvegicus GN=Atp5i PE=1 SV=3 - [ATP5I_RAT]	52.11	1	3	3	213	8.24948	9.34912	369.803	35.21	2	131	153.704	35.21	2	50	96.8874	52.11	3	32	71
Q3KR86	Mitochondrial inner membrane protein (Fragment) OS=Rattus norvegicus GN=Immt PE=1 SV=1 - [IMMT_RAT]	36.29	1	16	16	212	67.1352	5.79541	183.027	27.59	10	52	159.333	31.53	12	47	348.962	32.51	15	113	609
P19511	ATP synthase subunit b, mitochondrial OS=Rattus norvegicus GN=Atp5f1 PE=1 SV=1 - [AT5F1_RAT]	22.27	1	7	7	206	28.8505	9.36377	160.019	16.02	5	50	98.6624	16.02	5	33	345.632	21.88	6	123	256
G3V7J0	Aldehyde dehydrogenase family 6, subfamily A1, isoform CRA_b OS=Rattus norvegicus GN=Aldh6a1 PE=3 SV=1 - [G3V7J0_RAT]	28.22	2	12	12	206	57.7105	8.17725	224.125	17.94	7	58	182.09	26.36	10	53	304.964	25.79	11	95	535
Q6PDU7	ATP synthase subunit g, mitochondrial OS=Rattus norvegicus GN=Atp5l PE=1 SV=2 - [ATP5L_RAT]	27.18	1	2	2	198	11.4261	9.5835	272.063	18.45	1	84	147.005	18.45	1	49	188.733	27.18	2	65	103
F1LX07	Protein Slc25a12 (Fragment) OS=Rattus norvegicus GN=Slc25a12 PE=3 SV=2 - [F1LX07_RAT]	30.67	1	10	12	192	74.1807	8.74854	152.872	22.52	8	51	189.503	24	9	59	233.905	28.15	11	82	675
P08461	Dihydrolipoyllysine-residue acetyltransferase component of pyruvate dehydrogenase complex, mitochondrial OS=Rattus norvegicus GN=Dlat PE=1 SV=3 - [ODP2_RAT]	20.73	2	8	8	191	67.1234	8.52881	226.855	17.09	6	62	186.421	17.09	6	52	227.368	15.03	6	77	632
G3V6H5	Mitochondrial 2-oxoglutarate/malate carrier protein OS=Rattus norvegicus GN=Slc25a11 PE=3 SV=1 - [G3V6H5_RAT]	23.89	2	5	5	185	34.1149	9.96436	184.384	15.92	3	55	161.952	15.92	3	47	270.16	23.89	5	83	314
Q66HF3	Electron transfer flavoprotein-ubiquinone oxidoreductase, mitochondrial OS=Rattus norvegicus GN=Etfdh PE=2 SV=1 - [Q66HF3_RAT]	34.09	2	14	14	176	68.1207	7.56201	161.559	24.19	9	53	170.447	22.4	8	50	186.776	34.09	14	73	616
D3ZG43	NADH dehydrogenase (Ubiquinone) Fe-S protein 3 (Predicted), isoform CRA_c OS=Rattus norvegicus GN=Ndufs3 PE=3 SV=1 - [D3ZG43_RAT]	34.85	1	8	8	175	30.2076	7.53271	178.592	29.92	7	54	128.374	25.76	6	38	268.418	29.55	7	83	264
F1LZW6	Protein Slc25a13 (Fragment) OS=Rattus norvegicus GN=Slc25a13 PE=3 SV=1 - [F1LZW6_RAT]	28	1	9	11	174	74.3358	8.70459	156.716	14.81	5	47	211.991	22.22	8	60	213.181	20.74	8	67	675
P26284	Pyruvate dehydrogenase E1 component subunit alpha, somatic form, mitochondrial OS=Rattus norvegicus GN=Pdha1 PE=1 SV=2 - [ODPA_RAT]	28.46	3	9	9	168	43.1986	8.19189	128.971	15.9	5	44	135.957	17.69	6	49	195.011	28.46	9	75	390
P49432	Pyruvate dehydrogenase E1 component subunit beta, mitochondrial OS=Rattus norvegicus GN=Pdhb PE=1 SV=2 - [ODPB_RAT]	32.59	1	8	8	165	38.957	6.65381	186.327	28.69	6	50	145.105	20.89	5	39	247.13	19.5	5	76	359
Q06647	ATP synthase subunit O, mitochondrial OS=Rattus norvegicus GN=Atp5o PE=1 SV=1 - [ATPO_RAT]	34.74	1	5	5	162	23.3828	10.0229	191.352	22.54	3	51	114.269	30.52	4	33	207.914	34.74	5	78	213
P85834	Elongation factor Tu, mitochondrial OS=Rattus norvegicus GN=Tufm PE=1 SV=1 - [EFTU_RAT]	30.97	1	11	11	158	49.491	7.56201	190.914	27.65	9	58	93.2745	23.45	8	29	198.527	23.01	9	71	452
P10888	Cytochrome c oxidase subunit 4 isoform 1, mitochondrial OS=Rattus norvegicus GN=Cox4i1 PE=1 SV=1 - [COX41_RAT]	39.05	1	7	7	155	19.5021	9.43701	106.439	14.2	2	32	122.486	20.12	3	37	224.197	39.05	7	86	169
P11240	Cytochrome c oxidase subunit 5A, mitochondrial OS=Rattus norvegicus GN=Cox5a PE=1 SV=1 - [COX5A_RAT]	37.67	1	4	4	146	16.1193	6.53662	171.399	10.96	2	46	156.985	31.51	3	44	184.969	17.12	3	56	146
F1LM47	Protein Sucla2 OS=Rattus norvegicus GN=Sucla2 PE=2 SV=1 - [F1LM47_RAT]	41.29	1	13	13	143	50.2742	7.69385	139.446	20.43	6	42	149.852	26.45	7	38	170.334	27.1	9	63	465
P26772	10 kDa heat shock protein, mitochondrial OS=Rattus norvegicus GN=Hspe1 PE=1 SV=3 - [CH10_RAT]	23.53	1	2	2	138	10.8949	8.92432	64.4054	13.73	1	22	119.547	13.73	1	37	225.363	23.53	2	79	102
Q641Y2	NADH dehydrogenase [ubiquinone] iron-sulfur protein 2, mitochondrial OS=Rattus norvegicus GN=Ndufs2 PE=1 SV=1 - [NDUS2_RAT]	27.65	1	9	9	138	52.5276	6.99072	136.029	16.2	4	42	124.986	19.87	5	34	187.969	27.65	9	62	463
Q09073	ADP/ATP translocase 2 OS=Rattus norvegicus GN=Slc25a5 PE=1 SV=3 - [ADT2_RAT]	26.17	4	1	7	134	32.8801	9.72998	102.491	17.45	4	34	123.768	13.76	3	36	195.021	22.48	6	64	298
D3ZUX5	Coiled-coil-helix-coiled-coil-helix domain containing 3 (Predicted), isoform CRA_a OS=Rattus norvegicus GN=Chchd3 PE=4 SV=1 - [D3ZUX5_RAT]	21.59	1	5	5	133	26.4182	8.1333	107.447	17.18	3	35	266.725	6.61	1	75	55.4582	14.98	4	23	227
D3Z9X1	Uncharacterized protein (Fragment) OS=Rattus norvegicus PE=3 SV=2 - [D3Z9X1_RAT]	14.97	1	1	7	132	55.4622	6.81494	159.226	10.94	5	58	50.4507	7.29	3	16	146.023	14.97	7	58	521
P56571	ES1 protein homolog, mitochondrial OS=Rattus norvegicus PE=1 SV=2 - [ES1_RAT]	44.36	1	7	7	130	28.1549	8.92432	169.916	23.31	3	44	134.992	21.8	3	38	167.57	38.72	6	48	266
P15651	Short-chain specific acyl-CoA dehydrogenase, mitochondrial OS=Rattus norvegicus GN=Acads PE=1 SV=2 - [ACADS_RAT]	34.22	2	9	9	128	44.737	8.27979	203.923	24.03	5	51	126.541	24.03	5	33	142.017	34.22	9	44	412
G3V7Y3	ATP synthase subunit delta, mitochondrial OS=Rattus norvegicus GN=Atp5d PE=3 SV=1 - [G3V7Y3_RAT]	13.69	2	2	2	128	17.5522	5.23682	110.09	13.69	2	36	28.8698	8.33	1	10	233.223	13.69	2	82	168
P11507-2	Isoform SERCA2A of Sarcoplasmic/endoplasmic reticulum calcium ATPase 2 OS=Rattus norvegicus GN=Atp2a2 - [AT2A2_RAT]	18.46	10	14	14	127	109.61	5.36377	115.128	7.02	5	37	112.363	11.23	8	40	144.754	13.04	10	50	997
G3V6P2	Dihydrolipoamide S-succinyltransferase (E2 component of 2-oxo-glutarate complex), isoform CRA_a OS=Rattus norvegicus GN=Dlst PE=3 SV=1 - [G3V6P2_RAT]	18.5	2	5	5	126	48.8684	8.70459	216.173	9.69	3	49	170.183	15.86	4	40	128.913	11.67	3	37	454
Q68FU3	Electron transfer flavoprotein subunit beta OS=Rattus norvegicus GN=Etfb PE=2 SV=3 - [ETFB_RAT]	45.49	1	10	10	123	27.6701	7.75244	130.291	34.12	6	40	84.8558	23.92	4	21	169.619	45.49	10	62	255
G3V741	Phosphate carrier protein, mitochondrial OS=Rattus norvegicus GN=Slc25a3 PE=3 SV=1 - [G3V741_RAT]	19.66	2	8	8	123	39.5054	9.26123	90.3609	10.39	3	29	74.9604	10.67	3	24	201.634	19.66	8	70	356
O55171	Acyl-coenzyme A thioesterase 2, mitochondrial OS=Rattus norvegicus GN=Acot2 PE=1 SV=1 - [ACOT2_RAT]	19.43	5	7	7	118	49.6697	7.82568	193.128	17	6	59	149.734	14.35	5	43	40.6643	15.45	5	16	453
Q62651	Delta(3,5)-Delta(2,4)-dienoyl-CoA isomerase, mitochondrial OS=Rattus norvegicus GN=Ech1 PE=1 SV=2 - [ECH1_RAT]	18.04	1	5	5	118	36.1484	7.98682	160.258	15.29	4	51	149.939	14.98	3	54	36.6206	17.74	4	13	327
Q561S0	NADH dehydrogenase [ubiquinone] 1 alpha subcomplex subunit 10, mitochondrial OS=Rattus norvegicus GN=Ndufa10 PE=1 SV=1 - [NDUAA_RAT]	22.82	1	7	7	116	40.4676	7.79639	115.312	13.24	3	36	95.8286	16.62	4	29	148.971	19.44	6	51	355
P18163	Long-chain-fatty-acid--CoA ligase 1 OS=Rattus norvegicus GN=Acsl1 PE=1 SV=1 - [ACSL1_RAT]	20.89	3	12	12	114	78.1282	6.99072	99.4773	10.44	5	30	89.7737	11.87	5	29	145.653	13.45	9	55	699
Q5XIH7	Prohibitin-2 OS=Rattus norvegicus GN=Phb2 PE=1 SV=1 - [PHB2_RAT]	33.44	1	7	7	107	33.2919	9.83252	130.72	33.44	7	45	92.8094	28.09	6	26	108.573	27.09	6	36	299
P00406	Cytochrome c oxidase subunit 2 OS=Rattus norvegicus GN=Mtco2 PE=2 SV=2 - [COX2_RAT]	20.26	2	3	3	106	25.9251	4.729	68.7899	13.22	2	21	98.2382	20.26	3	29	163.964	20.26	3	56	227
Q60587	Trifunctional enzyme subunit beta, mitochondrial OS=Rattus norvegicus GN=Hadhb PE=1 SV=1 - [ECHB_RAT]	20	1	9	9	103	51.3815	9.46631	30.9582	8	3	13	20.4459	5.68	2	7	191.093	20	9	83	475
F1LPV8	Protein Suclg2 OS=Rattus norvegicus GN=Suclg2 PE=2 SV=2 - [F1LPV8_RAT]	23.2	1	6	6	102	46.6095	7.7085	124.855	23.2	6	36	59.1607	16.94	4	18	148.238	20.88	5	48	431
G3V796	Acetyl-Coenzyme A dehydrogenase, medium chain OS=Rattus norvegicus GN=Acadm PE=3 SV=1 - [G3V796_RAT]	17.34	2	6	6	102	46.5418	8.41162	77.6466	9.26	3	28	42.5948	9.26	3	14	167.774	17.34	6	60	421
P11608	ATP synthase protein 8 OS=Rattus norvegicus GN=Mt-atp8 PE=1 SV=1 - [ATP8_RAT]	34.33	3	2	2	101	7.63698	9.31982	59.3529	34.33	2	24	66.2859	19.4	1	24	134.92	34.33	2	53	67
D3ZAF6	ATP synthase subunit f, mitochondrial OS=Rattus norvegicus GN=Atp5j2 PE=1 SV=1 - [ATPK_RAT]	23.86	1	2	2	97	10.4456	10.0376	55.7272	13.64	1	28	56.9562	13.64	1	26	84.8265	23.86	2	43	88
P13086	Succinyl-CoA ligase [ADP/GDP-forming] subunit alpha, mitochondrial OS=Rattus norvegicus GN=Suclg1 PE=2 SV=2 - [SUCA_RAT]	24.86	1	6	6	96	36.125	9.48096	63.9118	8.09	2	20	68.9806	15.03	3	24	123.269	24.86	6	52	346
D4A5L9	Protein LOC690675 OS=Rattus norvegicus GN=LOC690675 PE=3 SV=1 - [D4A5L9_RAT]	27.62	3	3	3	96	11.628	9.5835	154.252	27.62	3	41	138.612	27.62	3	37	24.6251	10.48	1	18	105
F1LXA0	NADH dehydrogenase (Ubiquinone) 1 alpha subcomplex, 12 (Predicted), isoform CRA_b OS=Rattus norvegicus GN=LOC100910710 PE=4 SV=2 - [F1LXA0_RAT]	35.17	1	5	5	94	17.1667	9.70068	69.9697	28.97	4	24	62.8494	28.97	4	24	111.816	23.45	4	46	145
P12075	Cytochrome c oxidase subunit 5B, mitochondrial OS=Rattus norvegicus GN=Cox5b PE=1 SV=2 - [COX5B_RAT]	17.83	1	2	2	91	13.9059	7.78174	10.53	9.3	1	5	4.98144	9.3	1	3	171.131	17.83	2	83	129
Q9JM53	Apoptosis-inducing factor 1, mitochondrial OS=Rattus norvegicus GN=Aifm1 PE=1 SV=1 - [AIFM1_RAT]	25.49	1	13	13	90	66.6808	8.96826	84.3103	19.93	9	29	49.3409	16.01	8	17	114.448	18.63	9	44	612
P29266	3-hydroxyisobutyrate dehydrogenase, mitochondrial OS=Rattus norvegicus GN=Hibadh PE=1 SV=3 - [3HIDH_RAT]	22.99	1	5	5	89	35.2796	8.47021	85.5285	17.61	4	29	74.1756	22.99	5	27	99.7813	17.61	4	33	335
P21571	ATP synthase-coupling factor 6, mitochondrial OS=Rattus norvegicus GN=Atp5j PE=1 SV=1 - [ATP5J_RAT]	39.81	1	5	5	88	12.4866	9.43701	125.951	39.81	4	26	80.6359	39.81	4	17	193.457	30.56	4	45	108
D3ZZ21	NADH dehydrogenase (Ubiquinone) 1 beta subcomplex, 6 (Predicted) OS=Rattus norvegicus GN=Ndufb6 PE=4 SV=1 - [D3ZZ21_RAT]	26.56	1	2	2	83	15.6283	10.0376	79.6821	14.06	1	29	105.898	14.06	1	34	46.9425	26.56	2	20	128
D3ZS58	NADH dehydrogenase [ubiquinone] 1 alpha subcomplex subunit 2 OS=Rattus norvegicus GN=Ndufa2 PE=3 SV=1 - [D3ZS58_RAT]	14.43	1	1	1	80	10.8378	9.71533	96.1477	14.43	1	32	76.1852	14.43	1	22	83.6295	14.43	1	26	97
F1LNF7	Isocitrate dehydrogenase [NAD] subunit alpha, mitochondrial OS=Rattus norvegicus GN=Idh3a PE=2 SV=1 - [F1LNF7_RAT]	18.85	2	5	5	80	39.557	6.91748	60.8764	13.39	3	20	38.5663	10.38	2	12	121.746	18.85	5	48	366
P62738	Actin, aortic smooth muscle OS=Rattus norvegicus GN=Acta2 PE=2 SV=1 - [ACTA_RAT]	25.46	5	3	7	79	41.9818	5.38916	39.6291	18.3	5	13	33.3308	15.38	4	12	123.586	25.46	7	54	377
Q68FZ8	Propionyl coenzyme A carboxylase, beta polypeptide OS=Rattus norvegicus GN=Pccb PE=2 SV=1 - [Q68FZ8_RAT]	27.17	1	1	10	79	58.6411	7.84033	85.4569	22.92	8	23	65.4021	25.32	9	20	102.213	17.19	7	36	541
P07633	Propionyl-CoA carboxylase beta chain, mitochondrial OS=Rattus norvegicus GN=Pccb PE=2 SV=1 - [PCCB_RAT]	28.1	1	1	10	78	58.589	7.47412	81.6939	20.15	7	22	65.3884	26.25	9	20	102.213	17.19	7	36	541
Q68FT1	Ubiquinone biosynthesis protein COQ9, mitochondrial OS=Rattus norvegicus GN=Coq9 PE=2 SV=2 - [COQ9_RAT]	23.4	1	5	5	78	35.1235	5.77002	75.1451	12.82	3	23	38.3673	9.62	2	13	109.284	23.4	5	42	312
Q5BK63	NADH dehydrogenase [ubiquinone] 1 alpha subcomplex subunit 9, mitochondrial OS=Rattus norvegicus GN=Ndufa9 PE=1 SV=2 - [NDUA9_RAT]	34.48	1	10	10	73	42.5323	9.81787	90.0934	22.55	6	26	61.2297	21.49	5	19	77.5783	29.44	9	28	377
P05508	NADH-ubiquinone oxidoreductase chain 4 OS=Rattus norvegicus GN=Mtnd4 PE=2 SV=2 - [NU4M_RAT]	11.98	2	4	4	72	51.7655	9.40771	39.2184	7.19	2	11	52.1832	9.8	3	17	141.093	11.98	4	44	459
P60711	Actin, cytoplasmic 1 OS=Rattus norvegicus GN=Actb PE=1 SV=1 - [ACTB_RAT]	21.33	3	2	6	69	41.7097	5.47803	36.6904	18.4	5	12	26.5743	12	3	9	110.204	21.33	6	48	375
Q9R1Z0	Voltage-dependent anion-selective channel protein 3 OS=Rattus norvegicus GN=Vdac3 PE=1 SV=2 - [VDAC3_RAT]	27.56	2	5	6	67	30.7784	8.70459	63.6889	19.08	4	20	49.3422	19.08	4	16	87.2383	27.56	6	31	283
Q5XIF3	NADH dehydrogenase [ubiquinone] iron-sulfur protein 4, mitochondrial OS=Rattus norvegicus GN=Ndufs4 PE=1 SV=1 - [NDUS4_RAT]	25.71	1	4	4	66	19.7282	10.1401	32.8311	8.57	1	10	46.829	8.57	1	15	113.225	25.71	4	41	175
D3ZE29	Uncharacterized protein (Fragment) OS=Rattus norvegicus PE=3 SV=2 - [D3ZE29_RAT]	13.06	3	1	4	64	34.4768	9.34912	54.992	7.96	2	19	60.5835	7.96	2	19	71.5052	13.06	4	26	314
Q5U1W6	Apolipoprotein O-like OS=Rattus norvegicus GN=Apool PE=2 SV=1 - [Q5U1W6_RAT]	33.86	1	5	5	64	28.2196	9.01221	62.5713	33.86	5	18	55.9353	27.95	4	14	116.284	33.86	5	32	254
Q5PQZ9	NADH dehydrogenase [ubiquinone] 1 subunit C2 OS=Rattus norvegicus GN=Ndufc2 PE=2 SV=1 - [Q5PQZ9_RAT]	11.67	1	2	2	62	14.3493	9.39307	50.7201	11.67	2	17	50.3541	11.67	2	17	95.6045	11.67	2	28	120
P67779	Prohibitin OS=Rattus norvegicus GN=Phb PE=1 SV=1 - [PHB_RAT]	34.19	4	6	6	60	29.8019	5.75732	45.8766	20.59	4	21	33.7124	21.69	4	12	65.007	18.01	4	27	272
Q704S8	Carnitine O-acetyltransferase OS=Rattus norvegicus GN=Crat PE=1 SV=1 - [CACP_RAT]	14.54	1	6	6	59	70.7553	8.54346	53.5632	12.78	5	18	50.2234	12.78	5	18	69.5607	12.14	5	23	626
Q63362	NADH dehydrogenase [ubiquinone] 1 alpha subcomplex subunit 5 OS=Rattus norvegicus GN=Ndufa5 PE=1 SV=3 - [NDUA5_RAT]	34.48	1	3	3	58	13.4033	7.43018	31.2054	34.48	2	10	102.296	34.48	3	25	80.1859	34.48	2	23	116
P02091	Hemoglobin subunit beta-1 OS=Rattus norvegicus GN=Hbb PE=1 SV=3 - [HBB1_RAT]	36.73	3	2	4	58	15.9692	8.07471	23.0176	21.09	2	8	48.2003	21.09	2	15	100.669	23.81	3	35	147
P19234	NADH dehydrogenase [ubiquinone] flavoprotein 2, mitochondrial OS=Rattus norvegicus GN=Ndufv2 PE=1 SV=2 - [NDUV2_RAT]	28.63	1	6	6	58	27.3609	6.68311	92.8446	15.32	3	30	31.4819	14.92	3	9	52.5851	28.63	6	19	248
M0R776	Protein Mrps36 OS=Rattus norvegicus GN=Mrps36 PE=4 SV=1 - [M0R776_RAT]	28.16	2	2	2	58	11.406	10.3452	14.7816	28.16	2	5	25.776	28.16	2	8	125.291	28.16	2	45	103
P35171	Cytochrome c oxidase subunit 7A2, mitochondrial OS=Rattus norvegicus GN=Cox7a2 PE=1 SV=1 - [CX7A2_RAT]	27.71	1	2	2	57	9.34695	10.272	45.7879	15.66	1	14	39.7681	15.66	1	12	95.6935	27.71	2	31	83
D3ZE15	Protein LOC100911483 OS=Rattus norvegicus GN=Ndufa13 PE=4 SV=1 - [D3ZE15_RAT]	59.03	2	7	7	56	16.7657	9.48096	47.2585	16.67	2	17	13.6933	30.56	3	6	76.0712	47.92	6	33	144
F1LPG5	Protein LOC691675 OS=Rattus norvegicus GN=LOC688963 PE=2 SV=1 - [F1LPG5_RAT]	37.98	5	3	3	56	15.055	9.81787	73.7945	27.91	2	20	59.1739	19.38	1	17	53.0761	37.98	3	19	129
A9UMV9	Ndufa7 protein OS=Rattus norvegicus GN=Ndufa7 PE=4 SV=1 - [A9UMV9_RAT]	27.68	1	3	3	55	12.4926	10.4771	32.867	19.64	2	13	25.8372	9.82	1	11	64.0397	27.68	3	31	112
P81155	Voltage-dependent anion-selective channel protein 2 OS=Rattus norvegicus GN=Vdac2 PE=1 SV=2 - [VDAC2_RAT]	27.46	2	5	6	53	31.7256	7.48877	63.455	27.12	5	19	77.7105	27.12	5	24	33.8591	20	5	10	295
Q499N5	Acyl-CoA synthetase family member 2, mitochondrial OS=Rattus norvegicus GN=Acsf2 PE=2 SV=1 - [ACSF2_RAT]	23.41	1	9	9	52	67.8429	8.11865	27.7251	10.89	3	7	26.4453	13.5	4	7	116.41	23.41	9	38	615
D3ZEN5	Peroxiredoxin-5, mitochondrial (Fragment) OS=Rattus norvegicus GN=Prdx5 PE=2 SV=2 - [D3ZEN5_RAT]	51.55	3	5	5	52	16.9149	7.23975	32.8268	40.99	4	11	48.26	43.48	4	17	64.9621	26.71	3	24	161
P11517	Hemoglobin subunit beta-2 OS=Rattus norvegicus PE=1 SV=2 - [HBB2_RAT]	26.53	3	1	3	50	15.9723	8.79248	21.8258	19.73	2	8	38.4759	8.16	1	13	84.9784	26.53	3	29	147
Q5RJN0	NADH dehydrogenase (Ubiquinone) Fe-S protein 7 OS=Rattus norvegicus GN=Ndufs7 PE=2 SV=1 - [Q5RJN0_RAT]	30.73	1	5	5	50	23.9294	9.99365	40.818	16.06	2	11	62.1071	15.6	2	18	55.5957	30.73	5	21	218
D3ZCZ9	Protein LOC100912599 OS=Rattus norvegicus GN=LOC100912599 PE=4 SV=1 - [D3ZCZ9_RAT]	43.1	3	4	4	48	13.0317	9.21729	22.9501	12.93	1	9	37.861	33.62	3	14	70.4397	22.41	2	25	116
P14882	Propionyl-CoA carboxylase alpha chain, mitochondrial OS=Rattus norvegicus GN=Pcca PE=1 SV=3 - [PCCA_RAT]	19	1	1	10	47	81.5711	7.69385	60.1123	11.94	6	16	47.2581	9.63	5	14	46.4563	9.09	5	17	737
D3ZFQ8	Cytochrome c-1 (Predicted), isoform CRA_b OS=Rattus norvegicus GN=Cyc1 PE=4 SV=2 - [D3ZFQ8_RAT]	5.53	1	1	1	47	23.006	10.272	29.7296	5.53	1	11	12.695	5.53	1	5	81.3166	5.53	1	31	217
D4A565	NADH dehydrogenase (Ubiquinone) 1 beta subcomplex, 5 (Predicted), isoform CRA_b OS=Rattus norvegicus GN=Ndufb5 PE=4 SV=1 - [D4A565_RAT]	12.7	1	2	2	46	21.6505	9.46631	30.9734	5.82	1	11	17.9975	12.7	2	6	73.4299	12.7	2	29	189
P07895	Superoxide dismutase [Mn], mitochondrial OS=Rattus norvegicus GN=Sod2 PE=1 SV=2 - [SODM_RAT]	21.17	1	3	3	44	24.6586	8.80713	39.7291	21.17	3	14	35.1366	21.17	3	12	53.8729	21.17	3	18	222
P10860	Glutamate dehydrogenase 1, mitochondrial OS=Rattus norvegicus GN=Glud1 PE=1 SV=2 - [DHE3_RAT]	17.74	1	8	8	44	61.3773	8.00146	18.0973	13.26	5	6	38.1474	12.72	4	10	73.8588	17.74	8	28	558
G3V945	Aldehyde dehydrogenase family 5, subfamily A1 OS=Rattus norvegicus GN=Aldh5a1 PE=3 SV=1 - [G3V945_RAT]	14.72	4	6	6	43	56.1099	8.08936	34.343	12.81	5	11	30.2261	10.71	4	10	58.4108	14.72	6	22	523
F1M8L5	Propionyl-CoA carboxylase alpha chain, mitochondrial OS=Rattus norvegicus GN=Pcca PE=2 SV=2 - [F1M8L5_RAT]	21.73	2	1	10	42	69.1864	7.21045	63.2074	15.81	7	17	27.899	8.95	4	8	46.4563	10.7	5	17	626
Q641Z9	Protein Sdhc OS=Rattus norvegicus GN=Sdhc PE=2 SV=1 - [Q641Z9_RAT]	17.16	1	2	2	42	18.1907	10.2134	37.287	17.16	2	14	30.0947	17.16	2	11	45.8089	17.16	2	17	169
Q5XIC0	Enoyl-CoA delta isomerase 2, mitochondrial OS=Rattus norvegicus GN=Eci2 PE=1 SV=1 - [ECI2_RAT]	13.04	1	4	4	40	42.994	8.98291	30.1653	6.65	2	9	31.034	9.97	3	10	65.5795	13.04	4	21	391
Q2TA68	Dynamin-like 120 kDa protein, mitochondrial OS=Rattus norvegicus GN=Opa1 PE=1 SV=1 - [OPA1_RAT]	19.06	4	13	13	40	111.238	7.53271	34.7441	6.25	4	9	51.1838	11.25	7	14	52.3569	11.88	8	17	960
D4A0T0	Protein Ndufb10 OS=Rattus norvegicus GN=Ndufb10 PE=4 SV=1 - [D4A0T0_RAT]	33.52	2	5	5	39	20.8454	7.69385	56.8895	14.77	2	17	34.3902	33.52	5	10	34.7886	22.73	4	12	176
P16409	Myosin light chain 3 OS=Rattus norvegicus GN=Myl3 PE=2 SV=2 - [MYL3_RAT]	36.5	1	5	5	37	22.1421	5.09717	32.8505	28.5	4	10	36.9047	30	4	11	48.6614	36.5	5	16	200
Q63704	Carnitine O-palmitoyltransferase 1, muscle isoform OS=Rattus norvegicus GN=Cpt1b PE=1 SV=1 - [CPT1B_RAT]	9.97	1	6	6	37	88.1592	8.60205	35.6504	6.87	4	12	26.351	6.87	4	10	41.8592	6.48	4	15	772
Q5U1Z9	Metaxin 2 OS=Rattus norvegicus GN=Mtx2 PE=2 SV=1 - [Q5U1Z9_RAT]	12.55	1	3	3	37	29.699	5.33838	47.3625	9.13	2	17					51.5784	12.55	3	20	263
G3V9Z3	Amine oxidase [flavin-containing] A OS=Rattus norvegicus GN=Maoa PE=4 SV=1 - [G3V9Z3_RAT]	16.73	2	6	6	36	59.4827	7.92822	34.1355	8.75	3	12	21.6715	11.79	4	7	48.203	13.12	5	17	526
P10817	Cytochrome c oxidase subunit 6A2, mitochondrial (Fragment) OS=Rattus norvegicus GN=Cox6a2 PE=1 SV=3 - [CX6A2_RAT]	12.77	2	1	1	35	10.4803	9.0708	19.746	12.77	1	10	8.30839	12.77	1	5	37.8136	12.77	1	20	94
Q5XIN6	LETM1 and EF-hand domain-containing protein 1, mitochondrial OS=Rattus norvegicus GN=Letm1 PE=1 SV=1 - [LETM1_RAT]	25.85	1	13	13	35	83.0079	6.59521	31.9456	15.16	7	10	37.719	15.7	8	12	36.6708	11.64	6	13	739
B0K020	CDGSH iron-sulfur domain-containing protein 1 OS=Rattus norvegicus GN=Cisd1 PE=3 SV=1 - [CISD1_RAT]	25.93	1	2	2	34	12.0891	8.83643	43.8005	25.93	2	12	34.5013	25.93	2	9	49.845	25.93	2	13	108
G3V734	2,4-dienoyl CoA reductase 1, mitochondrial, isoform CRA_a OS=Rattus norvegicus GN=Decr1 PE=4 SV=1 - [G3V734_RAT]	17.91	2	5	5	33	36.1097	8.93896	29.5002	14.93	3	8	38.6157	14.93	4	11	35.9424	13.73	4	14	335
P46462	Transitional endoplasmic reticulum ATPase OS=Rattus norvegicus GN=Vcp PE=1 SV=3 - [TERA_RAT]	9.06	1	5	5	32	89.2927	5.26221	21.8596	3.47	2	6	37.9113	5.96	3	11	49.2766	9.06	5	15	806
D3ZLT1	NADH dehydrogenase (Ubiquinone) 1 beta subcomplex, 7 (Predicted) OS=Rattus norvegicus GN=Ndufb7 PE=4 SV=1 - [D3ZLT1_RAT]	9.49	1	1	1	32	16.5572	8.45557	44.5781	9.49	1	15	28.9858	9.49	1	9	26.3674	9.49	1	8	137
P05708	Hexokinase-1 OS=Rattus norvegicus GN=Hk1 PE=1 SV=4 - [HXK1_RAT]	6.54	2	5	5	28	102.342	6.7124	21.1838	5.23	4	7	28.1334	5.34	4	10	26.662	4.03	3	11	918
Q5XIT9	Methylcrotonoyl-CoA carboxylase beta chain, mitochondrial OS=Rattus norvegicus GN=Mccc2 PE=2 SV=1 - [MCCB_RAT]	19.18	1	6	6	28	61.4784	8.30908	29.2529	12.26	4	10	39.5788	12.26	4	10	27.416	12.43	4	8	563
G3V7N5	Carnitine O-palmitoyltransferase 2, mitochondrial OS=Rattus norvegicus GN=Cpt2 PE=3 SV=1 - [G3V7N5_RAT]	10.64	2	6	6	27	74.0314	7.45947	17.7527	7.29	4	8	19.4305	5.78	3	7	31.8705	7.29	4	12	658
Q8SEZ0	NADH-ubiquinone oxidoreductase chain 5 OS=Rattus norvegicus GN=Mt-nd5 PE=3 SV=1 - [Q8SEZ0_RAT]	5.75	2	3	3	27	68.5719	9.26123	6.07655	2.13	1	2	5.39701	3.94	2	2	58.459	5.75	3	23	609
Q4V8F9	Hydroxysteroid dehydrogenase-like protein 2 OS=Rattus norvegicus GN=Hsdl2 PE=2 SV=1 - [HSDL2_RAT]	16.79	1	6	6	26	58.3069	6.18896	27.6141	12.4	4	10	17.7407	8.78	3	7	26.5121	14.69	5	9	524
B0BN52	Mitochondrial carrier homolog 2 (C. elegans) OS=Rattus norvegicus GN=Mtch2 PE=2 SV=1 - [B0BN52_RAT]	14.85	1	3	3	26	33.506	8.25049	2.66564	5.28	1	1	15.8844	5.28	1	5	57.0393	14.85	3	20	303
B0BNE6	NADH dehydrogenase (Ubiquinone) Fe-S protein 8 (Predicted), isoform CRA_a OS=Rattus norvegicus GN=Ndufs8 PE=2 SV=1 - [B0BNE6_RAT]	12.74	1	2	2	26	23.9547	6.21436	43.8404	8.49	1	10	34.5355	8.49	1	8	30.9357	12.74	2	8	212
B2RYW3	NADH dehydrogenase (Ubiquinone) 1 beta subcomplex, 9 OS=Rattus norvegicus GN=Ndufb9 PE=2 SV=1 - [B2RYW3_RAT]	11.17	1	1	1	26	21.8778	8.07471	55.2439	11.17	1	15	22.269	11.17	1	5	22.3058	11.17	1	6	179
D3ZD09	Cytochrome c oxidase subunit 6B1 OS=Rattus norvegicus GN=Cox6b1 PE=4 SV=1 - [D3ZD09_RAT]	23.26	1	2	2	26	10.0649	8.71924	10.6321	10.47	1	5					40.6135	23.26	2	21	86
P0C546	Mitochondrial coenzyme A transporter SLC25A42 OS=Rattus norvegicus GN=Slc25a42 PE=2 SV=1 - [S2542_RAT]	17.3	1	3	3	25	35.0775	9.86182	25.9402	10.38	2	7	12.2281	5.35	1	3	50.1151	12.26	2	15	318
P06685	Sodium/potassium-transporting ATPase subunit alpha-1 OS=Rattus norvegicus GN=Atp1a1 PE=1 SV=1 - [AT1A1_RAT]	10.46	9	7	7	23	112.982	5.45264	9.49407	4.3	3	4	23.7786	6.26	4	7	34.6479	2.54	2	12	1023
Q9WVK7	Hydroxyacyl-coenzyme A dehydrogenase, mitochondrial OS=Rattus norvegicus GN=Hadh PE=2 SV=1 - [HCDH_RAT]	28.34	1	5	5	23	34.4259	8.76318	8.61863	9.55	1	3	15.3807	18.79	2	4	30.784	9.55	3	16	314
Q68FX0	Isocitrate dehydrogenase [NAD] subunit beta, mitochondrial OS=Rattus norvegicus GN=Idh3B PE=1 SV=1 - [IDH3B_RAT]	23.64	1	6	6	23	42.3268	8.74854	17.9762	15.06	4	6	25.0594	12.99	3	9	19.0245	16.88	4	8	385
B1WC61	Acad9 protein OS=Rattus norvegicus GN=Acad9 PE=2 SV=1 - [B1WC61_RAT]	9.6	1	5	5	22	68.7997	7.69385	6.45659	5.76	3	3	17.7203	6.08	3	7	29.3807	5.76	3	12	625
P29410-2	Isoform 2 of Adenylate kinase 2, mitochondrial OS=Rattus norvegicus GN=Ak2 - [KAD2_RAT]	9.91	2	2	2	22	25.5141	6.80029	11.9982	5.6	1	4	14.7473	5.6	1	5	37.7811	9.91	2	13	232
P24473	Glutathione S-transferase kappa 1 OS=Rattus norvegicus GN=Gstk1 PE=1 SV=3 - [GSTK1_RAT]	13.27	1	2	2	20	25.4763	9.0708	2.83313	7.08	1	1	6.97069	13.27	2	2	60.2769	6.19	1	17	226
P21913	Succinate dehydrogenase [ubiquinone] iron-sulfur subunit, mitochondrial OS=Rattus norvegicus GN=Sdhb PE=2 SV=2 - [DHSB_RAT]	11.7	1	3	3	20	31.8089	8.67529	15.2828	11.7	3	6	6.96578	7.8	2	3	27.9439	11.7	3	11	282
F1LP30	Methylcrotonoyl-CoA carboxylase subunit alpha, mitochondrial OS=Rattus norvegicus GN=Mccc1 PE=2 SV=1 - [F1LP30_RAT]	12.45	2	6	6	20	79.2454	7.13721	19.004	3.92	2	6	17.3144	5.45	3	6	19.8153	10.91	5	8	715
P01946	Hemoglobin subunit alpha-1/2 OS=Rattus norvegicus GN=Hba1 PE=1 SV=3 - [HBA_RAT]	34.51	1	3	3	19	15.3188	7.97217	17.4802	26.06	2	4	17.195	26.06	2	5	37.4074	34.51	3	10	142
P38718-2	Isoform Short of Mitochondrial pyruvate carrier 2 OS=Rattus norvegicus GN=Mpc2 - [MPC2_RAT]	20.69	2	3	3	19	12.9599	10.77	3.1805	9.48	1	1	2.62342	9.48	1	1	49.6866	20.69	3	17	116
Q6P2A5	Adenylate kinase 3 OS=Rattus norvegicus GN=Ak3 PE=2 SV=1 - [Q6P2A5_RAT]	18.94	2	3	3	19	25.4785	8.85107	33.3874	18.94	3	10	17.9758	18.94	3	5	14.3241	12.78	2	4	227
Q5XIJ3	Isocitrate dehydrogenase 3 (NAD), gamma OS=Rattus norvegicus GN=Idh3g PE=2 SV=1 - [Q5XIJ3_RAT]	17.3	2	3	3	19	42.8232	9.01221					39.8687	17.3	3	10	30.8738	17.3	3	9	393
Q924S5	Lon protease homolog, mitochondrial OS=Rattus norvegicus GN=Lonp1 PE=2 SV=1 - [LONM_RAT]	16.21	1	7	7	18	105.726	6.59521	21.8065	8	3	7	39.4774	16.21	7	11					950
F1LM33	Leucine-rich PPR motif-containing protein, mitochondrial OS=Rattus norvegicus GN=Lrpprc PE=4 SV=2 - [F1LM33_RAT]	7.97	2	8	8	18	156.581	6.60986	24.7371	4.09	4	7	8.90502	1.15	1	2	23.4175	6.25	6	9	1392
M0R570	5-hydroxytryptamine receptor 2B OS=Rattus norvegicus GN=Srl PE=4 SV=1 - [M0R570_RAT]	11.02	2	3	3	18	54.2701	6.63916	23.7541	7.63	2	6	19.6944	6.99	2	5	22.6003	3.6	1	7	472
D4A3V2	NADH dehydrogenase [ubiquinone] 1 alpha subcomplex subunit 6 OS=Rattus norvegicus GN=Ndufa6 PE=3 SV=1 - [D4A3V2_RAT]	26.92	1	3	3	17	15.2141	10.1548	2.3061	12.31	1	1	7.33434	20.77	2	3	27.9282	26.92	3	13	130
P97521	Mitochondrial carnitine/acylcarnitine carrier protein OS=Rattus norvegicus GN=Slc25a20 PE=1 SV=1 - [MCAT_RAT]	21.93	2	5	5	16	33.1322	9.48096	8.63431	7.64	1	3	4.79708	7.64	1	2	23.3919	21.93	5	11	301
P12007	Isovaleryl-CoA dehydrogenase, mitochondrial OS=Rattus norvegicus GN=Ivd PE=1 SV=2 - [IVD_RAT]	18.4	1	6	6	16	46.4058	7.89893	2.40291	2.59	1	1	12.2556	8.25	2	4	26.4836	12.5	5	11	424
D3ZT90	Glutaryl-Coenzyme A dehydrogenase (Predicted) OS=Rattus norvegicus GN=Gcdh PE=3 SV=1 - [D3ZT90_RAT]	6.71	1	2	2	16	49.6815	8.71924	33.0528	3.13	1	9	18.6457	3.13	1	5	7.02544	3.58	1	2	447
P04692	Tropomyosin alpha-1 chain OS=Rattus norvegicus GN=Tpm1 PE=1 SV=3 - [TPM1_RAT]	16.9	16	5	5	15	32.6607	4.7417	15.2686	9.51	3	5	7.63465	3.52	1	3	13.7055	8.45	2	7	284
D4A197	Methylmalonyl CoA epimerase (Predicted), isoform CRA_d OS=Rattus norvegicus GN=Mcee PE=4 SV=1 - [D4A197_RAT]	17.98	1	2	2	15	18.8039	8.82178	21.0709	10.67	1	6	20.242	10.67	1	5	10.3964	17.98	2	4	178
F1LMM8	[Pyruvate dehydrogenase [lipoamide]] kinase isozyme 2, mitochondrial OS=Rattus norvegicus GN=Pdk2 PE=2 SV=2 - [F1LMM8_RAT]	7.4	2	2	2	15	43.9902	7.35693	16.4777	7.4	2	6	14.6625	7.4	2	5	12.6147	7.4	2	4	392
G3V8U8	Branched-chain-amino-acid aminotransferase OS=Rattus norvegicus GN=Bcat2 PE=3 SV=1 - [G3V8U8_RAT]	8.4	2	2	2	15	44.2009	8.1626	22.1445	8.4	2	6	8.51672	8.4	2	3	17.8346	8.4	2	6	393
Q5BJQ0	Chaperone activity of bc1 complex-like, mitochondrial OS=Rattus norvegicus GN=Adck3 PE=2 SV=1 - [ADCK3_RAT]	8.01	1	3	3	14	72.1797	6.45557	7.84283	4.31	2	3	7.40889	4.31	2	3	19.5932	8.01	3	8	649
G3V640	Mitochondrial import inner membrane translocase subunit TIM44 OS=Rattus norvegicus GN=Timm44 PE=4 SV=1 - [G3V640_RAT]	10.6	2	4	4	14	51.0284	8.30908	15.1793	7.95	3	5	10.0906	5.3	2	3	15.3094	7.95	3	6	453
G3V7K6	Single-stranded DNA-binding protein OS=Rattus norvegicus GN=Ssbp1 PE=3 SV=1 - [G3V7K6_RAT]	13.51	2	2	2	14	17.1599	9.83252	11.8123	13.51	2	3	22.9569	13.51	2	5	24.1418	13.51	2	6	148
M0R5K3	Protein LOC100910772 OS=Rattus norvegicus GN=LOC100910772 PE=4 SV=1 - [M0R5K3_RAT]	16.25	2	1	1	14	9.02169	10.0083	3.24459	16.25	1	1	15.7702	16.25	1	5	25.8716	16.25	1	8	80
Q5M9I5	Cytochrome b-c1 complex subunit 6, mitochondrial OS=Rattus norvegicus GN=Uqcrh PE=3 SV=1 - [QCR6_RAT]	16.85	1	1	1	13	10.417	4.97021	25.8	16.85	1	7	23.9044	16.85	1	6					89
Q63159	Hexaprenyldihydroxybenzoate methyltransferase, mitochondrial OS=Rattus norvegicus GN=Coq3 PE=2 SV=2 - [COQ3_RAT]	13.91	1	3	3	13	38.6836	7.97217	12.5144	9.57	2	4	10.4745	9.57	2	4	12.8101	8.99	2	5	345
B5DEL8	NADH dehydrogenase (Ubiquinone) Fe-S protein 5 OS=Rattus norvegicus GN=Ndufs5 PE=4 SV=1 - [B5DEL8_RAT]	23.58	2	2	2	13	12.6915	8.92432	8.34857	12.26	1	3	12.8204	23.58	2	5	12.9626	12.26	1	5	106
D4A8P9	Protein Iars2 OS=Rattus norvegicus GN=Iars2 PE=3 SV=2 - [D4A8P9_RAT]	7.01	1	2	2	13	48.6503	7.35693	3.33943	3.85	1	1	2.87147	3.85	1	1	28.8156	3.17	1	11	442
M0R7V3	Protein Apoo OS=Rattus norvegicus GN=Apoo PE=4 SV=1 - [M0R7V3_RAT]	6.71	2	1	1	13	18.8116	8.35303	8.11384	6.71	1	3					24.8274	6.71	1	10	164
Q5RK08	Glioblastoma amplified sequence OS=Rattus norvegicus GN=Gbas PE=2 SV=1 - [Q5RK08_RAT]	4.98	1	1	1	13	32.9209	9.36377	17.2249	4.98	1	4	17.9625	4.98	1	5	13.1622	4.98	1	4	281
Q7TQ85	Ac1164 OS=Rattus norvegicus GN=Pdhx PE=2 SV=1 - [Q7TQ85_RAT]	13.54	1	4	4	13	58.7599	8.52881	9.65097	10.95	3	4	12.8913	10.02	3	5	5.23712	7.42	2	4	539
D4A4P3	Protein LOC100361144 OS=Rattus norvegicus GN=LOC100361144 PE=4 SV=1 - [D4A4P3_RAT]	11.11	2	1	1	13	11.2596	9.0415									28.7269	11.11	1	13	99
Q5XHZ0	Heat shock protein 75 kDa, mitochondrial OS=Rattus norvegicus GN=Trap1 PE=1 SV=1 - [TRAP1_RAT]	5.38	3	2	3	12	80.4108	7.03467	18.0546	3.68	2	6	7.41094	5.38	3	3	4.50622	3.68	2	3	706
B2RYS8	NADH dehydrogenase (Ubiquinone) 1 beta subcomplex 8 OS=Rattus norvegicus GN=Ndufb8 PE=2 SV=1 - [B2RYS8_RAT]	23.12	1	3	3	12	21.9444	6.04932	8.15971	8.06	1	2	7.39764	8.06	1	2	23.9518	23.12	3	8	186
B2RYU0	NADH dehydrogenase (Ubiquinone) 1 beta subcomplex, 2 (Predicted), isoform CRA_b OS=Rattus norvegicus GN=Ndufb2 PE=4 SV=1 - [B2RYU0_RAT]	18.1	1	1	1	12	11.8349	6.3667	23.6694	18.1	1	6	11.3828	18.1	1	3	10.2868	18.1	1	3	105
M0RBL9	Protein Vwa8 (Fragment) OS=Rattus norvegicus GN=Vwa8 PE=4 SV=1 - [M0RBL9_RAT]	11	2	3	6	12	78.9472	6.88818	5.40755	1.71	1	2	5.71842	2.43	1	2	18.2504	8.57	5	8	700
Q9JLJ3	4-trimethylaminobutyraldehyde dehydrogenase OS=Rattus norvegicus GN=Aldh9a1 PE=1 SV=1 - [AL9A1_RAT]	2.02	1	1	1	11	53.618	6.91748	6.91973	2.02	1	3	4.69028	2.02	1	2	14.1477	2.02	1	6	494
D3ZZN3	Protein Acss1 OS=Rattus norvegicus GN=Acss1 PE=4 SV=1 - [D3ZZN3_RAT]	10.12	1	4	4	11	74.8439	6.85889	2.65	1.61	1	1	14.7514	8.65	3	4	21.2852	5.72	2	6	682
Q03344	ATPase inhibitor, mitochondrial OS=Rattus norvegicus GN=Atpif1 PE=3 SV=2 - [ATIF1_RAT]	10.28	1	1	1	10	12.2403	9.59814	2.29051	10.28	1	1					23.6802	10.28	1	9	107
P52873	Pyruvate carboxylase, mitochondrial OS=Rattus norvegicus GN=Pc PE=1 SV=2 - [PYC_RAT]	3.14	1	2	2	10	129.695	6.81494	10.8066	3.14	2	3	14.7234	3.14	2	4	8.18007	3.14	2	3	1178
A0JPQ4	Tripartite motif-containing protein 72 OS=Rattus norvegicus GN=Trim72 PE=2 SV=1 - [TRI72_RAT]	8.81	1	3	3	10	52.7978	6.26514	10.0675	6.29	2	3	18.1076	8.81	3	5	4.09647	2.73	1	2	477
F1LPY7	Trans-2-enoyl-CoA reductase, mitochondrial OS=Rattus norvegicus GN=Mecr PE=2 SV=1 - [F1LPY7_RAT]	3.75	2	1	1	10	40.3092	8.77783	20.2629	3.75	1	6	10.627	3.75	1	4					373
F1M5N4	Malic enzyme OS=Rattus norvegicus GN=Me3 PE=2 SV=2 - [F1M5N4_RAT]	4.63	1	2	2	10	67.1657	7.97217	6.13564	4.63	2	2	2.94947	2.98	1	1	17.4973	4.63	2	7	605
G3V8L9	Polymerase I and transcript release factor OS=Rattus norvegicus GN=Ptrf PE=4 SV=1 - [G3V8L9_RAT]	15.56	2	4	4	10	43.882	5.51611	18.9877	8.16	2	5	6.60714	3.83	1	2	10.2094	11.73	3	3	392
Q7TP78	Aa2-258 OS=Rattus norvegicus GN=Ndufa8 PE=2 SV=1 - [Q7TP78_RAT]	11.11	1	2	2	10	21.952	8.104	0	6.88	1	1					22.0054	11.11	2	9	189
P70584	Short/branched chain specific acyl-CoA dehydrogenase, mitochondrial OS=Rattus norvegicus GN=Acadsb PE=1 SV=1 - [ACDSB_RAT]	5.09	1	1	1	9	47.7933	8.06006	14.2308	5.09	1	3	18.7228	5.09	1	4	8.94446	5.09	1	2	432
P29147	D-beta-hydroxybutyrate dehydrogenase, mitochondrial OS=Rattus norvegicus GN=Bdh1 PE=1 SV=2 - [BDH_RAT]	8.75	1	2	2	9	38.1773	8.83643	11.0737	8.75	2	3	16.4383	8.75	2	5	2.65459	2.92	1	1	343
B2RYW9	Fumarylacetoacetate hydrolase domain-containing protein 2 OS=Rattus norvegicus GN=Fahd2 PE=1 SV=1 - [FAHD2_RAT]	11.5	1	3	3	9	34.5591	8.35303	10.975	4.79	1	3	6.80568	4.79	1	2	9.91135	11.5	3	4	313
D3ZKG1	Protein Mut OS=Rattus norvegicus GN=Mut PE=4 SV=1 - [D3ZKG1_RAT]	13.64	2	6	6	9	82.8727	7.03467	11.7385	5.21	2	4	7.99824	5.21	2	2	6.9307	6.42	3	3	748
F1LRZ1	Ryanodine receptor 2 OS=Rattus norvegicus GN=Ryr2 PE=2 SV=2 - [F1LRZ1_RAT]	1.84	4	4	4	9	548.693	6.1001	13.4662	1.51	3	4	2.46427	0.54	1	1	13.1937	0.99	2	4	4826
M0RAK2	Protein Isoc2a OS=Rattus norvegicus GN=Isoc2a PE=4 SV=1 - [M0RAK2_RAT]	16.26	1	1	1	9	22.2339	8.6167	27.5412	16.26	1	5	10.646	16.26	1	2	10.7228	16.26	1	2	203
P23562-2	Isoform Kidney of Band 3 anion transport protein OS=Rattus norvegicus GN=Slc4a1 - [B3AT_RAT]	9.79	3	5	5	9	94.0928	6.63916	6.07206	3.89	2	2	5.56568	3.3	2	2	12.9007	5.9	3	5	848
Q5I0M1	Apolipoprotein H OS=Rattus norvegicus GN=Apoh PE=2 SV=1 - [Q5I0M1_RAT]	4.35	1	1	1	9	38.4317	8.20654	5.94371	4.35	1	2	9.37786	4.35	1	3	13.5055	4.35	1	4	345
P05505	Cytochrome c oxidase subunit 3 OS=Rattus norvegicus GN=Mtco3 PE=1 SV=5 - [COX3_RAT]	5.36	2	1	1	9	29.8512	7.13721									19.1112	5.36	1	9	261
B2RYS2	Cytochrome b-c1 complex subunit 7 OS=Rattus norvegicus GN=Uqcrb PE=3 SV=1 - [B2RYS2_RAT]	9.91	1	1	1	9	13.5499	9.30518									14.5254	9.91	1	9	111
P97532	3-mercaptopyruvate sulfurtransferase OS=Rattus norvegicus GN=Mpst PE=1 SV=3 - [THTM_RAT]	25.59	1	5	5	8	32.9194	6.31592	1.83552	4.38	1	1	7.3182	17.51	3	3	6.94931	12.46	3	4	297
P34058	Heat shock protein HSP 90-beta OS=Rattus norvegicus GN=Hsp90ab1 PE=1 SV=4 - [HS90B_RAT]	3.59	5	1	2	8	83.2291	5.03369	14.8576	3.59	2	5	2.70062	1.93	1	1	4.50622	1.93	1	2	724
Q6AYQ8	Acylpyruvase FAHD1, mitochondrial OS=Rattus norvegicus GN=Fahd1 PE=2 SV=1 - [FAHD1_RAT]	13.57	1	2	2	8	24.4646	7.73779	4.89578	13.57	2	2	10.9023	13.57	2	4	7.21184	6.33	1	2	221
Q5XIG4	OCIA domain-containing protein 1 OS=Rattus norvegicus GN=Ociad1 PE=1 SV=1 - [OCAD1_RAT]	12.15	1	2	2	8	27.6418	7.41553	7.823	7.29	1	2	10.6637	7.29	1	3	9.68101	12.15	2	3	247
D3ZIN5	Protein Vwa8 (Fragment) OS=Rattus norvegicus GN=Vwa8 PE=4 SV=2 - [D3ZIN5_RAT]	3.73	1	1	4	8	150.188	6.68311	5.40755	0.9	1	2	2.46583	1.04	1	1	12.1114	2.69	3	5	1340
D4A830	Protein Ppa2 OS=Rattus norvegicus GN=Ppa2 PE=4 SV=1 - [D4A830_RAT]	12.73	1	3	3	8	37.818	7.1665	11.0264	8.79	2	4	6.24298	4.85	1	2	6.07108	7.88	2	2	330
F1M964	Mitochondrial-processing peptidase subunit alpha OS=Rattus norvegicus GN=Pmpca PE=2 SV=1 - [F1M964_RAT]	3.26	3	1	1	8	58.2066	7.92822	7.42319	3.26	1	3	8.13758	3.26	1	2	12.2653	3.26	1	3	522
Q5XIE6-2	Isoform 2 of 3-hydroxyisobutyryl-CoA hydrolase, mitochondrial OS=Rattus norvegicus GN=Hibch - [HIBCH_RAT]	11.58	2	2	2	8	34.5031	9.1001	10.7605	7.72	1	3	13.0628	7.72	1	3	6.52083	11.58	2	2	311
P62076	Mitochondrial import inner membrane translocase subunit Tim13 OS=Rattus norvegicus GN=Timm13 PE=3 SV=1 - [TIM13_RAT]	14.74	1	1	1	7	10.4509	8.17725	3.41505	14.74	1	1	6.46373	14.74	1	2	11.1833	14.74	1	4	95
P10818	Cytochrome c oxidase subunit 6A1, mitochondrial OS=Rattus norvegicus GN=Cox6a1 PE=1 SV=2 - [CX6A1_RAT]	14.41	1	1	1	7	12.2933	9.31982	3.7983	14.41	1	1	3.09675	14.41	1	1	16.8547	14.41	1	5	111
Q80W89	NADH dehydrogenase [ubiquinone] 1 alpha subcomplex subunit 11 OS=Rattus norvegicus GN=Ndufa11 PE=2 SV=1 - [NDUAB_RAT]	27.66	1	2	2	7	14.8443	8.08936	2.92942	11.35	1	1	7.72717	27.66	2	2	14.8685	11.35	1	4	141
Q4FZT0	Stomatin-like protein 2, mitochondrial OS=Rattus norvegicus GN=Stoml2 PE=1 SV=1 - [STML2_RAT]	13.03	1	3	3	7	38.3902	8.63135	10.0438	3.97	1	3	4.11718	8.22	2	2	4.1198	4.82	1	2	353
Q58FK9	Kynurenine--oxoglutarate transaminase 3 OS=Rattus norvegicus GN=Ccbl2 PE=2 SV=1 - [KAT3_RAT]	11.89	2	3	3	7	51.0113	8.35303	3.19595	6.39	1	1	13.8826	11.89	3	4	5.3619	2.86	1	2	454
D3ZEH6	Protein Nudt8 OS=Rattus norvegicus GN=Nudt8 PE=4 SV=1 - [D3ZEH6_RAT]	15.24	1	2	2	7	23.0781	6.93213	6.65891	15.24	2	2	5.05928	15.24	2	2	8.64442	15.24	2	3	210
D3ZZQ8	Protein RGD1561381 OS=Rattus norvegicus GN=RGD1561381 PE=4 SV=1 - [D3ZZQ8_RAT]	8.55	2	1	1	7	16.7525	9.33447	3.16702	8.55	1	1	8.40614	8.55	1	3	8.16851	8.55	1	3	152
D4A678	Protein Spta1 OS=Rattus norvegicus GN=Spta1 PE=2 SV=2 - [D4A678_RAT]	2.77	2	4	4	7	279.917	5.04639	15.0656	1.28	2	4	4.12757	0.91	1	1	4.52808	0.58	1	2	2416
D4A786	Protein LOC100360002 OS=Rattus norvegicus GN=LOC100362685 PE=4 SV=1 - [D4A786_RAT]	17.24	3	1	1	7	6.37736	9.83252	2.74532	17.24	1	1	2.49168	17.24	1	1	9.89991	17.24	1	5	58
H9KVF8	NADH-ubiquinone oxidoreductase chain 1 (Fragment) OS=Rattus norvegicus GN=7066247 PE=3 SV=1 - [H9KVF8_RAT]	8.81	3	3	3	7	36.089	6.93213	3.61368	5.97	1	1	6.34398	6.29	2	2	11.9623	8.81	2	4	318
M0R9D5	Protein Ahnak OS=Rattus norvegicus GN=Ahnak PE=4 SV=1 - [M0R9D5_RAT]	3.69	1	2	2	7	571.304	6.22705	9.47238	3.69	2	3	13.8157	3.69	2	4					5363
O89035	Mitochondrial dicarboxylate carrier OS=Rattus norvegicus GN=Slc25a10 PE=2 SV=1 - [O89035_RAT]	8.39	1	1	1	7	31.4341	9.29053	9.39912	8.39	1	2	8.36337	8.39	1	2	9.82326	8.39	1	3	286
Q68FU7	Ubiquinone biosynthesis monooxygenase COQ6 OS=Rattus norvegicus GN=Coq6 PE=2 SV=1 - [COQ6_RAT]	5.67	1	2	2	7	51.4631	7.21045	7.48549	5.67	2	3	8.93018	2.94	1	3	2.94531	2.94	1	1	476
P11951	Cytochrome c oxidase subunit 6C-2 OS=Rattus norvegicus GN=Cox6c2 PE=1 SV=3 - [CX6C2_RAT]	15.79	1	1	1	6	8.44945	10.0669	2.98795	15.79	1	1	3.29949	15.79	1	1	12.0973	15.79	1	4	76
Q9WUS0	GTP:AMP phosphotransferase AK4, mitochondrial OS=Rattus norvegicus GN=Ak4 PE=2 SV=1 - [KAD4_RAT]	9.42	1	2	2	6	25.1873	8.01611	2.86406	4.48	1	1					9.91375	9.42	2	5	223
Q9QZ76	Myoglobin OS=Rattus norvegicus GN=Mb PE=1 SV=3 - [MYG_RAT]	11.69	1	2	2	6	17.146	8.104	11.2363	11.69	2	3	3.65133	11.04	1	1	7.52979	11.69	2	2	154
Q5U3Z3	Isochorismatase domain-containing protein 2, mitochondrial OS=Rattus norvegicus GN=Isoc2 PE=2 SV=1 - [ISOC2_RAT]	13.81	1	1	1	6	23.1423	7.82568	10.6591	13.81	1	3	7.03163	13.81	1	2	4.49816	13.81	1	1	210
Q68FT3	Pyridine nucleotide-disulfide oxidoreductase domain-containing protein 2 OS=Rattus norvegicus GN=Pyroxd2 PE=2 SV=1 - [PYRD2_RAT]	7.92	1	2	2	6	62.8394	8.17725	6.99556	7.92	2	2	4.31605	3.27	1	1	6.55562	4.65	1	3	581
Q4QQV3	Protein FAM162A OS=Rattus norvegicus GN=Fam162a PE=2 SV=1 - [F162A_RAT]	18.71	2	2	2	6	17.8155	9.99365	7.23722	7.74	1	2	3.35608	7.74	1	1	8.63106	18.71	2	3	155
P02770	Serum albumin OS=Rattus norvegicus GN=Alb PE=1 SV=2 - [ALBU_RAT]	6.25	1	3	3	6	68.6861	6.48096	6.38419	4.28	2	2	7.45811	6.25	3	3	2.279	1.97	1	1	608
F1LN92	Protein Afg3l2 OS=Rattus norvegicus GN=Afg3l2 PE=2 SV=1 - [F1LN92_RAT]	5.24	1	3	3	6	89.2955	8.60205	3.12204	1.75	1	1	1.97293	1.75	1	1	10.9238	5.24	3	4	802
H9KVF5	NADH-ubiquinone oxidoreductase chain 3 (Fragment) OS=Rattus norvegicus GN=7066254 PE=3 SV=1 - [H9KVF5_RAT]	13.04	3	1	1	6	13.0599	4.43701	7.99379	13.04	1	2	5.61726	13.04	1	2	7.95127	13.04	1	2	115
D3ZPP2	Protein Arl8a OS=Rattus norvegicus GN=Arl8a PE=3 SV=1 - [D3ZPP2_RAT]	12.37	2	1	1	6	21.376	7.76709					3.41316	12.37	1	1	11.9565	12.37	1	5	186
D4A7L4	NADH dehydrogenase (Ubiquinone) 1 beta subcomplex, 11 (Predicted) OS=Rattus norvegicus GN=Ndufb11 PE=4 SV=1 - [D4A7L4_RAT]	27.15	1	3	3	6	17.6229	5.23682					8.72913	27.15	2	3	9.25144	14.57	2	3	151
Q5RKI8	ATP-binding cassette sub-family B member 8, mitochondrial OS=Rattus norvegicus GN=Abcb8 PE=2 SV=1 - [ABCB8_RAT]	1.68	1	1	1	6	77.7211	9.5249									16.7436	1.68	1	6	714
Q4V8H8	EH domain-containing protein 2 OS=Rattus norvegicus GN=Ehd2 PE=1 SV=1 - [EHD2_RAT]	4.79	1	2	2	5	61.1988	6.55127	6.79626	2.76	1	2	5.13078	4.79	2	3					543
B0BN02	Mtx1 protein OS=Rattus norvegicus GN=Mtx1 PE=2 SV=1 - [B0BN02_RAT]	7.41	1	2	2	5	48.4128	9.46631	3.37569	3.7	1	1	10.9405	7.41	2	3	2.76927	3.7	1	1	432
D3ZN03	Protein LOC100362751 OS=Rattus norvegicus GN=LOC100362751 PE=3 SV=1 - [D3ZN03_RAT]	10.43	3	1	1	5	11.7549	4.58936	5.12353	10.43	1	2	6.09525	10.43	1	2	2.20987	10.43	1	1	115
F1MA54	3-phosphoinositide-dependent protein kinase 1 OS=Rattus norvegicus GN=Pdk1 PE=2 SV=2 - [F1MA54_RAT]	12.67	2	4	4	5	49.0678	8.00146	2.47098	3.69	1	1					7.06742	8.99	3	4	434
M0RCB1	Uncharacterized protein OS=Rattus norvegicus PE=3 SV=1 - [M0RCB1_RAT]	7.64	7	4	4	5	70.386	5.59229	1.66645	1.87	1	1	5.51726	4.37	2	2	3.90611	3.28	2	2	641
Q5RKJ9	RAB10, member RAS oncogene family OS=Rattus norvegicus GN=Rab10 PE=2 SV=1 - [Q5RKJ9_RAT]	6	1	1	1	5	22.5266	8.38232	5.3883	6	1	2	5.87691	6	1	2	2.93331	6	1	1	200
Q5U2X8	Acyl-CoA thioesterase 9 OS=Rattus norvegicus GN=Acot9 PE=2 SV=1 - [Q5U2X8_RAT]	8.88	1	3	3	5	50.4109	8.63135	3.32508	2.96	1	1	5.57745	5.92	2	2	5.97052	2.96	1	2	439
P16086	Spectrin alpha chain, non-erythrocytic 1 OS=Rattus norvegicus GN=Sptan1 PE=1 SV=2 - [SPTN1_RAT]	1.58	2	2	2	5	284.462	5.32568					17.7795	0.85	1	4	2.28108	0.73	1	1	2472
Q6AXV4	Sorting and assembly machinery component 50 homolog OS=Rattus norvegicus GN=Samm50 PE=1 SV=1 - [SAM50_RAT]	3.2	1	1	1	5	51.9274	6.80029					11.21	3.2	1	3	6.38079	3.2	1	2	469
D3ZJX5	Protein Timm50 OS=Rattus norvegicus GN=LOC687295 PE=4 SV=2 - [D3ZJX5_RAT]	7.65	1	2	2	5	39.8297	8.1333					4.60799	3.12	1	2	12.8966	4.53	1	3	353
Q5FVC4	DnaJ (Hsp40) homolog, subfamily B, member 12 OS=Rattus norvegicus GN=Dnajb12 PE=2 SV=1 - [Q5FVC4_RAT]	2.91	1	1	1	5	42.495	8.49951									13.0963	2.91	1	5	378
Q07936	Annexin A2 OS=Rattus norvegicus GN=Anxa2 PE=1 SV=2 - [ANXA2_RAT]	3.24	2	1	1	4	38.6538	7.69385	4.52139	3.24	1	2	5.39849	3.24	1	2					339
Q5XIF6	Tubulin alpha-4A chain OS=Rattus norvegicus GN=Tuba4a PE=2 SV=1 - [TBA4A_RAT]	3.57	5	1	1	4	49.8924	5.05908	9.49691	3.57	1	3	2.91735	3.57	1	1					448
P0CG51	Polyubiquitin-B OS=Rattus norvegicus GN=Ubb PE=1 SV=1 - [UBB_RAT]	20.98	6	1	1	4	34.3475	7.53271	12.7829	20.98	1	3	3.31161	20.98	1	1					305
Q3MIE0	Enoyl-CoA hydratase domain-containing protein 3, mitochondrial OS=Rattus norvegicus GN=Echdc3 PE=2 SV=1 - [ECHD3_RAT]	8.67	2	2	2	4	32.3649	8.57275	5.32519	4.33	1	2	5.36054	8.67	2	2					300
P57113	Maleylacetoacetate isomerase OS=Rattus norvegicus GN=Gstz1 PE=1 SV=2 - [MAAI_RAT]	17.13	1	2	2	4	23.9456	7.76709	3.84413	9.26	1	1	3.55636	9.26	1	1	6.58195	17.13	2	2	216
A1L1J4	Protein phosphatase 2C, magnesium dependent, catalytic subunit OS=Rattus norvegicus GN=Pdp1 PE=2 SV=1 - [A1L1J4_RAT]	7.99	2	2	2	4	61.1416	6.66846	5.49914	3.9	1	2	6.62025	7.99	2	2					538
B2RZ31	Protein Sirt3 OS=Rattus norvegicus GN=Sirt3 PE=2 SV=1 - [B2RZ31_RAT]	12.06	1	2	2	4	28.4788	5.8335	3.5335	6.61	1	1					7.553	12.06	2	3	257
B2RZD6	Ndufa4 protein OS=Rattus norvegicus GN=Ndufa4 PE=4 SV=1 - [B2RZD6_RAT]	14.63	1	1	1	4	9.32087	9.5249	4.75483	14.63	1	2	4.69438	14.63	1	2					82
D3Z9Z0	Ankyrin 1, erythroid OS=Rattus norvegicus GN=Ank1 PE=4 SV=1 - [D3Z9Z0_RAT]	1.58	1	2	2	4	187.008	6.69775	6.43936	1.58	2	2					5.7125	0.94	1	2	1707
D4A414	COX15 homolog, cytochrome c oxidase assembly protein (Yeast), isoform CRA_a OS=Rattus norvegicus GN=Cox15 PE=3 SV=1 - [D4A414_RAT]	7.73	1	2	2	4	45.8843	9.83252	7.34862	7.73	2	2	6.22621	3.38	1	2					414
F1M8L6	Protein Ndufa3 OS=Rattus norvegicus GN=Ndufa3 PE=2 SV=1 - [F1M8L6_RAT]	28.57	2	1	1	4	9.3798	8.49951	0	28.57	1	1					7.40718	28.57	1	3	84
G3V6G7	Polyribonucleotide nucleotidyltransferase 1 OS=Rattus norvegicus GN=Pnpt1 PE=4 SV=1 - [G3V6G7_RAT]	3.44	1	2	2	4	85.8435	8.1333	3.76954	1.79	1	1	3.29007	1.79	1	1	5.84166	3.44	2	2	784
P11232	Thioredoxin OS=Rattus norvegicus GN=Txn PE=1 SV=2 - [THIO_RAT]	12.38	1	1	1	4	11.6657	4.91943					6.54826	12.38	1	2	5.27016	12.38	1	2	105
P00762	Anionic trypsin-1 OS=Rattus norvegicus GN=Prss1 PE=1 SV=1 - [TRY1_RAT]	8.13	1	1	1	4	25.9427	4.89404					4.32343	8.13	1	1	10.6046	8.13	1	3	246
P11960	2-oxoisovalerate dehydrogenase subunit alpha, mitochondrial (Fragment) OS=Rattus norvegicus GN=Bckdha PE=1 SV=1 - [ODBA_RAT]	6.8	2	2	2	4	50.1329	7.82568					2.08201	4.54	1	2	4.35417	6.8	2	2	441
Q5I0K3	Citrate lyase subunit beta-like protein, mitochondrial OS=Rattus norvegicus GN=Clybl PE=2 SV=2 - [CLYBL_RAT]	11.24	2	3	3	4	37.2976	7.97217					7.40063	4.73	1	2	4.27822	6.51	2	2	338
D4AE56	Prostaglandin E synthase 2 (Predicted), isoform CRA_b OS=Rattus norvegicus GN=Ptges2 PE=4 SV=1 - [D4AE56_RAT]	14.84	1	3	3	4	43.4242	9.24658					10.5945	12.24	2	3	2.18848	2.6	1	1	384
M0R6F2	Protein Acad10 OS=Rattus norvegicus GN=Acad10 PE=4 SV=1 - [M0R6F2_RAT]	6.87	2	3	3	4	76.4387	8.5874					3.83927	2.78	1	1	6.77339	4.09	2	3	684
Q6XDA0	Erythroid spectrin beta OS=Rattus norvegicus GN=Sptb PE=2 SV=1 - [Q6XDA0_RAT]	2.06	1	3	3	4	246.176	5.31299					6.41874	0.56	1	2	5.89031	1.5	2	2	2137
D3ZIL6	Enoyl Coenzyme A hydratase domain containing 2 (Predicted), isoform CRA_a OS=Rattus norvegicus GN=Echdc2 PE=3 SV=1 - [D3ZIL6_RAT]	3.72	1	1	1	4	31.7588	9.33447									5.54709	3.72	1	4	296
F1LU71	AU RNA binding protein/enoyl-coenzyme A hydratase (Predicted), isoform CRA_a OS=Rattus norvegicus GN=Auh PE=3 SV=2 - [F1LU71_RAT]	2.86	1	1	1	4	33.32	9.42236									9.34128	2.86	1	4	315
F1M3N2	Protein Nsl1 OS=Rattus norvegicus GN=LOC679582 PE=4 SV=2 - [F1M3N2_RAT]	4.98	1	1	1	4	31.475	5.77002									8.77781	4.98	1	4	281
Q920A6	Retinoid-inducible serine carboxypeptidase OS=Rattus norvegicus GN=Scpep1 PE=2 SV=1 - [RISC_RAT]	3.98	1	1	1	3	51.1418	5.52881	5.86413	3.98	1	2	3.59513	3.98	1	1					452
P53987	Monocarboxylate transporter 1 OS=Rattus norvegicus GN=Slc16a1 PE=1 SV=1 - [MOT1_RAT]	2.63	1	1	1	3	53.2034	8.32373	2.18574	2.63	1	1					6.38888	2.63	1	2	494
Q3B8P0	Presenilins-associated rhomboid-like protein, mitochondrial OS=Rattus norvegicus GN=Parl PE=2 SV=1 - [PARL_RAT]	5.31	2	1	1	3	42.0989	9.90576	1.86602	5.31	1	1	4.36434	5.31	1	2					377
D3ZAQ0	Protein Fundc2 OS=Rattus norvegicus GN=Fundc2 PE=4 SV=1 - [D3ZAQ0_RAT]	14.57	1	2	2	3	16.3337	10.0522	1.86853	6.62	1	1					4.17196	14.57	2	2	151
D3ZFR9	Protein Rdh13 OS=Rattus norvegicus GN=Rdh13 PE=3 SV=1 - [D3ZFR9_RAT]	5.99	1	1	1	3	36.385	8.86572	7.74215	5.99	1	2	4.28567	5.99	1	1					334
D3ZGY4	Glyceraldehyde-3-phosphate dehydrogenase OS=Rattus norvegicus GN=RGD1560797 PE=3 SV=1 - [D3ZGY4_RAT]	11.71	10	2	2	3	35.8001	7.76709	4.44766	7.21	1	1	4.11786	7.21	1	1	2.69302	4.5	1	1	333
D3ZL85	Protein Hccs OS=Rattus norvegicus GN=Hccs PE=4 SV=1 - [D3ZL85_RAT]	9.49	1	2	2	3	31.1099	6.72705	4.09784	5.47	1	1					2.0364	9.49	2	2	274
D3ZUX7	Protein Acsf3 OS=Rattus norvegicus GN=Acsf3 PE=4 SV=1 - [D3ZUX7_RAT]	5.49	1	2	2	3	65.2248	8.68994	5.38716	5.49	2	2	4.11575	3.43	1	1					583
D3ZWW5	Protein Slc30a9 OS=Rattus norvegicus GN=Slc30a9 PE=4 SV=1 - [D3ZWW5_RAT]	2.82	1	1	1	3	62.6445	8.48486	2.58618	2.82	1	1	2.547	2.82	1	1	2.70378	2.82	1	1	567
D3ZXF9	Protein Mrpl12 OS=Rattus norvegicus GN=Mrpl12 PE=4 SV=1 - [D3ZXF9_RAT]	5.07	1	1	1	3	29.4229	9.65674	3.10682	5.07	1	1					6.2265	5.07	1	2	276
D4A0Y4	Oxidoreductase NAD-binding domain containing 1 (Predicted), isoform CRA_b OS=Rattus norvegicus GN=Oxnad1 PE=4 SV=1 - [D4A0Y4_RAT]	3.59	1	1	1	3	37.4034	8.96826	2.33989	3.59	1	1	3.00419	3.59	1	1	2.51521	3.59	1	1	334
D4A8Z2	Uncharacterized protein OS=Rattus norvegicus PE=2 SV=2 - [D4A8Z2_RAT]	3.18	5	1	1	3	52.9317	9.02686	4.58697	3.18	1	1	6.45943	3.18	1	2					472
G3V6I5	Protein Dnaja3 OS=Rattus norvegicus GN=Dnaja3 PE=3 SV=1 - [G3V6I5_RAT]	5.83	1	2	2	3	52.3704	9.27588	2.2774	3.33	1	1	0	3.33	1	1	2.0773	2.5	1	1	480
M0RDK9	Protein Acad8 (Fragment) OS=Rattus norvegicus GN=Acad8 PE=3 SV=1 - [M0RDK9_RAT]	10.29	1	3	3	3	33.2806	8.39697	1.84113	3.22	1	1					4.0919	7.07	2	2	311
P26453-2	Isoform 2 of Basigin OS=Rattus norvegicus GN=Bsg - [BASI_RAT]	8.46	2	2	2	3	29.567	5.2749	3.224	4.78	1	1	2.70174	4.78	1	1	1.67596	3.68	1	1	272
Q3V5X8	Endonuclease G OS=Rattus norvegicus GN=Endog PE=2 SV=1 - [Q3V5X8_RAT]	9.18	1	2	2	3	32.2478	9.51025	3.11421	5.78	1	1					4.92075	3.4	1	2	294
Q920F5-2	Isoform Cytoplasmic+peroxisomal of Malonyl-CoA decarboxylase, mitochondrial OS=Rattus norvegicus GN=Mlycd - [DCMC_RAT]	8.15	2	3	3	3	50.653	7.69385	2.60727	3.3	1	1					5.36472	4.85	2	2	454
P24329	Thiosulfate sulfurtransferase OS=Rattus norvegicus GN=Tst PE=1 SV=3 - [THTR_RAT]	6.4	1	1	1	3	33.3858	7.85498					3.49939	6.4	1	1	6.5274	6.4	1	2	297
Q6MGB5	Estradiol 17-beta-dehydrogenase 8 OS=Rattus norvegicus GN=Hsd17b8 PE=3 SV=1 - [DHB8_RAT]	10.42	1	2	2	3	26.7738	6.55127					1.85705	5.79	1	1	2.88465	10.42	2	2	259
P22062	Protein-L-isoaspartate(D-aspartate) O-methyltransferase OS=Rattus norvegicus GN=Pcmt1 PE=1 SV=2 - [PIMT_RAT]	19.38	1	3	3	3	24.6257	7.6792					6.92621	13.22	2	2	3.08248	6.17	1	1	227
F1LNV4	ATP-binding cassette sub-family B member 7, mitochondrial OS=Rattus norvegicus GN=Abcb7 PE=2 SV=2 - [F1LNV4_RAT]	1.73	2	1	1	3	82.703	9.29053					3.05485	1.73	1	1	4.45892	1.73	1	2	752
Q3B8P7	Protein 1700021F05Rik OS=Rattus norvegicus GN=LOC683897 PE=2 SV=1 - [Q3B8P7_RAT]	6.25	1	1	1	3	27.5045	9.23193					9.77133	6.25	1	3					240
Q6IRL2	Mitofusin 2 OS=Rattus norvegicus GN=LOC100911485 PE=2 SV=1 - [Q6IRL2_RAT]	2.25	2	1	1	3	86.1258	6.85889					12.7538	2.25	1	3					757
D3Z9R8	6.8 kDa mitochondrial proteolipid OS=Rattus norvegicus GN=Mp68 PE=1 SV=1 - [68MP_RAT]	23.33	1	2	2	3	6.90965	9.92041									4.84193	23.33	2	3	60
Q8VID1	Dehydrogenase/reductase SDR family member 4 OS=Rattus norvegicus GN=Dhrs4 PE=2 SV=2 - [DHRS4_RAT]	6.81	2	2	2	3	29.8028	9.5542									5.48131	6.81	2	3	279
D3ZKE6	Sarcolemma associated protein (Predicted) OS=Rattus norvegicus GN=Slmap PE=4 SV=1 - [D3ZKE6_RAT]	1.27	2	1	1	3	90.504	5.19873									5.89604	1.27	1	3	787
D3ZX69	39S ribosomal protein L10, mitochondrial OS=Rattus norvegicus GN=Mrpl10 PE=4 SV=1 - [D3ZX69_RAT]	12.21	2	2	2	3	29.4469	9.74463									6.76145	12.21	2	3	262
D3ZXK4	Protein Abhd11 OS=Rattus norvegicus GN=Abhd11 PE=4 SV=1 - [D3ZXK4_RAT]	11.4	1	3	3	3	33.1953	9.30518									8.00846	11.4	3	3	307
D4AA54	Protein Plekhh1 (Fragment) OS=Rattus norvegicus GN=Plekhh1 PE=2 SV=2 - [D4AA54_RAT]	0.81	1	1	1	3	151.006	7.73779									6.10601	0.81	1	3	1360
G3V879	Ubiquinone biosynthesis protein COQ7 homolog OS=Rattus norvegicus GN=Coq7 PE=4 SV=2 - [G3V879_RAT]	20.11	2	2	2	3	20.1132	5.75732									8.17927	20.11	2	3	179
P24268	Cathepsin D OS=Rattus norvegicus GN=Ctsd PE=1 SV=1 - [CATD_RAT]	4.42	2	1	1	2	44.6519	7.09326	2.52213	4.42	1	1	3.19356	4.42	1	1					407
P29117	Peptidyl-prolyl cis-trans isomerase F, mitochondrial OS=Rattus norvegicus GN=Ppif PE=1 SV=2 - [PPIF_RAT]	10.19	1	1	1	2	21.7961	9.14404	4.45166	10.19	1	1					3.71494	10.19	1	1	206
Q05175	Brain acid soluble protein 1 OS=Rattus norvegicus GN=Basp1 PE=1 SV=2 - [BASP1_RAT]	6.36	1	1	1	2	21.7774	4.51318	1.86485	6.36	1	1	2.4934	6.36	1	1					220
P27881	Hexokinase-2 OS=Rattus norvegicus GN=Hk2 PE=1 SV=1 - [HXK2_RAT]	2.73	2	2	2	2	102.478	6.1001	2.36339	1.2	1	1	2.25482	1.53	1	1					917
Q66H12	Alpha-N-acetylgalactosaminidase OS=Rattus norvegicus GN=Naga PE=2 SV=1 - [NAGAB_RAT]	4.1	1	1	1	2	46.8405	5.85889	3.57585	4.1	1	1	3.97242	4.1	1	1					415
Q5M9G9	Protein TBRG4 OS=Rattus norvegicus GN=Tbrg4 PE=2 SV=1 - [TBRG4_RAT]	3.02	1	1	1	2	71.1357	8.36768	2.77914	3.02	1	1	4.21251	3.02	1	1					629
Q9WVJ4	Synaptojanin-2-binding protein OS=Rattus norvegicus GN=Synj2bp PE=1 SV=2 - [SYJ2B_RAT]	9.66	1	1	1	2	15.8153	6.80029	3.16794	9.66	1	1	1.82062	9.66	1	1					145
B0BN86	Transmembrane protein 11, mitochondrial OS=Rattus norvegicus GN=Tmem11 PE=2 SV=1 - [TMM11_RAT]	8.42	1	1	1	2	21.3279	7.35693	3.11945	8.42	1	1					3.94666	8.42	1	1	190
D3Z9L0	Protein Agk OS=Rattus norvegicus GN=Agk PE=4 SV=1 - [D3Z9L0_RAT]	3.09	1	1	1	2	46.7391	8.25049	0	3.09	1	1					2.0045	3.09	1	1	421
D3ZR27	Mitofusin-1 OS=Rattus norvegicus GN=Mfn1 PE=4 SV=2 - [D3ZR27_RAT]	4.18	2	2	2	2	83.5987	6.43018	1.89836	1.75	1	1					3.15149	2.43	1	1	741
D3ZXA6	Protein Pdpr OS=Rattus norvegicus GN=Pdpr PE=3 SV=1 - [D3ZXA6_RAT]	2.96	1	2	2	2	98.7556	6.48096	2.9929	1.59	1	1					0	1.37	1	1	878
D4A6X1	Dysferlin (Predicted), isoform CRA_a OS=Rattus norvegicus GN=Dysf PE=4 SV=2 - [D4A6X1_RAT]	0.84	1	1	1	2	230.825	5.68115	3.02967	0.84	1	1	3.13178	0.84	1	1					2029
D4ADD7	Glutaredoxin 5 homolog (S. cerevisiae) (Predicted), isoform CRA_b OS=Rattus norvegicus GN=Glrx5 PE=4 SV=1 - [D4ADD7_RAT]	12.5	1	1	1	2	16.4215	7.28369	3.70471	12.5	1	1	3.72899	12.5	1	1					152
F1LQZ0	Protein Tmem65 OS=Rattus norvegicus GN=Tmem65 PE=2 SV=1 - [F1LQZ0_RAT]	10.42	1	2	2	2	27.7156	8.104	2.57915	5.02	1	1					1.77105	5.41	1	1	259
F1LVY9	Protein Pdf OS=Rattus norvegicus GN=Pdf PE=3 SV=2 - [F1LVY9_RAT]	4.33	1	1	1	2	25.8626	9.26123	3.28638	4.33	1	1					2.5235	4.33	1	1	231
F1M944	Calsequestrin OS=Rattus norvegicus GN=Casq2 PE=2 SV=1 - [F1M944_RAT]	3.39	2	1	1	2	47.8683	4.31006	4.53649	3.39	1	1	4.3613	3.39	1	1					413
F8WFI0	Delta-1-pyrroline-5-carboxylate dehydrogenase, mitochondrial OS=Rattus norvegicus GN=Tas1r2 PE=3 SV=2 - [F8WFI0_RAT]	2.67	4	1	1	2	61.7586	8.04541	2.0662	2.67	1	1					3.0089	2.67	1	1	562
G3V6R7	3-oxoacyl-[acyl-carrier-protein] synthase, mitochondrial OS=Rattus norvegicus GN=Oxsm PE=3 SV=1 - [G3V6R7_RAT]	3.07	1	1	1	2	47.9742	7.34229	3.11061	3.07	1	1	3.01455	3.07	1	1					456
M0R6J0	Protein Mrpl39 OS=Rattus norvegicus GN=LOC684304 PE=4 SV=1 - [M0R6J0_RAT]	5.97	1	1	1	2	36.5448	8.35303	3.00673	5.97	1	1					2.05129	5.97	1	1	318
M0R785	Protein Chchd2 OS=Rattus norvegicus GN=Chchd2 PE=4 SV=1 - [M0R785_RAT]	16.23	2	1	1	2	15.8389	9.33447	2.70674	16.23	1	1					3.00052	16.23	1	1	154
M0RAS8	Elongation factor 1-alpha (Fragment) OS=Rattus norvegicus PE=3 SV=1 - [M0RAS8_RAT]	2.74	6	1	1	2	43.7443	6.65381	1.89179	2.74	1	1					1.79069	2.74	1	1	402
Q6PCT3	Tumor protein D54 OS=Rattus norvegicus GN=Tpd52l2 PE=2 SV=1 - [TPD54_RAT]	7.27	1	1	1	2	23.9771	6.15088					8.54121	7.27	1	2					220
P97519	Hydroxymethylglutaryl-CoA lyase, mitochondrial OS=Rattus norvegicus GN=Hmgcl PE=2 SV=1 - [HMGCL_RAT]	3.38	1	1	1	2	34.1697	8.41162					2.58686	3.38	1	1	2.44777	3.38	1	1	325
Q75Q41	Mitochondrial import receptor subunit TOM22 homolog OS=Rattus norvegicus GN=Tomm22 PE=1 SV=1 - [TOM22_RAT]	16.9	1	1	1	2	15.4808	4.33545					5.73932	16.9	1	2					142
P05503	Cytochrome c oxidase subunit 1 OS=Rattus norvegicus GN=Mtco1 PE=2 SV=2 - [COX1_RAT]	6.03	3	2	2	2	56.899	6.80029					2.60397	2.72	1	1	2.11291	3.31	1	1	514
P04182	Ornithine aminotransferase, mitochondrial OS=Rattus norvegicus GN=Oat PE=1 SV=1 - [OAT_RAT]	6.61	1	2	2	2	48.302	6.99072					2.74573	4.56	1	1	1.89026	2.05	1	1	439
Q4QQW3	Hydroxyacid-oxoacid transhydrogenase, mitochondrial OS=Rattus norvegicus GN=Adhfe1 PE=1 SV=1 - [HOT_RAT]	2.78	1	1	1	2	50.1935	7.54736					2.168	2.78	1	1	1.69005	2.78	1	1	467
B1WBY5	DnaJ (Hsp40) homolog, subfamily C, member 11 OS=Rattus norvegicus GN=Dnajc11 PE=2 SV=1 - [B1WBY5_RAT]	6.8	1	2	2	2	63.1658	8.32373					5.87461	3.58	1	1	3.01284	3.22	1	1	559
B2GUZ6	Protein Rtn4ip1 OS=Rattus norvegicus GN=Rtn4ip1 PE=2 SV=1 - [B2GUZ6_RAT]	3.28	1	1	1	2	43.5776	9.20264					2.41507	3.28	1	2					396
F7EZZ0	Disks large-associated protein 3 OS=Rattus norvegicus GN=Dap3 PE=4 SV=1 - [F7EZZ0_RAT]	3.54	1	1	1	2	45.0834	9.1001					6.75294	3.54	1	2					396
G3V6P7	Myosin, heavy polypeptide 9, non-muscle OS=Rattus norvegicus GN=LOC100911597 PE=4 SV=1 - [G3V6P7_RAT]	1.58	8	2	2	2	226.273	5.65576					7.5583	1.58	2	2					1960
Q5FVL8	ATP-binding cassette, sub-family B (MDR/TAP), member 10 OS=Rattus norvegicus GN=Abcb10 PE=2 SV=1 - [Q5FVL8_RAT]	5.73	1	2	2	2	77.346	9.62744					5.9043	5.73	2	2					715
Q5U3Z7	Serine hydroxymethyltransferase OS=Rattus norvegicus GN=Shmt2 PE=2 SV=1 - [Q5U3Z7_RAT]	3.57	1	1	1	2	55.7296	8.20654					4.95212	3.57	1	1	1.97379	3.57	1	1	504
Q64542-3	Isoform ZA of Plasma membrane calcium-transporting ATPase 4 OS=Rattus norvegicus GN=Atp2b4 - [AT2B4_RAT]	1.21	16	1	1	2	127.384	6.53662					1.6143	1.21	1	2					1157
P04166	Cytochrome b5 type B OS=Rattus norvegicus GN=Cyb5b PE=1 SV=2 - [CYB5B_RAT]	21.92	1	2	2	2	16.2548	5.05908									5.30635	21.92	2	2	146
P07483	Fatty acid-binding protein, heart OS=Rattus norvegicus GN=Fabp3 PE=1 SV=2 - [FABPH_RAT]	10.53	1	1	1	2	14.7656	6.32861									5.96508	10.53	1	2	133
P07340	Sodium/potassium-transporting ATPase subunit beta-1 OS=Rattus norvegicus GN=Atp1b1 PE=1 SV=1 - [AT1B1_RAT]	4.61	1	1	1	2	35.179	8.646									3.34671	4.61	1	2	304
P97576	GrpE protein homolog 1, mitochondrial OS=Rattus norvegicus GN=Grpel1 PE=1 SV=2 - [GRPE1_RAT]	10.14	1	2	2	2	24.2819	8.38232									5.16163	10.14	2	2	217
Q5HZA9	Transmembrane protein 126A OS=Rattus norvegicus GN=Tmem126a PE=2 SV=1 - [T126A_RAT]	8.67	1	2	2	2	21.6436	9.53955									4.82192	8.67	2	2	196
Q5U2U0	ATP-dependent Clp protease ATP-binding subunit clpX-like, mitochondrial OS=Rattus norvegicus GN=Clpx PE=2 SV=1 - [CLPX_RAT]	1.74	1	1	1	2	69.1647	7.72314									2.25602	1.74	1	2	633
Q64057	Alpha-aminoadipic semialdehyde dehydrogenase OS=Rattus norvegicus GN=Aldh7a1 PE=1 SV=2 - [AL7A1_RAT]	7.98	1	2	2	2	58.7114	7.86963									6.50957	7.98	2	2	539
P02454	Collagen alpha-1(I) chain OS=Rattus norvegicus GN=Col1a1 PE=1 SV=5 - [CO1A1_RAT]	1.24	1	1	1	2	137.869	5.92236									1.67696	1.24	1	2	1453
B0BN30	Mtch1 protein OS=Rattus norvegicus GN=Mtch1 PE=2 SV=1 - [B0BN30_RAT]	3.08	1	1	1	2	41.5653	9.31982									4.08706	3.08	1	2	389
D3ZT98	Protein Bola3 OS=Rattus norvegicus GN=Bola3 PE=3 SV=1 - [D3ZT98_RAT]	11.82	1	1	1	2	12.2893	9.24658									6.79095	11.82	1	2	110
G3V9S0	Cytochrome b5 reductase 1 OS=Rattus norvegicus GN=Cyb5r1 PE=4 SV=1 - [G3V9S0_RAT]	5.25	2	1	1	2	34.2111	8.83643									5.04233	5.25	1	2	305
Q5XIM0	BCS1-like (Yeast) OS=Rattus norvegicus GN=Bcs1l PE=2 SV=1 - [Q5XIM0_RAT]	5.74	1	2	2	2	47.3633	8.23584									4.61617	5.74	2	2	418
P07632	Superoxide dismutase [Cu-Zn] OS=Rattus norvegicus GN=Sod1 PE=1 SV=2 - [SODC_RAT]	7.14	1	1	1	1	15.9018	6.354	2.49696	7.14	1	1									154
P62074	Mitochondrial import inner membrane translocase subunit Tim10 OS=Rattus norvegicus GN=Timm10 PE=3 SV=1 - [TIM10_RAT]	14.44	1	1	1	1	10.3259	6.29053	3.59698	14.44	1	1									90
Q4G064	2-methoxy-6-polyprenyl-1,4-benzoquinol methylase, mitochondrial OS=Rattus norvegicus GN=Coq5 PE=2 SV=1 - [COQ5_RAT]	6.73	1	1	1	1	37.2771	8.80713	2.97274	6.73	1	1									327
P49134	Integrin beta-1 OS=Rattus norvegicus GN=Itgb1 PE=2 SV=1 - [ITB1_RAT]	2.13	1	1	1	1	88.4364	6.07471	3.18322	2.13	1	1									799
Q4G012	UPF0562 protein C7orf55 homolog OS=Rattus norvegicus PE=3 SV=1 - [CG055_RAT]	17.7	1	1	1	1	12.7367	10.0815	2.34938	17.7	1	1									113
Q68FX9	NAD-dependent protein deacylase sirtuin-5, mitochondrial OS=Rattus norvegicus GN=Sirt5 PE=2 SV=1 - [SIR5_RAT]	7.1	1	1	1	1	34.0763	8.74854	2.48083	7.1	1	1									310
Q03346	Mitochondrial-processing peptidase subunit beta OS=Rattus norvegicus GN=Pmpcb PE=1 SV=3 - [MPPB_RAT]	2.04	1	1	1	1	54.2304	6.69775	2.60466	2.04	1	1									489
A9UMV2	Mitochondrial ribosomal protein S24 OS=Rattus norvegicus GN=Mrps24 PE=2 SV=1 - [A9UMV2_RAT]	10.18	1	1	1	1	18.7298	9.43701	3.15153	10.18	1	1									167
D3ZCI0	Glycerol kinase OS=Rattus norvegicus GN=Gk PE=3 SV=2 - [D3ZCI0_RAT]	2.48	2	1	1	1	57.4261	5.65576	1.90036	2.48	1	1									524
D3ZEG8	Protein RGD1309188 OS=Rattus norvegicus GN=RGD1309188 PE=4 SV=1 - [D3ZEG8_RAT]	5.24	1	1	1	1	29.8543	8.03076	2.99516	5.24	1	1									267
D3ZTN2	Protein Cmc1 OS=Rattus norvegicus GN=Cmc1 PE=4 SV=2 - [D3ZTN2_RAT]	9.43	1	1	1	1	12.5633	8.23584	2.50721	9.43	1	1									106
D4A1T7	Protein Fam173a OS=Rattus norvegicus GN=Fam173a PE=4 SV=1 - [D4A1T7_RAT]	8.11	1	1	1	1	23.9007	8.74854	0	8.11	1	1									222
D4A9P9	Gup1, glycerol uptake/transporter homolog (Yeast) (Predicted) OS=Rattus norvegicus GN=Hhatl PE=4 SV=1 - [D4A9P9_RAT]	3.58	1	1	1	1	56.3411	6.59521	2.41089	3.58	1	1									503
F1LMZ4	Ribosome-releasing factor 2, mitochondrial OS=Rattus norvegicus GN=Gfm2 PE=2 SV=2 - [F1LMZ4_RAT]	2.44	2	1	1	1	85.8606	6.50732	2.97924	2.44	1	1									779
F1LPX0	Mitochondrial intermediate peptidase OS=Rattus norvegicus GN=Mipep PE=2 SV=1 - [F1LPX0_RAT]	2.39	2	1	1	1	80.6023	6.46826	4.37013	2.39	1	1									710
F1M9A4	Uncharacterized protein OS=Rattus norvegicus GN=Mrpl1 PE=2 SV=2 - [F1M9A4_RAT]	3.74	2	1	1	1	35.866	9.11475	2.53334	3.74	1	1									321
G3V698	4-hydroxybenzoate polyprenyltransferase, mitochondrial OS=Rattus norvegicus GN=Coq2 PE=4 SV=1 - [G3V698_RAT]	2.94	2	1	1	1	40.5371	8.88037	2.40205	2.94	1	1									374
G3V852	Protein Tln1 OS=Rattus norvegicus GN=Tln1 PE=4 SV=1 - [G3V852_RAT]	0.51	1	1	1	1	269.504	6.20166	3.15691	0.51	1	1									2541
M0RDY2	Protein Fam185a OS=Rattus norvegicus GN=Fam185a PE=4 SV=1 - [M0RDY2_RAT]	8	1	1	1	1	18.3383	6.75635	2.45491	8	1	1									175
Q5XIG9	Mitochondrial protein 18 kDa OS=Rattus norvegicus GN=Mtfp1 PE=2 SV=1 - [Q5XIG9_RAT]	12.05	1	1	1	1	18.3547	9.45166	2.75931	12.05	1	1									166
R9PXR4	Mitochondrial import receptor subunit TOM70 OS=Rattus norvegicus GN=Tomm70a PE=4 SV=1 - [R9PXR4_RAT]	4.11	2	1	1	1	61.8991	7.48877	2.91061	4.11	1	1									560
P02650	Apolipoprotein E OS=Rattus norvegicus GN=Apoe PE=1 SV=2 - [APOE_RAT]	4.49	1	1	1	1	35.7313	5.2749					3.13772	4.49	1	1					312
P53534	Glycogen phosphorylase, brain form (Fragment) OS=Rattus norvegicus GN=Pygb PE=1 SV=3 - [PYGB_RAT]	1.55	2	1	1	1	96.1131	6.68311					2.64716	1.55	1	1					838
Q64119	Myosin light polypeptide 6 OS=Rattus norvegicus GN=Myl6 PE=1 SV=3 - [MYL6_RAT]	10.6	1	1	1	1	16.9641	4.55127					3.03145	10.6	1	1					151
Q505J9	ATPase family AAA domain-containing protein 1 OS=Rattus norvegicus GN=Atad1 PE=1 SV=1 - [ATAD1_RAT]	5.54	1	1	1	1	40.691	6.90283					2.22356	5.54	1	1					361
Q5I0L3	Tyrosine--tRNA ligase, mitochondrial OS=Rattus norvegicus GN=Yars2 PE=2 SV=1 - [SYYM_RAT]	4.46	1	1	1	1	52.5944	9.23193					2.86976	4.46	1	1					471
Q5FVQ8	NLR family member X1 OS=Rattus norvegicus GN=Nlrx1 PE=2 SV=1 - [NLRX1_RAT]	2.16	1	1	1	1	107.522	7.56201					3.56742	2.16	1	1					973
Q3KRE0	ATPase family AAA domain-containing protein 3 OS=Rattus norvegicus GN=Atad3 PE=1 SV=1 - [ATAD3_RAT]	3.55	1	1	1	1	66.7175	9.29053					3.03986	3.55	1	1					591
G3V7P1	Syntaxin-12 OS=Rattus norvegicus GN=Stx12 PE=1 SV=1 - [STX12_RAT]	6.93	1	1	1	1	31.1679	5.32568					5.76945	6.93	1	1					274
P35738	2-oxoisovalerate dehydrogenase subunit beta, mitochondrial OS=Rattus norvegicus GN=Bckdhb PE=1 SV=3 - [ODBB_RAT]	3.08	1	1	1	1	42.7958	6.82959					3.28508	3.08	1	1					390
B0K036	Succinate dehydrogenase assembly factor 1, mitochondrial OS=Rattus norvegicus GN=Sdhaf1 PE=3 SV=1 - [SDHF1_RAT]	12.71	1	1	1	1	13.304	11.2388					2.17585	12.71	1	1					118
Q5BJS4	FUN14 domain-containing protein 1 OS=Rattus norvegicus GN=Fundc1 PE=2 SV=1 - [FUND1_RAT]	10.97	1	1	1	1	17.1478	8.63135					2.95634	10.97	1	1					155
Q9NQR8	NADH dehydrogenase [ubiquinone] 1 alpha subcomplex assembly factor 4 OS=Rattus norvegicus GN=Ndufaf4 PE=1 SV=1 - [NDUF4_RAT]	10.92	1	1	1	1	20.1457	8.99756					3.37604	10.92	1	1					174
Q5XIC2	Evolutionarily conserved signaling intermediate in Toll pathway, mitochondrial OS=Rattus norvegicus GN=Ecsit PE=1 SV=1 - [ECSIT_RAT]	3.23	1	1	1	1	49.5881	6.43018					2.29333	3.23	1	1					434
O35796	Complement component 1 Q subcomponent-binding protein, mitochondrial OS=Rattus norvegicus GN=C1qbp PE=1 SV=2 - [C1QBP_RAT]	7.17	1	1	1	1	30.9775	4.86865					4.29934	7.17	1	1					279
Q6IRK9	Carboxypeptidase Q OS=Rattus norvegicus GN=Cpq PE=1 SV=1 - [CBPQ_RAT]	2.33	1	1	1	1	52.0086	6.41748					0	2.33	1	1					472
B0BN56	28S ribosomal protein S31, mitochondrial OS=Rattus norvegicus GN=Mrps31 PE=2 SV=1 - [RT31_RAT]	5.94	1	1	1	1	43.9345	8.27979					5.61327	5.94	1	1					387
A1L1L6	Mitochondrial Rho GTPase OS=Rattus norvegicus GN=Rhot1 PE=2 SV=1 - [A1L1L6_RAT]	2.54	1	1	1	1	72.1106	6.40479					1.98709	2.54	1	1					631
D3ZGM1	Protein Ptcd3 OS=Rattus norvegicus GN=Ptcd3 PE=2 SV=1 - [D3ZGM1_RAT]	2.33	1	1	1	1	77.8418	6.20166					2.97264	2.33	1	1					687
D3ZQN7	Protein Lamb1 OS=Rattus norvegicus GN=Lamb1 PE=2 SV=2 - [D3ZQN7_RAT]	1.2	1	1	1	1	202.655	5.04639					2.77163	1.2	1	1					1834
D3ZYL4	Mitochondrial ribosomal protein L50 (Predicted) OS=Rattus norvegicus GN=Mrpl50 PE=4 SV=1 - [D3ZYL4_RAT]	7.55	1	1	1	1	18.3075	8.99756					2.26407	7.55	1	1					159
F1LMI8	Troponin T, cardiac muscle OS=Rattus norvegicus GN=Tnnt2 PE=2 SV=2 - [F1LMI8_RAT]	5.54	4	1	1	1	34.3444	5.32568					2.81333	5.54	1	1					289
F1LP46	ATP-dependent RNA helicase SUPV3L1, mitochondrial (Fragment) OS=Rattus norvegicus GN=Supv3l1 PE=2 SV=1 - [F1LP46_RAT]	2.19	2	1	1	1	77.7783	7.10791					0	2.19	1	1					686
F1LWG4	NADH dehydrogenase (Ubiquinone) 1 alpha subcomplex, assembly factor 1 (Predicted), isoform CRA_a OS=Rattus norvegicus GN=Ndufaf1 PE=4 SV=2 - [F1LWG4_RAT]	3.35	1	1	1	1	37.7581	8.104					1.81877	3.35	1	1					328
F7FDM3	Protein Mtif2 (Fragment) OS=Rattus norvegicus GN=Mtif2 PE=4 SV=1 - [F7FDM3_RAT]	3.22	1	1	1	1	58.4135	5.98584					2.46316	3.22	1	1					528
G3V6S0	Protein Sptbn1 OS=Rattus norvegicus GN=Sptbn1 PE=4 SV=2 - [G3V6S0_RAT]	0.81	1	1	1	1	273.317	5.71924					4.39109	0.81	1	1					2357
G3V8F5	Mitochondrial import receptor subunit TOM40 homolog OS=Rattus norvegicus GN=Tomm40 PE=4 SV=1 - [G3V8F5_RAT]	9.42	2	1	1	1	37.8961	7.97217					3.16176	9.42	1	1					361
M0R9Q9	Cytosol aminopeptidase (Fragment) OS=Rattus norvegicus GN=Lap3 PE=3 SV=1 - [M0R9Q9_RAT]	3.9	3	1	1	1	52.5947	6.48096					2.79619	3.9	1	1					487
M0RD20	Calpain small subunit 1 OS=Rattus norvegicus GN=Capns1 PE=4 SV=1 - [M0RD20_RAT]	9.88	2	1	1	1	25.4304	5.42725					2.57989	9.88	1	1					243
M0RDM4	Histone H2A OS=Rattus norvegicus GN=LOC680322 PE=3 SV=1 - [M0RDM4_RAT]	14.84	14	1	1	1	14.0599	11.0337					3.57818	14.84	1	1					128
P11915-2	Isoform SCP2 of Non-specific lipid-transfer protein OS=Rattus norvegicus GN=Scp2 - [NLTP_RAT]	13.29	3	1	1	1	15.2879	8.57275					2.26823	13.29	1	1					143
P20070-3	Isoform 3 of NADH-cytochrome b5 reductase 3 OS=Rattus norvegicus GN=Cyb5r3 - [NB5R3_RAT]	4.32	3	1	1	1	31.5713	8.14795					0	4.32	1	1					278
Q9Z1E1-2	Isoform 2 of Flotillin-1 OS=Rattus norvegicus GN=Flot1 - [FLOT1_RAT]	5.11	2	1	1	1	39.7453	7.41553					4.06194	5.11	1	1					352
P00159	Cytochrome b OS=Rattus norvegicus GN=Mt-Cyb PE=2 SV=2 - [CYB_RAT]	2.37	3	1	1	1	42.9698	7.98682									3.0423	2.37	1	1	380
Q9Z1P2	Alpha-actinin-1 OS=Rattus norvegicus GN=Actn1 PE=1 SV=1 - [ACTN1_RAT]	1.35	2	1	1	1	102.896	5.37646									2.6895	1.35	1	1	892
Q641Z6	EH domain-containing protein 1 OS=Rattus norvegicus GN=Ehd1 PE=1 SV=1 - [EHD1_RAT]	2.06	2	1	1	1	60.5646	6.82959									2.27252	2.06	1	1	534
Q9Z1N4	3'(2'),5'-bisphosphate nucleotidase 1 OS=Rattus norvegicus GN=Bpnt1 PE=1 SV=1 - [BPNT1_RAT]	5.19	1	1	1	1	33.1531	5.87158									2.10636	5.19	1	1	308
P08733	Myosin regulatory light chain 2, ventricular/cardiac muscle isoform OS=Rattus norvegicus GN=Myl2 PE=1 SV=2 - [MLRV_RAT]	7.83	1	1	1	1	18.8684	4.93213									3.31266	7.83	1	1	166
Q9WV97	Mitochondrial import inner membrane translocase subunit Tim9 OS=Rattus norvegicus GN=Timm9 PE=1 SV=3 - [TIM9_RAT]	17.98	1	1	1	1	10.3691	7.21045									2.24455	17.98	1	1	89
P0C089	Phosphatidylglycerophosphatase and protein-tyrosine phosphatase 1 OS=Rattus norvegicus GN=Ptpmt1 PE=2 SV=1 - [PTPM1_RAT]	6.74	2	1	1	1	21.8725	9.5835									2.70821	6.74	1	1	193
Q6AYD9	Nucleoside diphosphate-linked moiety X motif 19, mitochondrial OS=Rattus norvegicus GN=Nudt19 PE=2 SV=1 - [NUD19_RAT]	5.32	1	1	1	1	39.9133	6.88818									2.88563	5.32	1	1	357
O88989	Malate dehydrogenase, cytoplasmic OS=Rattus norvegicus GN=Mdh1 PE=1 SV=3 - [MDHC_RAT]	2.69	1	1	1	1	36.46	6.58057									1.80892	2.69	1	1	334
Q6P7S1	Acid ceramidase OS=Rattus norvegicus GN=Asah1 PE=2 SV=1 - [ASAH1_RAT]	4.57	1	1	1	1	44.4148	8.30908									2.13451	4.57	1	1	394
Q5XIE3	39S ribosomal protein L11, mitochondrial OS=Rattus norvegicus GN=Mrpl11 PE=2 SV=1 - [RM11_RAT]	8.37	1	1	1	1	22.4065	10.2573									1.95436	8.37	1	1	203
P35745	Acylphosphatase-2 OS=Rattus norvegicus GN=Acyp2 PE=1 SV=2 - [ACYP2_RAT]	13.4	2	1	1	1	10.8565	9.26123									2.16204	13.4	1	1	97
Q91ZW6	Trimethyllysine dioxygenase, mitochondrial OS=Rattus norvegicus GN=Tmlhe PE=1 SV=2 - [TMLH_RAT]	3.8	2	1	1	1	49.5361	8.41162									2.30673	3.8	1	1	421
P85972	Vinculin OS=Rattus norvegicus GN=Vcl PE=1 SV=1 - [VINC_RAT]	1.97	2	1	1	1	116.542	6.0874									2.42335	1.97	1	1	1066
P80432	Cytochrome c oxidase subunit 7C, mitochondrial OS=Rattus norvegicus GN=Cox7c PE=1 SV=2 - [COX7C_RAT]	14.29	1	1	1	1	7.36993	11.0044									2.25016	14.29	1	1	63
B0BNJ9	RCG44002, isoform CRA_a OS=Rattus norvegicus GN=Tmem14c PE=4 SV=1 - [B0BNJ9_RAT]	14.91	1	1	1	1	11.65	9.64209									2.68163	14.91	1	1	114
B2GV57	Protein Cars2 OS=Rattus norvegicus GN=Cars2 PE=2 SV=1 - [B2GV57_RAT]	2.55	1	1	1	1	60.8792	8.29443									2.08881	2.55	1	1	550
D3ZA93	Protein Acot13 OS=Rattus norvegicus GN=Acot13 PE=4 SV=1 - [D3ZA93_RAT]	7.14	1	1	1	1	15.2599	8.83643									1.87637	7.14	1	1	140
D3ZBM3	Ferrochelatase OS=Rattus norvegicus GN=Fech PE=3 SV=1 - [D3ZBM3_RAT]	3.32	1	1	1	1	47.5213	8.71924									2.60455	3.32	1	1	422
D3ZDE4	Deoxyguanosine kinase (Predicted), isoform CRA_a OS=Rattus norvegicus GN=Dguok PE=4 SV=1 - [D3ZDE4_RAT]	5.04	1	1	1	1	32.2073	7.95752									2.98584	5.04	1	1	278
D3ZM09	Protein Sars2 OS=Rattus norvegicus GN=Sars2 PE=3 SV=1 - [D3ZM09_RAT]	3.47	1	1	1	1	58.2499	8.06006									2.82262	3.47	1	1	518
D3ZPV7	Protein Foxred1 OS=Rattus norvegicus GN=Foxred1 PE=2 SV=1 - [D3ZPV7_RAT]	3.42	2	1	1	1	32.5817	8.44092									1.83326	3.42	1	1	292
D3ZUF9	Pitrilysin metallepetidase 1 (Predicted) OS=Rattus norvegicus GN=Pitrm1 PE=3 SV=1 - [D3ZUF9_RAT]	1.36	1	1	1	1	108.475	7.32764									1.90729	1.36	1	1	954
D3ZZV1	Mitochondrial import inner membrane translocase subunit TIM16 OS=Rattus norvegicus GN=Pam16 PE=4 SV=1 - [D3ZZV1_RAT]	21.6	1	1	1	1	13.7632	9.5249									2.58038	21.6	1	1	125
D4A264	Protein Zadh2 OS=Rattus norvegicus GN=Zadh2 PE=4 SV=2 - [D4A264_RAT]	4.51	1	1	1	1	40.5101	7.76709									4.33953	4.51	1	1	377
D4A8D5	Filamin, beta (Predicted) OS=Rattus norvegicus GN=Flnb PE=4 SV=1 - [D4A8D5_RAT]	0.43	3	1	1	1	275.144	5.73193									2.61458	0.43	1	1	2578
F1LN45	Protein Trpm3 (Fragment) OS=Rattus norvegicus GN=Trpm3 PE=4 SV=1 - [F1LN45_RAT]	1.02	1	1	1	1	189.183	7.2251									2.55686	1.02	1	1	1660
F1LNG8	Protein Mpv17 OS=Rattus norvegicus GN=Mpv17 PE=2 SV=1 - [F1LNG8_RAT]	7.14	2	1	1	1	17.119	9.5249									2.21959	7.14	1	1	154
F1LRT9	Cytoplasmic dynein 1 heavy chain 1 OS=Rattus norvegicus GN=Dync1h1 PE=2 SV=2 - [F1LRT9_RAT]	0.41	3	1	1	1	531.345	6.48096									2.50452	0.41	1	1	4643
F7FPF5	Protein LOC100366216 (Fragment) OS=Rattus norvegicus GN=Sp100 PE=4 SV=1 - [F7FPF5_RAT]	2.37	1	1	1	1	37.6263	5.66846									0	2.37	1	1	338
G3V644	NADH dehydrogenase (Ubiquinone) flavoprotein 3-like, isoform CRA_a OS=Rattus norvegicus GN=Ndufv3 PE=4 SV=1 - [G3V644_RAT]	5.9	1	1	1	1	49.2702	8.83643									0	5.9	1	1	458
G3V6R5	Sulfite oxidase OS=Rattus norvegicus GN=Suox PE=4 SV=1 - [G3V6R5_RAT]	2.01	2	1	1	1	60.7678	6.80029									2.16205	2.01	1	1	546
G3V7K3	Ceruloplasmin OS=Rattus norvegicus GN=Cp PE=4 SV=1 - [G3V7K3_RAT]	1.51	1	1	1	1	120.589	5.64307									2.3188	1.51	1	1	1059
G3V8V6	O-acetyl-ADP-ribose deacetylase MACROD1 OS=Rattus norvegicus GN=Macrod1 PE=4 SV=2 - [G3V8V6_RAT]	9.5	2	1	1	1	27.1243	9.02686									2.59314	9.5	1	1	242
G3V913	Heat shock 27kDa protein 1 OS=Rattus norvegicus GN=Hspb1 PE=3 SV=1 - [G3V913_RAT]	7.77	2	1	1	1	22.7935	6.21436									2.62485	7.77	1	1	206
G3V9I0	Procollagen-lysine,2-oxoglutarate 5-dioxygenase 2 OS=Rattus norvegicus GN=Plod2 PE=4 SV=1 - [G3V9I0_RAT]	2.04	4	1	1	1	84.5446	6.65381									2.87949	2.04	1	1	737
G3V9J1	Uncharacterized protein OS=Rattus norvegicus GN=LOC297568 PE=4 SV=2 - [G3V9J1_RAT]	1.01	9	1	1	1	144.701	8.1626									2.87484	1.01	1	1	1291
M0R5J4	Uncharacterized protein OS=Rattus norvegicus PE=3 SV=1 - [M0R5J4_RAT]	4.38	2	1	1	1	47.0452	6.3667									4.04543	4.38	1	1	434
M0RAD5	ATP-dependent Clp protease proteolytic subunit OS=Rattus norvegicus GN=Clpp PE=3 SV=1 - [M0RAD5_RAT]	6.62	1	1	1	1	29.7032	7.85498									3.47514	6.62	1	1	272
P84817-3	Isoform 3 of Mitochondrial fission 1 protein OS=Rattus norvegicus GN=Fis1 - [FIS1_RAT]	7.59	3	1	1	1	16.2405	9.24658									2.49644	7.59	1	1	145
Q3B8N9	Biphenyl hydrolase-like (Serine hydrolase) OS=Rattus norvegicus GN=Bphl PE=2 SV=1 - [Q3B8N9_RAT]	6.53	1	1	1	1	32.8021	8.79248									1.68528	6.53	1	1	291
Q8R3Z7	EH-domain containing 4 OS=Rattus norvegicus GN=Ehd4 PE=2 SV=1 - [Q8R3Z7_RAT]	2.77	1	1	1	1	61.4285	6.75635									2.06224	2.77	1	1	541
Q9WVJ6	Protein Tgm2 OS=Rattus norvegicus GN=Tgm2 PE=2 SV=1 - [Q9WVJ6_RAT]	2.19	1	1	1	1	76.8861	5.09717									2.20548	2.19	1	1	686
Q9Z0J5-2	Isoform 2 of Thioredoxin reductase 2, mitochondrial OS=Rattus norvegicus GN=Txnrd2 - [TRXR2_RAT]	2.65	3	1	1	1	53.206	7.7085									2.86854	2.65	1	1	491

## Sheet: Table S4
Table S4.
Representative proteins from selected functional classes.
Accession	Description
	ETC/OXPHOS - ORANGE
	FUSION/FISSION - GREEN
	OTHER - GRAY
	TIM/TOM PROTEIN IMPORT - BLUE
	MITOCHONDRIAL RISOBOME - PURPLE
P15999	ATP synthase subunit alpha, mitochondrial OS=Rattus norvegicus GN=Atp5a1 PE=1 SV=2 - [ATPA_RAT]
G3V6D3	ATP synthase subunit beta OS=Rattus norvegicus GN=Atp5b PE=3 SV=1 - [G3V6D3_RAT]
Q66HF1	NADH-ubiquinone oxidoreductase 75 kDa subunit, mitochondrial OS=Rattus norvegicus GN=Ndufs1 PE=1 SV=1 - [NDUS1_RAT]
Q920L2	Succinate dehydrogenase [ubiquinone] flavoprotein subunit, mitochondrial OS=Rattus norvegicus GN=Sdha PE=1 SV=1 - [DHSA_RAT]
P32551	Cytochrome b-c1 complex subunit 2, mitochondrial OS=Rattus norvegicus GN=Uqcrc2 PE=1 SV=2 - [QCR2_RAT]
P19511	ATP synthase subunit b, mitochondrial OS=Rattus norvegicus GN=Atp5f1 PE=1 SV=1 - [AT5F1_RAT]
Q68FY0	Cytochrome b-c1 complex subunit 1, mitochondrial OS=Rattus norvegicus GN=Uqcrc1 PE=1 SV=1 - [QCR1_RAT]
P35435	ATP synthase subunit gamma, mitochondrial OS=Rattus norvegicus GN=Atp5c1 PE=1 SV=2 - [ATPG_RAT]
P20788	Cytochrome b-c1 complex subunit Rieske, mitochondrial OS=Rattus norvegicus GN=Uqcrfs1 PE=1 SV=2 - [UCRI_RAT]
Q5BK63	NADH dehydrogenase [ubiquinone] 1 alpha subcomplex subunit 9, mitochondrial OS=Rattus norvegicus GN=Ndufa9 PE=1 SV=2 - [NDUA9_RAT]
Q06647	ATP synthase subunit O, mitochondrial OS=Rattus norvegicus GN=Atp5o PE=1 SV=1 - [ATPO_RAT]
Q5XIH3	NADH dehydrogenase (Ubiquinone) flavoprotein 1 OS=Rattus norvegicus GN=Ndufv1 PE=2 SV=1 - [Q5XIH3_RAT]
D3ZG43	NADH dehydrogenase (Ubiquinone) Fe-S protein 3 (Predicted), isoform CRA_c OS=Rattus norvegicus GN=Ndufs3 PE=3 SV=1 - [D3ZG43_RAT]
P31399	ATP synthase subunit d, mitochondrial OS=Rattus norvegicus GN=Atp5h PE=1 SV=3 - [ATP5H_RAT]
P00406	Cytochrome c oxidase subunit 2 OS=Rattus norvegicus GN=Mtco2 PE=2 SV=2 - [COX2_RAT]
Q2TA68	Dynamin-like 120 kDa protein, mitochondrial OS=Rattus norvegicus GN=Opa1 PE=1 SV=1 - [OPA1_RAT]
Q561S0	NADH dehydrogenase [ubiquinone] 1 alpha subcomplex subunit 10, mitochondrial OS=Rattus norvegicus GN=Ndufa10 PE=1 SV=1 - [NDUAA_RAT]
P10888	Cytochrome c oxidase subunit 4 isoform 1, mitochondrial OS=Rattus norvegicus GN=Cox4i1 PE=1 SV=1 - [COX41_RAT]
P11240	Cytochrome c oxidase subunit 5A, mitochondrial OS=Rattus norvegicus GN=Cox5a PE=1 SV=1 - [COX5A_RAT]
Q641Y2	NADH dehydrogenase [ubiquinone] iron-sulfur protein 2, mitochondrial OS=Rattus norvegicus GN=Ndufs2 PE=1 SV=1 - [NDUS2_RAT]
D4A0T0	Protein Ndufb10 OS=Rattus norvegicus GN=Ndufb10 PE=4 SV=1 - [D4A0T0_RAT]
Q6PDU7	ATP synthase subunit g, mitochondrial OS=Rattus norvegicus GN=Atp5l PE=1 SV=2 - [ATP5L_RAT]
P21913	Succinate dehydrogenase [ubiquinone] iron-sulfur subunit, mitochondrial OS=Rattus norvegicus GN=Sdhb PE=2 SV=2 - [DHSB_RAT]
D3ZE15	Protein LOC100911483 OS=Rattus norvegicus GN=Ndufa13 PE=4 SV=1 - [D3ZE15_RAT]
D3ZLT1	NADH dehydrogenase (Ubiquinone) 1 beta subcomplex, 7 (Predicted) OS=Rattus norvegicus GN=Ndufb7 PE=4 SV=1 - [D3ZLT1_RAT]
Q63362	NADH dehydrogenase [ubiquinone] 1 alpha subcomplex subunit 5 OS=Rattus norvegicus GN=Ndufa5 PE=1 SV=3 - [NDUA5_RAT]
B0BNE6	NADH dehydrogenase (Ubiquinone) Fe-S protein 8 (Predicted), isoform CRA_a OS=Rattus norvegicus GN=Ndufs8 PE=2 SV=1 - [B0BNE6_RAT]
Q5XIF3	NADH dehydrogenase [ubiquinone] iron-sulfur protein 4, mitochondrial OS=Rattus norvegicus GN=Ndufs4 PE=1 SV=1 - [NDUS4_RAT]
F1LXA0	NADH dehydrogenase (Ubiquinone) 1 alpha subcomplex, 12 (Predicted), isoform CRA_b OS=Rattus norvegicus GN=LOC100910710 PE=4 SV=2 - [F1LXA0_RAT]
Q5RJN0	NADH dehydrogenase (Ubiquinone) Fe-S protein 7 OS=Rattus norvegicus GN=Ndufs7 PE=2 SV=1 - [Q5RJN0_RAT]
P19234	NADH dehydrogenase [ubiquinone] flavoprotein 2, mitochondrial OS=Rattus norvegicus GN=Ndufv2 PE=1 SV=2 - [NDUV2_RAT]
Q8SEZ0	NADH-ubiquinone oxidoreductase chain 5 OS=Rattus norvegicus GN=Mt-nd5 PE=3 SV=1 - [Q8SEZ0_RAT]
D3ZD09	Cytochrome c oxidase subunit 6B1 OS=Rattus norvegicus GN=Cox6b1 PE=4 SV=1 - [D3ZD09_RAT]
P12075	Cytochrome c oxidase subunit 5B, mitochondrial OS=Rattus norvegicus GN=Cox5b PE=1 SV=2 - [COX5B_RAT]
Q80W89	NADH dehydrogenase [ubiquinone] 1 alpha subcomplex subunit 11 OS=Rattus norvegicus GN=Ndufa11 PE=2 SV=1 - [NDUAB_RAT]
D4A565	NADH dehydrogenase (Ubiquinone) 1 beta subcomplex, 5 (Predicted), isoform CRA_b OS=Rattus norvegicus GN=Ndufb5 PE=4 SV=1 - [D4A565_RAT]
D4A7L4	NADH dehydrogenase (Ubiquinone) 1 beta subcomplex, 11 (Predicted) OS=Rattus norvegicus GN=Ndufb11 PE=4 SV=1 - [D4A7L4_RAT]
B2RYS2	Cytochrome b-c1 complex subunit 7 OS=Rattus norvegicus GN=Uqcrb PE=3 SV=1 - [B2RYS2_RAT]
B2RYS8	NADH dehydrogenase (Ubiquinone) 1 beta subcomplex 8 OS=Rattus norvegicus GN=Ndufb8 PE=2 SV=1 - [B2RYS8_RAT]
P29419	ATP synthase subunit e, mitochondrial OS=Rattus norvegicus GN=Atp5i PE=1 SV=3 - [ATP5I_RAT]
B5DEL8	NADH dehydrogenase (Ubiquinone) Fe-S protein 5 OS=Rattus norvegicus GN=Ndufs5 PE=4 SV=1 - [B5DEL8_RAT]
B2RYW3	NADH dehydrogenase (Ubiquinone) 1 beta subcomplex, 9 OS=Rattus norvegicus GN=Ndufb9 PE=2 SV=1 - [B2RYW3_RAT]
B2RZD6	Ndufa4 protein OS=Rattus norvegicus GN=Ndufa4 PE=4 SV=1 - [B2RZD6_RAT]
H9KVF8	NADH-ubiquinone oxidoreductase chain 1 (Fragment) OS=Rattus norvegicus GN=7066247 PE=3 SV=1 - [H9KVF8_RAT]
Q5PQZ9	NADH dehydrogenase [ubiquinone] 1 subunit C2 OS=Rattus norvegicus GN=Ndufc2 PE=2 SV=1 - [Q5PQZ9_RAT]
Q7TP78	Aa2-258 OS=Rattus norvegicus GN=Ndufa8 PE=2 SV=1 - [Q7TP78_RAT]
P05508	NADH-ubiquinone oxidoreductase chain 4 OS=Rattus norvegicus GN=Mtnd4 PE=2 SV=2 - [NU4M_RAT]
G3V7Y3	ATP synthase subunit delta, mitochondrial OS=Rattus norvegicus GN=Atp5d PE=3 SV=1 - [G3V7Y3_RAT]
P10817	Cytochrome c oxidase subunit 6A2, mitochondrial (Fragment) OS=Rattus norvegicus GN=Cox6a2 PE=1 SV=3 - [CX6A2_RAT]
P11951	Cytochrome c oxidase subunit 6C-2 OS=Rattus norvegicus GN=Cox6c2 PE=1 SV=3 - [CX6C2_RAT]
D3ZAF6	ATP synthase subunit f, mitochondrial OS=Rattus norvegicus GN=Atp5j2 PE=1 SV=1 - [ATPK_RAT]
D4A3V2	NADH dehydrogenase [ubiquinone] 1 alpha subcomplex subunit 6 OS=Rattus norvegicus GN=Ndufa6 PE=3 SV=1 - [D4A3V2_RAT]
D3ZZ21	NADH dehydrogenase (Ubiquinone) 1 beta subcomplex, 6 (Predicted) OS=Rattus norvegicus GN=Ndufb6 PE=4 SV=1 - [D3ZZ21_RAT]
Q5M9I5	Cytochrome b-c1 complex subunit 6, mitochondrial OS=Rattus norvegicus GN=Uqcrh PE=3 SV=1 - [QCR6_RAT]
P35171	Cytochrome c oxidase subunit 7A2, mitochondrial OS=Rattus norvegicus GN=Cox7a2 PE=1 SV=1 - [CX7A2_RAT]
A9UMV9	Ndufa7 protein OS=Rattus norvegicus GN=Ndufa7 PE=4 SV=1 - [A9UMV9_RAT]
Q7TQ16	Cytochrome b-c1 complex subunit 8 OS=Rattus norvegicus GN=Uqcrq PE=3 SV=1 - [QCR8_RAT]
D3ZS58	NADH dehydrogenase [ubiquinone] 1 alpha subcomplex subunit 2 OS=Rattus norvegicus GN=Ndufa2 PE=3 SV=1 - [D3ZS58_RAT]
P11608	ATP synthase protein 8 OS=Rattus norvegicus GN=Mt-atp8 PE=1 SV=1 - [ATP8_RAT]
H9KVF5	NADH-ubiquinone oxidoreductase chain 3 (Fragment) OS=Rattus norvegicus GN=7066254 PE=3 SV=1 - [H9KVF5_RAT]
G3V640	Mitochondrial import inner membrane translocase subunit TIM44 OS=Rattus norvegicus GN=Timm44 PE=4 SV=1 - [G3V640_RAT]
Q5U2X7	Mitochondrial import inner membrane translocase subunit Tim21 OS=Rattus norvegicus GN=Timm21 PE=2 SV=1 - [TIM21_RAT]
D3ZJX5	Protein Timm50 OS=Rattus norvegicus GN=LOC687295 PE=4 SV=2 - [D3ZJX5_RAT]
P21571	ATP synthase-coupling factor 6, mitochondrial OS=Rattus norvegicus GN=Atp5j PE=1 SV=1 - [ATP5J_RAT]
D3ZYX8	Cytochrome c oxidase subunit VIIa polypeptide 2 like (Predicted), isoform CRA_e OS=Rattus norvegicus GN=Cox7a2l PE=4 SV=1 - [D3ZYX8_RAT]
Q75Q41	Mitochondrial import receptor subunit TOM22 homolog OS=Rattus norvegicus GN=Tomm22 PE=1 SV=1 - [TOM22_RAT]
P05503	Cytochrome c oxidase subunit 1 OS=Rattus norvegicus GN=Mtco1 PE=2 SV=2 - [COX1_RAT]
Q6PCU8	NADH dehydrogenase [ubiquinone] flavoprotein 3, mitochondrial OS=Rattus norvegicus GN=Ndufv3 PE=3 SV=1 - [NDUV3_RAT]
P11662	NADH-ubiquinone oxidoreductase chain 2 OS=Rattus norvegicus GN=Mtnd2 PE=2 SV=2 - [NU2M_RAT]
P80432	Cytochrome c oxidase subunit 7C, mitochondrial OS=Rattus norvegicus GN=Cox7c PE=1 SV=2 - [COX7C_RAT]
P05505	Cytochrome c oxidase subunit 3 OS=Rattus norvegicus GN=Mtco3 PE=1 SV=5 - [COX3_RAT]
O08776-4	Isoform 4 of NADH dehydrogenase [ubiquinone] 1 alpha subcomplex assembly factor 3 OS=Rattus norvegicus GN=Ndufaf3 - [NDUF3_RAT]
P52504	NADH dehydrogenase [ubiquinone] iron-sulfur protein 6, mitochondrial OS=Rattus norvegicus GN=Ndufs6 PE=3 SV=1 - [NDUS6_RAT]
D3ZN43	NADH dehydrogenase (ubiquinone) complex I, assembly factor 6 OS=Rattus norvegicus GN=Ndufaf6 PE=3 SV=1 - [NDUF6_RAT]
B2RZ31	Protein Sirt3 OS=Rattus norvegicus GN=Sirt3 PE=2 SV=1 - [B2RZ31_RAT]
P84817-3	Isoform 3 of Mitochondrial fission 1 protein OS=Rattus norvegicus GN=Fis1 - [FIS1_RAT]
P62076	Mitochondrial import inner membrane translocase subunit Tim13 OS=Rattus norvegicus GN=Timm13 PE=3 SV=1 - [TIM13_RAT]
Q9WV97	Mitochondrial import inner membrane translocase subunit Tim9 OS=Rattus norvegicus GN=Timm9 PE=1 SV=3 - [TIM9_RAT]
Q62760	Mitochondrial import receptor subunit TOM20 homolog OS=Rattus norvegicus GN=Tomm20 PE=1 SV=2 - [TOM20_RAT]
F1M8L6	Protein Ndufa3 OS=Rattus norvegicus GN=Ndufa3 PE=2 SV=1 - [F1M8L6_RAT]
O35092	Mitochondrial import inner membrane translocase subunit Tim17-A OS=Rattus norvegicus GN=Timm17a PE=2 SV=1 - [TI17A_RAT]
G3V9S0	Cytochrome b5 reductase 1 OS=Rattus norvegicus GN=Cyb5r1 PE=4 SV=1 - [G3V9S0_RAT]
Q06645	ATP synthase lipid-binding protein, mitochondrial OS=Rattus norvegicus GN=Atp5g1 PE=1 SV=1 - [AT5G1_RAT]
Q9NQR8	NADH dehydrogenase [ubiquinone] 1 alpha subcomplex assembly factor 4 OS=Rattus norvegicus GN=Ndufaf4 PE=1 SV=1 - [NDUF4_RAT]
R9PXR4	Mitochondrial import receptor subunit TOM70 OS=Rattus norvegicus GN=Tomm70a PE=4 SV=1 - [R9PXR4_RAT]
G3V644	NADH dehydrogenase (Ubiquinone) flavoprotein 3-like, isoform CRA_a OS=Rattus norvegicus GN=Ndufv3 PE=4 SV=1 - [G3V644_RAT]
Q6PCT8	Succinate dehydrogenase [ubiquinone] cytochrome b small subunit, mitochondrial OS=Rattus norvegicus GN=Sdhd PE=2 SV=1 - [DHSD_RAT]
D3ZTW7	ATP synthase mitochondrial F1 complex assembly factor 2 (Predicted), isoform CRA_c OS=Rattus norvegicus GN=Atpaf2 PE=4 SV=1 - [D3ZTW7_RAT]
O35093	Mitochondrial import inner membrane translocase subunit Tim23 OS=Rattus norvegicus GN=Timm23 PE=2 SV=1 - [TIM23_RAT]
F1LWG4	NADH dehydrogenase (Ubiquinone) 1 alpha subcomplex, assembly factor 1 (Predicted), isoform CRA_a OS=Rattus norvegicus GN=Ndufaf1 PE=4 SV=2 - [F1LWG4_RAT]
P62078	Mitochondrial import inner membrane translocase subunit Tim8 B OS=Rattus norvegicus GN=Timm8b PE=3 SV=1 - [TIM8B_RAT]
Q9WVA1	Mitochondrial import inner membrane translocase subunit Tim8 A OS=Rattus norvegicus GN=Timm8a PE=1 SV=1 - [TIM8A_RAT]
Q68FX9	NAD-dependent protein deacylase sirtuin-5, mitochondrial OS=Rattus norvegicus GN=Sirt5 PE=2 SV=1 - [SIR5_RAT]
Q8R4Z9	Mitofusin-1 OS=Rattus norvegicus GN=Mfn1 PE=1 SV=1 - [MFN1_RAT]
Q5XIM4	ATP synthase subunit s, mitochondrial OS=Rattus norvegicus GN=Atp5s PE=2 SV=1 - [ATP5S_RAT]
A9UMV7	Protein Uqcr11 OS=Rattus norvegicus GN=LOC686442 PE=4 SV=1 - [A9UMV7_RAT]
B2RYU0	NADH dehydrogenase (Ubiquinone) 1 beta subcomplex, 2 (Predicted), isoform CRA_b OS=Rattus norvegicus GN=Ndufb2 PE=4 SV=1 - [B2RYU0_RAT]
D3ZZV1	Mitochondrial import inner membrane translocase subunit TIM16 OS=Rattus norvegicus GN=Pam16 PE=4 SV=1 - [D3ZZV1_RAT]
Q7H113	NADH-ubiquinone oxidoreductase chain 4 OS=Rattus norvegicus GN=Mt-nd4l PE=3 SV=1 - [Q7H113_RAT]
P29418	ATP synthase subunit epsilon, mitochondrial OS=Rattus norvegicus GN=Atp5e PE=1 SV=2 - [ATP5E_RAT]
D3ZY50	ATP synthase mitochondrial F1 complex assembly factor 1 (Predicted), isoform CRA_a OS=Rattus norvegicus GN=Atpaf1 PE=4 SV=1 - [D3ZY50_RAT]
P05504	ATP synthase subunit a OS=Rattus norvegicus GN=Mt-atp6 PE=1 SV=2 - [ATP6_RAT]
Q5I0I4	ATP synthase subunit s-like protein OS=Rattus norvegicus GN=Atp5sl PE=2 SV=1 - [AT5SL_RAT]
Q5RJQ7	Succinate dehydrogenase assembly factor 2, mitochondrial OS=Rattus norvegicus GN=Sdhaf2 PE=2 SV=1 - [SDHF2_RAT]
G3V8F5	Mitochondrial import receptor subunit TOM40 homolog OS=Rattus norvegicus GN=Tomm40 PE=4 SV=1 - [G3V8F5_RAT]
P10818	Cytochrome c oxidase subunit 6A1, mitochondrial OS=Rattus norvegicus GN=Cox6a1 PE=1 SV=2 - [CX6A1_RAT]
G3V9S6	Protein Ndufa1 OS=Rattus norvegicus GN=Ndufa1 PE=4 SV=2 - [G3V9S6_RAT]
Q5BJN5	Mitochondrial intermembrane space import and assembly protein 40 OS=Rattus norvegicus GN=Chchd4 PE=2 SV=1 - [MIA40_RAT]
Q9JKW1	Mitochondrial import inner membrane translocase subunit Tim22 OS=Rattus norvegicus GN=Timm22 PE=2 SV=2 - [TIM22_RAT]
A4F267	Mitochondrial import receptor subunit TOM40B OS=Rattus norvegicus GN=Tomm40l PE=1 SV=1 - [TM40L_RAT]
Q5XI79	NADH dehydrogenase [ubiquinone] complex I, assembly factor 7 OS=Rattus norvegicus GN=Ndufaf7 PE=2 SV=1 - [NDUF7_RAT]
Q4KM98	Mitochondrial fission factor OS=Rattus norvegicus GN=Mff PE=2 SV=1 - [MFF_RAT]
Q5XII9	Mitochondrial fission regulator 1-like OS=Rattus norvegicus GN=Mtfr1l PE=2 SV=1 - [MFR1L_RAT]
B2GV62	Mitochondrial ribosomal protein L20 OS=Rattus norvegicus GN=Mrpl20 PE=2 SV=1 - [B2GV62_RAT]
Q63750	39S ribosomal protein L23, mitochondrial OS=Rattus norvegicus GN=Mrpl23 PE=2 SV=1 - [RM23_RAT]
D3ZX69	39S ribosomal protein L10, mitochondrial OS=Rattus norvegicus GN=Mrpl10 PE=4 SV=1 - [D3ZX69_RAT]
P0C2C0	39S ribosomal protein L22, mitochondrial OS=Rattus norvegicus GN=Mrpl22 PE=1 SV=1 - [RM22_RAT]
D4ABM5	Mitochondrial ribosomal protein S34 (Predicted), isoform CRA_a OS=Rattus norvegicus GN=Mrps34 PE=4 SV=1 - [D4ABM5_RAT]
F1LMZ4	Ribosome-releasing factor 2, mitochondrial OS=Rattus norvegicus GN=Gfm2 PE=2 SV=2 - [F1LMZ4_RAT]
Q9EPJ3	28S ribosomal protein S26, mitochondrial OS=Rattus norvegicus GN=Mrps26 PE=1 SV=1 - [RT26_RAT]
Q6PDW6	39S ribosomal protein L17, mitochondrial OS=Rattus norvegicus GN=Mrpl17 PE=2 SV=1 - [RM17_RAT]
D4A131	Mitochondrial ribosomal protein L4 (Predicted), isoform CRA_b OS=Rattus norvegicus GN=Mrpl4 PE=3 SV=1 - [D4A131_RAT]
Q7TQ82	28S ribosomal protein S10, mitochondrial OS=Rattus norvegicus GN=Mrps10 PE=2 SV=1 - [RT10_RAT]
B2RZ57	Mitochondrial ribosomal protein L18 OS=Rattus norvegicus GN=Mrpl18 PE=2 SV=1 - [B2RZ57_RAT]
Q5I0K8	28S ribosomal protein S7, mitochondrial OS=Rattus norvegicus GN=Mrps7 PE=2 SV=2 - [RT07_RAT]
D3ZMR9	Mitochondrial ribosomal protein L21 (Predicted), isoform CRA_a OS=Rattus norvegicus GN=Mrpl21 PE=4 SV=1 - [D3ZMR9_RAT]
D3ZYT2	Mitochondrial ribosomal protein S5 (Predicted) OS=Rattus norvegicus GN=Mrps5 PE=3 SV=1 - [D3ZYT2_RAT]
D4A4B1	Mitochondrial ribosomal protein L15 (Predicted), isoform CRA_c OS=Rattus norvegicus GN=Mrpl15 PE=3 SV=2 - [D4A4B1_RAT]
Q4G067	Mitochondrial ribosomal protein L44 OS=Rattus norvegicus GN=Mrpl44 PE=2 SV=1 - [Q4G067_RAT]
Q6AXT0	39S ribosomal protein L37, mitochondrial OS=Rattus norvegicus GN=Mrpl37 PE=2 SV=1 - [RM37_RAT]
B0BN68	Mitochondrial ribosomal protein S9 OS=Rattus norvegicus GN=Mrps9 PE=2 SV=1 - [B0BN68_RAT]
Q0ZFS4	Mitochondrial ribosomal protein S33 (Predicted), isoform CRA_a OS=Rattus norvegicus GN=Mrps33 PE=4 SV=1 - [Q0ZFS4_RAT]
Q5XFW4	Mitochondrial ribosomal protein L13 OS=Rattus norvegicus GN=Mrpl13 PE=2 SV=1 - [Q5XFW4_RAT]
Q5XIE3	39S ribosomal protein L11, mitochondrial OS=Rattus norvegicus GN=Mrpl11 PE=2 SV=1 - [RM11_RAT]
D3ZIN7	Mitochondrial ribosomal protein S23 (Predicted), isoform CRA_b OS=Rattus norvegicus GN=Mrps23 PE=4 SV=1 - [D3ZIN7_RAT]
Q5RK00	39S ribosomal protein L46, mitochondrial OS=Rattus norvegicus GN=Mrpl46 PE=2 SV=1 - [RM46_RAT]
F6Q5K7	Mitochondrial ribosomal protein S18B, isoform CRA_a OS=Rattus norvegicus GN=Mrps18b PE=4 SV=1 - [F6Q5K7_RAT]
P18665	39S ribosomal protein L3, mitochondrial OS=Rattus norvegicus GN=Mrpl3 PE=3 SV=1 - [RM03_RAT]
Q5M818	39S ribosomal protein L16, mitochondrial OS=Rattus norvegicus GN=Mrpl16 PE=2 SV=1 - [RM16_RAT]
B0BN56	28S ribosomal protein S31, mitochondrial OS=Rattus norvegicus GN=Mrps31 PE=2 SV=1 - [RT31_RAT]
Q5PQN9	39S ribosomal protein L38, mitochondrial OS=Rattus norvegicus GN=Mrpl38 PE=2 SV=2 - [RM38_RAT]
B2RYT0	Mitochondrial ribosomal protein S21 (Predicted), isoform CRA_a OS=Rattus norvegicus GN=Mrps21 PE=4 SV=1 - [B2RYT0_RAT]
B2RYW4	Mitochondrial ribosomal protein L53 OS=Rattus norvegicus GN=Mrpl53 PE=4 SV=1 - [B2RYW4_RAT]
D4A9Z6	Mitochondrial ribosomal protein S35 (Predicted) OS=Rattus norvegicus GN=Mrps35 PE=4 SV=1 - [D4A9Z6_RAT]
D4AEG6	Mitochondrial ribosomal protein L32 (Predicted) OS=Rattus norvegicus GN=Mrpl32 PE=4 SV=1 - [D4AEG6_RAT]
P0C2C1	39S ribosomal protein L30, mitochondrial OS=Rattus norvegicus GN=Mrpl30 PE=1 SV=1 - [RM30_RAT]
D3Z9K2	Mitochondrial ribosomal protein L54 (Predicted) OS=Rattus norvegicus GN=Mrpl54 PE=4 SV=1 - [D3Z9K2_RAT]
D3ZDX7	Mitochondrial ribosomal protein L48 (Predicted), isoform CRA_c OS=Rattus norvegicus GN=Mrpl48 PE=4 SV=1 - [D3ZDX7_RAT]
D3ZYL4	Mitochondrial ribosomal protein L50 (Predicted) OS=Rattus norvegicus GN=Mrpl50 PE=4 SV=1 - [D3ZYL4_RAT]
D4A3E8	Mitochondrial ribosomal protein S27 (Predicted), isoform CRA_b OS=Rattus norvegicus GN=Mrps27 PE=4 SV=1 - [D4A3E8_RAT]
D4A4V1	Mitochondrial ribosomal protein S18C (Predicted), isoform CRA_a OS=Rattus norvegicus GN=Mrps18c PE=3 SV=1 - [D4A4V1_RAT]
Q641X9	39S ribosomal protein L9, mitochondrial OS=Rattus norvegicus GN=Mrpl9 PE=2 SV=1 - [RM09_RAT]

## Sheet: Table S5
SDS-PAGE							IEF
peptide				modified residue	PhosphoSite**	Swiss-Prot accession	peptide			modified residue	PhosphoSite**	Swiss-Prot accession
QITADKQYKGIIDCVVR				k52	yes, human	Q09073	IEANEALVK			k165	yes	P35434
YATLPNIMKAK				k190	no	Q68FU3	LASLSEKPPAIDWAYYR
AQQALVQKR				k62	yes	P19511	IPVPEDKYTALVDAEEKEDVK			k85	yes	P31399
LASLSEKPPAIDWAYYR				k48	yes	P31399	ANVDKPGLVDDFK			k63	no	P31399
TIVAINKDPEAPIFQVADYGIVADLFK				k281	no	P13803	ANLEKAQSELSGAADEAAR			k136	yes	P35434
DQTPGKGTLEDQIIQANPALEAFGNAK				k213	yes	P02564	LGEHNINVLEGDEQFVNAAK
QLEAEKLELQSALEEAEASLEHEEGK				k1537	no	P02564	DQTNDQVTIDSALATQKYSVAVK			k106	no, yes (human)	P56574
NLADKAPSM*VAAAVTYSKPR				k11	no	Q6PDU7	SLGVGYAAVDNPIFYKPNTAM*LLGDAK				no, yes in human	Q5BJZ3
MESHKPSTNKDDLIFNIIPR				k5	no	Q5HZA9	DFLAGGIAAAVSKTAVAPIER
LGGKLSPEDKETMEK				k585	no (yes in human)	P06761	ANVDKPGLVDDFKNK			k71	yes	P31399
LGGKLSPEDKETM*EK				k585	no (yes in human)	P06761	AFAAGADIKEMQNR
AFFKGAWSNVLR				k272	yes	Q09073
QYKGIIDCVVR				k52	no, yes human	Q05962	PLRP
DFKVDQEIINIIQER				k97	no	D4A0T0	peptide			modified residue	PhosphoSite**	Swiss-Prot accession
VDSGIQPGSDISIYHDPMISK				k460	no	P14882	YATLPNIMKAK
LGEHNINVLEGDEQFVNAAK				k92	no	P00763	YATLPNIMK
LKEIVTNFLAGFEP				k541	yes	P15999	QYKGIIDCVVR
QKEVNENFAIDLIAQQPVNEVDHR				k53	no	P52504	IFQALNGATDEVVLK			k232	no	Q811A3
FKDIFQEIFDK				k263	yes	P56574	YATLPNIM*K
AKDINQEVYNFLATAGAK				k144	no (yes in human)	Q9ER34
EKSEFKLELDDVTSNMEQIIK				k1221	no	P02564
AGLLGLLEEMRDDK				k788	no	F1LRV9	* Oxidized Methionine
DFLAGGIAAAVSKTAVAPIER				k23	yes	Q05962	** Phosphosite searches were performed in March 2014
NIEPVYLNVLLEKLR				k327	no	D3Z822
LQDLVDKLQAK				k1884	no	P04462	Peptides highlighted in Green were also identified with SDS-PAGE.
DTQLITVDEKLDVTPLTGVPEEHIK				k58	no	Q5XIF3
KLENLLQGGEVEEVILQAEK				k67	no	Q63362
KAEAQIAGK				k82	no	P00507
* Oxidized Methionine
** Phosphosite searches were performed in March 2014
